# Supplementary material
Source: MDPI journal article supplement (https://www.mdpi.com/1424-8247/16/6/792)
Supplement: s1 [file s1]

# Sesquiterpene Coumarin Ethers with Selective Cytotoxic Activities from the Roots of *Ferula huber-morathii* Peşmen (Apiaceae) and Unequivocal Determination of the Absolute Stereochemistry of Samarcandin

Fatma Memnune Eruçar <sup>1</sup>, Fadıl Kaan Kuran <sup>1</sup>, Gülsüm Altıparmak Ülbegi <sup>2</sup>, Süheyla Özbey <sup>3</sup>, Şule Nur Karavuş <sup>4</sup>, Gülşah Gamze Arcan <sup>2</sup>, Seçil Yazıcı Tütüniş <sup>1</sup>, Nur Tan <sup>1</sup>, Pınar Aksoy Sağırılı <sup>2</sup> and Mahmut Miski <sup>1,\*</sup>

<sup>1</sup> Department of Pharmacognosy, Faculty of Pharmacy, İstanbul University, 34116 İstanbul, Türkiye; memnune.erucar@istanbul.edu.tr (F.M.E.); kaankuran@istanbul.edu.tr (F.K.K.); secilyaz@istanbul.edu.tr (S.Y.T.); nurtan@istanbul.edu.tr (N.T.)

<sup>2</sup> Department of Biochemistry, Faculty of Pharmacy, İstanbul University, 34116 İstanbul, Türkiye; gulsum.altiparmakulbegi@istanbul.edu.tr (G.A.Ü.); gamze.arcan@istanbul.edu.tr (G.G.A.); aksoyp@istanbul.edu.tr (P.A.S.)

<sup>3</sup> Department of Engineering Physics, Faculty of Engineering, Hacettepe University, 06800 Ankara, Türkiye; sozbey@hacettepe.edu.tr

<sup>4</sup> Department of Pharmacognosy, School of Pharmacy, İstanbul Medipol University, 34810 İstanbul, Türkiye; sule.karavus@medipol.edu.tr

\* Correspondence: mahmut.miski@gmail.com; Tel.: +90-545-550-4455

## Table of Contents

|                                                                                                                                                                           |    |
|---------------------------------------------------------------------------------------------------------------------------------------------------------------------------|----|
| <b>Figure S1.</b> Bioactivity-guided isolation scheme for the cytotoxic sesquiterpene coumarins of the dichloromethane root extract of <i>Ferula huber-morathii</i> ..... | 6  |
| <b>Figure S2.</b> <sup>1</sup> H-NMR spectrum (500 MHz, CDCl <sub>3</sub> ) of conferone (1).....                                                                         | 8  |
| <b>Figure S3.</b> <sup>13</sup> C-NMR spectrum (125 MHz, CDCl <sub>3</sub> ) of conferone (1) .....                                                                       | 9  |
| <b>Figure S4.</b> <sup>1</sup> H- <sup>1</sup> H COSY spectrum (CDCl <sub>3</sub> ) of conferone (1) .....                                                                | 10 |
| <b>Figure S5.</b> HSQC spectrum (CDCl <sub>3</sub> ) of conferone (1) .....                                                                                               | 11 |
| <b>Figure S6.</b> HMBC spectrum (CDCl <sub>3</sub> ) of conferone (1) .....                                                                                               | 12 |
| <b>Figure S7.</b> NOESY spectrum (CDCl <sub>3</sub> ) of conferone (1).....                                                                                               | 13 |
| <b>Figure S8.</b> <sup>1</sup> H-NMR spectrum (500 MHz, CDCl <sub>3</sub> ) of conferol (2).....                                                                          | 14 |
| <b>Figure S9.</b> <sup>13</sup> C-NMR (APT) spectrum (125 MHz, CDCl <sub>3</sub> ) of conferol (2).....                                                                   | 15 |
| <b>Figure S10.</b> <sup>1</sup> H- <sup>1</sup> H COSY spectrum (CDCl <sub>3</sub> ) of conferol (2).....                                                                 | 16 |
| <b>Figure S11.</b> HSQC spectrum (CDCl <sub>3</sub> ) of conferol (2) .....                                                                                               | 17 |
| <b>Figure S12.</b> HMBC spectrum (CDCl <sub>3</sub> ) of conferol (2) .....                                                                                               | 18 |
| <b>Figure S13.</b> NOESY spectrum (CDCl <sub>3</sub> ) of conferol (2).....                                                                                               | 19 |
| <b>Figure S14.</b> <sup>1</sup> H-NMR spectrum (500 MHz, CDCl <sub>3</sub> ) of feselol (3).....                                                                          | 20 |
| <b>Figure S15.</b> <sup>13</sup> C-NMR spectrum (125 MHz, CDCl <sub>3</sub> ) of feselol (3) .....                                                                        | 21 |
| <b>Figure S16.</b> <sup>1</sup> H- <sup>1</sup> H COSY spectrum (CDCl <sub>3</sub> ) of feselol (3).....                                                                  | 22 |
| <b>Figure S17.</b> HSQC spectrum (CDCl <sub>3</sub> ) of feselol (3) .....                                                                                                | 23 |
| <b>Figure S18.</b> HMBC spectrum (CDCl <sub>3</sub> ) of feselol (3) .....                                                                                                | 24 |
| <b>Figure S19.</b> NOESY spectrum (CDCl <sub>3</sub> ) of feselol (3) .....                                                                                               | 25 |
| <b>Figure S20.</b> <sup>1</sup> H-NMR spectrum (500 MHz, CDCl <sub>3</sub> ) of badrakemone (4) .....                                                                     | 26 |
| <b>Figure S21.</b> <sup>13</sup> C-NMR spectrum (125 MHz, CDCl <sub>3</sub> ) of badrakemone (4).....                                                                     | 27 |
| <b>Figure S22.</b> <sup>1</sup> H- <sup>1</sup> H COSY spectrum (CDCl <sub>3</sub> ) of badrakemone (4).....                                                              | 28 |
| <b>Figure S23.</b> HSQC spectrum (CDCl <sub>3</sub> ) of badrakemone (4) .....                                                                                            | 29 |
| <b>Figure S24.</b> HMBC spectrum (CDCl <sub>3</sub> ) of badrakemone (4) .....                                                                                            | 30 |
| <b>Figure S25.</b> NOESY spectrum (CDCl <sub>3</sub> ) of badrakemone (4).....                                                                                            | 31 |
| <b>Figure S26.</b> <sup>1</sup> H-NMR spectrum (500 MHz, CDCl <sub>3</sub> ) of mogoltadone (5).....                                                                      | 32 |
| <b>Figure S27.</b> <sup>13</sup> C-NMR (APT) spectrum (125 MHz, CDCl <sub>3</sub> ) of mogoltadone (5) .....                                                              | 33 |
| <b>Figure S28.</b> <sup>1</sup> H- <sup>1</sup> H COSY spectrum (CDCl <sub>3</sub> ) of mogoltadone (5).....                                                              | 34 |
| <b>Figure S29.</b> HSQC spectrum (CDCl <sub>3</sub> ) of mogoltadone (5) .....                                                                                            | 35 |
| <b>Figure S30.</b> HMBC spectrum (CDCl <sub>3</sub> ) of mogoltadone (5) .....                                                                                            | 36 |
| <b>Figure S31.</b> NOESY spectrum (CDCl <sub>3</sub> ) of mogoltadone (5).....                                                                                            | 37 |
| <b>Figure S32.</b> <sup>1</sup> H-NMR spectrum (500 MHz, CDCl <sub>3</sub> ) of farnesiferol A (6) .....                                                                  | 38 |
| <b>Figure S33.</b> <sup>13</sup> C-NMR spectrum (125 MHz, CDCl <sub>3</sub> ) of farnesiferol A (6).....                                                                  | 39 |
| <b>Figure S34.</b> <sup>1</sup> H- <sup>1</sup> H COSY spectrum (CDCl <sub>3</sub> ) of farnesiferol A (6).....                                                           | 40 |
| <b>Figure S35.</b> HSQC spectrum (CDCl <sub>3</sub> ) of farnesiferol A (6) .....                                                                                         | 41 |
| <b>Figure S36.</b> HMBC spectrum (CDCl <sub>3</sub> ) of farnesiferol A (6) .....                                                                                         | 42 |

|                                                                                                                          |    |
|--------------------------------------------------------------------------------------------------------------------------|----|
| <b>Figure S37.</b> NOESY spectrum (CDCl <sub>3</sub> ) of farnesiferol A (6) .....                                       | 43 |
| <b>Figure S38.</b> <sup>1</sup> H-NMR spectrum (500 MHz, CDCl <sub>3</sub> ) of farnesiferol A acetate (7) .....         | 44 |
| <b>Figure S39.</b> <sup>13</sup> C-NMR spectrum (125 MHz, CDCl <sub>3</sub> ) of farnesiferol A acetate (7) .....        | 45 |
| <b>Figure S40.</b> <sup>1</sup> H- <sup>1</sup> H COSY spectrum (CDCl <sub>3</sub> ) of farnesiferol A acetate (7) ..... | 46 |
| <b>Figure S41.</b> HSQC spectrum (CDCl <sub>3</sub> ) of farnesiferol A acetate (7) .....                                | 47 |
| <b>Figure S42.</b> HMBC spectrum (CDCl <sub>3</sub> ) of farnesiferol A acetate (7) .....                                | 48 |
| <b>Figure S43.</b> NOESY spectrum (CDCl <sub>3</sub> ) of farnesiferol A acetate (7) .....                               | 49 |
| <b>Figure S44.</b> <sup>1</sup> H-NMR spectrum (500 MHz, CDCl <sub>3</sub> ) of gummosin (8) .....                       | 50 |
| <b>Figure S45.</b> <sup>13</sup> C-NMR (APT) spectrum (125 MHz, CDCl <sub>3</sub> ) of gummosin (8) .....                | 51 |
| <b>Figure S46.</b> <sup>1</sup> H- <sup>1</sup> H COSY spectrum (CDCl <sub>3</sub> ) of gummosin (8) .....               | 52 |
| <b>Figure S47.</b> HSQC spectrum (CDCl <sub>3</sub> ) of gummosin (8) .....                                              | 53 |
| <b>Figure S48.</b> HMBC spectrum (CDCl <sub>3</sub> ) of gummosin (8) .....                                              | 54 |
| <b>Figure S49.</b> NOESY spectrum (CDCl <sub>3</sub> ) of gummosin (8) .....                                             | 55 |
| <b>Figure S50.</b> <sup>1</sup> H-NMR spectrum (500 MHz, CDCl <sub>3</sub> ) of ferukrin (9) .....                       | 56 |
| <b>Figure S51.</b> <sup>13</sup> C-NMR spectrum (125 MHz, CDCl <sub>3</sub> ) of ferukrin (9) .....                      | 57 |
| <b>Figure S52.</b> <sup>1</sup> H- <sup>1</sup> H COSY spectrum (CDCl <sub>3</sub> ) of ferukrin (9) .....               | 58 |
| <b>Figure S53.</b> HSQC spectrum (CDCl <sub>3</sub> ) of ferukrin (9) .....                                              | 59 |
| <b>Figure S54.</b> HMBC spectrum (CDCl <sub>3</sub> ) of ferukrin (9) .....                                              | 60 |
| <b>Figure S55.</b> NOESY spectrum (CDCl <sub>3</sub> ) of ferukrin (9) .....                                             | 61 |
| <b>Figure S56.</b> <sup>1</sup> H-NMR spectrum (500 MHz, CDCl <sub>3</sub> ) of ferukrin acetate (10) .....              | 62 |
| <b>Figure S57.</b> <sup>13</sup> C-NMR spectrum (125 MHz, CDCl <sub>3</sub> ) of ferukrin acetate (10) .....             | 63 |
| <b>Figure S58.</b> <sup>1</sup> H- <sup>1</sup> H COSY spectrum (CDCl <sub>3</sub> ) of ferukrin acetate (10) .....      | 64 |
| <b>Figure S59.</b> HSQC spectrum (CDCl <sub>3</sub> ) of ferukrin acetate (10) .....                                     | 65 |
| <b>Figure S60.</b> HMBC spectrum (CDCl <sub>3</sub> ) of ferukrin acetate (10) .....                                     | 66 |
| <b>Figure S61.</b> NOESY spectrum (CDCl <sub>3</sub> ) of ferukrin acetate (10) .....                                    | 67 |
| <b>Figure S62.</b> <sup>1</sup> H-NMR spectrum (500 MHz, CDCl <sub>3</sub> ) of deacetylkellerin (11) .....              | 68 |
| <b>Figure S63.</b> <sup>13</sup> C-NMR (APT) spectrum (125 MHz, CDCl <sub>3</sub> ) of deacetylkellerin (11) .....       | 69 |
| <b>Figure S64.</b> <sup>1</sup> H- <sup>1</sup> H COSY spectrum (CDCl <sub>3</sub> ) of deacetylkellerin (11) .....      | 70 |
| <b>Figure S65.</b> HSQC spectrum (CDCl <sub>3</sub> ) of deacetylkellerin (11) .....                                     | 71 |
| <b>Figure S66.</b> HMBC spectrum (CDCl <sub>3</sub> ) of deacetylkellerin (11) .....                                     | 72 |
| <b>Figure S67.</b> NOESY spectrum (CDCl <sub>3</sub> ) of deacetylkellerin (11) .....                                    | 73 |
| <b>Figure S68.</b> <sup>1</sup> H-NMR spectrum (500 MHz, CDCl <sub>3</sub> ) of kellerin (12) .....                      | 74 |
| <b>Figure S69.</b> <sup>13</sup> C-NMR (APT) spectrum (125 MHz, CDCl <sub>3</sub> ) of kellerin (12) .....               | 75 |
| <b>Figure S70.</b> <sup>1</sup> H- <sup>1</sup> H COSY spectrum (CDCl <sub>3</sub> ) of kellerin (12) .....              | 76 |
| <b>Figure S71.</b> HSQC spectrum (CDCl <sub>3</sub> ) of kellerin (12) .....                                             | 77 |
| <b>Figure S72.</b> HMBC spectrum (CDCl <sub>3</sub> ) of kellerin (12) .....                                             | 78 |
| <b>Figure S73.</b> NOESY spectrum (CDCl <sub>3</sub> ) of kellerin (12) .....                                            | 79 |
| <b>Figure S74.</b> <sup>1</sup> H-NMR spectrum (500 MHz, CDCl <sub>3</sub> ) of samarcandone (13) .....                  | 80 |
| <b>Figure S75.</b> <sup>13</sup> C-NMR (APT) spectrum (125 MHz, CDCl <sub>3</sub> ) of samarcandone (13) .....           | 81 |

|                                                                                                                                                                                                                                                                                                                                                                                                                        |     |
|------------------------------------------------------------------------------------------------------------------------------------------------------------------------------------------------------------------------------------------------------------------------------------------------------------------------------------------------------------------------------------------------------------------------|-----|
| <b>Figure S76.</b> $^1\text{H}$ - $^1\text{H}$ COSY spectrum ( $\text{CDCl}_3$ ) of samarcandone (13) .....                                                                                                                                                                                                                                                                                                            | 82  |
| <b>Figure S77.</b> HSQC spectrum ( $\text{CDCl}_3$ ) of samarcandone (13) .....                                                                                                                                                                                                                                                                                                                                        | 83  |
| <b>Figure S78.</b> HMBC spectrum ( $\text{CDCl}_3$ ) of samarcandone (13) .....                                                                                                                                                                                                                                                                                                                                        | 84  |
| <b>Figure S79.</b> NOESY spectrum ( $\text{CDCl}_3$ ) of samarcandone (13) .....                                                                                                                                                                                                                                                                                                                                       | 85  |
| <b>Figure S80.</b> $^1\text{H}$ -NMR spectrum (500 MHz, $\text{CDCl}_3$ ) of samarcandin (14) .....                                                                                                                                                                                                                                                                                                                    | 86  |
| <b>Figure S81.</b> $^{13}\text{C}$ -NMR spectrum (125 MHz, $\text{CDCl}_3$ ) of samarcandin (14) .....                                                                                                                                                                                                                                                                                                                 | 87  |
| <b>Figure S82.</b> $^1\text{H}$ - $^1\text{H}$ COSY spectrum ( $\text{CDCl}_3$ ) of samarcandin (14) .....                                                                                                                                                                                                                                                                                                             | 88  |
| <b>Figure S83.</b> HSQC spectrum ( $\text{CDCl}_3$ ) of samarcandin (14) .....                                                                                                                                                                                                                                                                                                                                         | 89  |
| <b>Figure S84.</b> HMBC spectrum ( $\text{CDCl}_3$ ) of samarcandin (14) .....                                                                                                                                                                                                                                                                                                                                         | 90  |
| <b>Figure S85.</b> NOESY spectrum ( $\text{CDCl}_3$ ) of samarcandin (14) .....                                                                                                                                                                                                                                                                                                                                        | 91  |
| <b>Figure S86.</b> $^1\text{H}$ -NMR spectrum (500 MHz, $\text{CDCl}_3$ ) of samarcandin acetate (15) .....                                                                                                                                                                                                                                                                                                            | 92  |
| <b>Figure S87.</b> $^{13}\text{C}$ -NMR (APT) spectrum (125 MHz, $\text{CDCl}_3$ ) of samarcandin acetate (15) .....                                                                                                                                                                                                                                                                                                   | 93  |
| <b>Figure S88.</b> $^1\text{H}$ - $^1\text{H}$ COSY spectrum ( $\text{CDCl}_3$ ) of samarcandin acetate (15) .....                                                                                                                                                                                                                                                                                                     | 94  |
| <b>Figure S89.</b> HSQC spectrum ( $\text{CDCl}_3$ ) of samarcandin acetate (15) .....                                                                                                                                                                                                                                                                                                                                 | 95  |
| <b>Figure S90.</b> HMBC spectrum ( $\text{CDCl}_3$ ) of samarcandin acetate (15) .....                                                                                                                                                                                                                                                                                                                                 | 96  |
| <b>Figure S91.</b> NOESY spectrum ( $\text{CDCl}_3$ ) of samarcandin acetate (15) .....                                                                                                                                                                                                                                                                                                                                | 97  |
| <b>Figure S92.</b> Chemical transformations of the cytotoxic sesquiterpene coumarins of <i>Ferula huber-morathii</i> .....                                                                                                                                                                                                                                                                                             | 98  |
| <b>Figure S93.</b> Comparison of $^1\text{H}$ -NMR spectra of isosamarcandin (16) and ferukrin (9) .....                                                                                                                                                                                                                                                                                                               | 99  |
| <b>Figure S94.</b> Previously proposed structures of sesquiterpene compounds isolated from the chloroform extract of <i>Ferula huber-morathii</i> [3] .....                                                                                                                                                                                                                                                            | 100 |
| <b>Figure S95.</b> TLC comparison of the dichloromethane extracts of <i>Ferula huber-morathii</i> with reference compounds; elaeochytrin A (18) and ferutinin (17), and isolated sesquiterpene coumarins (1-15), mobile phase; Hxn:EtOAc (6:4), detection; A: 254 nm; B: 366 nm; C: Anisaldehyde reagent .....                                                                                                         | 101 |
| <b>Figure S96.</b> A. HPLC chromatogram of the dichloromethane root extract of <i>Ferula huber-morathii</i> spiked with reference compounds ferutinin (17) and elaeochytrin A (18), B. HPLC chromatogram of the dichloromethane root extract of <i>F. huber-morathii</i> and C. HPLC chromatogram of the mixture of reference compounds ferutinin (17) and elaeochytrin A (18). Detection: UV detector at 259 nm ..... | 102 |
| <b>Figure S97.</b> $^1\text{H}$ -NMR spectrum (500 MHz, $\text{CDCl}_3$ ) of reference compound ferutinin (17) .....                                                                                                                                                                                                                                                                                                   | 105 |
| <b>Figure S98.</b> $^1\text{H}$ -NMR spectrum (500 MHz, $\text{CDCl}_3$ ) of reference compound elaeochytrin A (18) .....                                                                                                                                                                                                                                                                                              | 107 |
| <b>Figure S99.</b> Preparation of the ( <i>R</i> )-MTPA ester of samarcandin (24) and structure of <i>ent</i> -samarcandin (23) .....                                                                                                                                                                                                                                                                                  | 108 |



|                                                                                                                                                                                                             |     |
|-------------------------------------------------------------------------------------------------------------------------------------------------------------------------------------------------------------|-----|
| <b>Figure S100.</b> $^1\text{H}$ -NMR spectrum (500 MHz, $\text{CDCl}_3$ ) of ( <i>R</i> )-MTPA ester of samarcandin (24) .....                                                                             | 110 |
| <b>Figure S101.</b> $^{13}\text{C}$ -NMR spectrum (125 MHz, $\text{CDCl}_3$ ) of ( <i>R</i> )-MTPA ester of samarcandin (24) .....                                                                          | 112 |
| <b>Figure S102.</b> $^1\text{H}$ - $^1\text{H}$ COSY spectrum ( $\text{CDCl}_3$ ) of ( <i>R</i> )-MTPA ester of samarcandin (24) .....                                                                      | 113 |
| <b>Figure S103.</b> HSQC spectrum of ( <i>R</i> )-MTPA ester of samarcandin (24) .....                                                                                                                      | 114 |
| <b>Figure S104.</b> HMBC spectrum of ( <i>R</i> )-MTPA ester of samarcandin (24) .....                                                                                                                      | 115 |
| <b>Figure S105.</b> NOESY spectrum of ( <i>R</i> )-MTPA ester of samarcandin (24) .....                                                                                                                     | 116 |
| <b>Figure S106.</b> (+)-HRESIMS spectrum of ( <i>R</i> )-MTPA ester of samarcandin (24) .....                                                                                                               | 117 |
| <b>Figure S107.</b> IR spectrum of ( <i>R</i> )-MTPA ester of samarcandin (24) .....                                                                                                                        | 118 |
| <b>Figure S108.</b> UV spectrum of ( <i>R</i> )-MTPA ester of samarcandin (24) .....                                                                                                                        | 119 |
| <b>Figure S109.</b> Packings of the ( <i>R</i> )-MTPA ester of samarcandin (24) in unit cell .....                                                                                                          | 120 |
| <b>Figure S110.</b> Structures of Bcl-XL and $\beta$ -Catenin ligands .....                                                                                                                                 | 122 |
| <b>Figure S111.</b> Validation of the docking models. Superposition of docked pose and experimental binding conformation (green) of Native Ligands in the binding pocket of 7AFW (left), 7LH7 (right) ..... | 123 |
| <br><b>Table S1.</b> Physical appearance and comparison of optical rotation values of isolated terpenoid coumarins with literature data .....                                                               | 7   |
| <b>Table S2.</b> Crystal data and details of the structure determination of ( <i>R</i> )-MTPA ester of samarcandin (24) .....                                                                               | 121 |

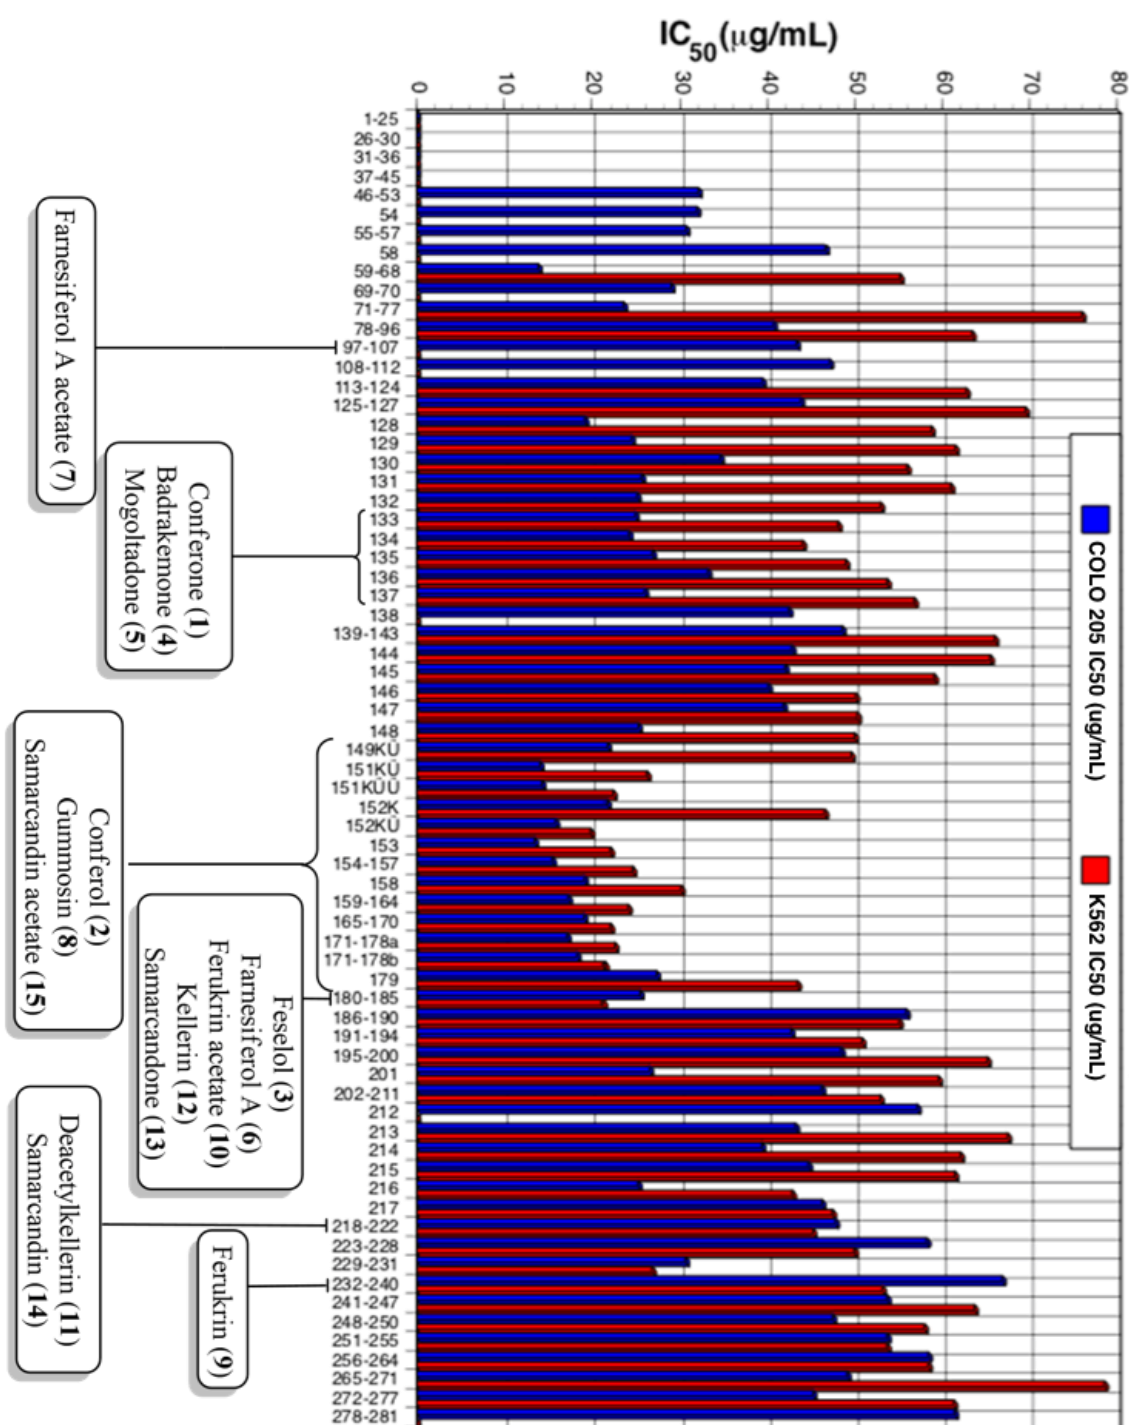

**Figure S1.** Bioactivity-guided isolation scheme for the cytotoxic sesquiterpene coumarins of the dichloromethane root extract of *Ferula huber-morathii*

**Table S1.** Physical appearance and comparison of optical rotation values of isolated terpenoid coumarins with literature data

| Compound                   | Physical appearance | Isolated Comp.                                                                        | Lit. Reference                               |      |
|----------------------------|---------------------|---------------------------------------------------------------------------------------|----------------------------------------------|------|
|                            |                     | $[\alpha]_{\text{D}}^{\text{temp.}}$ (Solv.)                                          | $[\alpha]_{\text{D}}^{\text{temp.}}$ (Solv.) | Ref. |
| Conferone (1)              | White powder        | -55.0 <sup>°24</sup> (CH <sub>2</sub> Cl <sub>2</sub> )                               | -51.0 <sup>°20</sup> (EtOH)                  | [1]  |
| Conferol (2)               | White powder        | -55.1 <sup>°24</sup> (CH <sub>2</sub> Cl <sub>2</sub> )                               | -84.2 <sup>°20</sup> (CHCl <sub>3</sub> )    | [1]  |
| Feselol (3)                | Gum                 | -60.9 <sup>°24</sup> (CH <sub>2</sub> Cl <sub>2</sub> )                               | -98.5 <sup>°20</sup> (EtOH)                  | [1]  |
| Badrekemone (4)            | White powder        | -39.7 <sup>°24</sup> (CH <sub>2</sub> Cl <sub>2</sub> )                               | -42.0 <sup>°22</sup> (CHCl <sub>3</sub> )    | [1]  |
| Mogoltadone (5)            | White powder        | -19.4 <sup>°25</sup> (CH <sub>2</sub> Cl <sub>2</sub> )                               | -41.7 <sup>°21</sup> (CHCl <sub>3</sub> )    | [1]  |
| Farnesiferol A (6)         | Gum                 | -50.1 <sup>°24</sup> (CH <sub>2</sub> Cl <sub>2</sub> )                               | -55.0 <sup>°25</sup> (CHCl <sub>3</sub> )    | [1]  |
| Farnesiferol A acetate (7) | Gum                 | -27.3 <sup>°24</sup> (CH <sub>2</sub> Cl <sub>2</sub> )                               | -55.0 <sup>°22</sup> (CHCl <sub>3</sub> )    | [2]  |
| Gummosin (8)               | Gum                 | -37.0 <sup>°24</sup> (CH <sub>2</sub> Cl <sub>2</sub> )                               | -54.0 <sup>°25</sup> (CHCl <sub>3</sub> )    | [1]  |
| Ferukrin (9)               | White powder        | +25.3 <sup>°24</sup> (CH <sub>2</sub> Cl <sub>2</sub> )                               | +30.0 <sup>°22</sup> (EtOH)                  | [1]  |
| Ferukrin acetate (10)      | White powder        | +7.6 <sup>°24</sup> (CH <sub>2</sub> Cl <sub>2</sub> )                                | +20.0 <sup>°22</sup> (EtOH)                  | [1]  |
| Deacetylkellerin (11)      | White powder        | +25.3 <sup>°24</sup> (CH <sub>2</sub> Cl <sub>2</sub> )                               | +52.0 <sup>°22</sup> (EtOH)                  | [1]  |
| Kellerin (12)              | White powder        | +63.6 <sup>°24</sup> (CH <sub>2</sub> Cl <sub>2</sub> )                               | +66.4 <sup>°20</sup> (EtOH)                  | [1]  |
| Samarcandone (13)          | White powder        | +10.0 <sup>°24</sup> (CH <sub>2</sub> Cl <sub>2</sub> )                               | +25.0 <sup>°25</sup> (EtOH)                  | [1]  |
| Samarcandin (14)           | Gum                 | +6.8 <sup>°24</sup> (CH <sub>2</sub> Cl <sub>2</sub> )                                | +30.0 <sup>°25</sup> (EtOH)                  | [1]  |
| Samarcandin acetate (15)   | Gum                 | -4.3 <sup>°24</sup> (CH <sub>2</sub> Cl <sub>2</sub> )<br>+23.9 <sup>°23</sup> (EtOH) | +29.4 <sup>°25</sup> (EtOH)                  | [1]  |

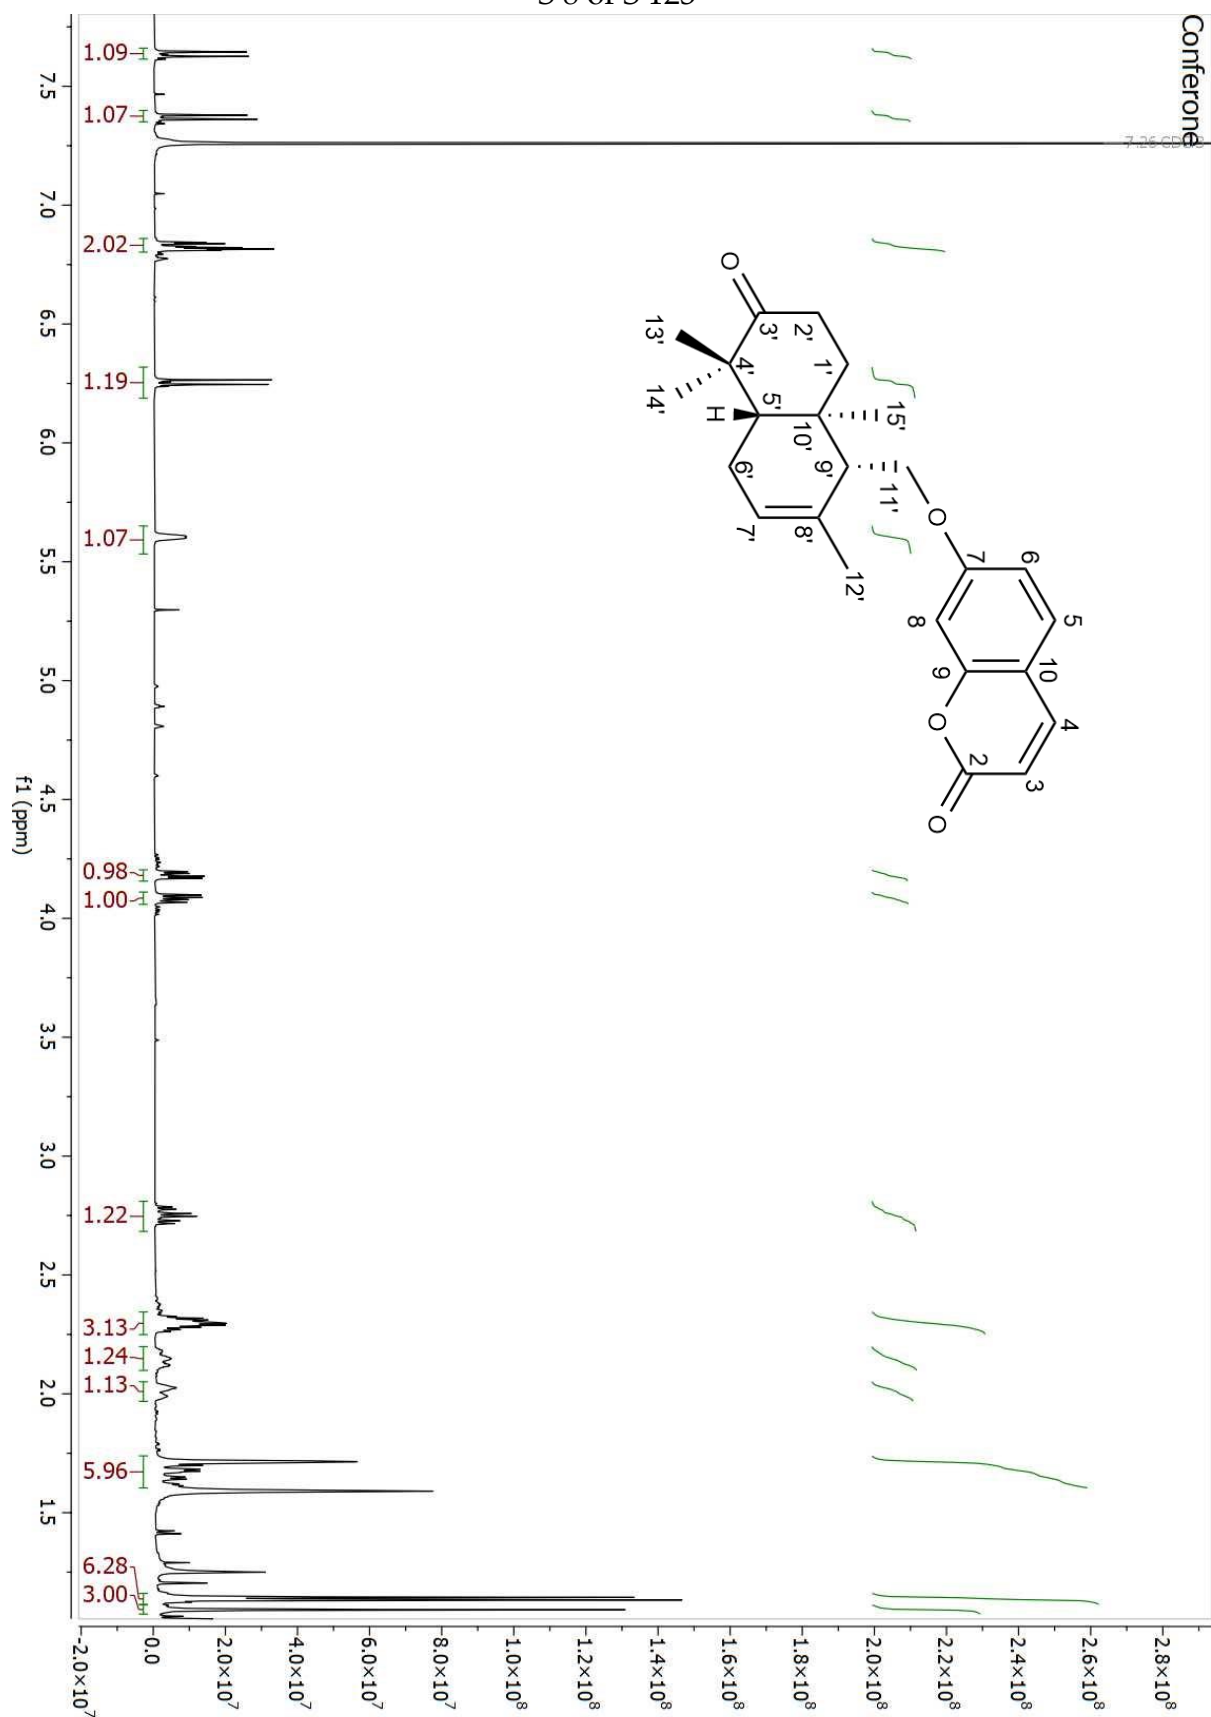

**Figure S2.** <sup>1</sup>H-NMR spectrum (500 MHz, CDCl<sub>3</sub>) of conferone (1)

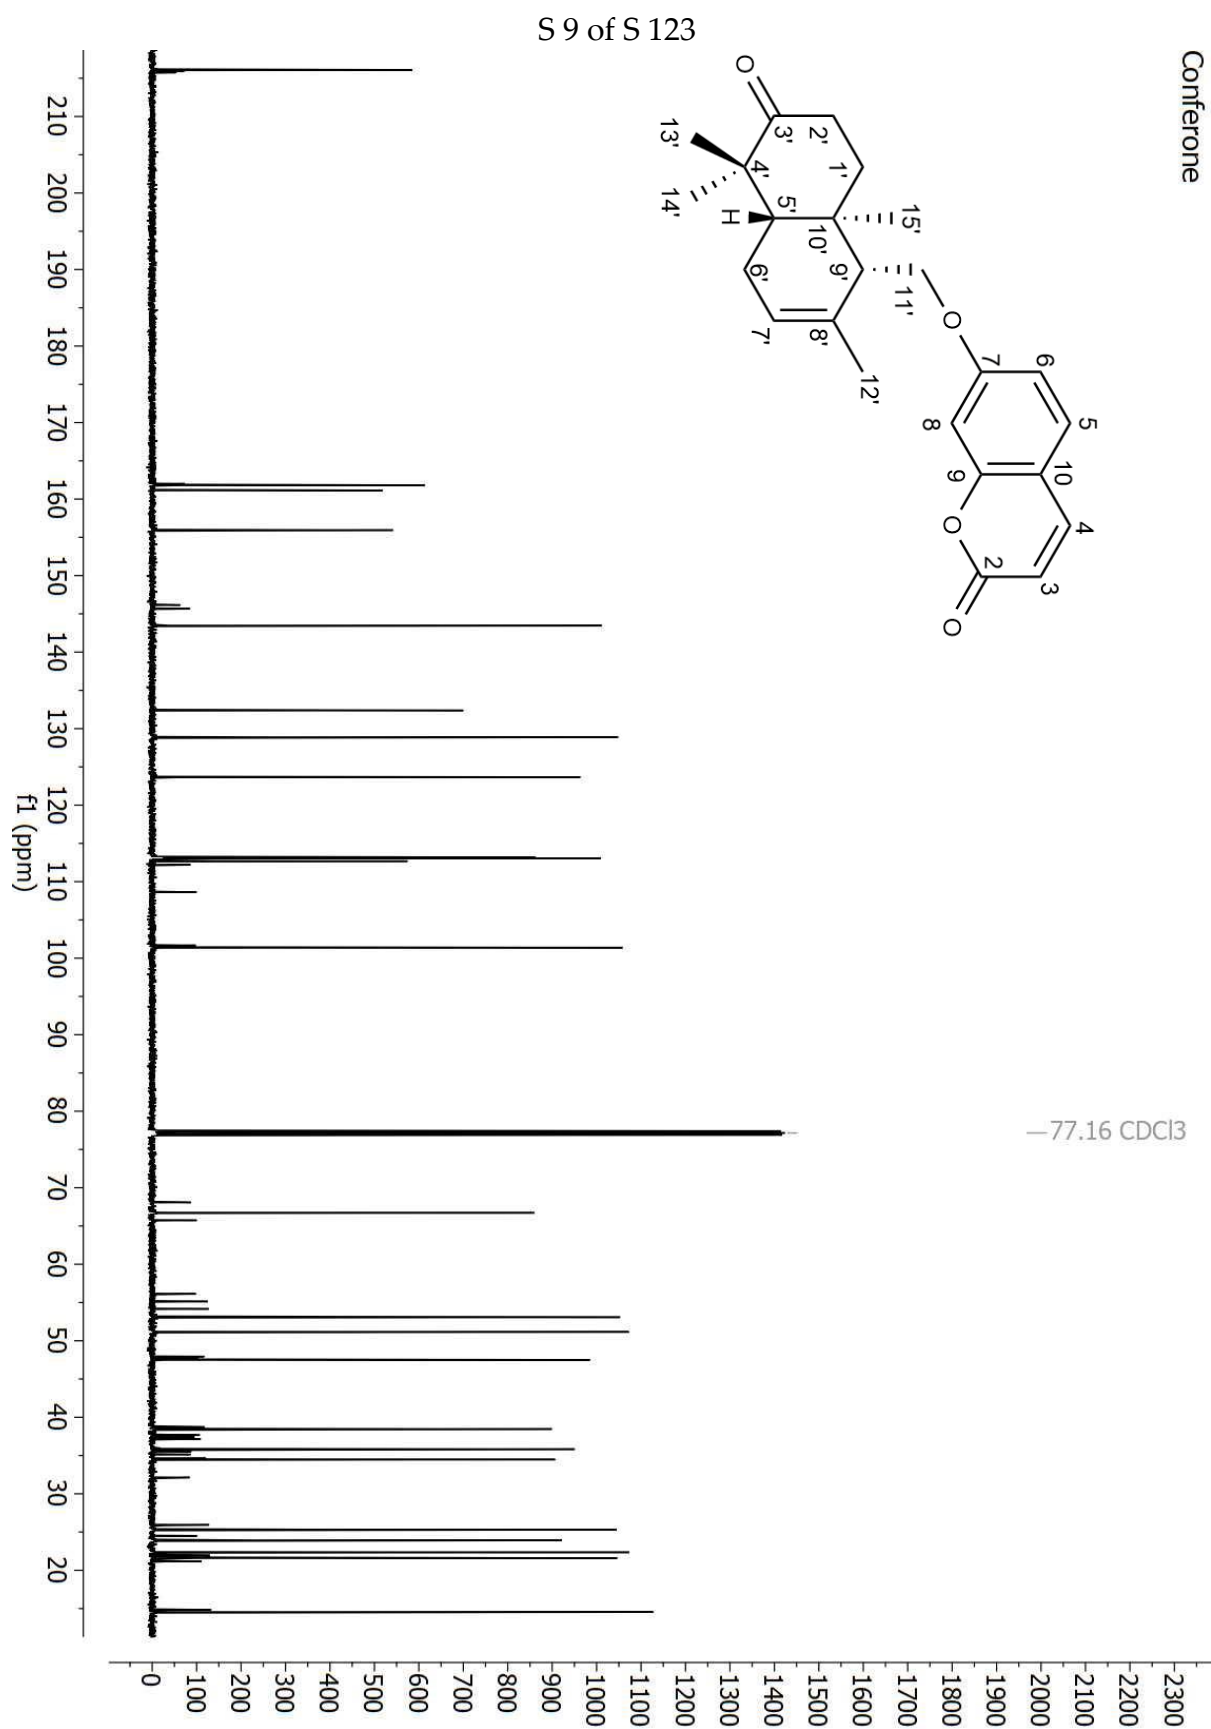

**Figure S3.**  $^{13}\text{C}$ -NMR spectrum (125 MHz,  $\text{CDCl}_3$ ) of conferone (1)

S 10 of S 123

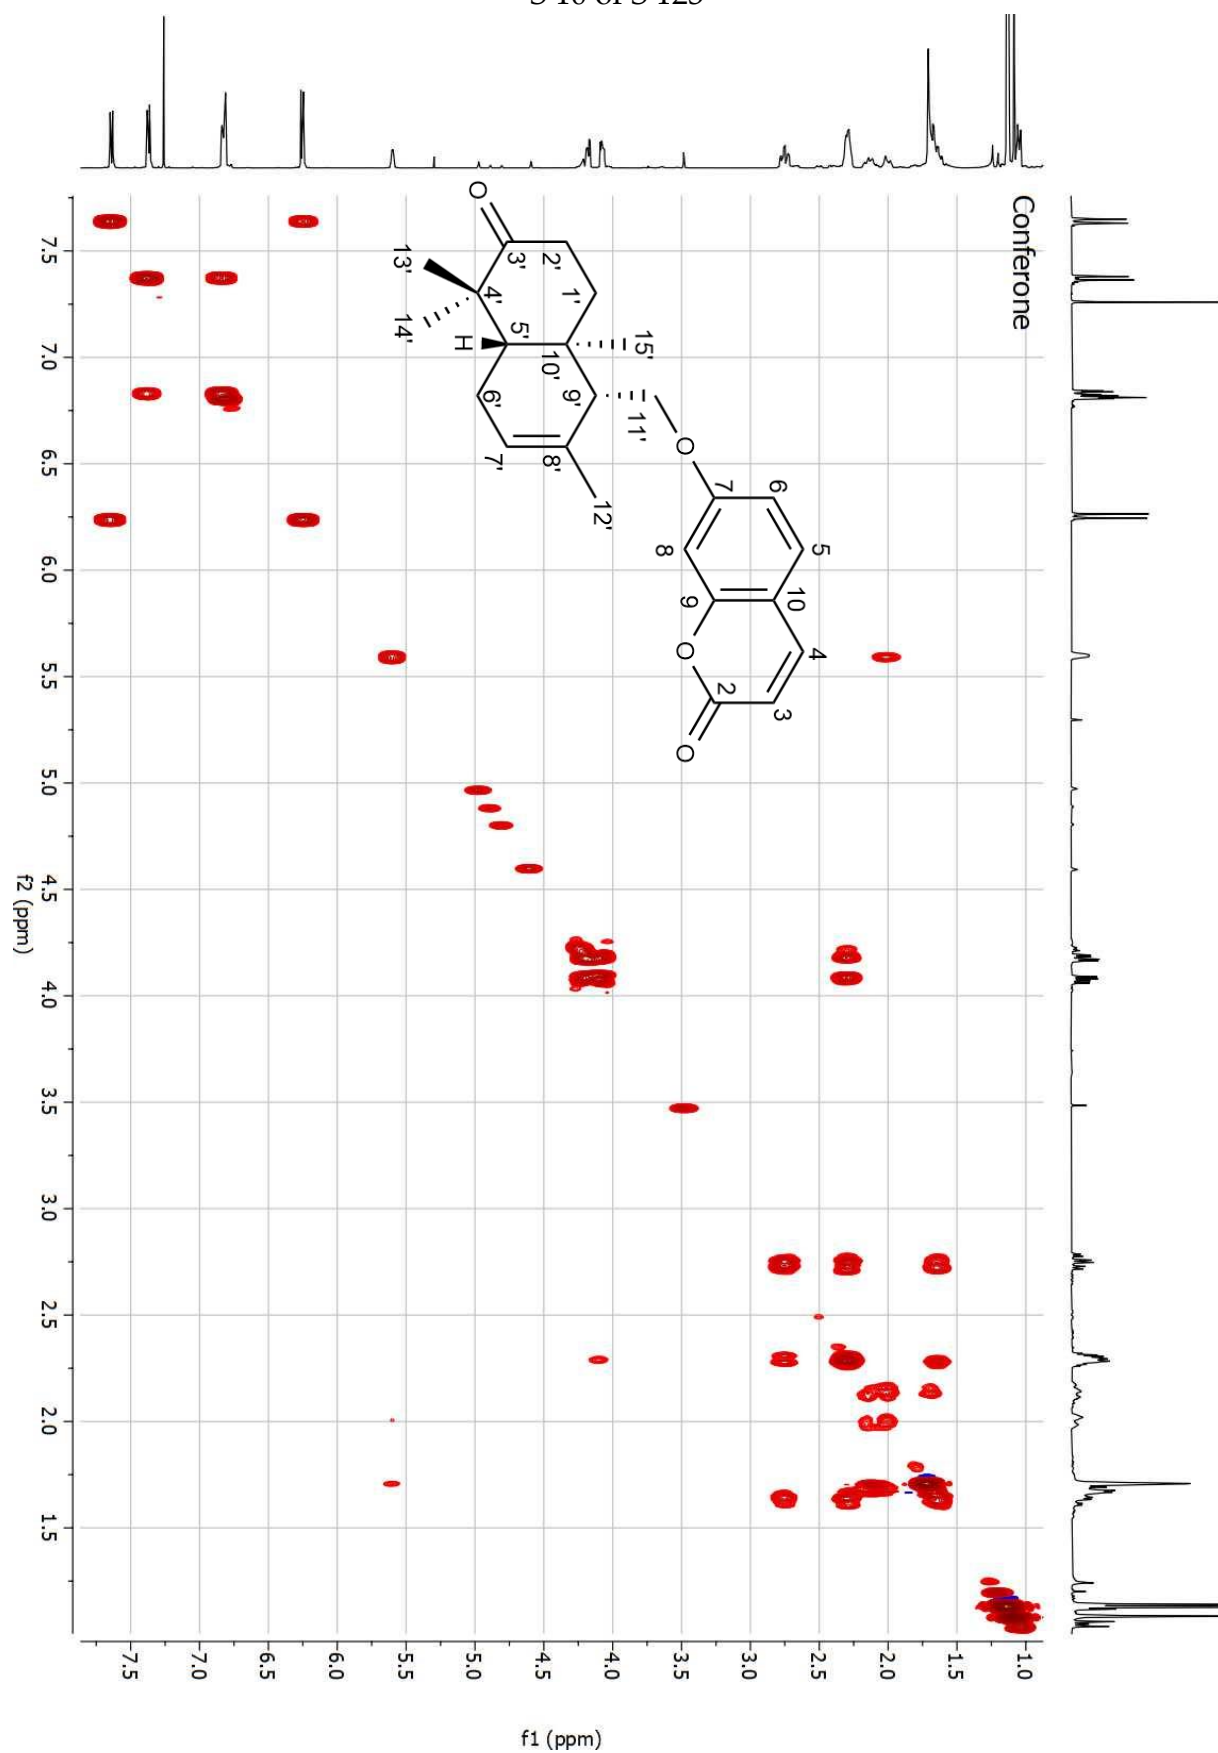**Figure S4.**  $^1\text{H}$ - $^1\text{H}$  COSY spectrum ( $\text{CDCl}_3$ ) of conferone (1)

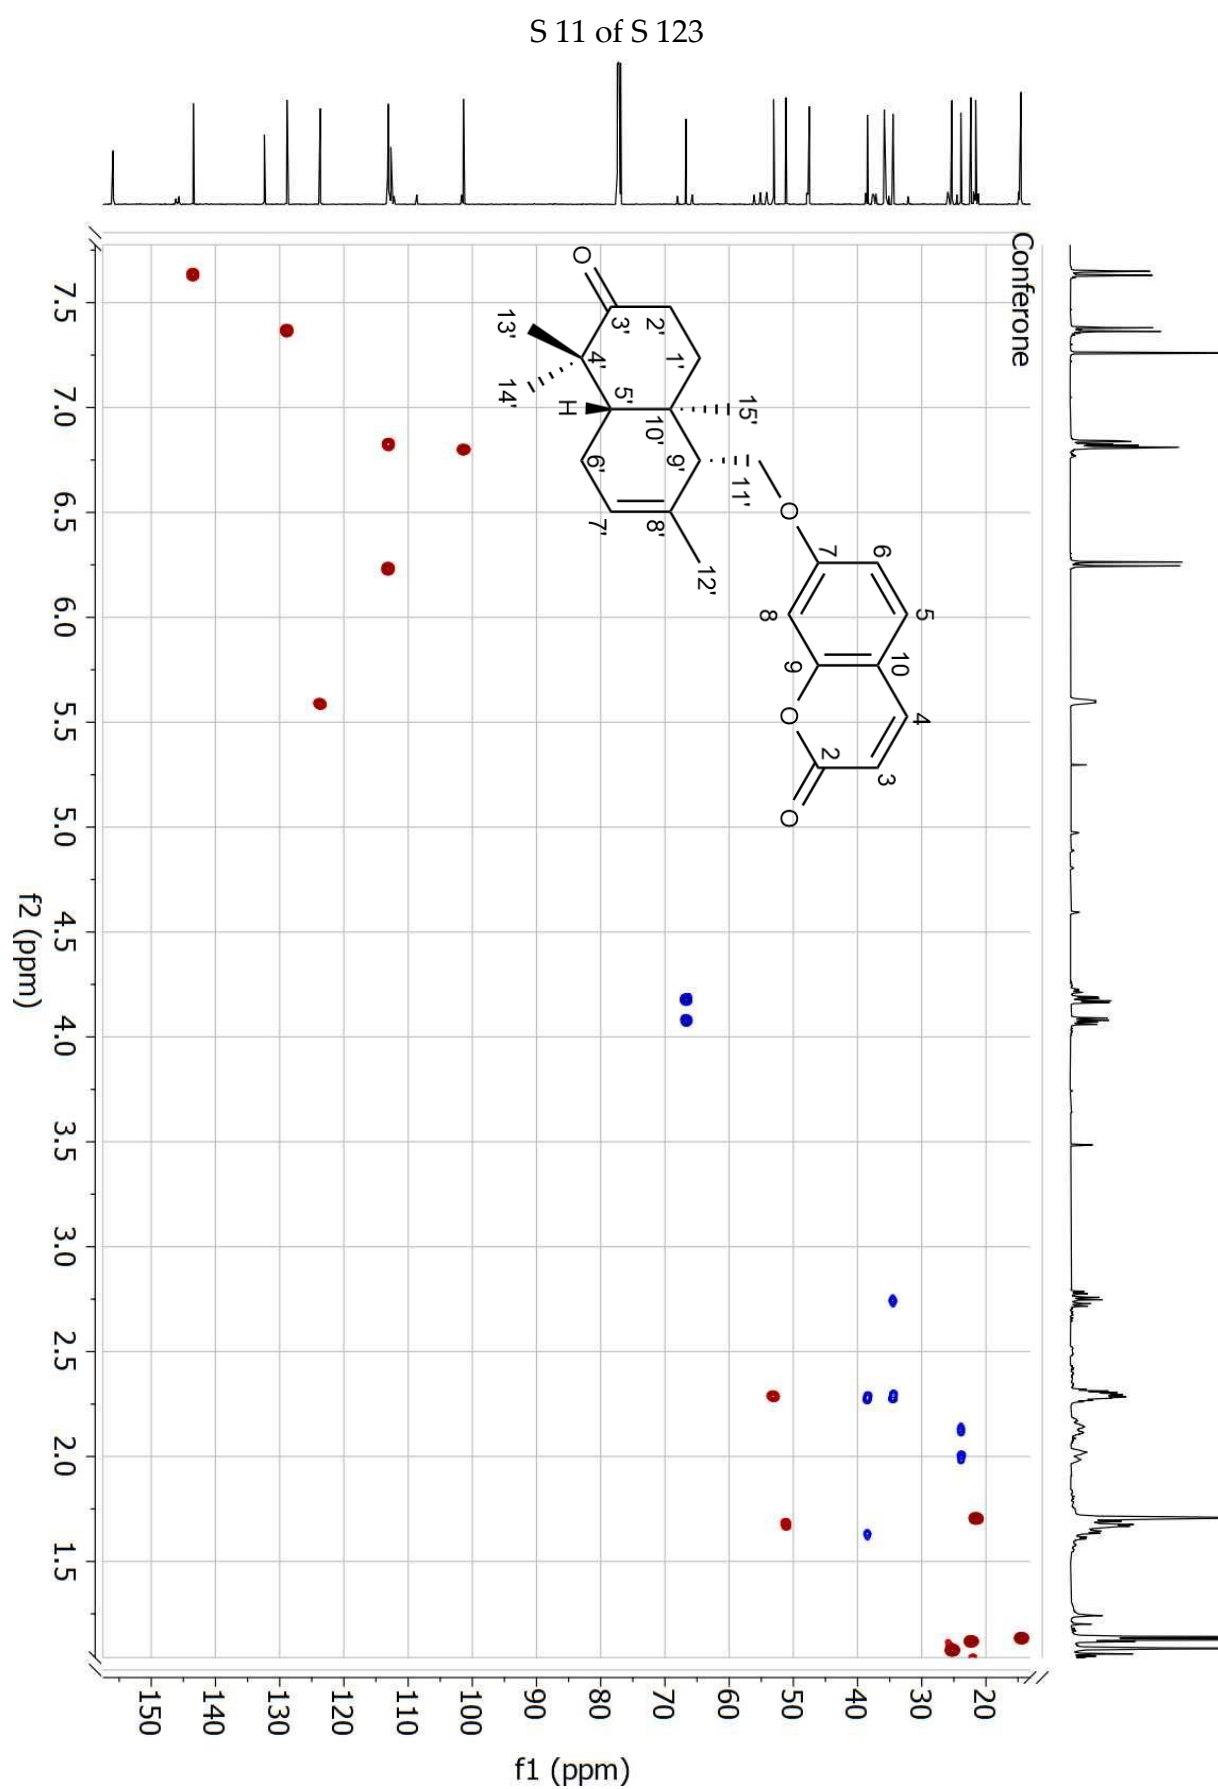

**Figure S5.** HSQC spectrum (CDCl<sub>3</sub>) of conferone (1)

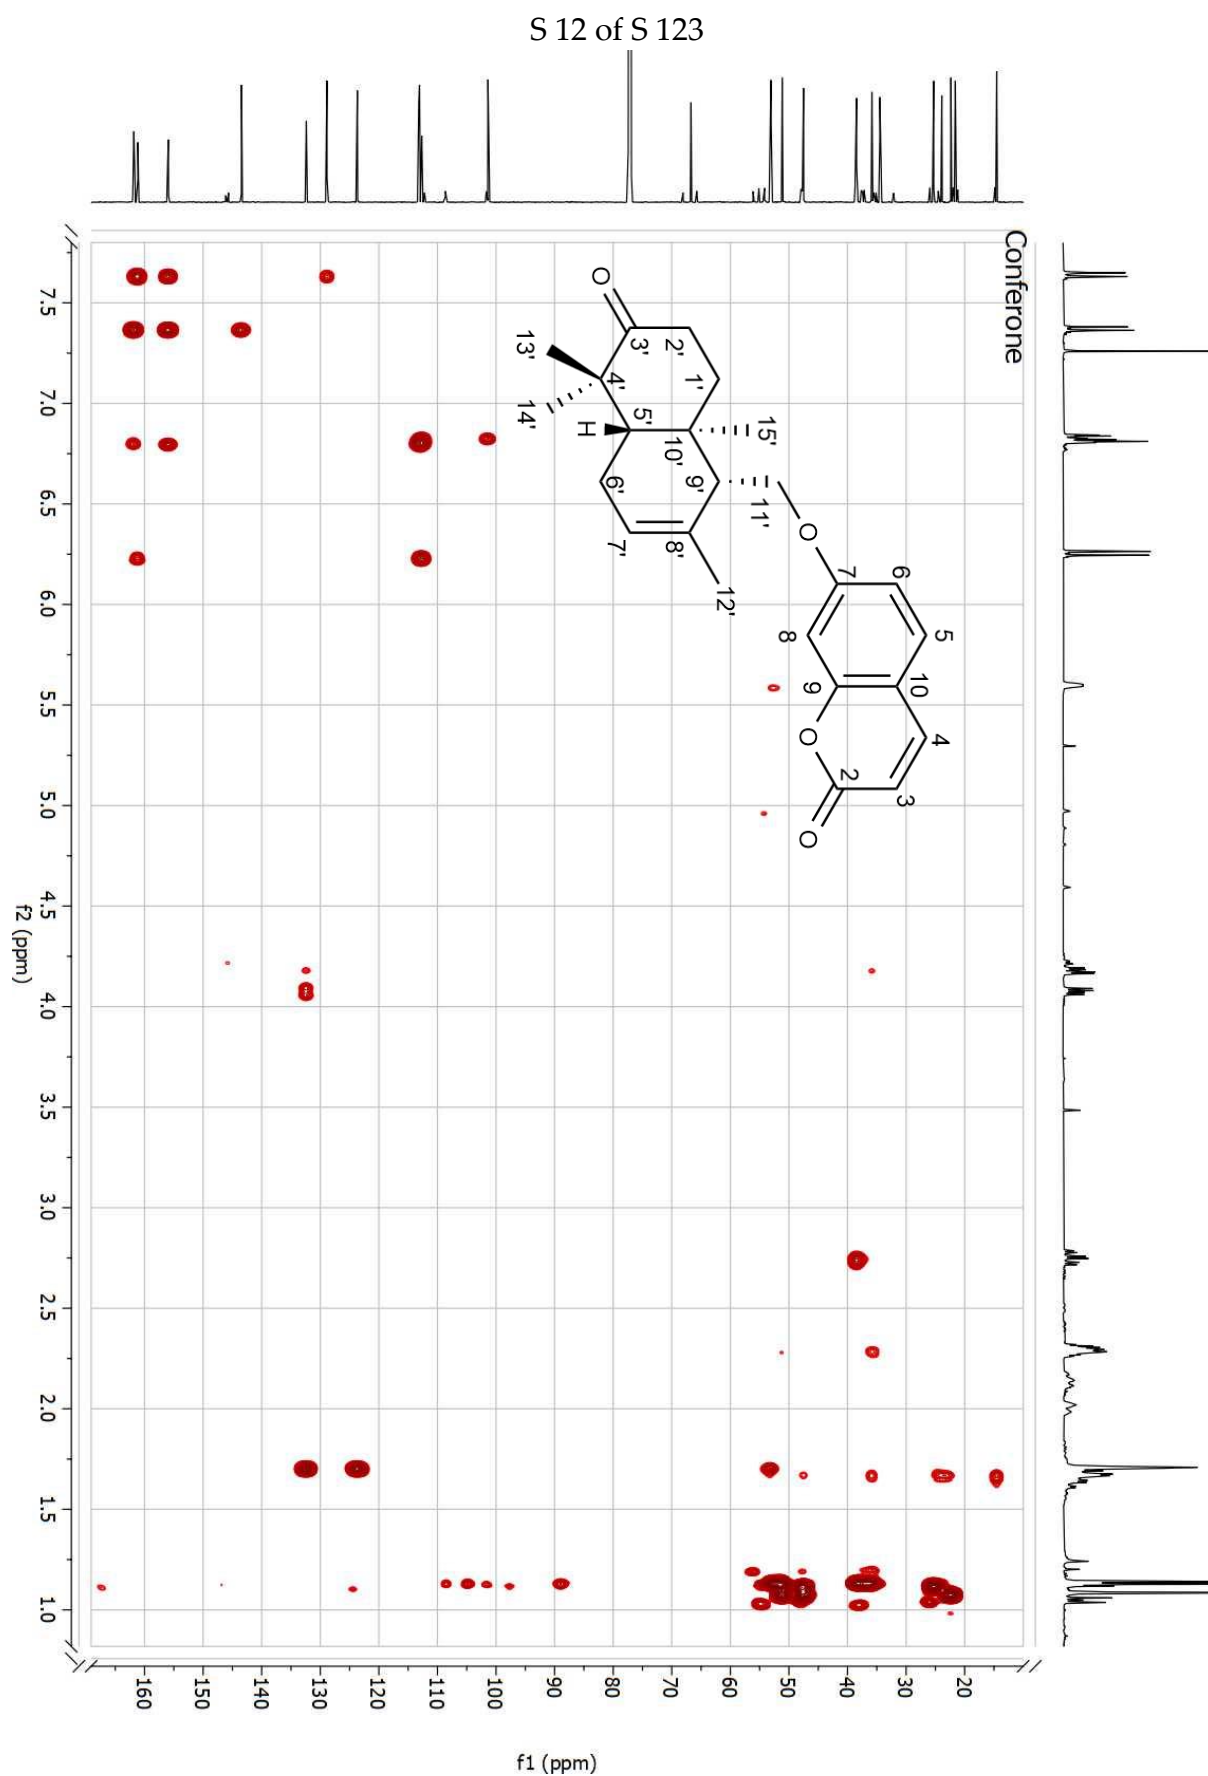

**Figure S6.** HMBC spectrum (CDCl<sub>3</sub>) of conferone (1)



S 13 of S 123

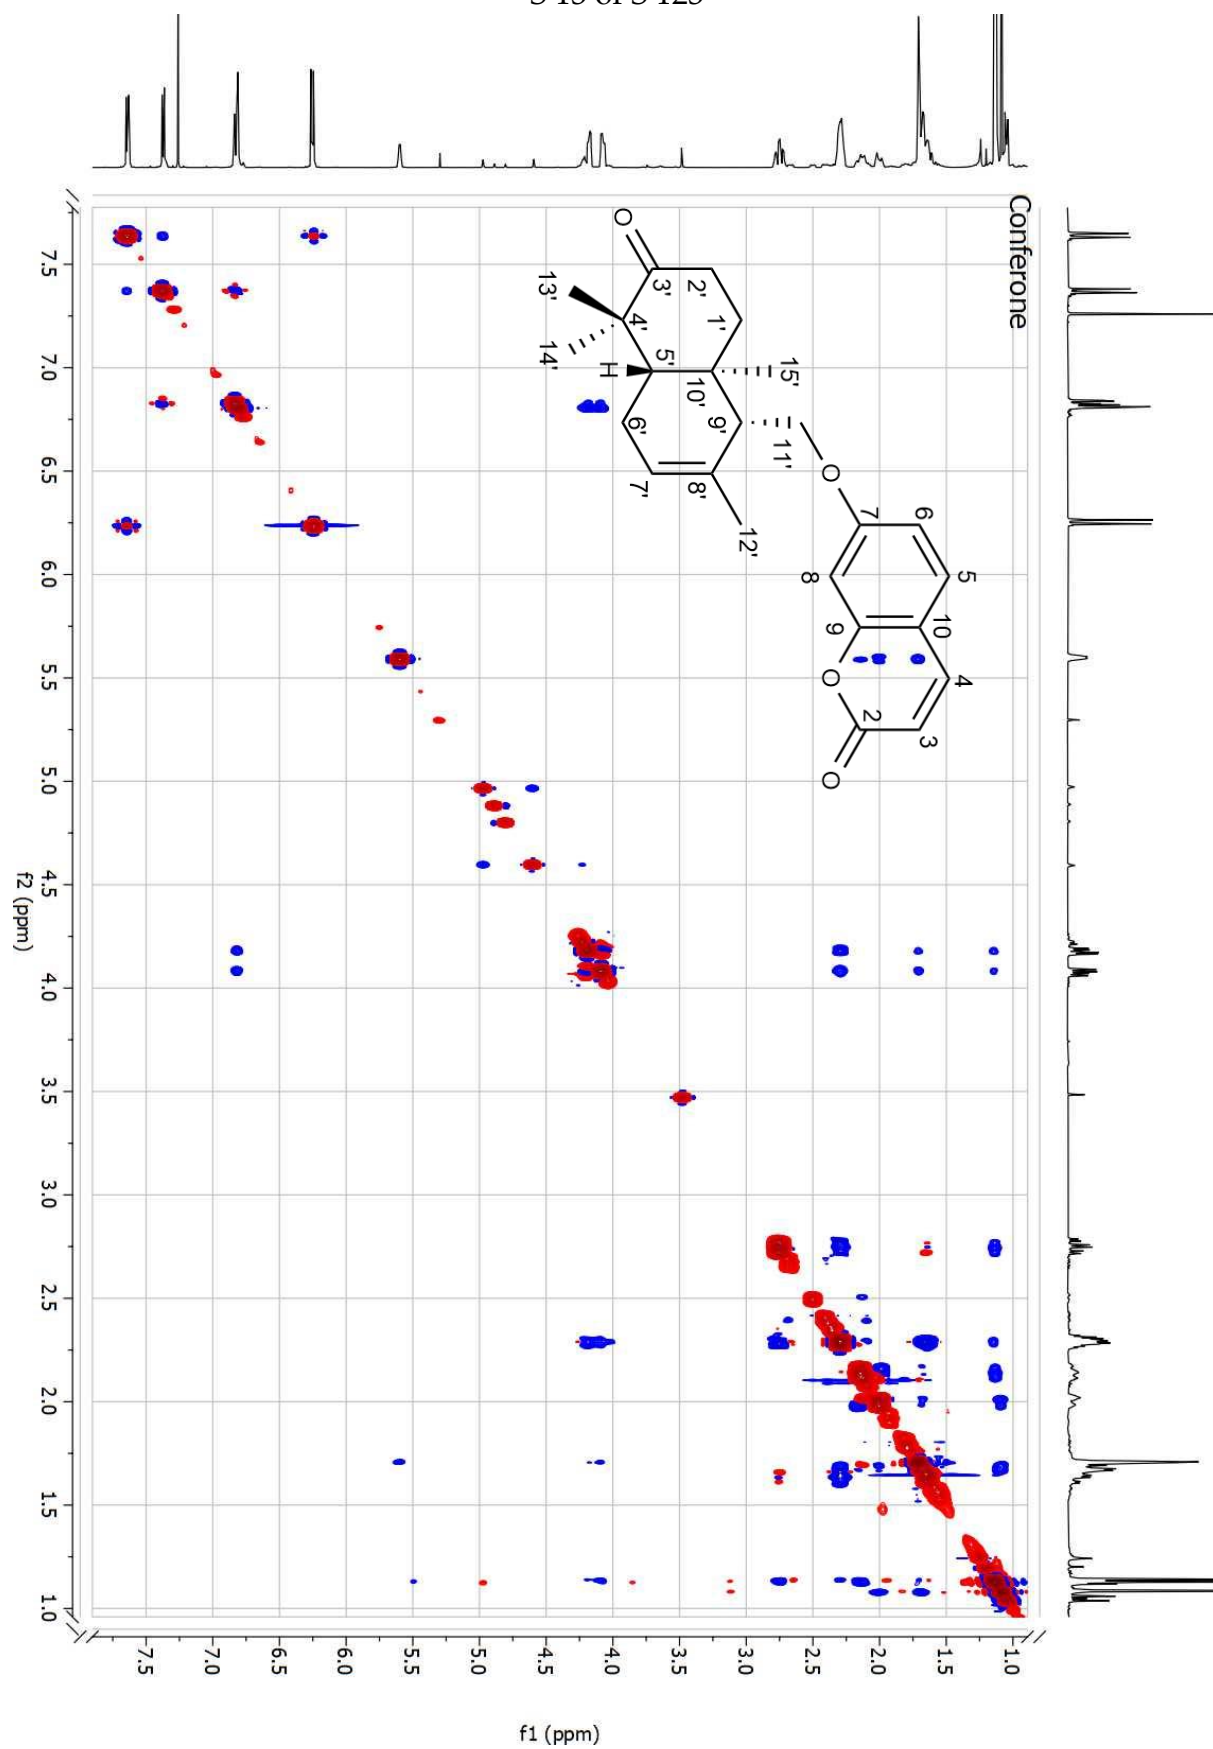**Figure S7.** NOESY spectrum (CDCl<sub>3</sub>) of conferone (**1**)

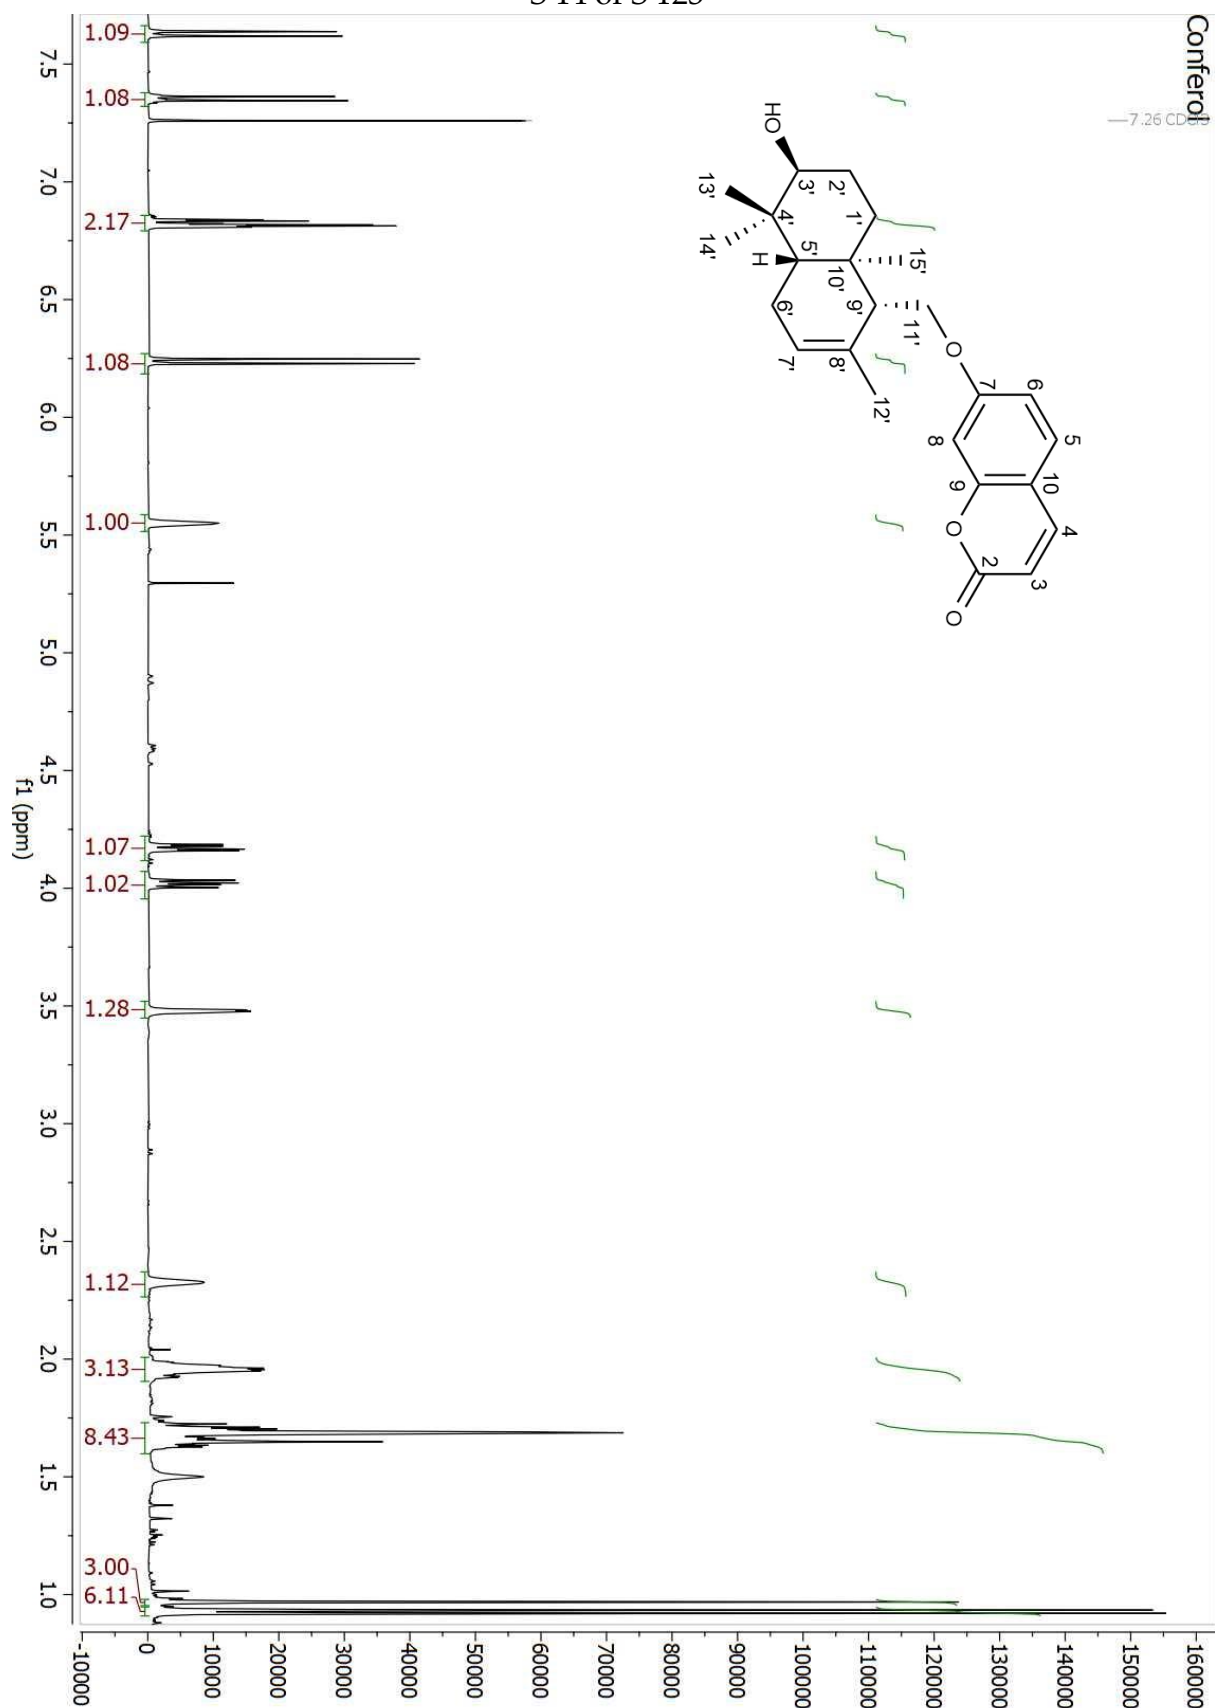

**Figure S8.** <sup>1</sup>H-NMR spectrum (500 MHz, CDCl<sub>3</sub>) of conferral (2)

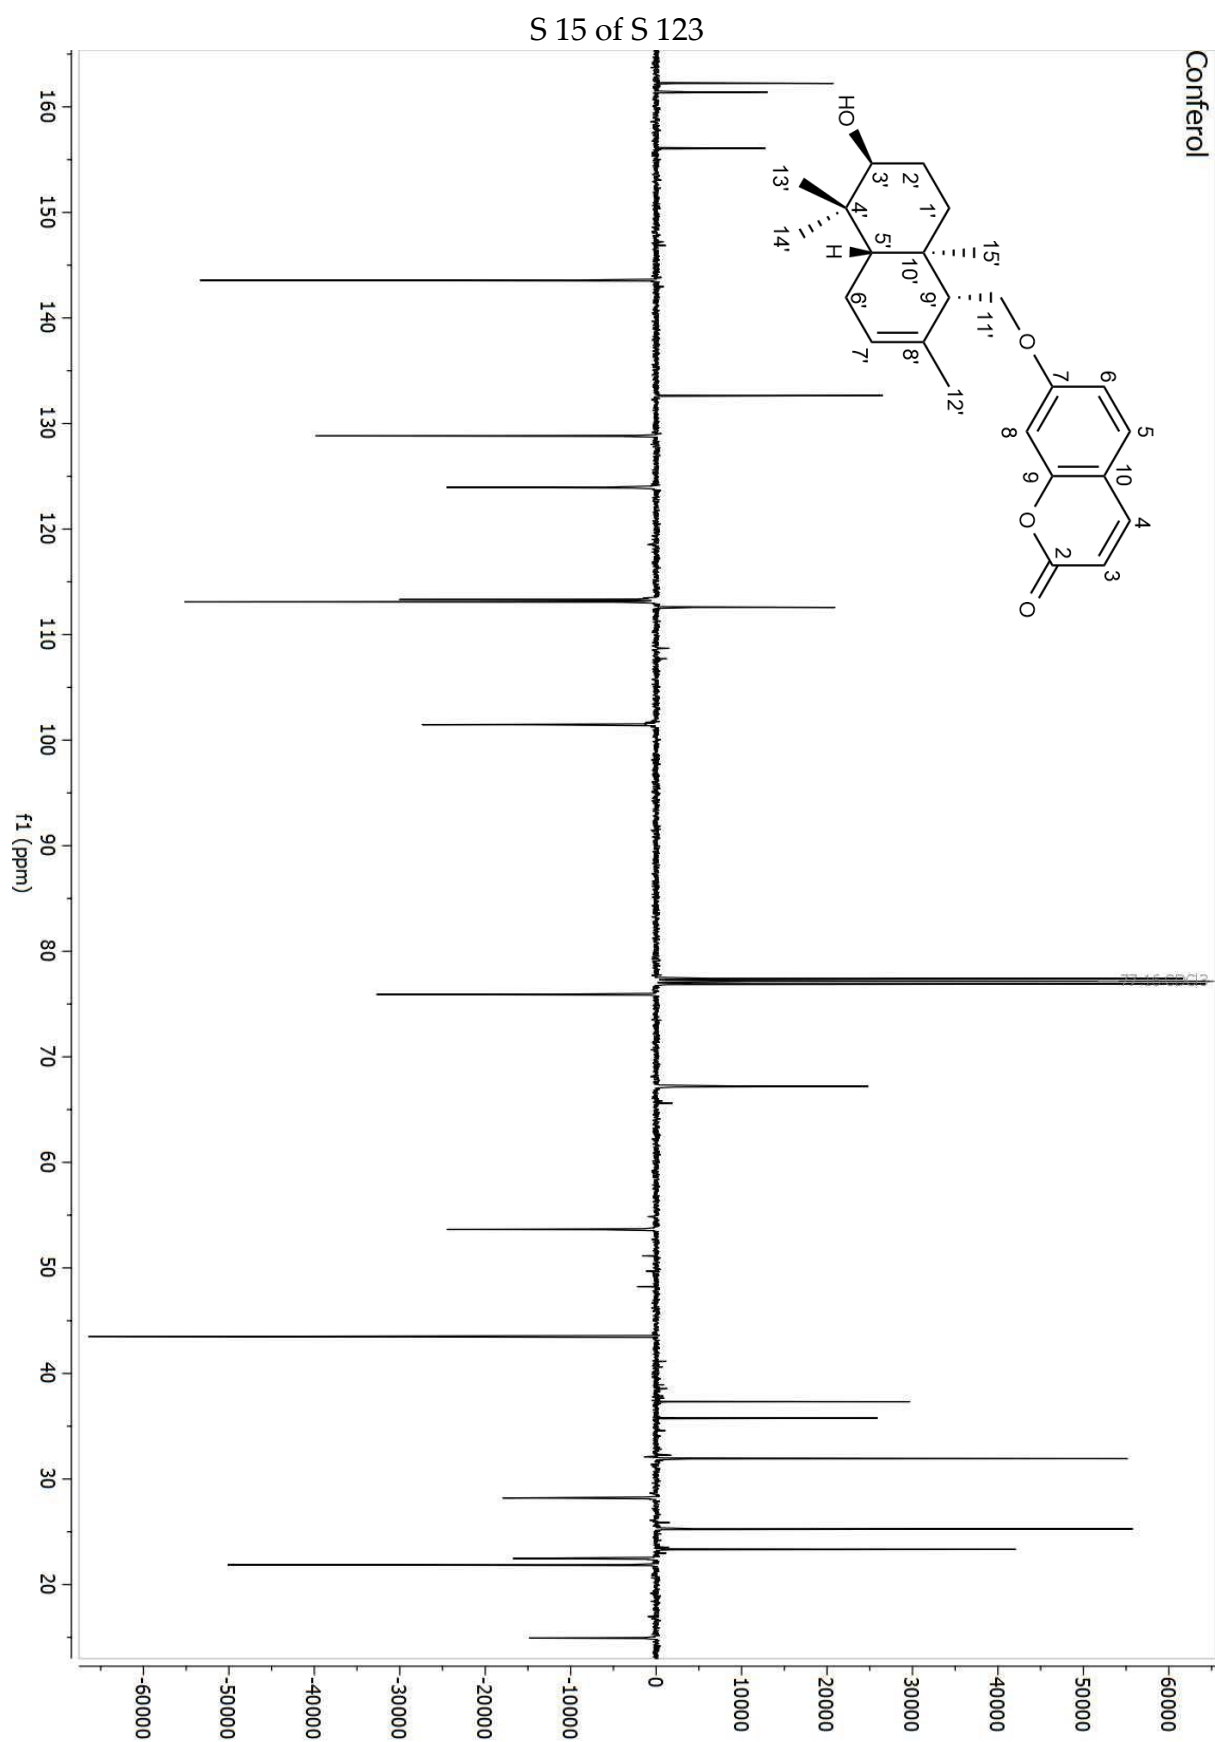

**Figure S9.**  $^{13}\text{C}$ -NMR (APT) spectrum (125 MHz,  $\text{CDCl}_3$ ) of conferol (2)

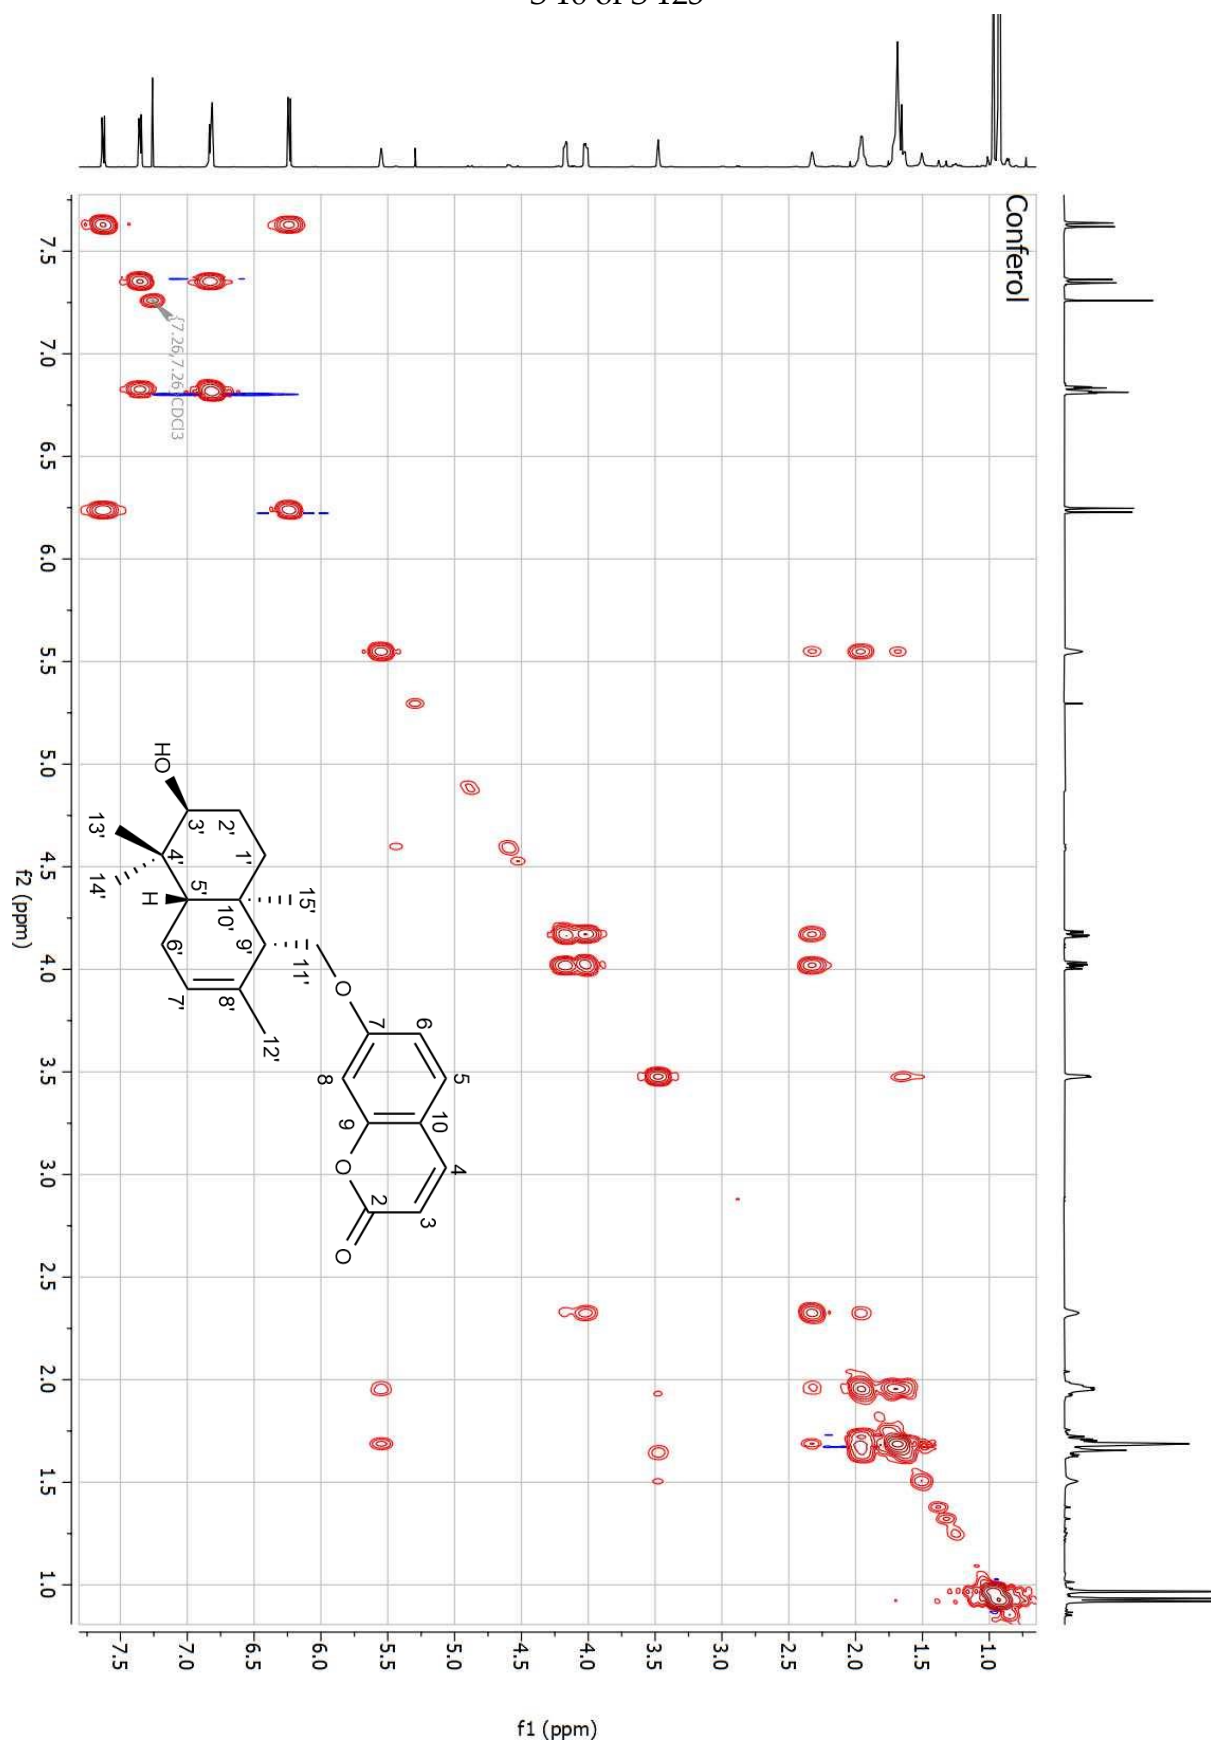**Figure S10.**  $^1\text{H}$ - $^1\text{H}$  COSY spectrum ( $\text{CDCl}_3$ ) of conferol (2)

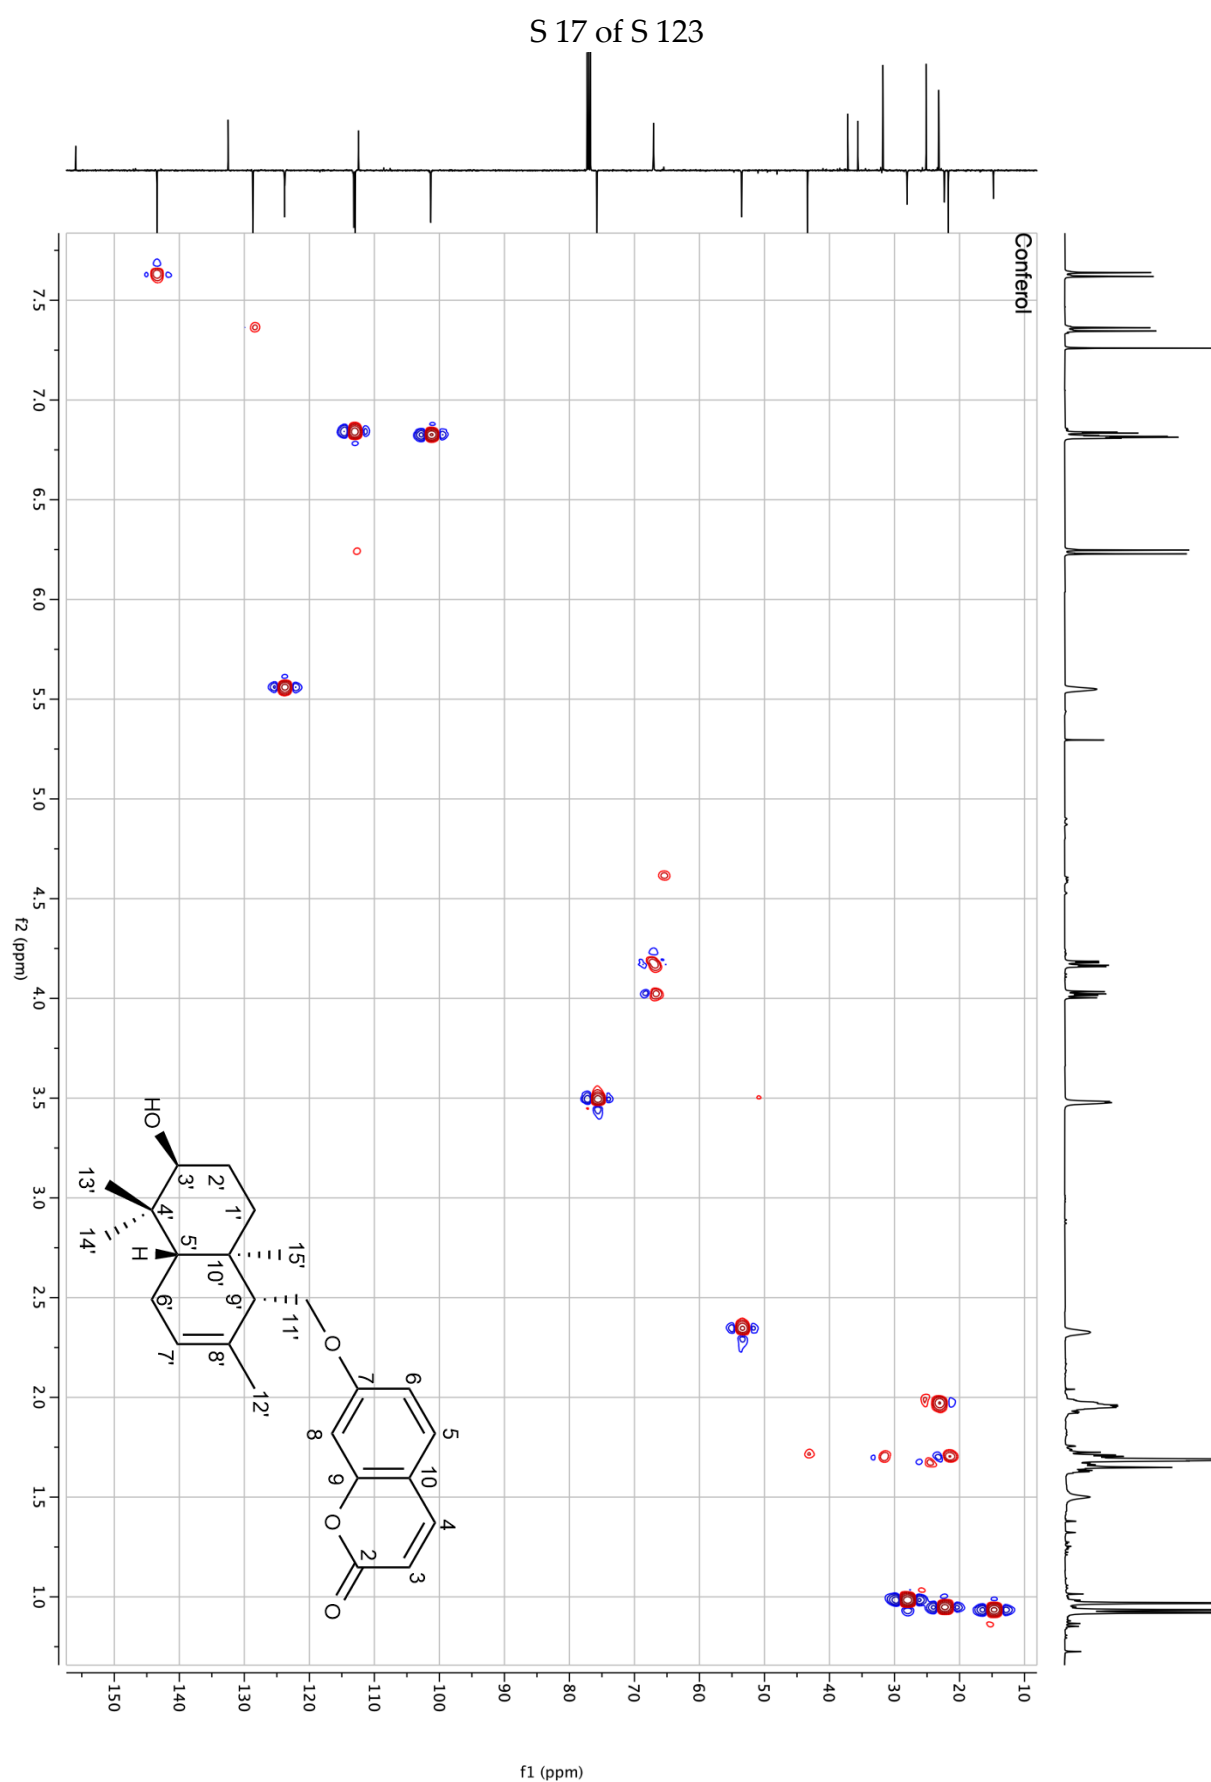

**Figure S11.** HSQC spectrum ( $\text{CDCl}_3$ ) of conferyl (2)

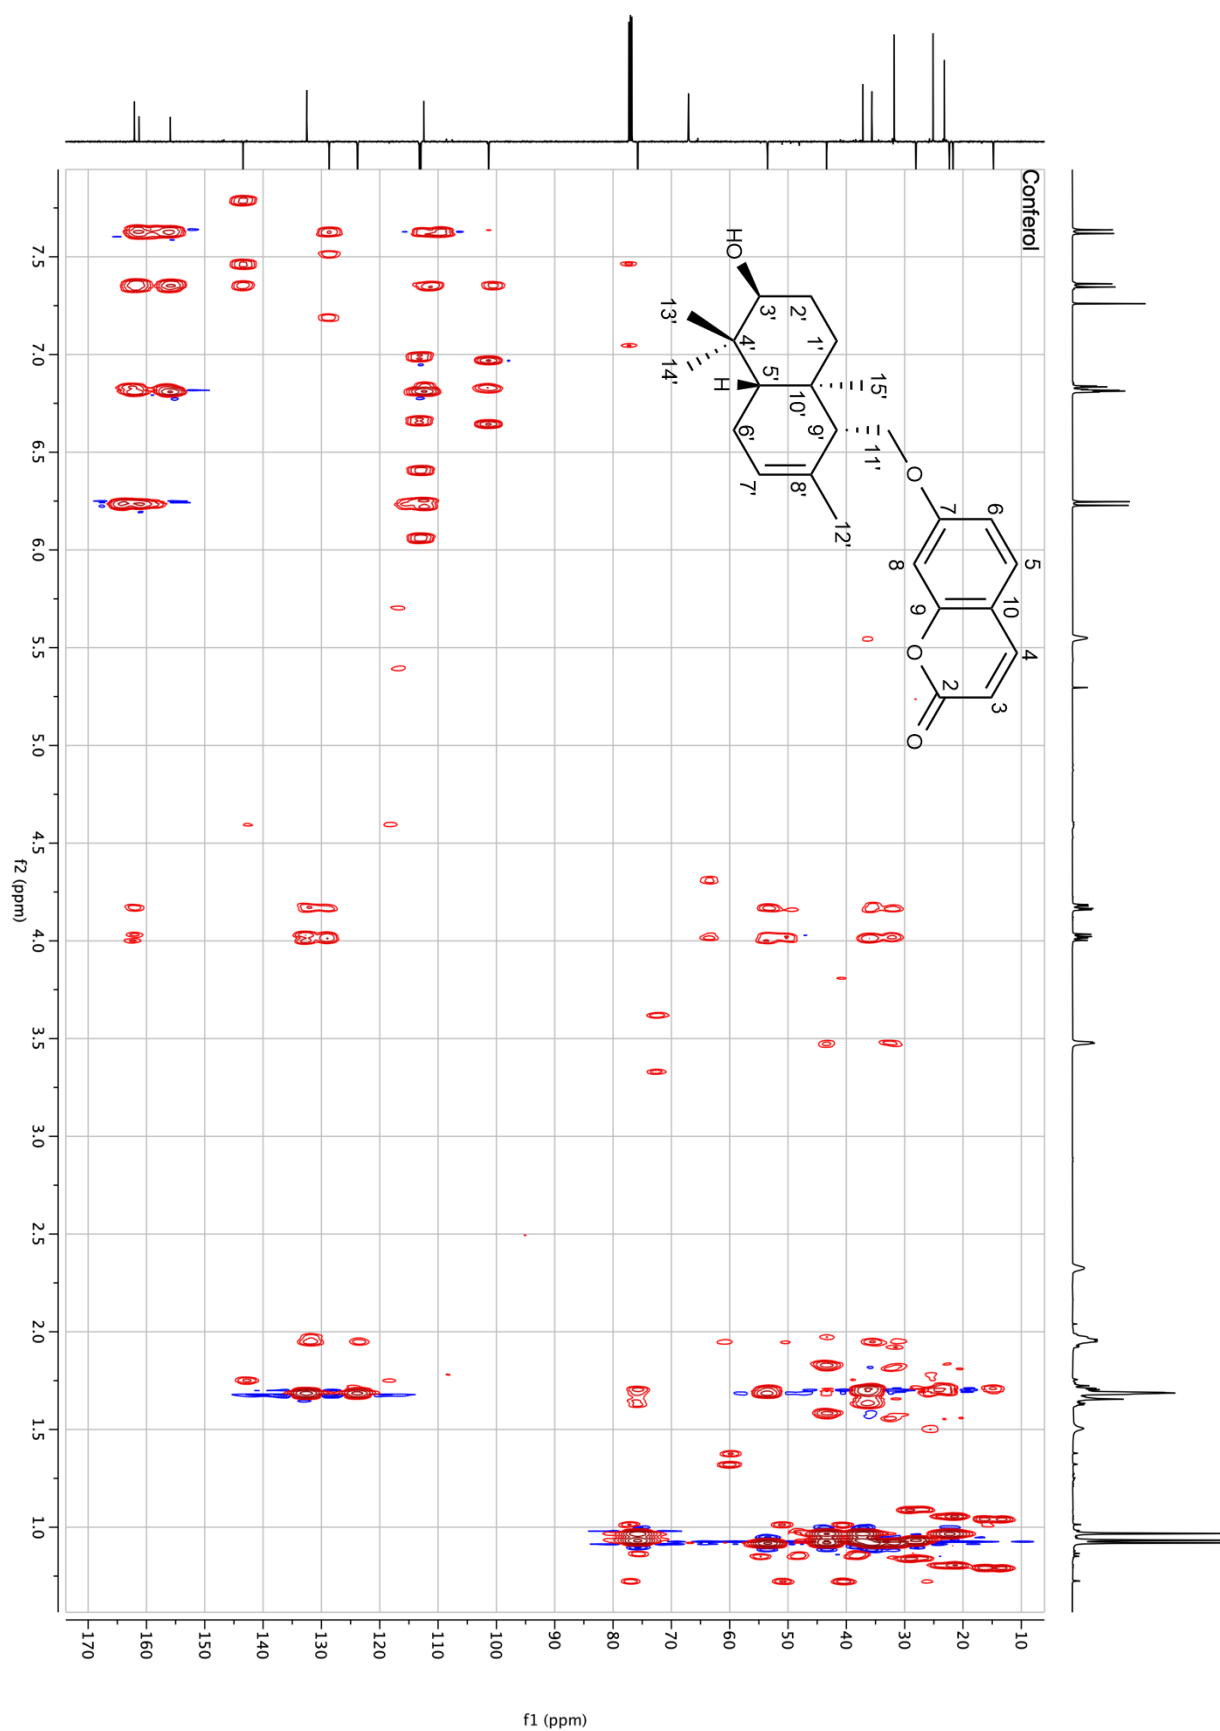**Figure S12.** HMBC spectrum ( $\text{CDCl}_3$ ) of conferol (2)

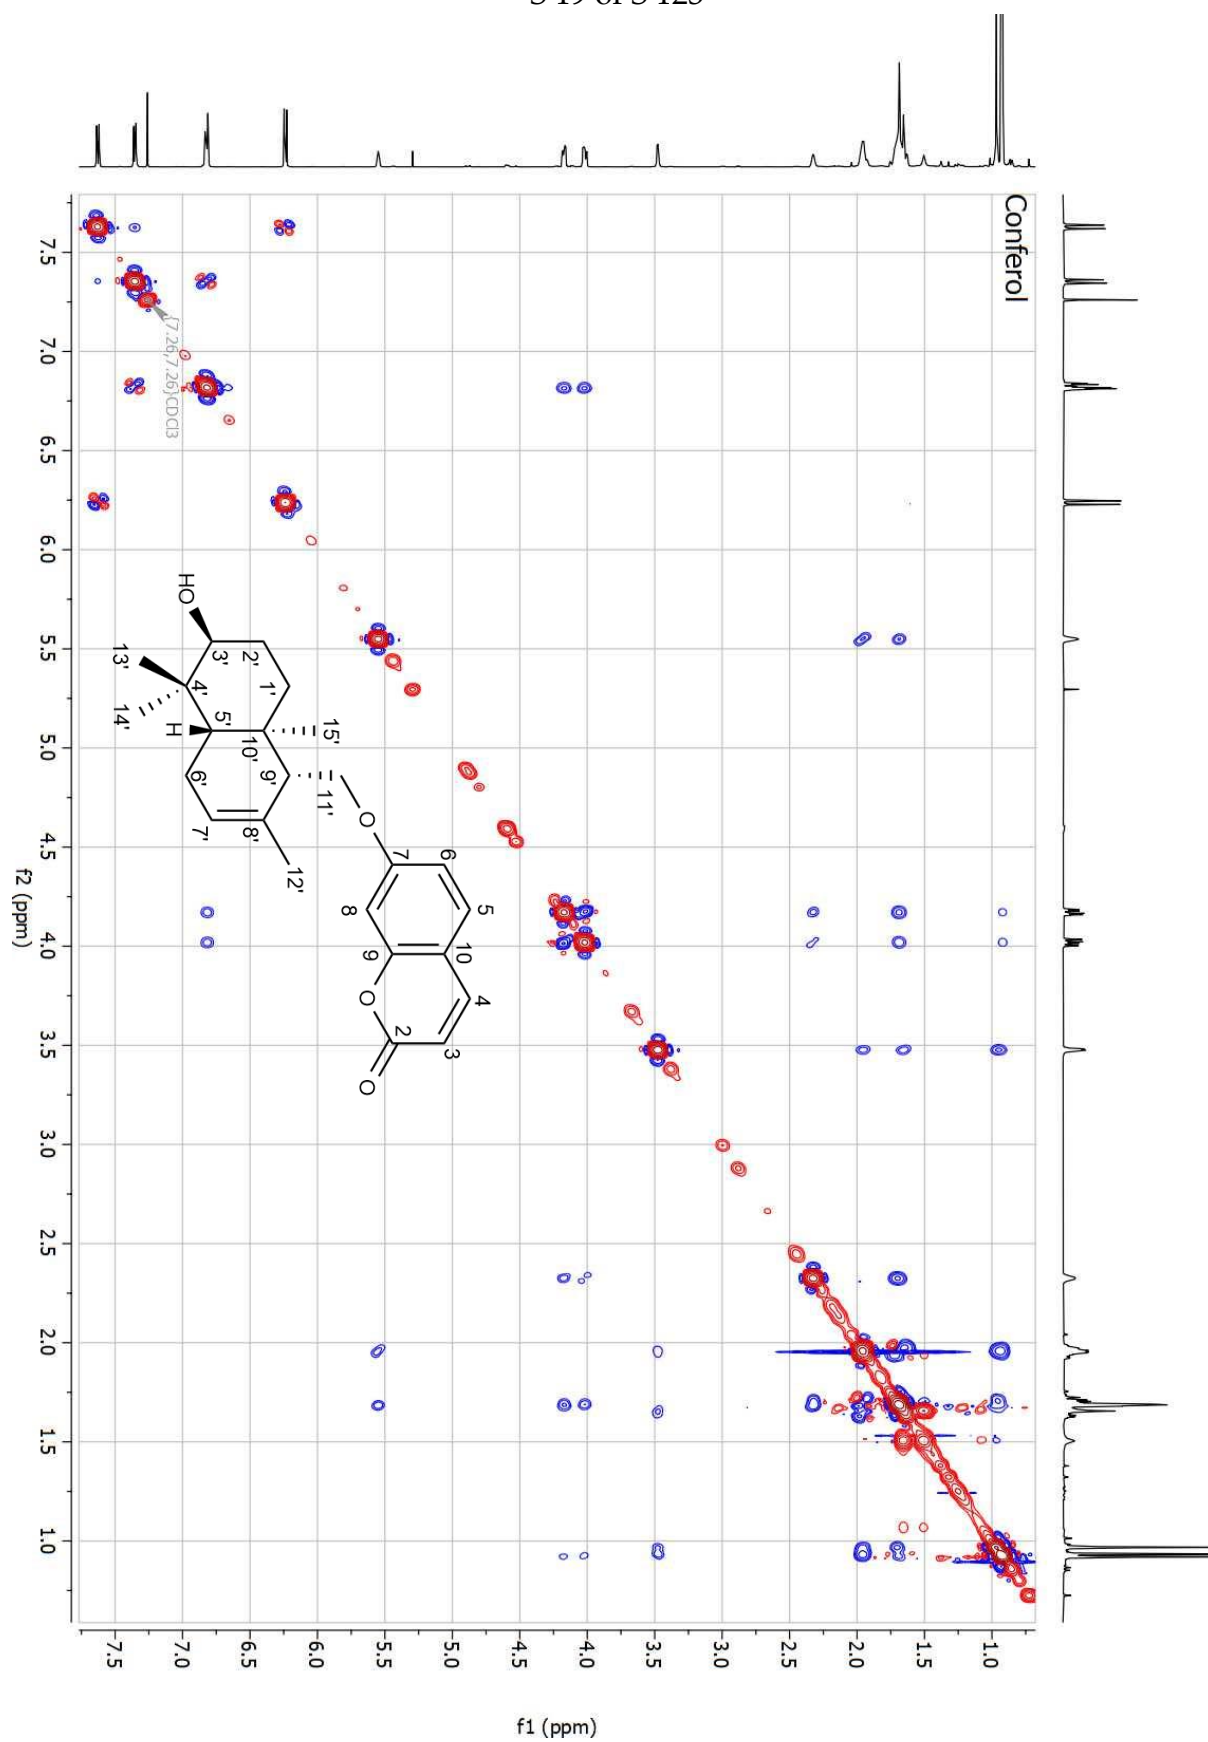**Figure S13.** NOESY spectrum (CDCl<sub>3</sub>) of conferol (2)

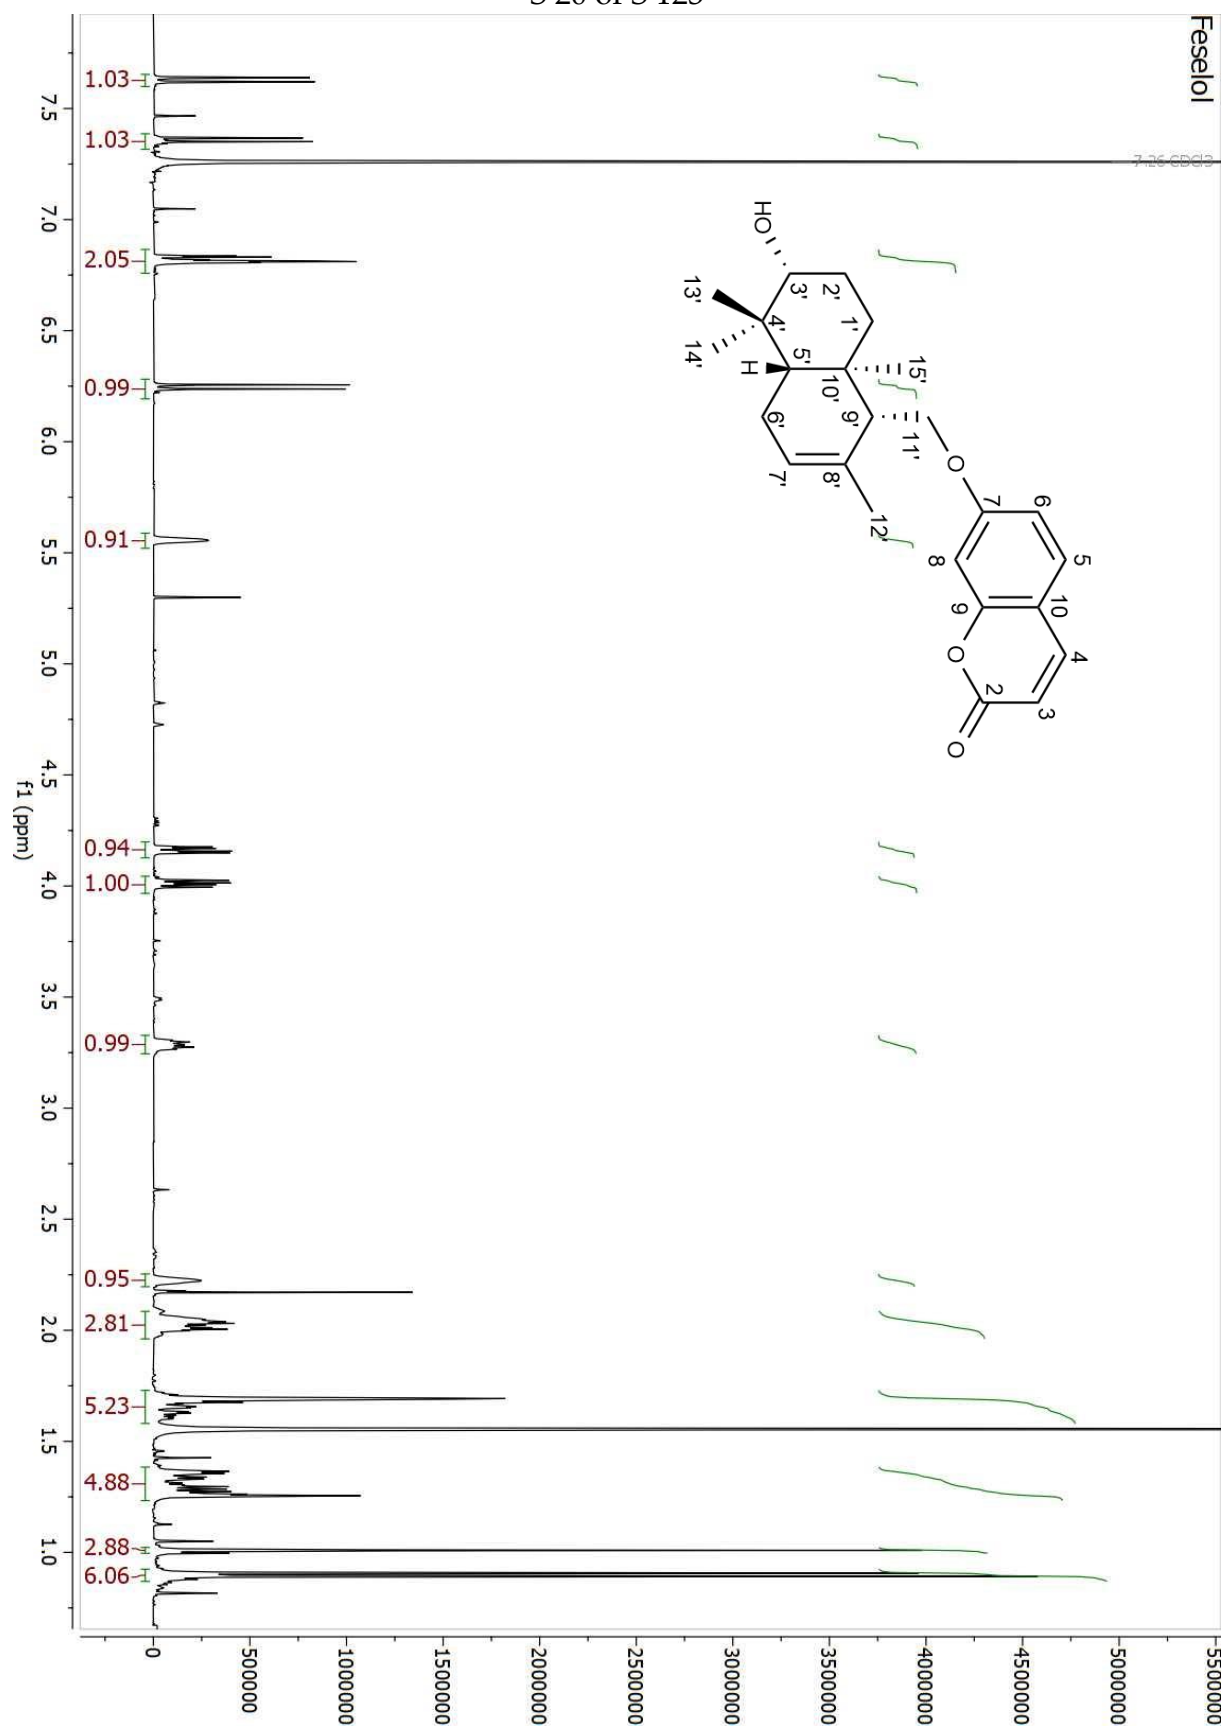

**Figure S14.** <sup>1</sup>H-NMR spectrum (500 MHz, CDCl<sub>3</sub>) of feselol (3)



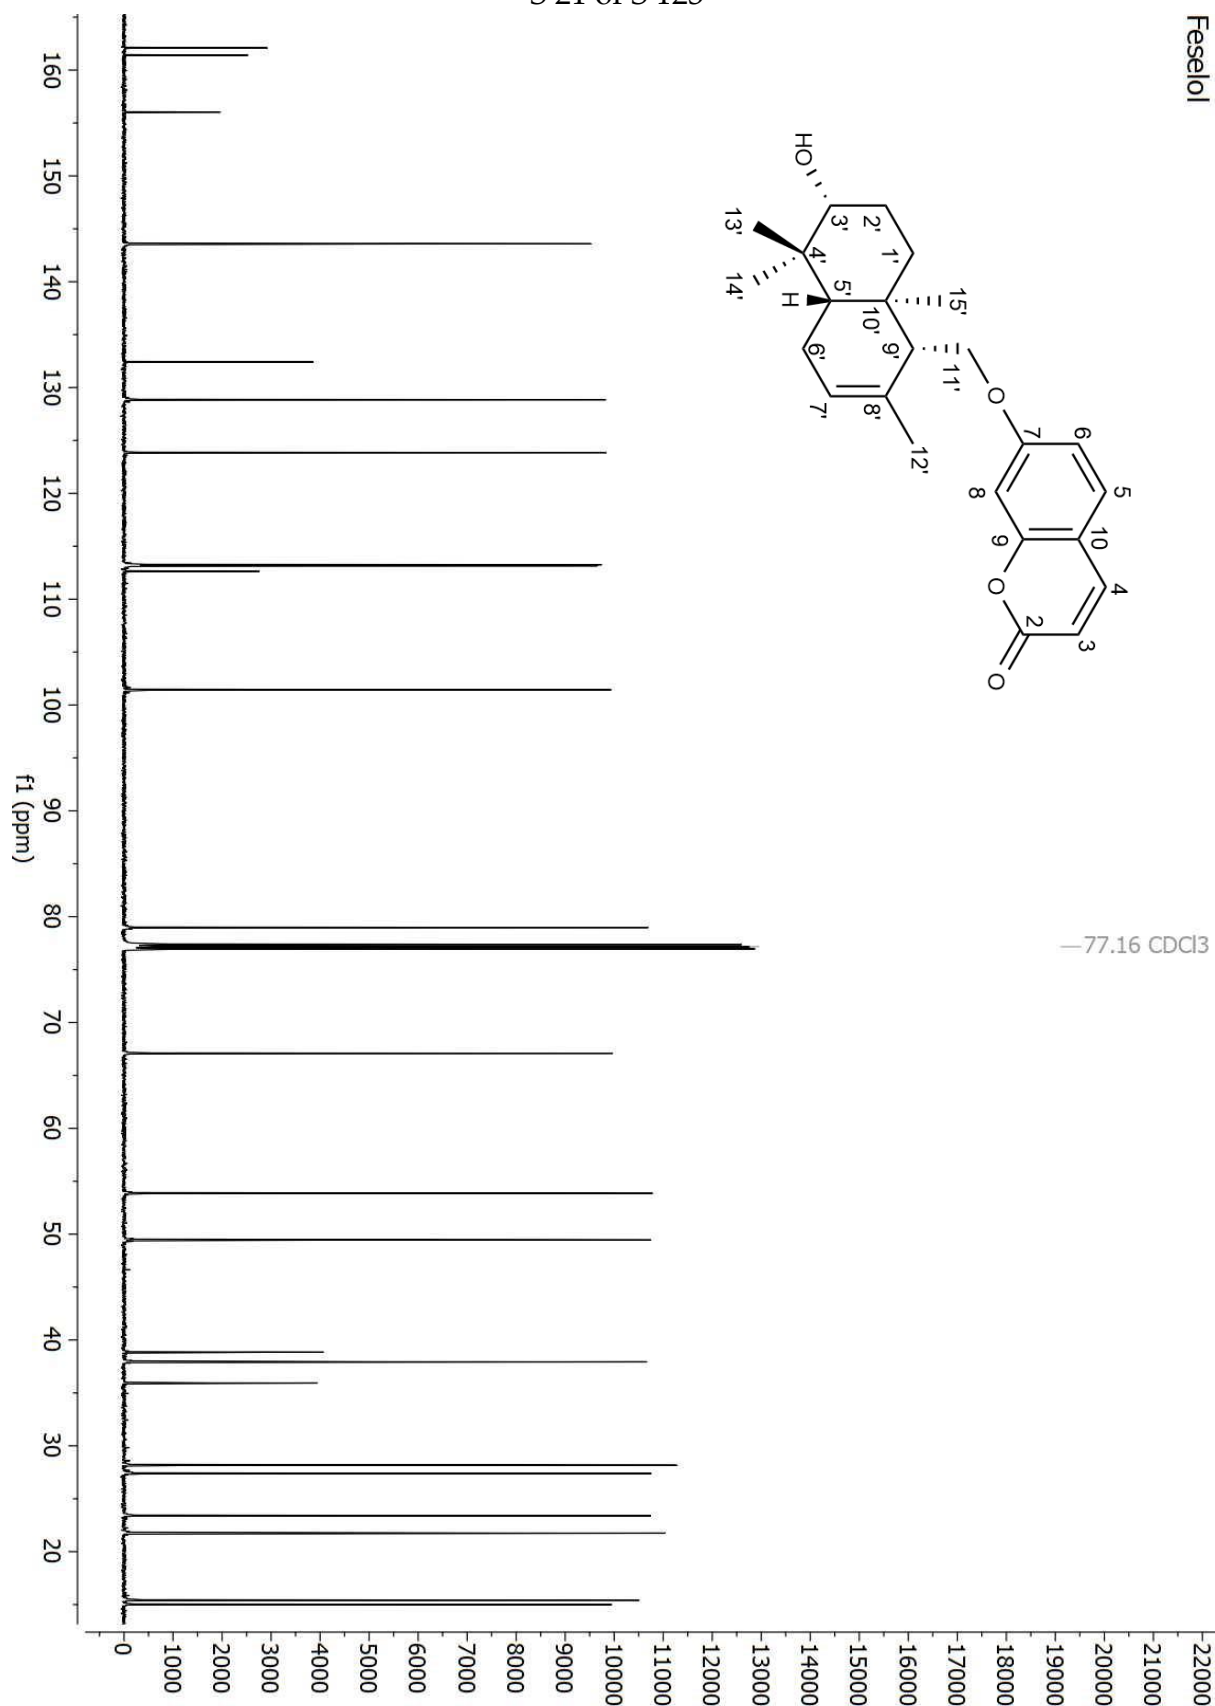

**Figure S15.** <sup>13</sup>C-NMR spectrum (125 MHz, CDCl<sub>3</sub>) of feselol (3)

S 22 of S 123

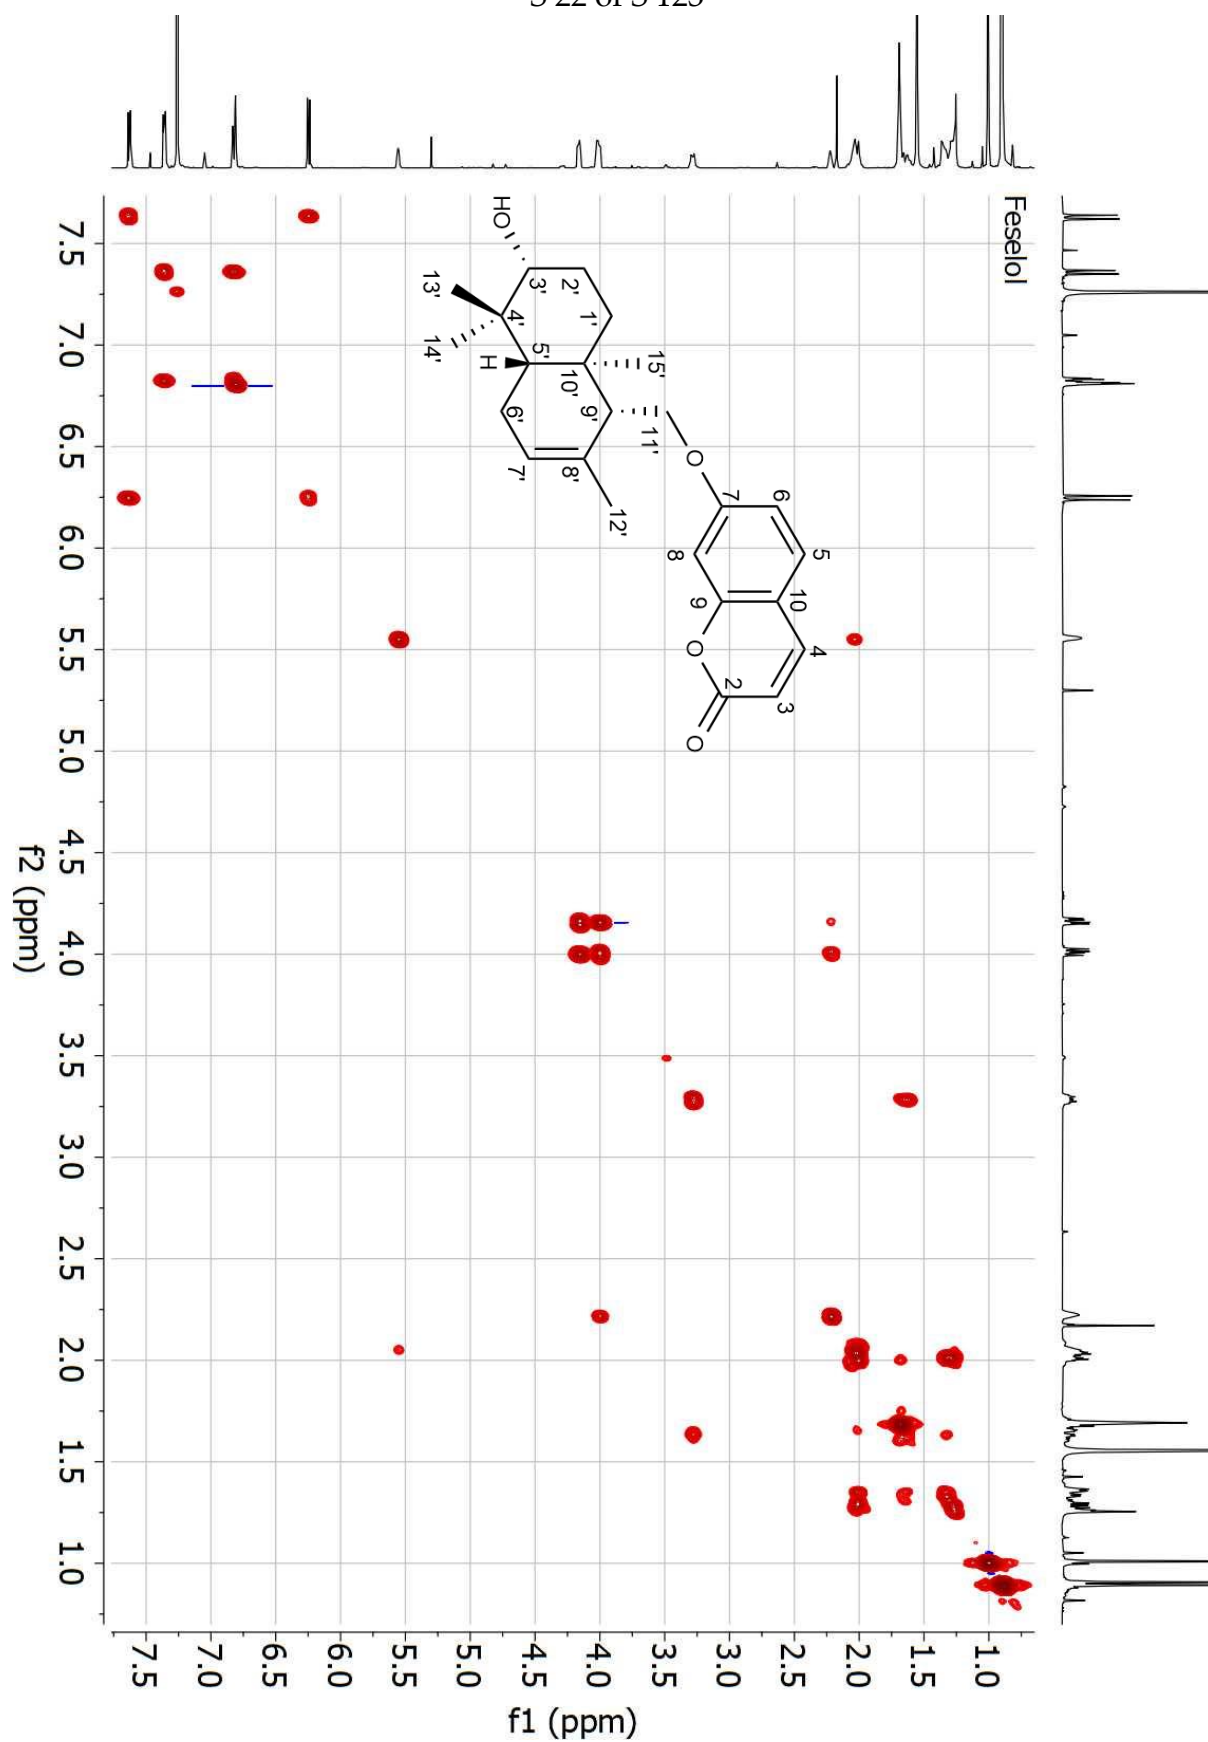**Figure S16.**  $^1\text{H}$ - $^1\text{H}$  COSY spectrum ( $\text{CDCl}_3$ ) of fesolol (3)

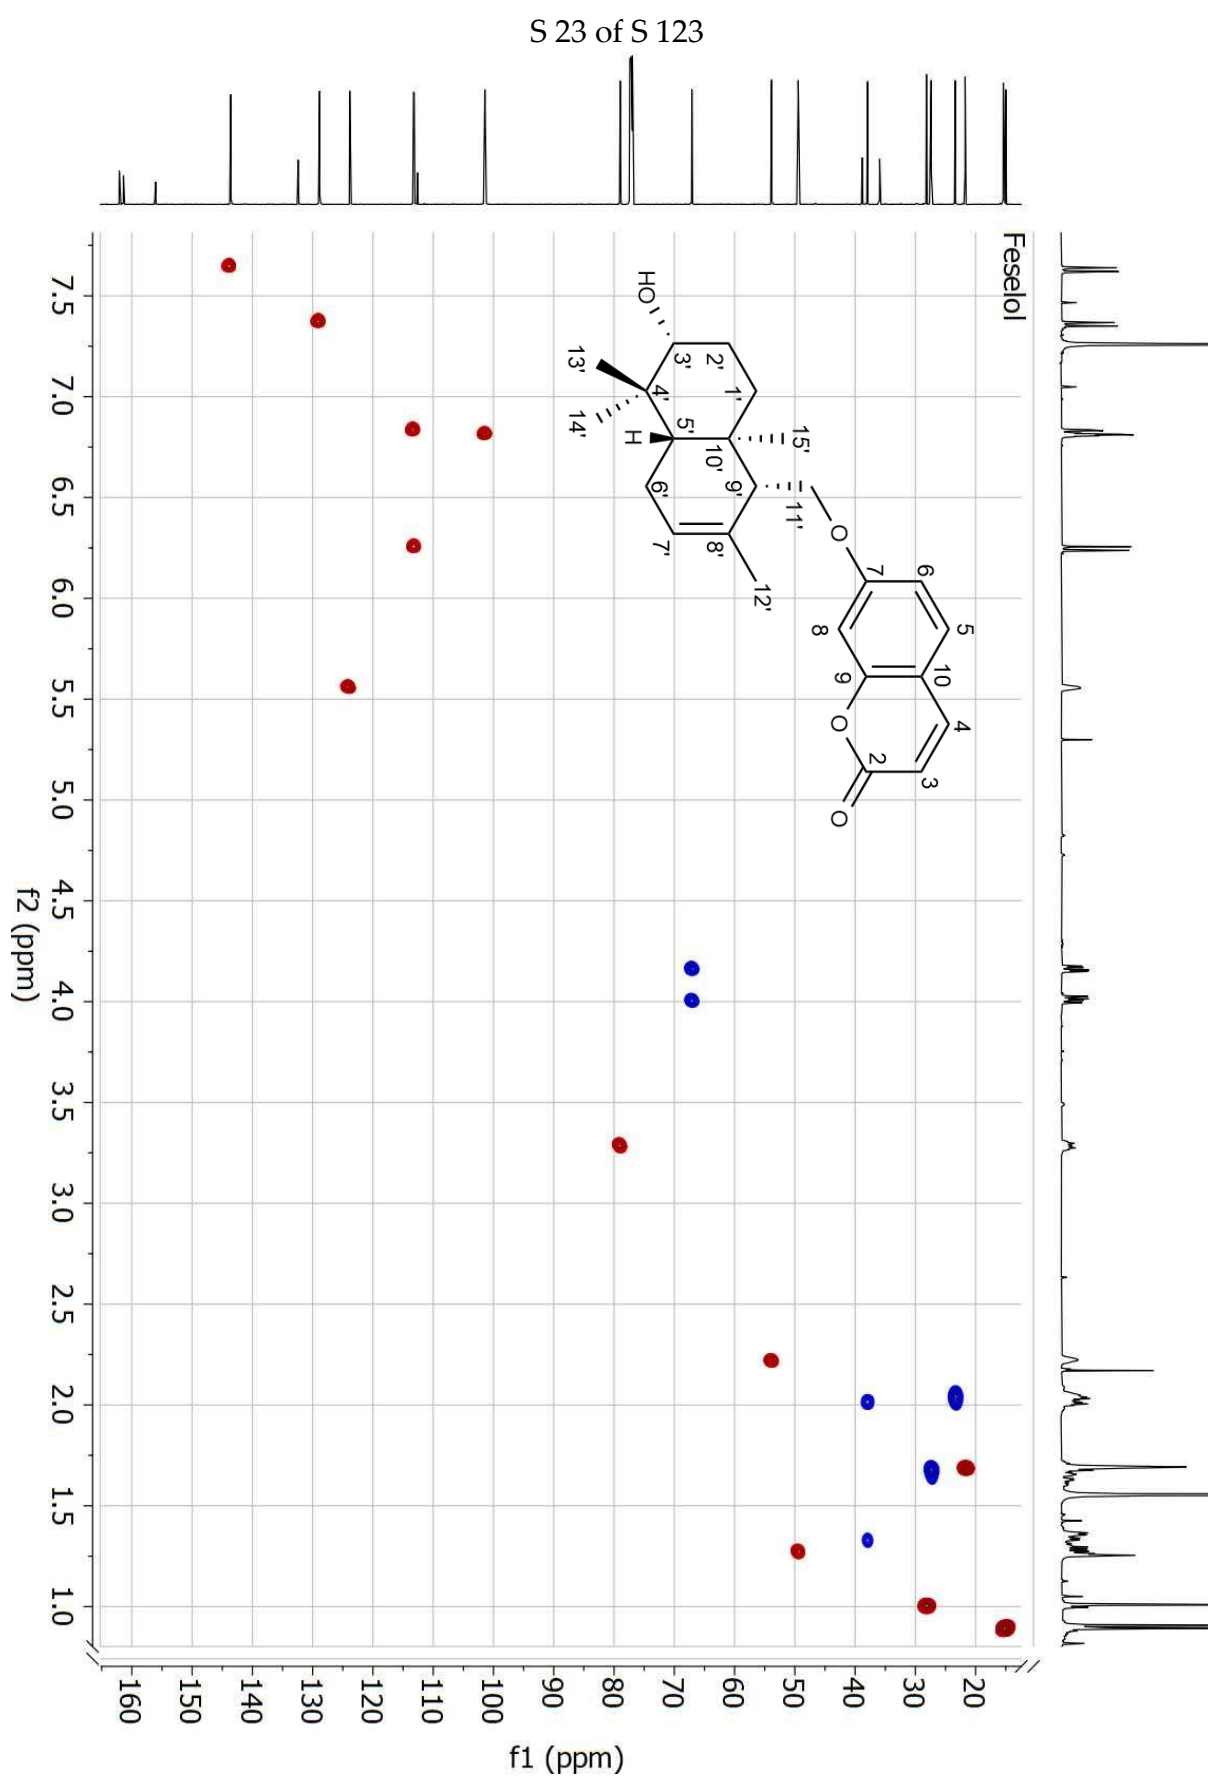

**Figure S17.** HSQC spectrum (CDCl<sub>3</sub>) of fesolol (3)

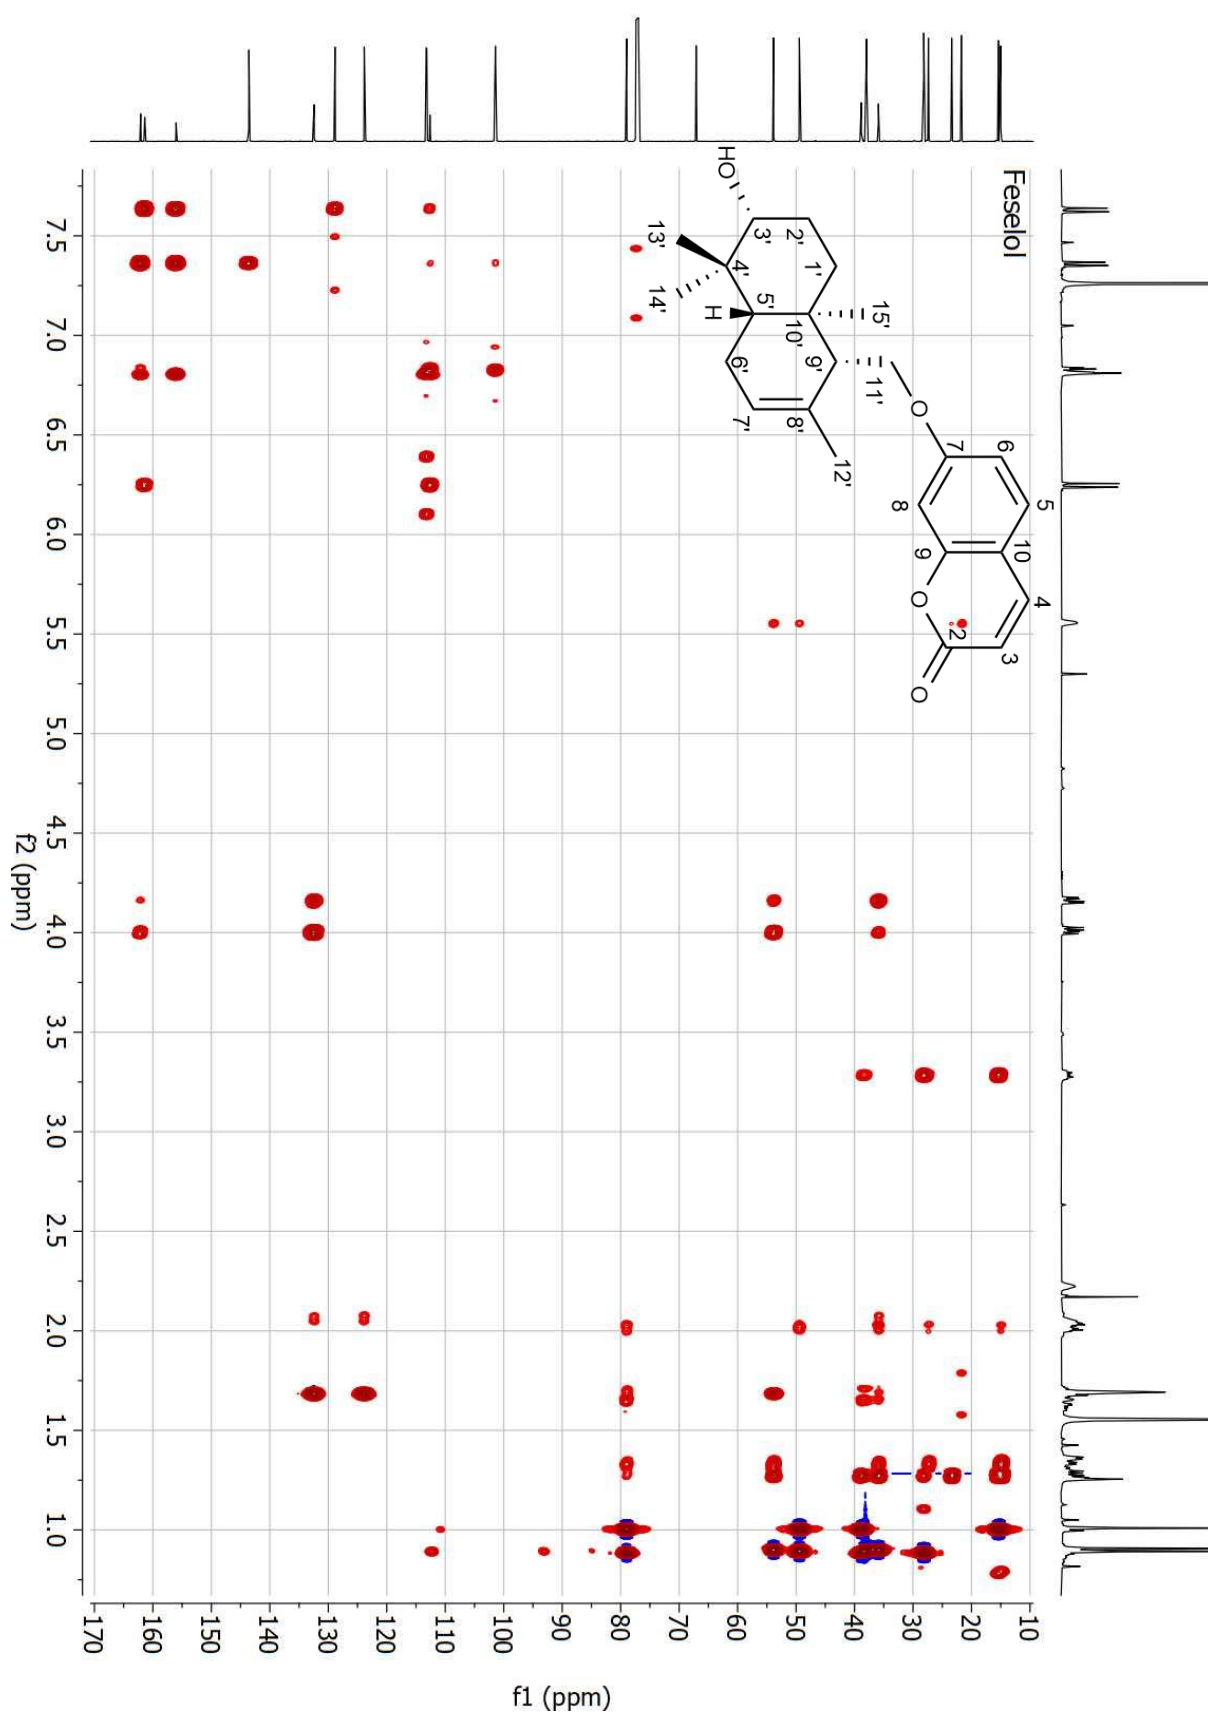**Figure S18.** HMBC spectrum (CDCl<sub>3</sub>) of feselol (3)

S 25 of S 123

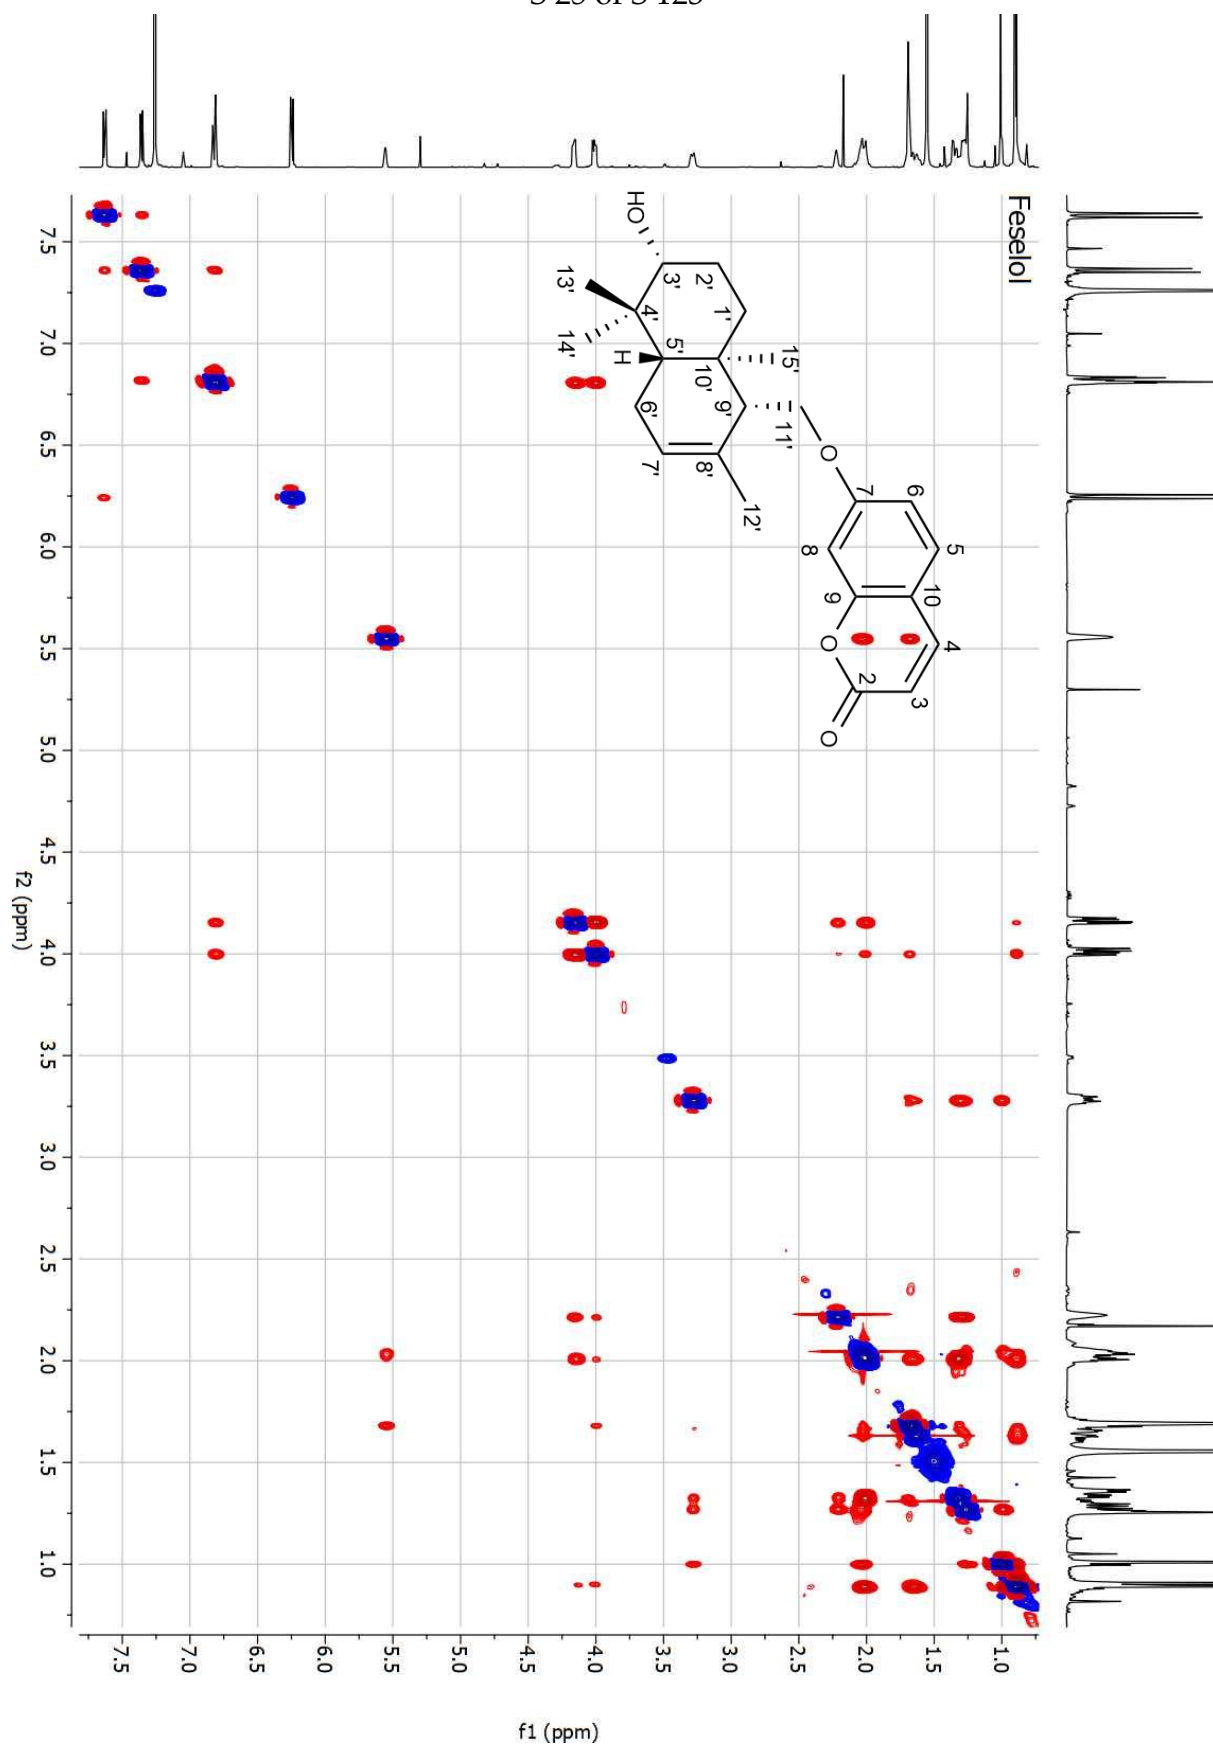**Figure S19.** NOESY spectrum (CDCl<sub>3</sub>) of fesolol (3)

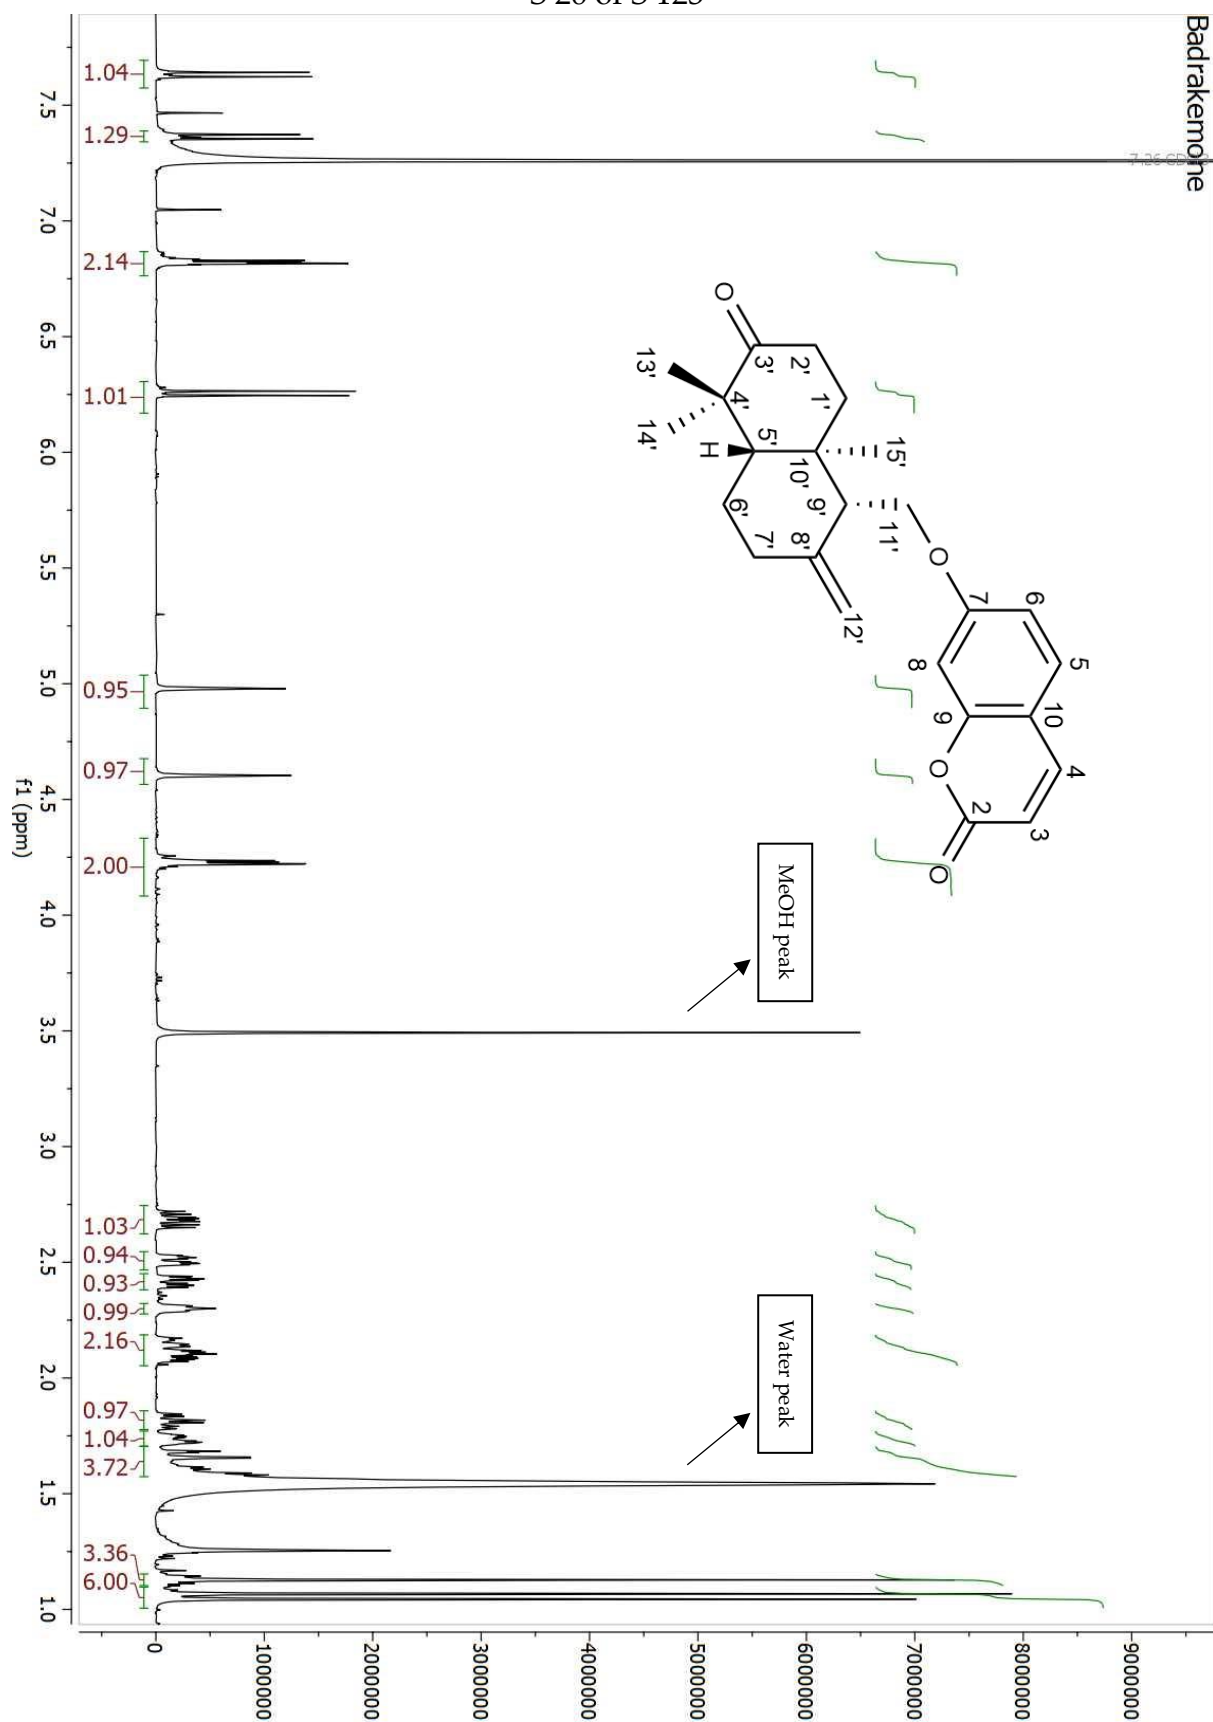

**Figure S20.**  $^1\text{H}$ -NMR spectrum (500 MHz,  $\text{CDCl}_3$ ) of badrakemone (4)

## Badrakemone

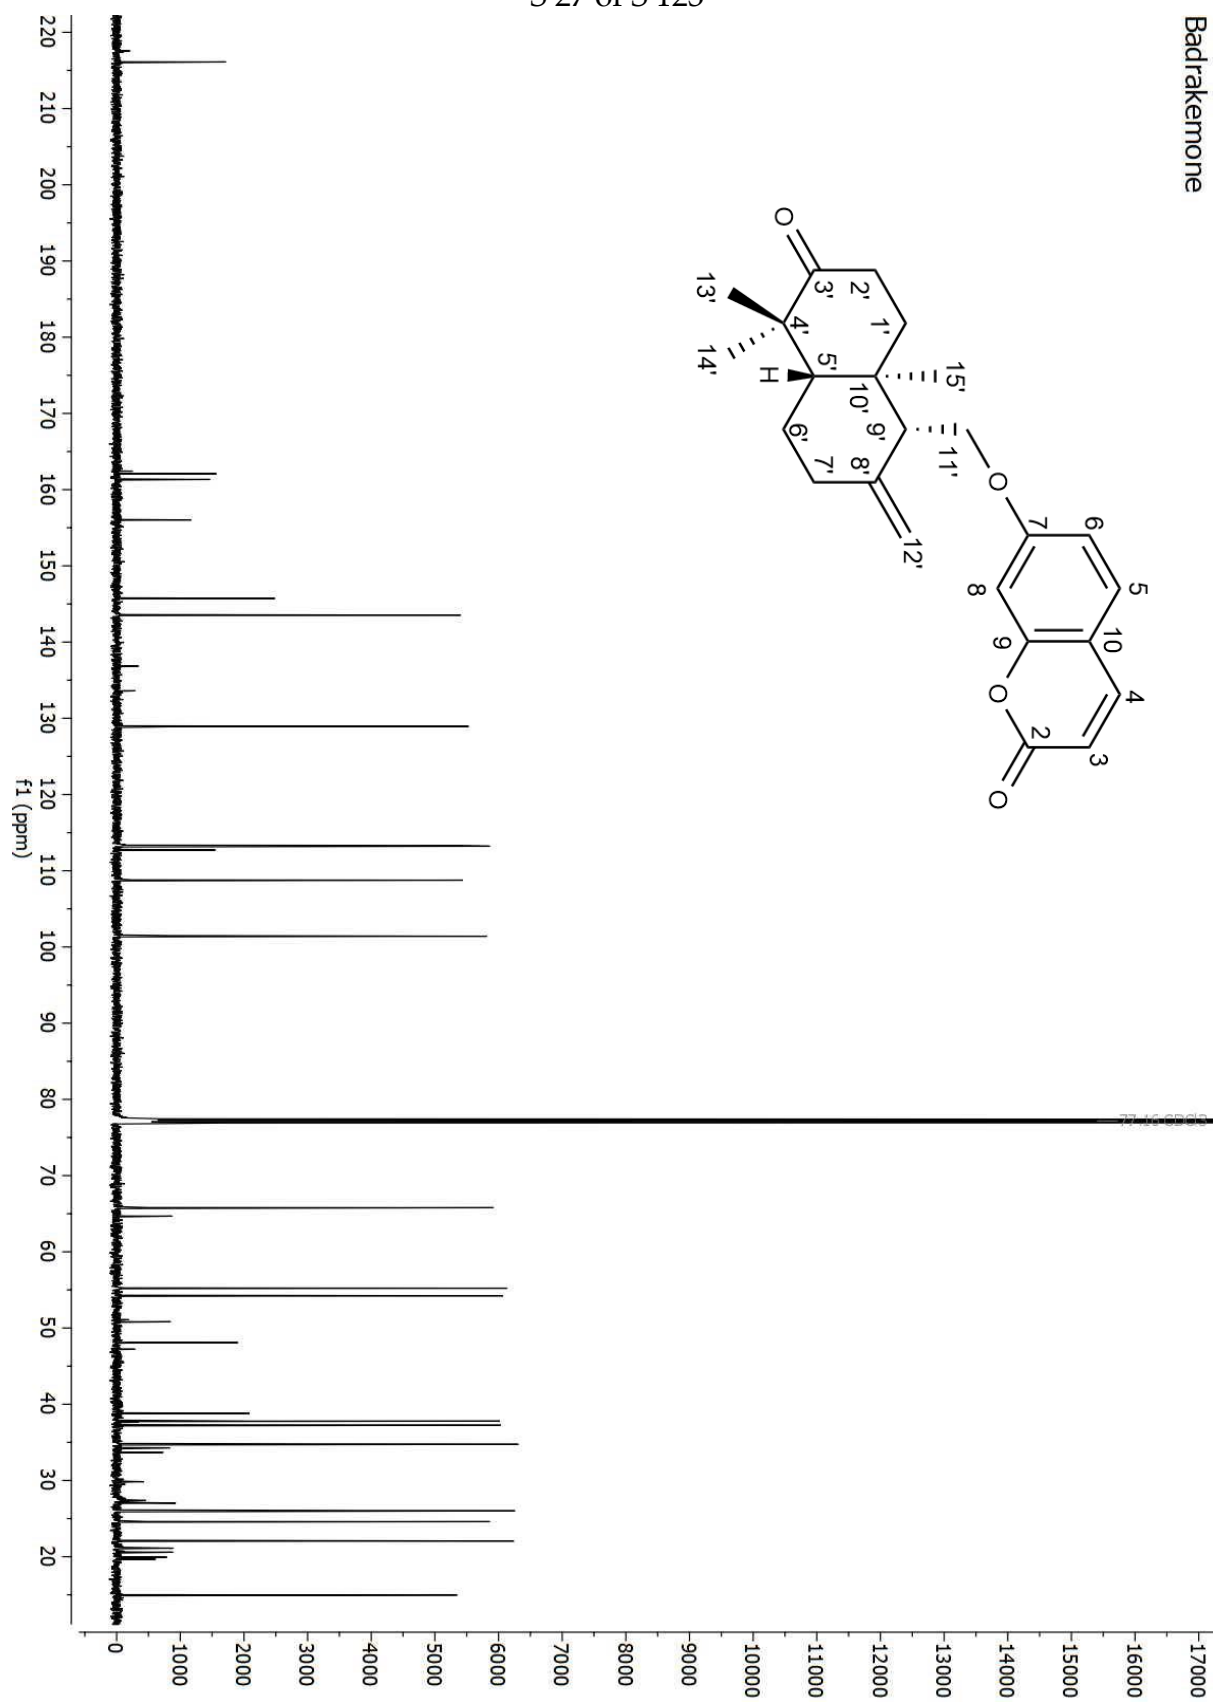**Figure S21.**  $^{13}\text{C}$ -NMR spectrum (125 MHz,  $\text{CDCl}_3$ ) of badrakemone (4)

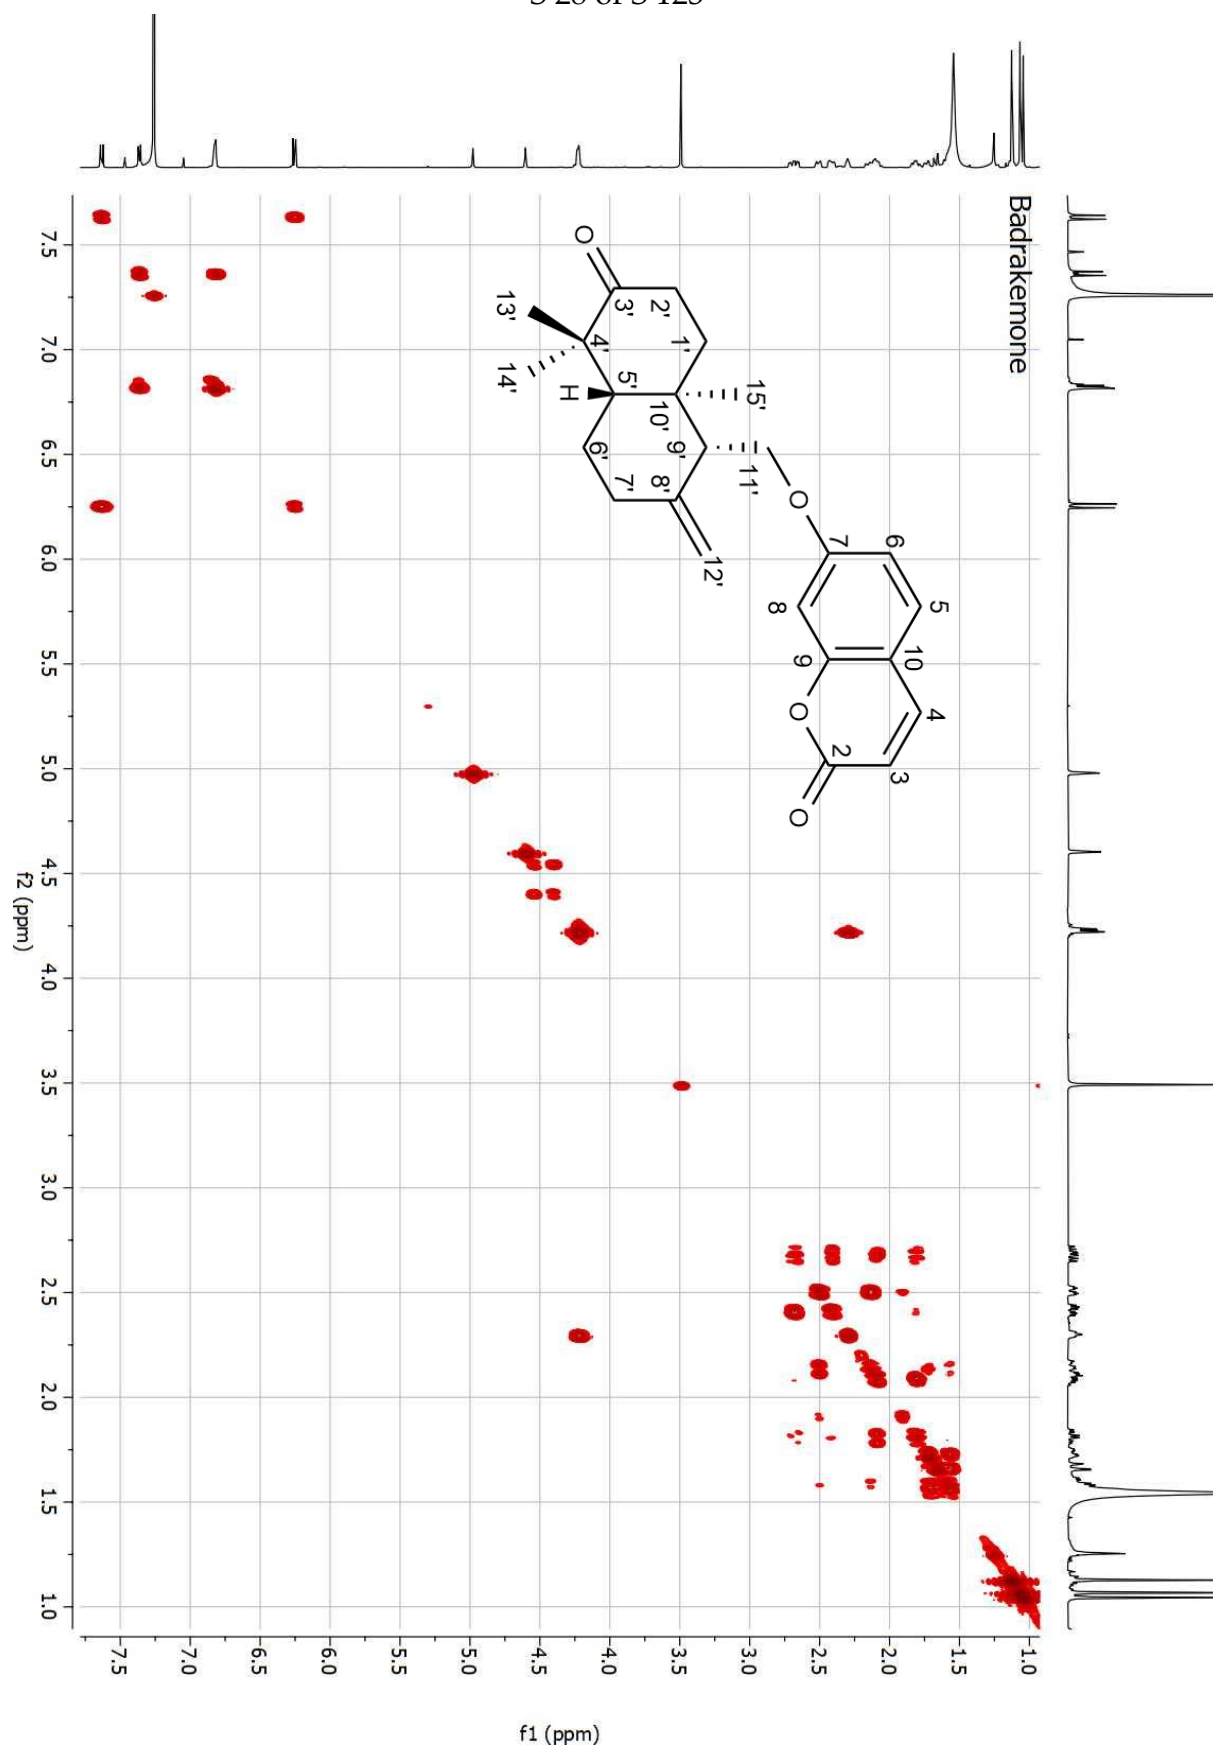

**Figure S22.** <sup>1</sup>H-<sup>1</sup>H COSY spectrum (CDCl<sub>3</sub>) of badrakemone (4)



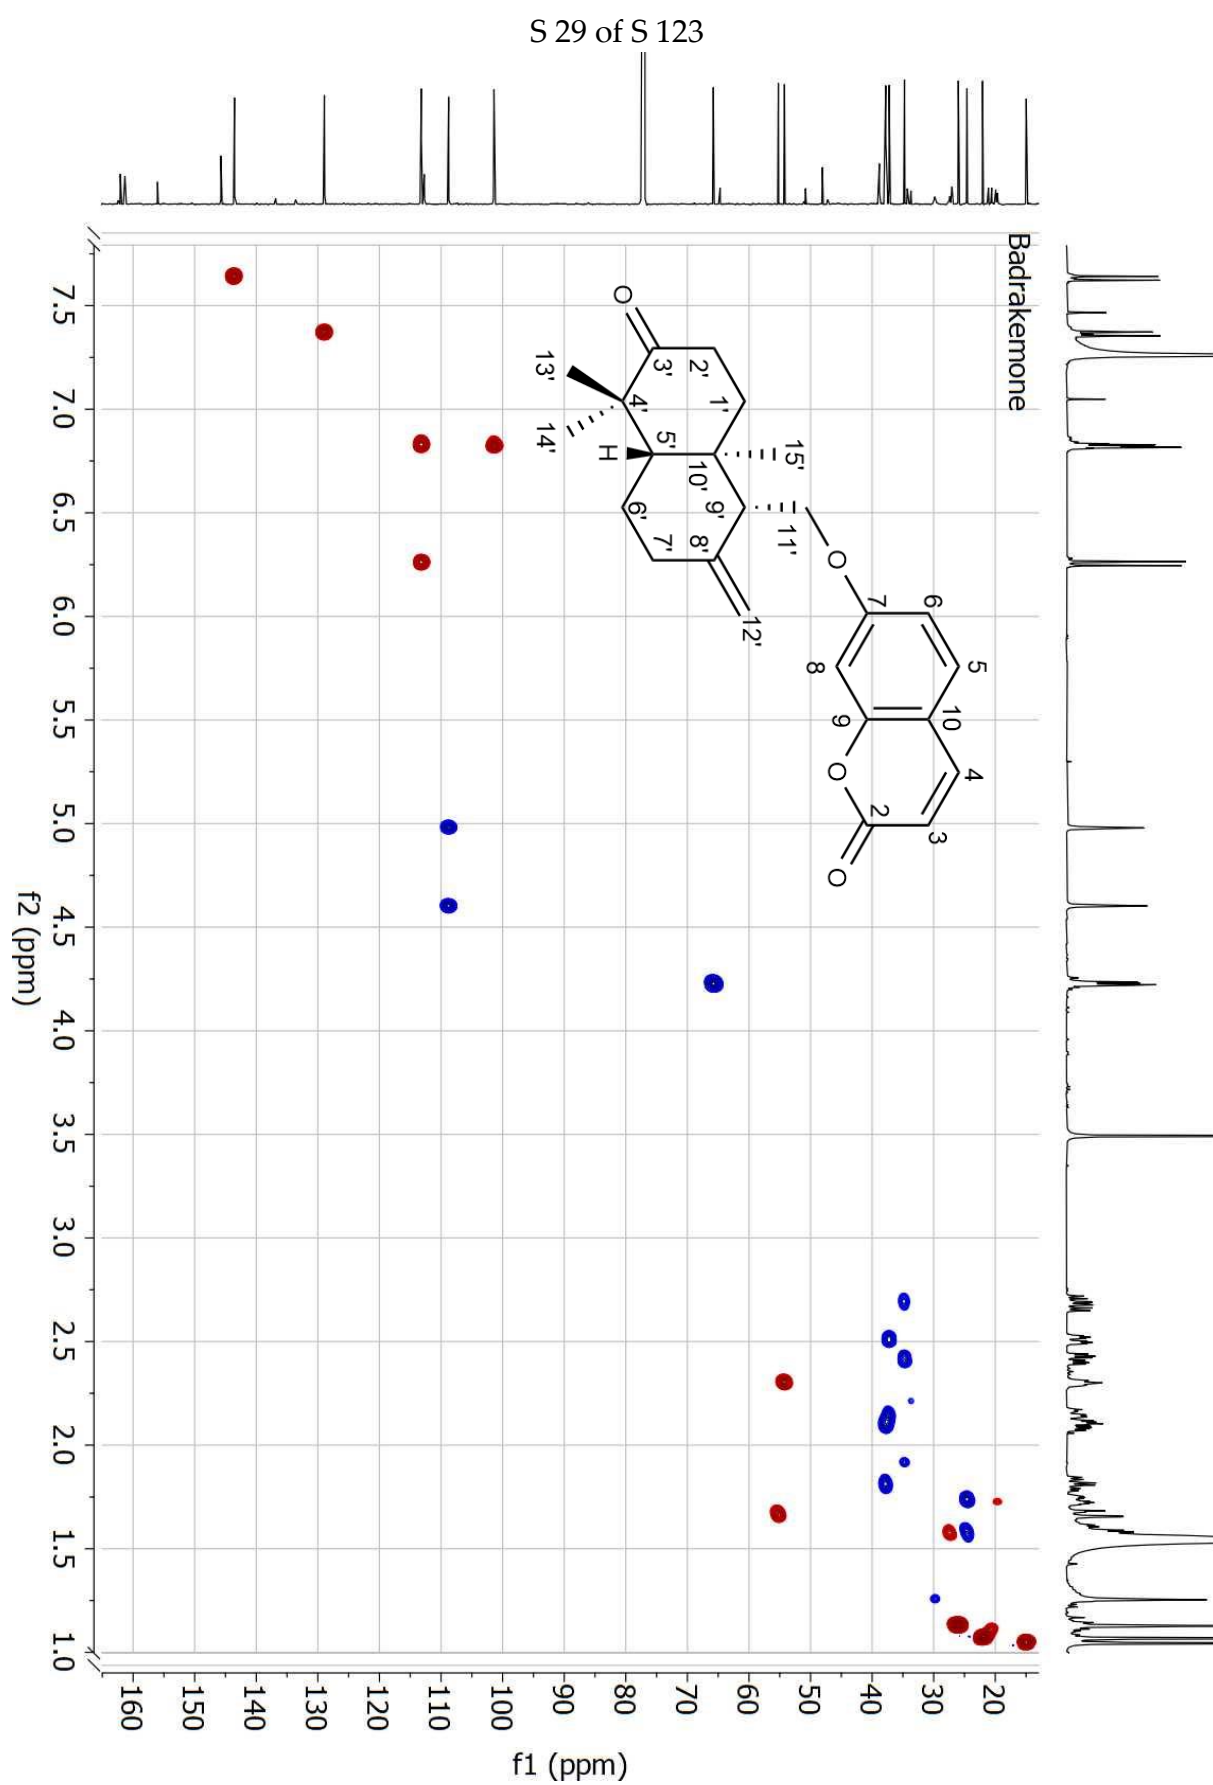

**Figure S23.** HSQC spectrum (CDCl<sub>3</sub>) of badrakemone (4)

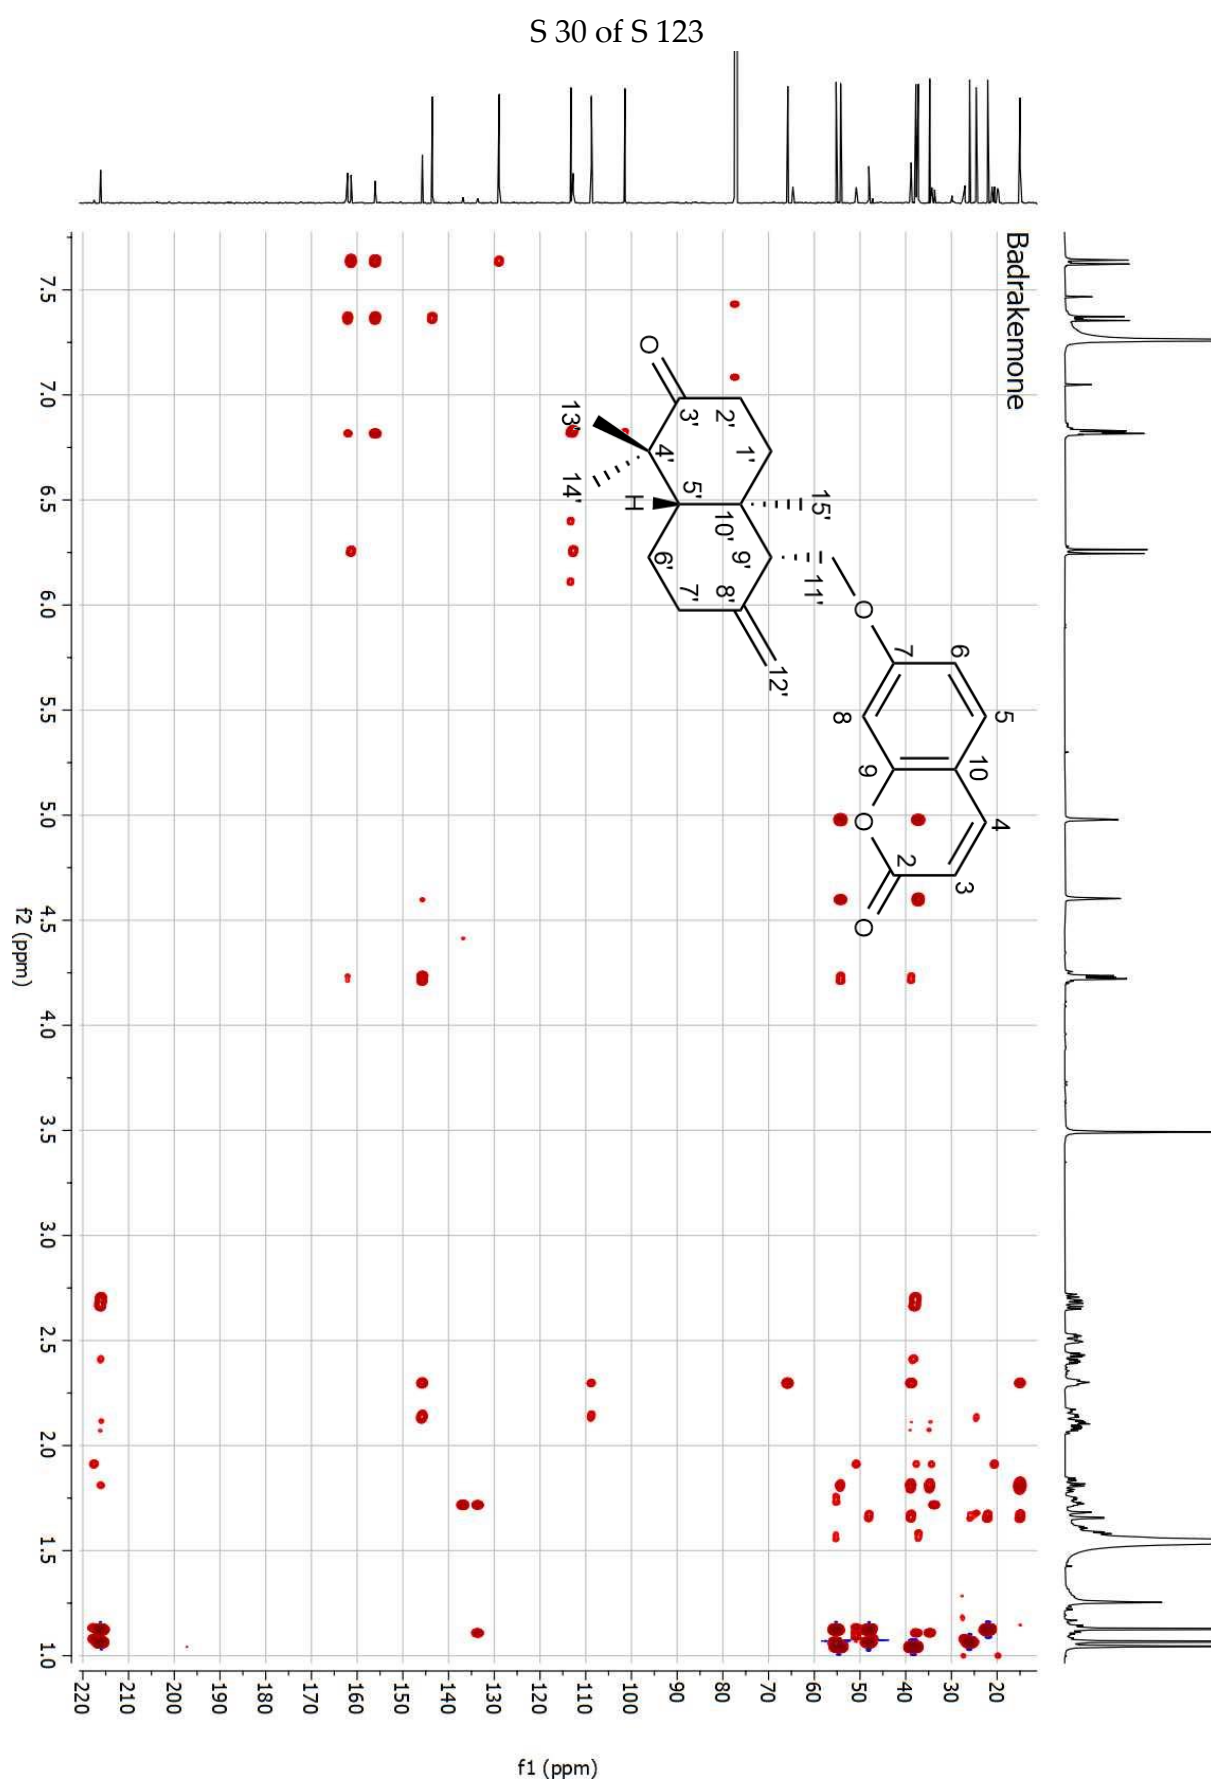

**Figure S24.** HMBC spectrum (CDCl<sub>3</sub>) of badrakemone (4)

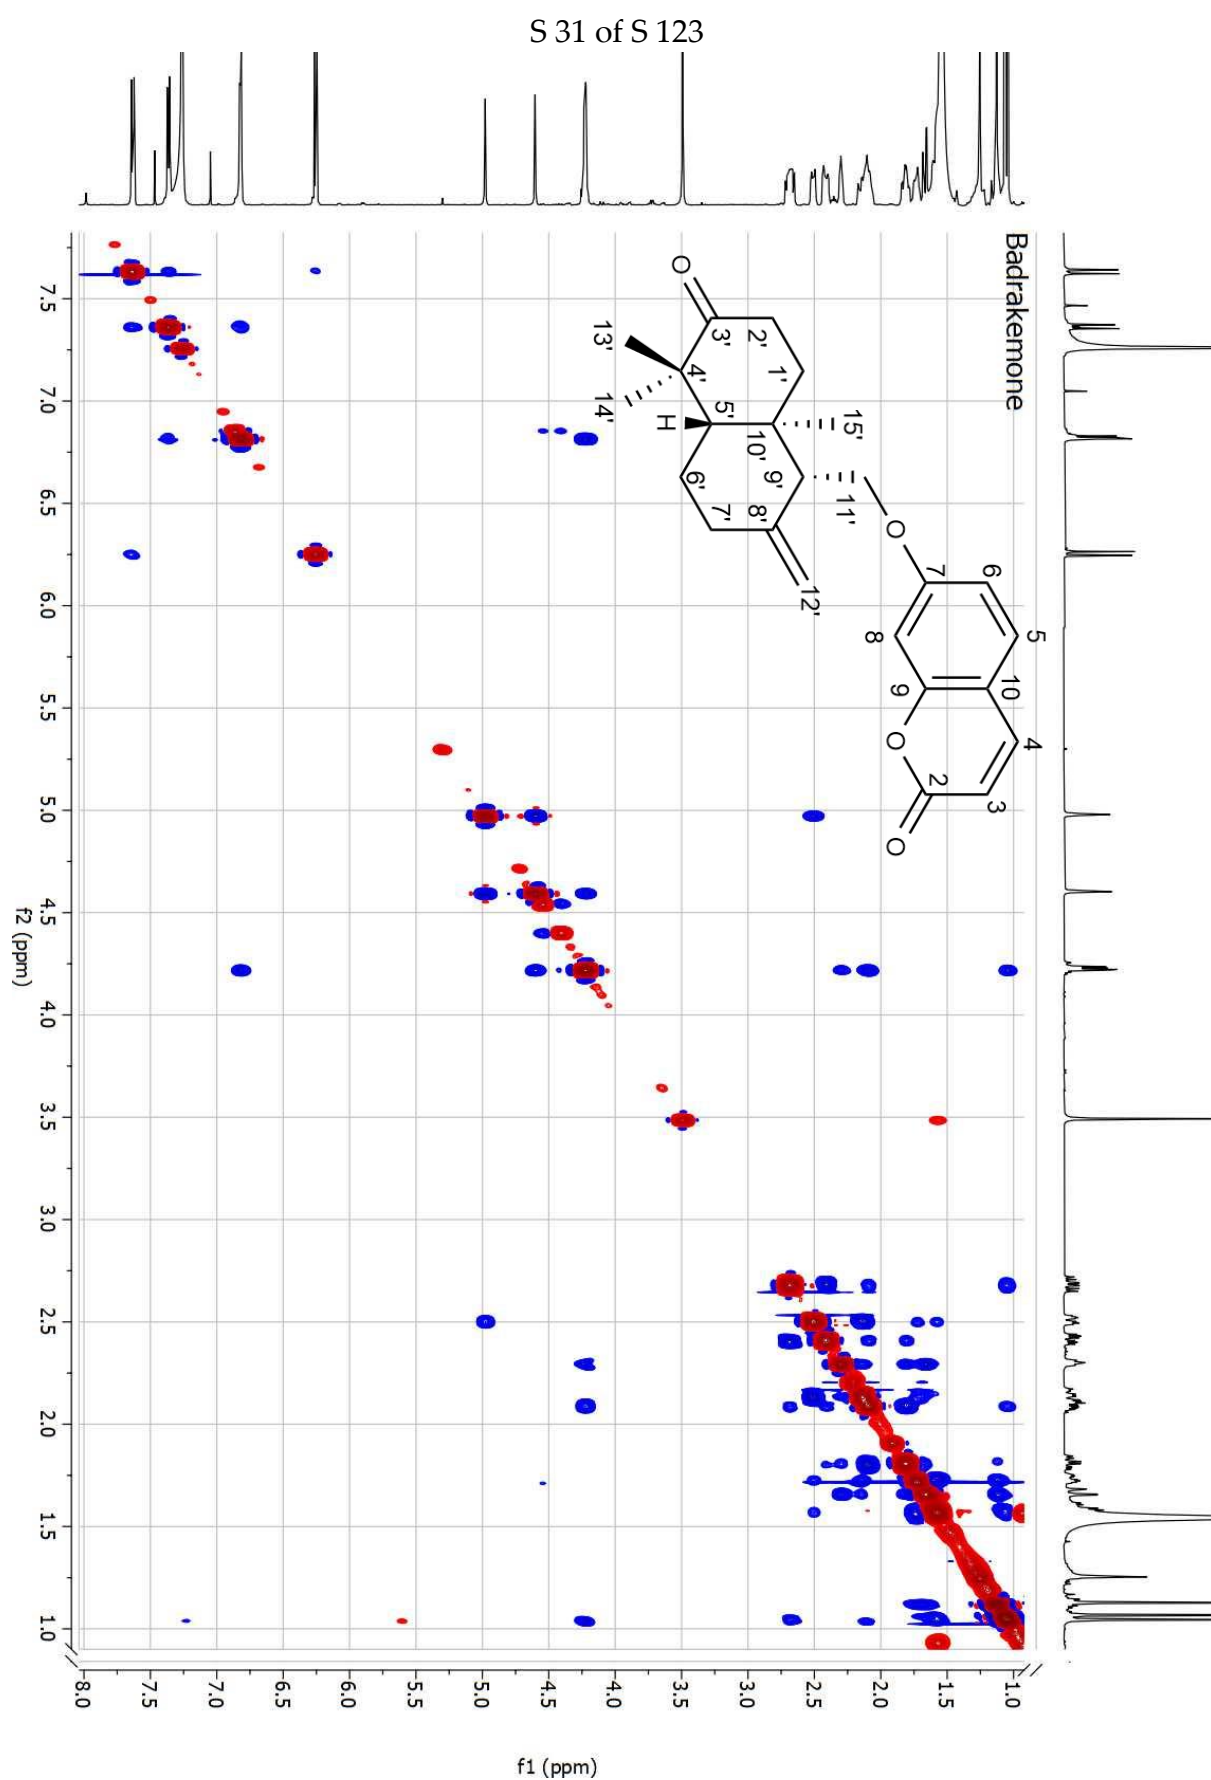

**Figure S25.** NOESY spectrum (CDCl<sub>3</sub>) of badrakemone (4)

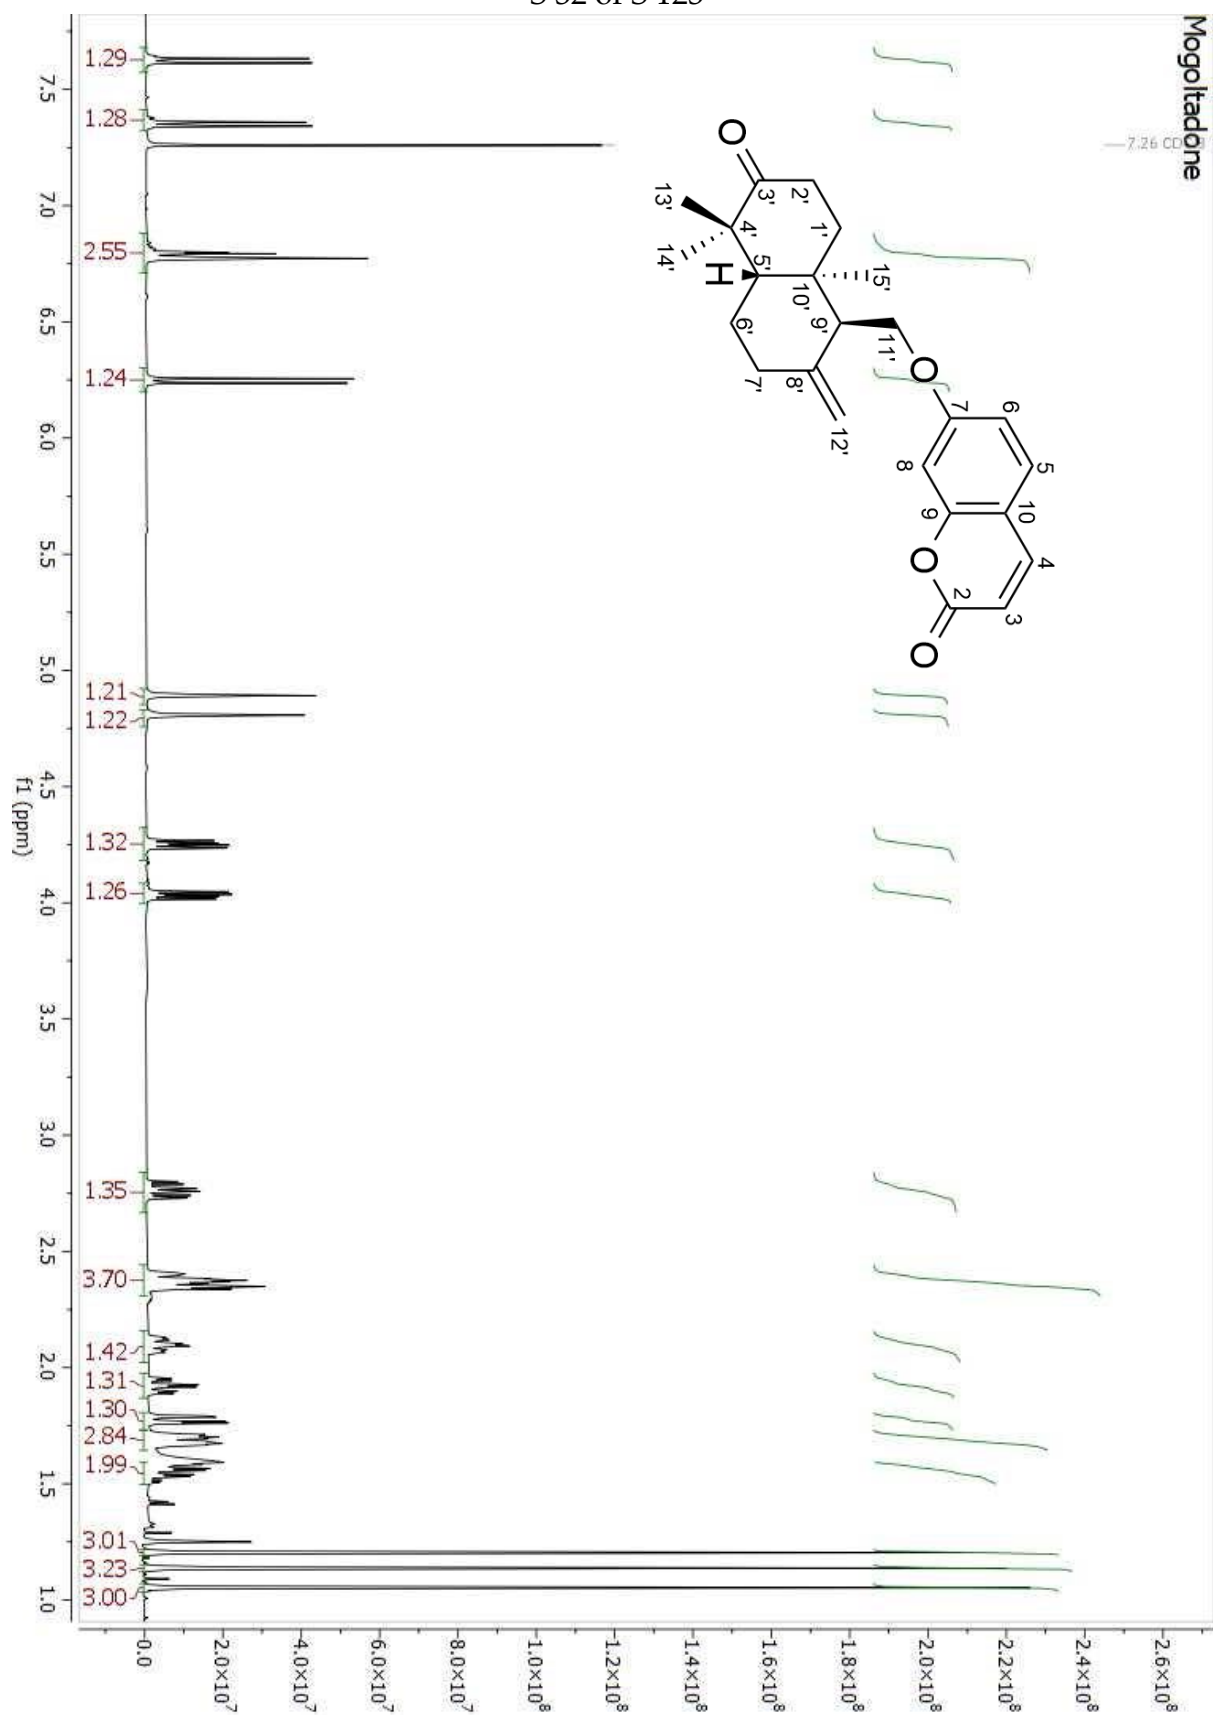

**Figure S26.** <sup>1</sup>H-NMR spectrum (500 MHz, CDCl<sub>3</sub>) of mogoltadone (5)

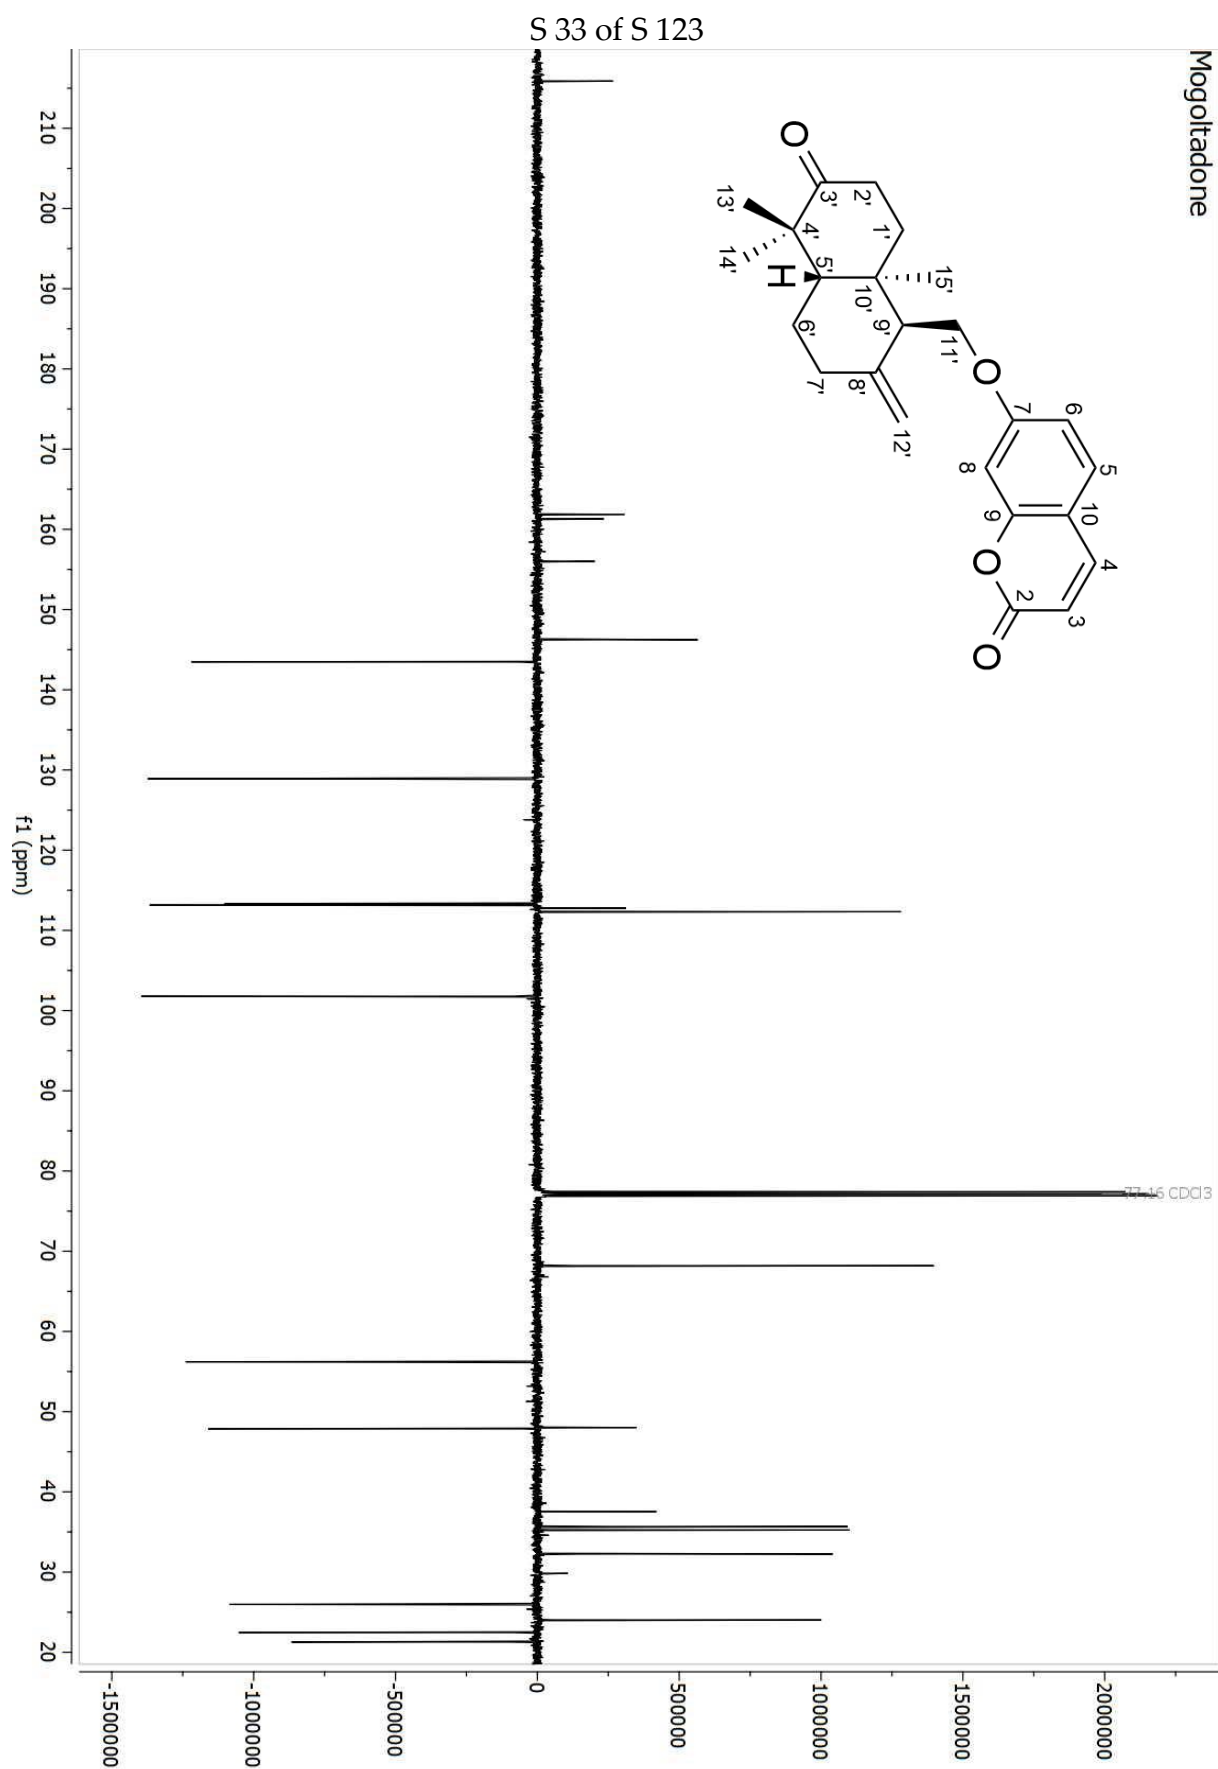

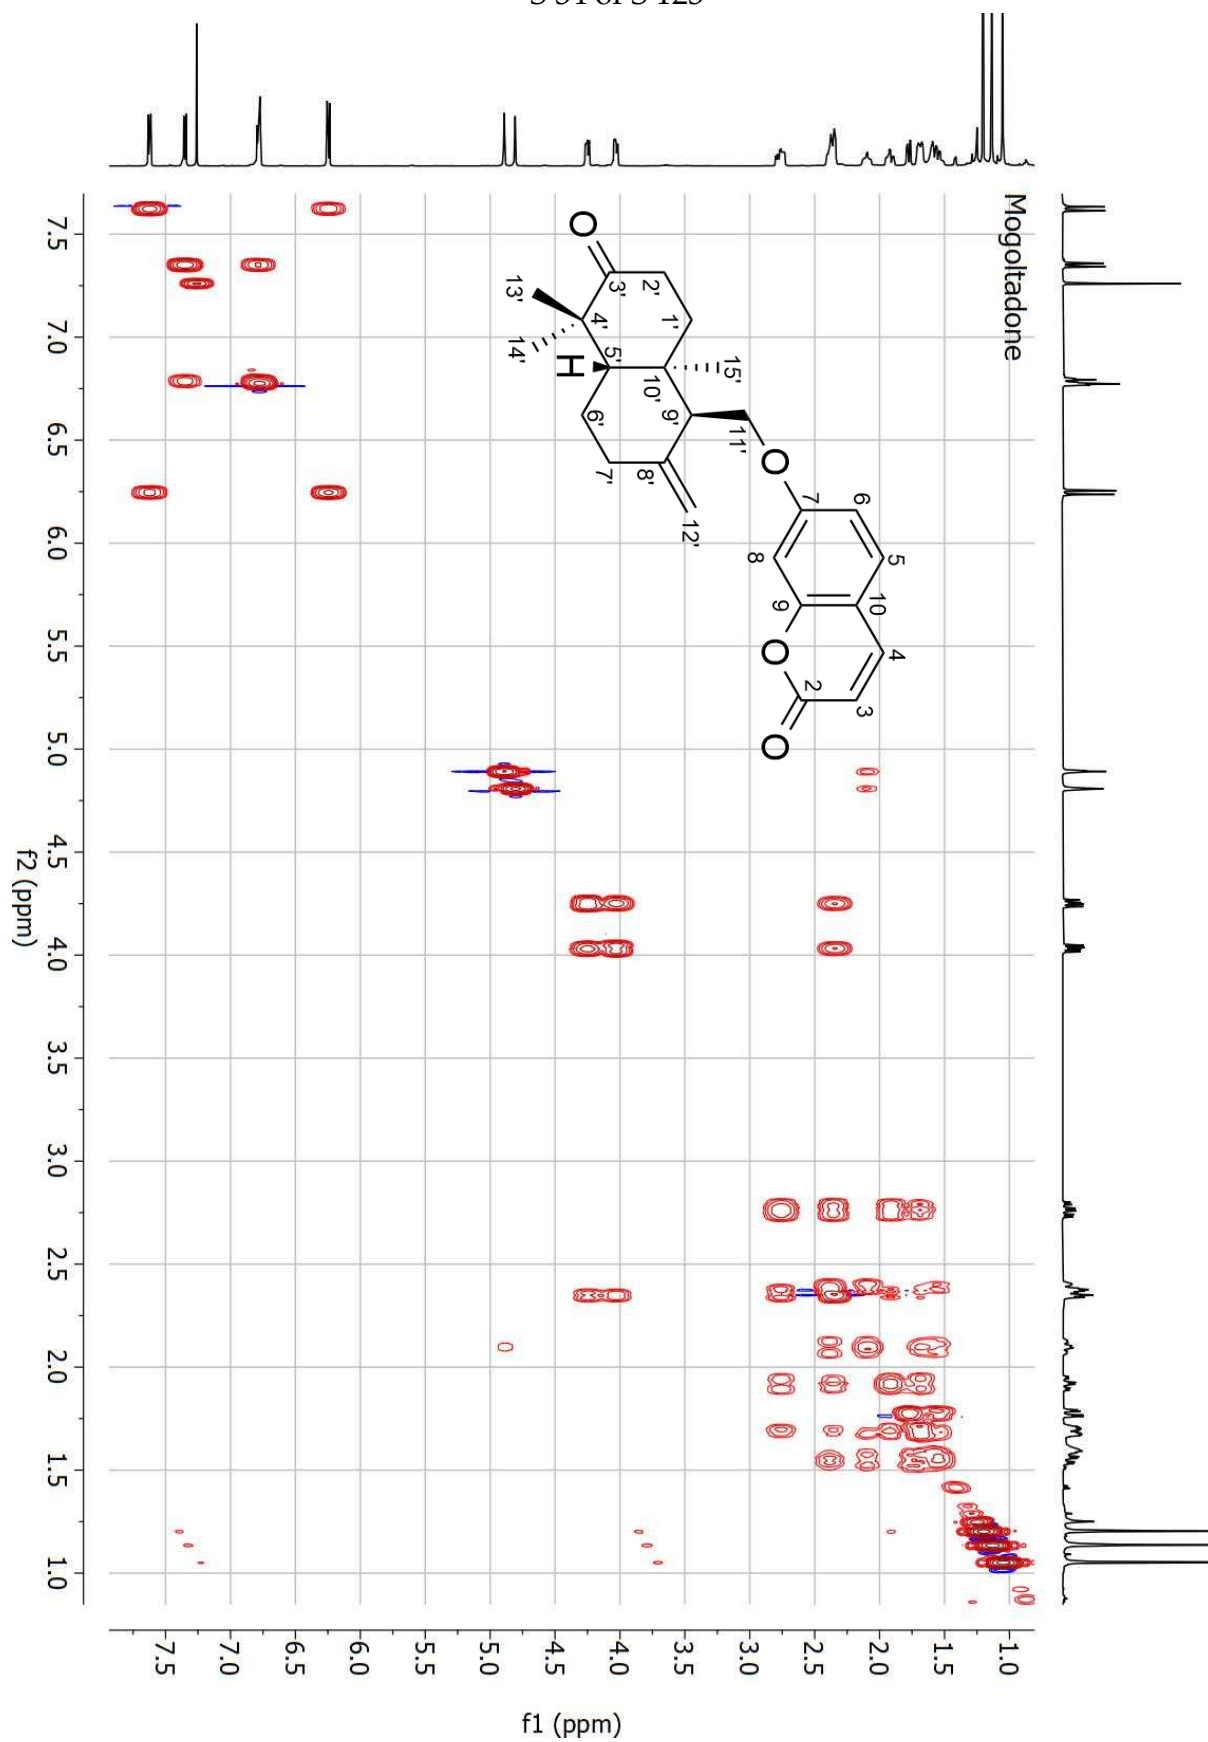

**Figure S28.**  $^1\text{H}$ - $^1\text{H}$  COSY spectrum ( $\text{CDCl}_3$ ) of mogoltadone (5)

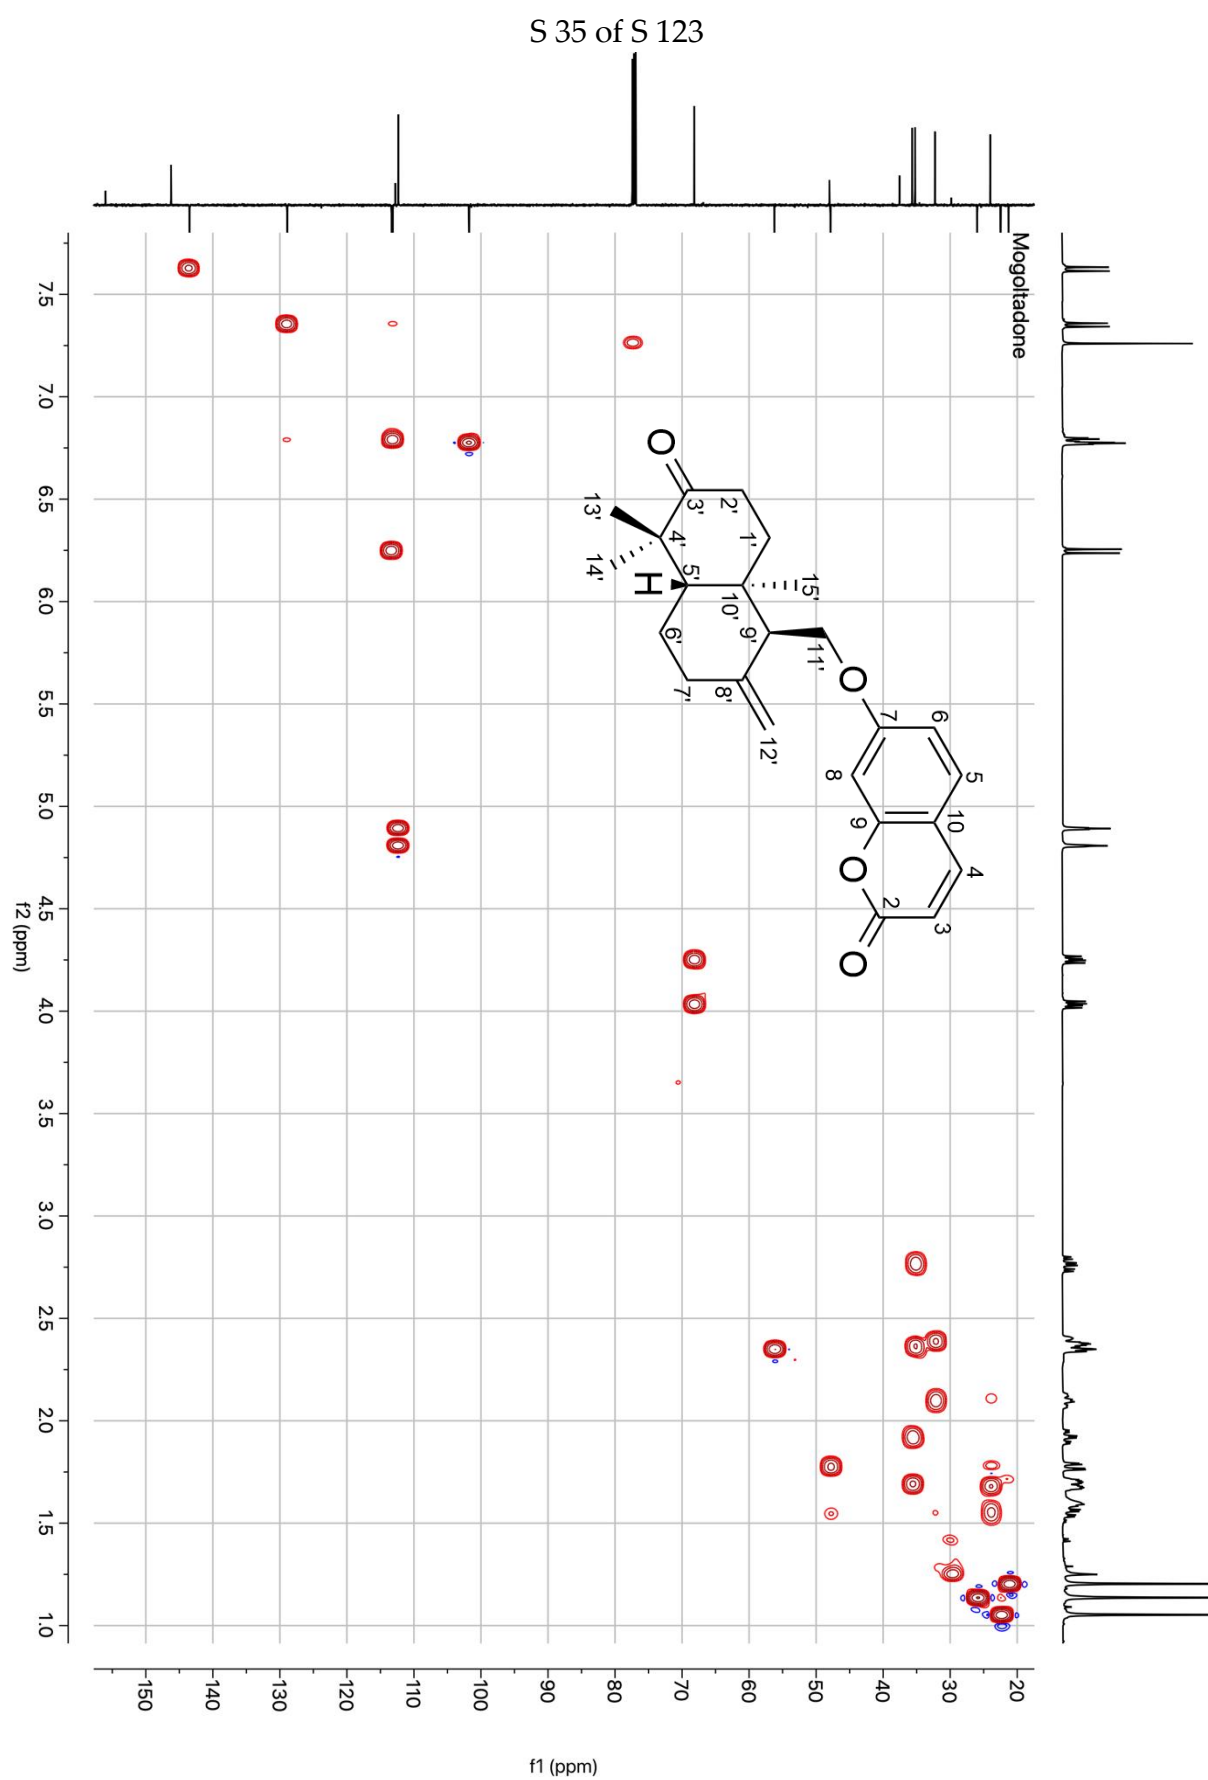

**Figure S29.** HSQC spectrum (CDCl<sub>3</sub>) of mogoltadone (5)

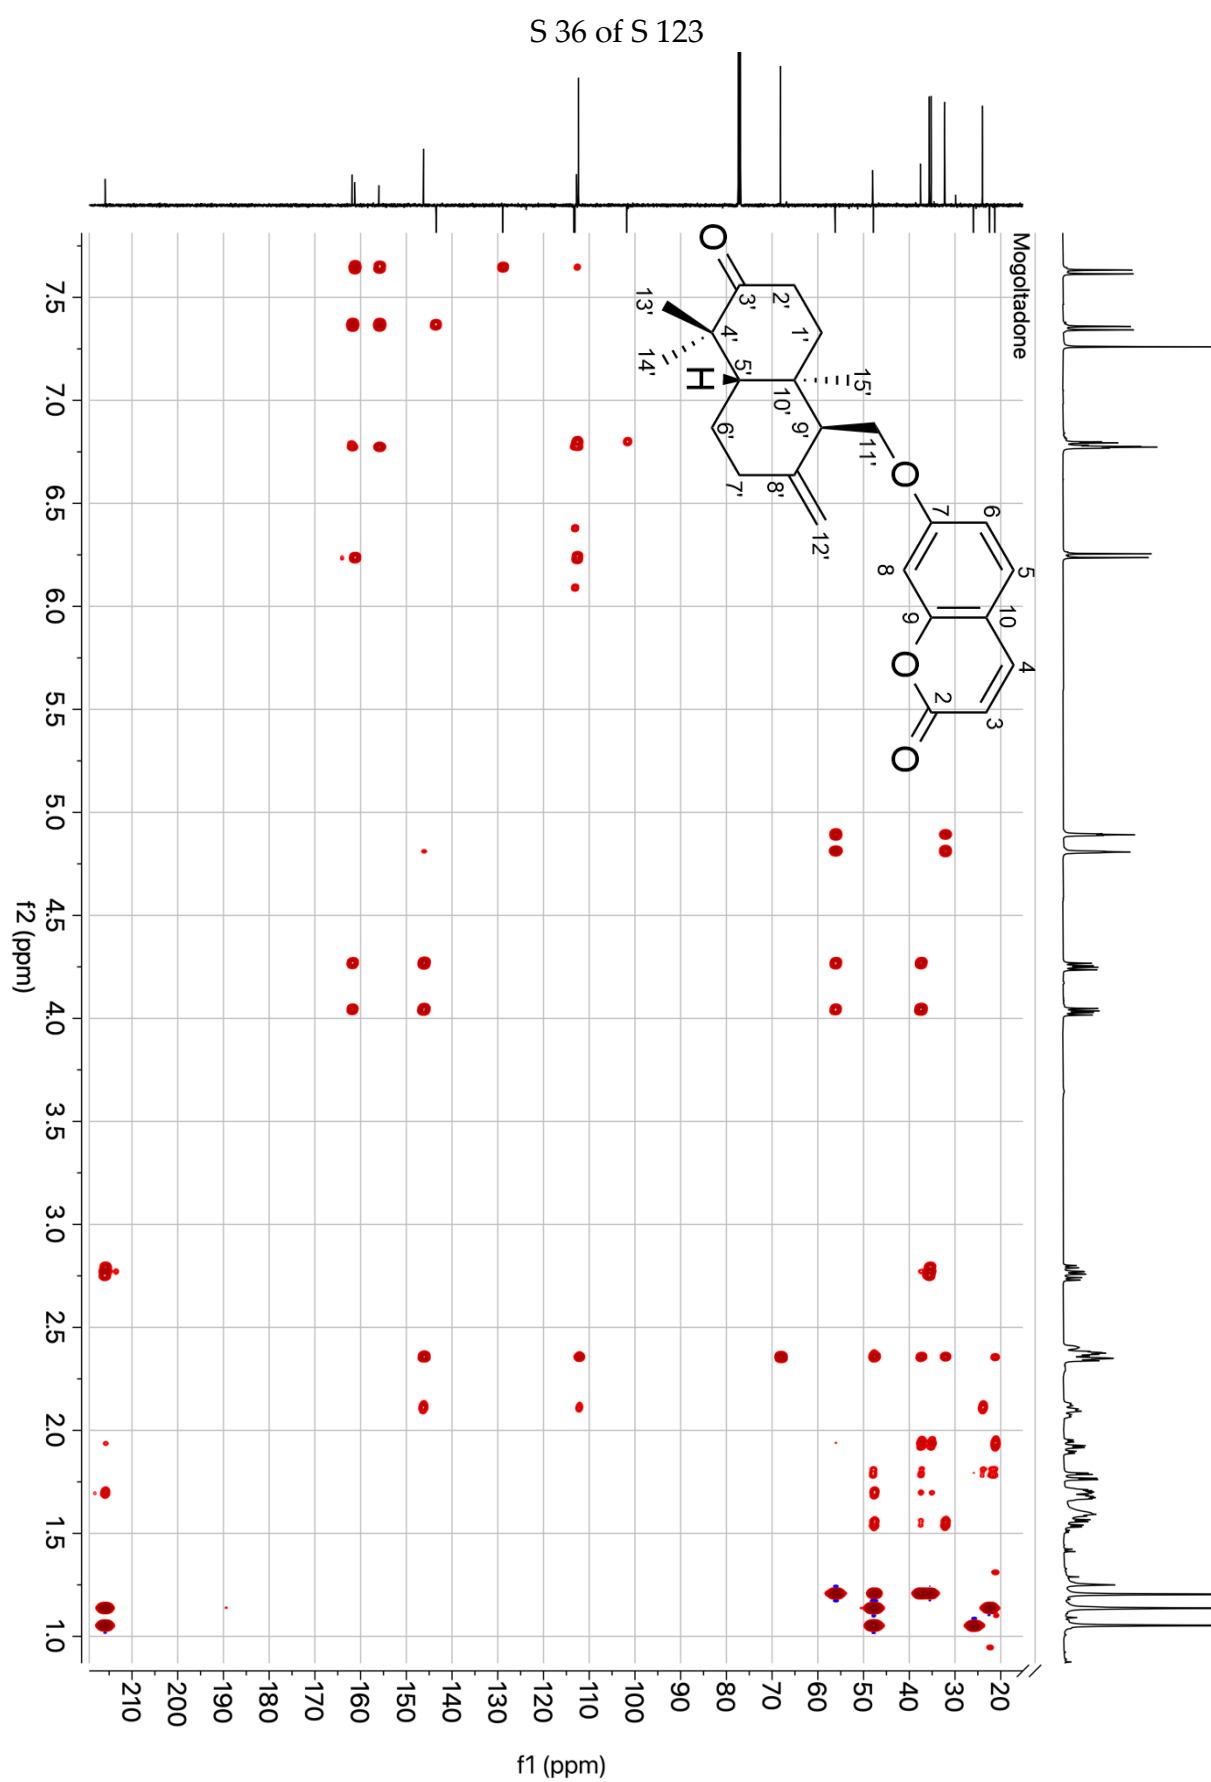

**Figure S30.** HMBC spectrum (CDCl<sub>3</sub>) of mogoltadone (5)



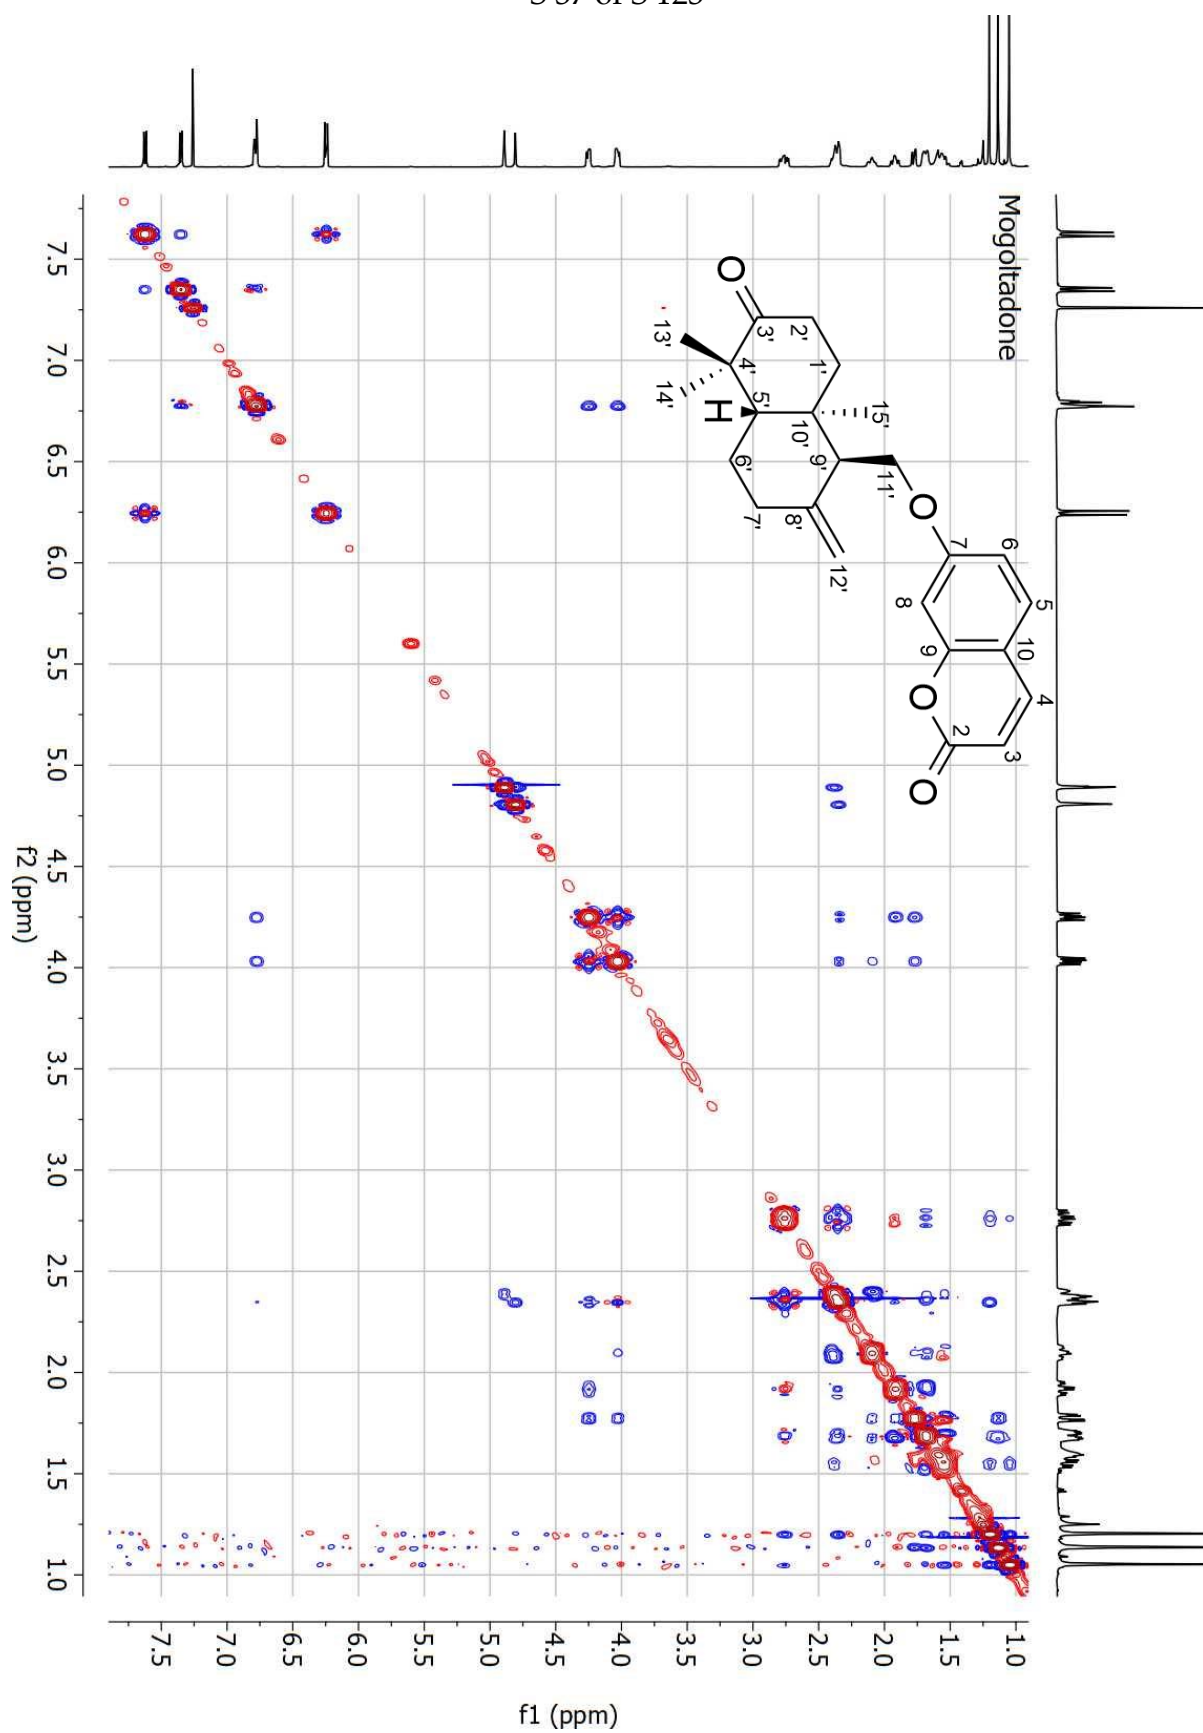**Figure S31.** NOESY spectrum (CDCl<sub>3</sub>) of mogoltadone (5)

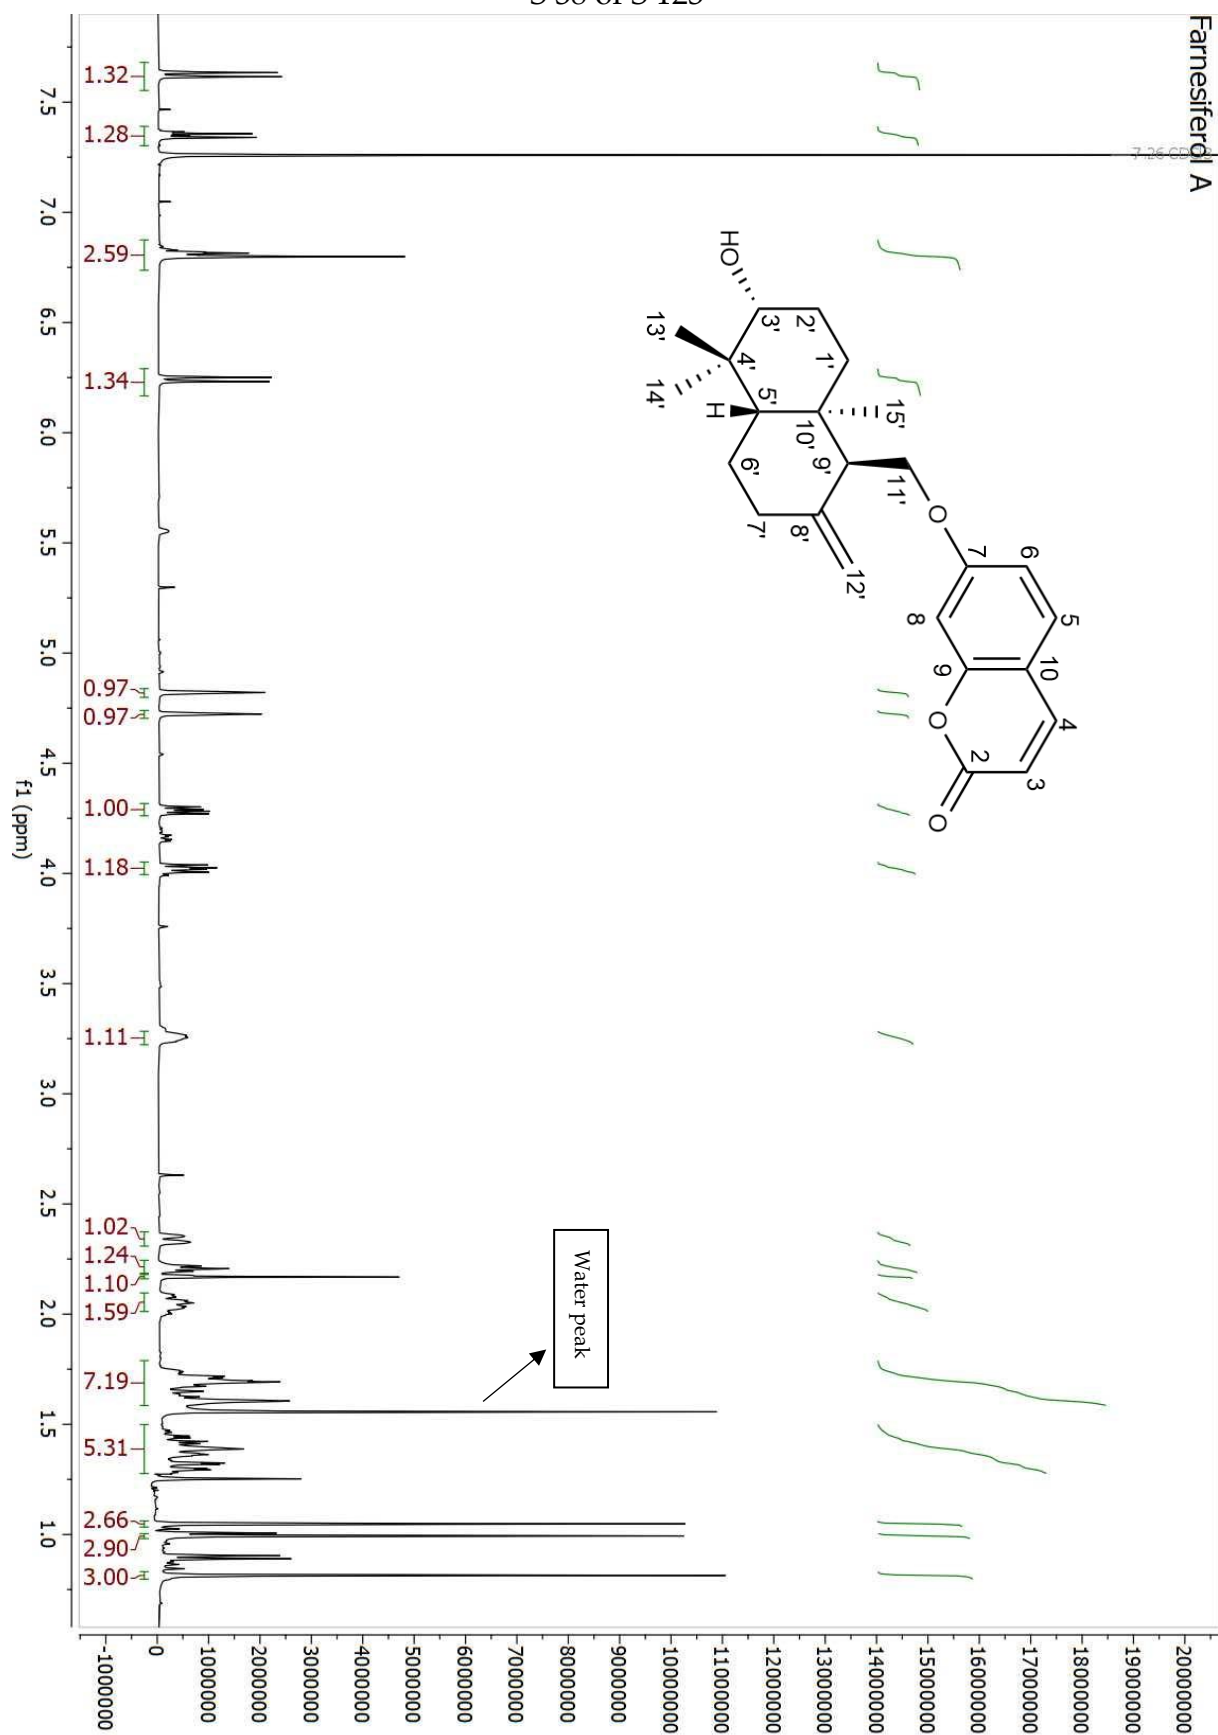

**Figure S32.**  $^1\text{H}$ -NMR spectrum (500 MHz,  $\text{CDCl}_3$ ) of farnesiferol A (6)

S 39 of S 123

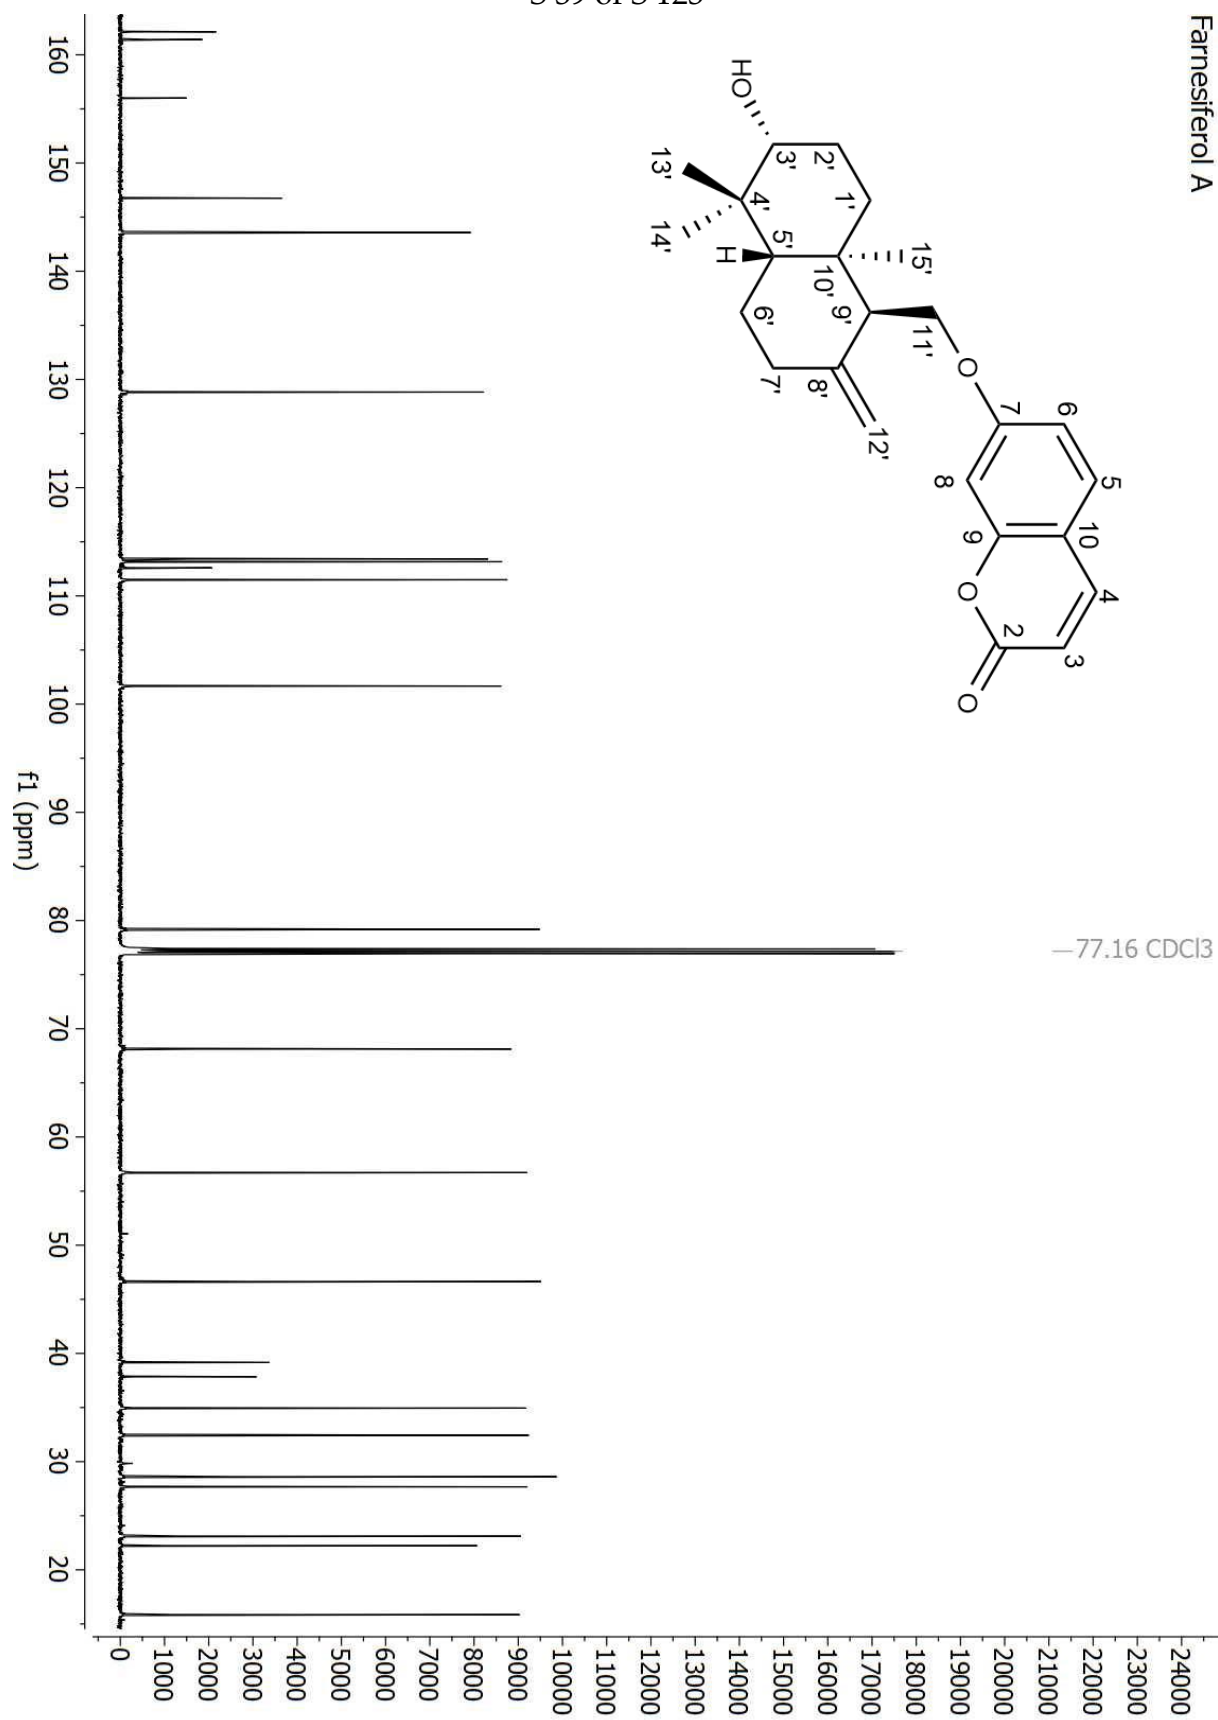**Figure S33.**  $^{13}\text{C}$ -NMR spectrum (125 MHz,  $\text{CDCl}_3$ ) of farnesiferol A (6)

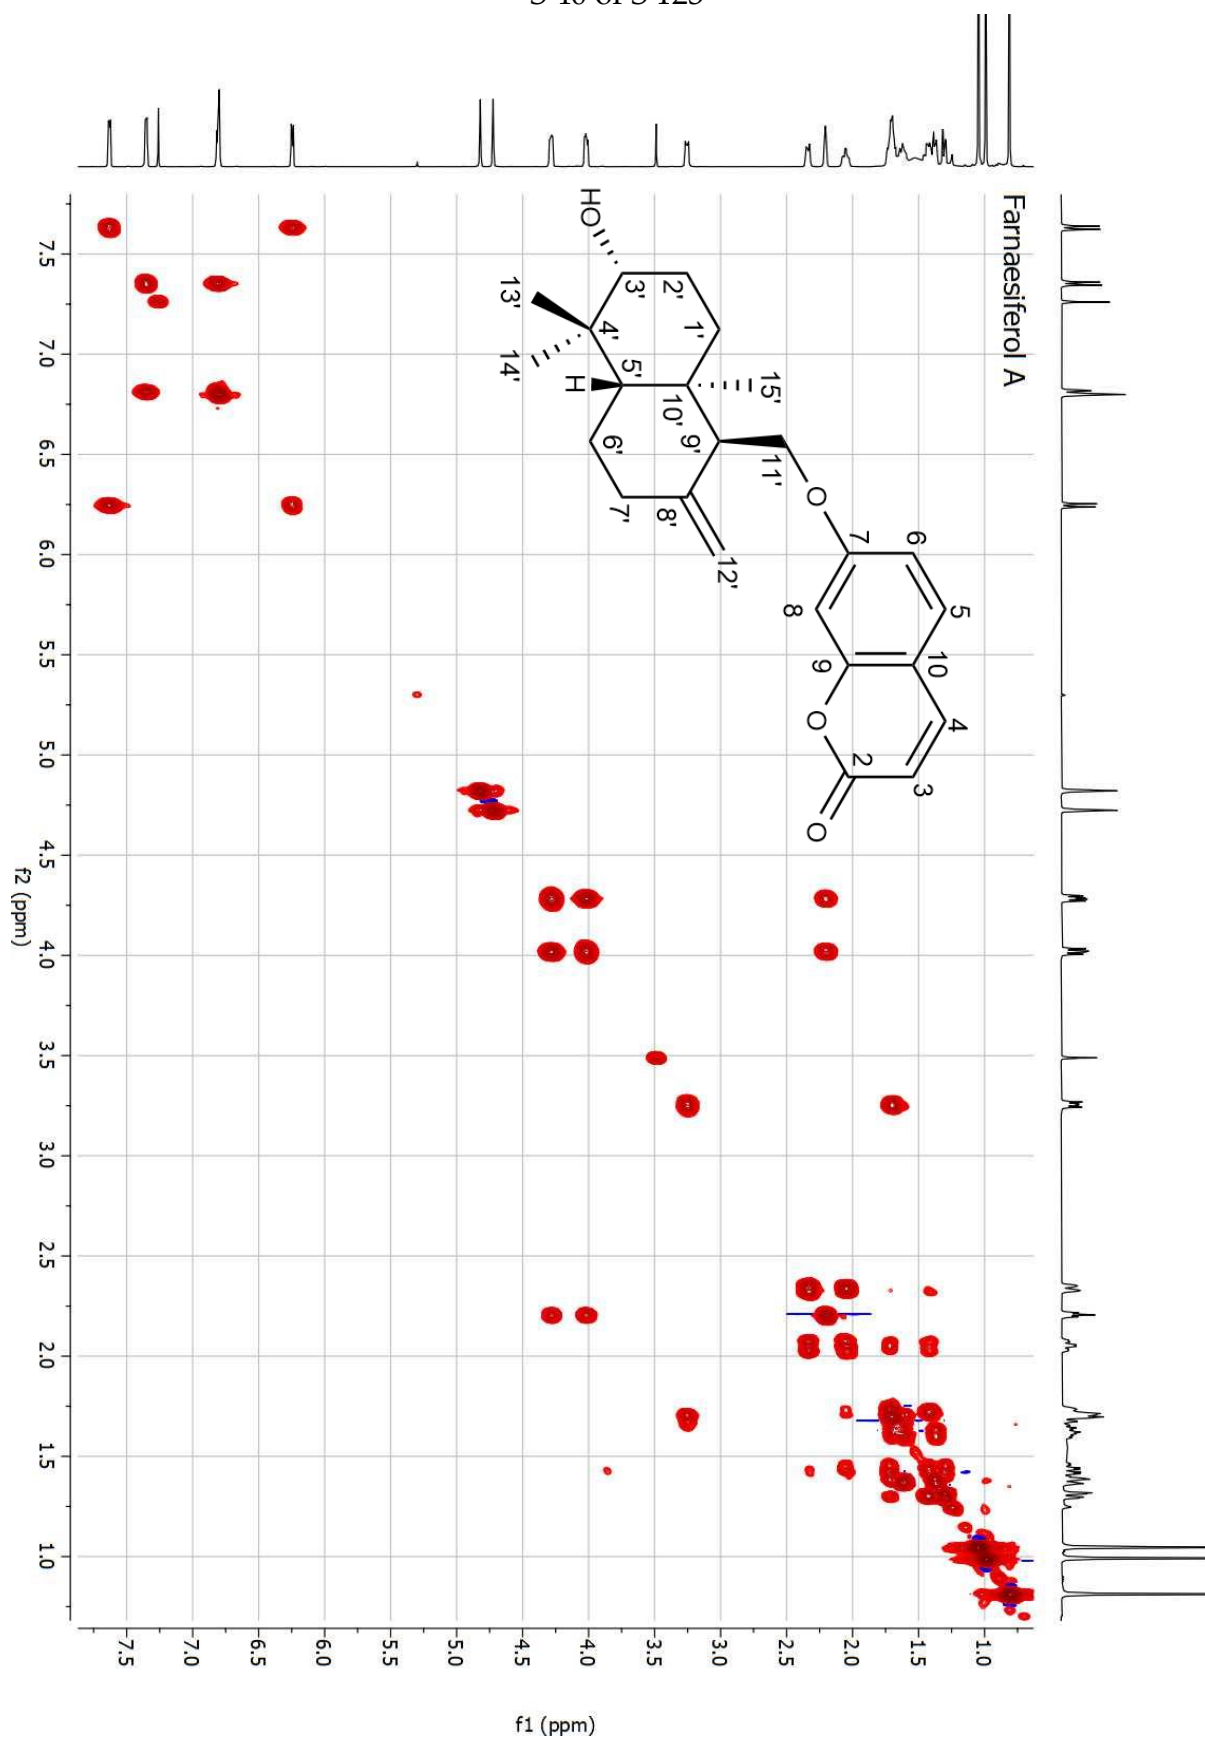

**Figure S34.**  $^1\text{H}$ - $^1\text{H}$  COSY spectrum ( $\text{CDCl}_3$ ) of farnesiferol A (6)

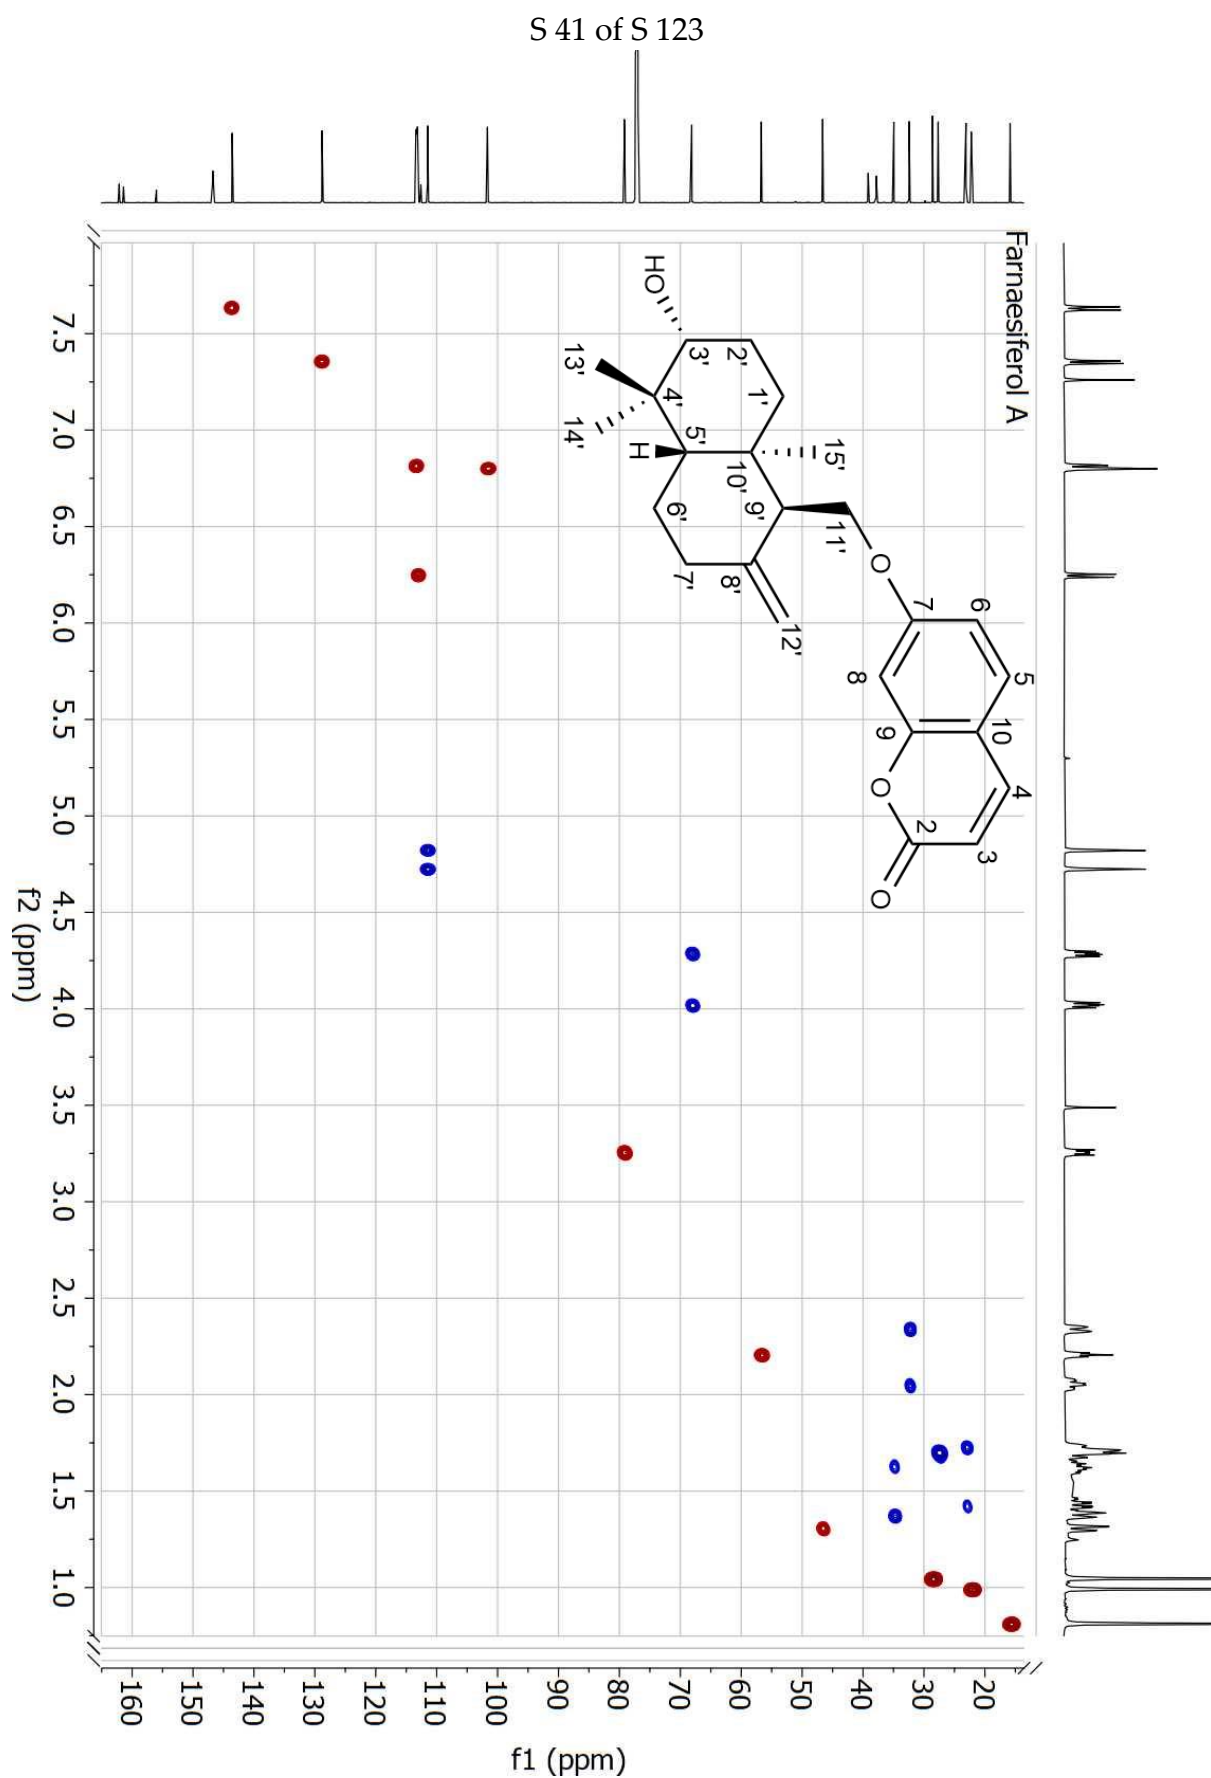

**Figure S35.** HSQC spectrum ( $\text{CDCl}_3$ ) of farnesiferol A (6)

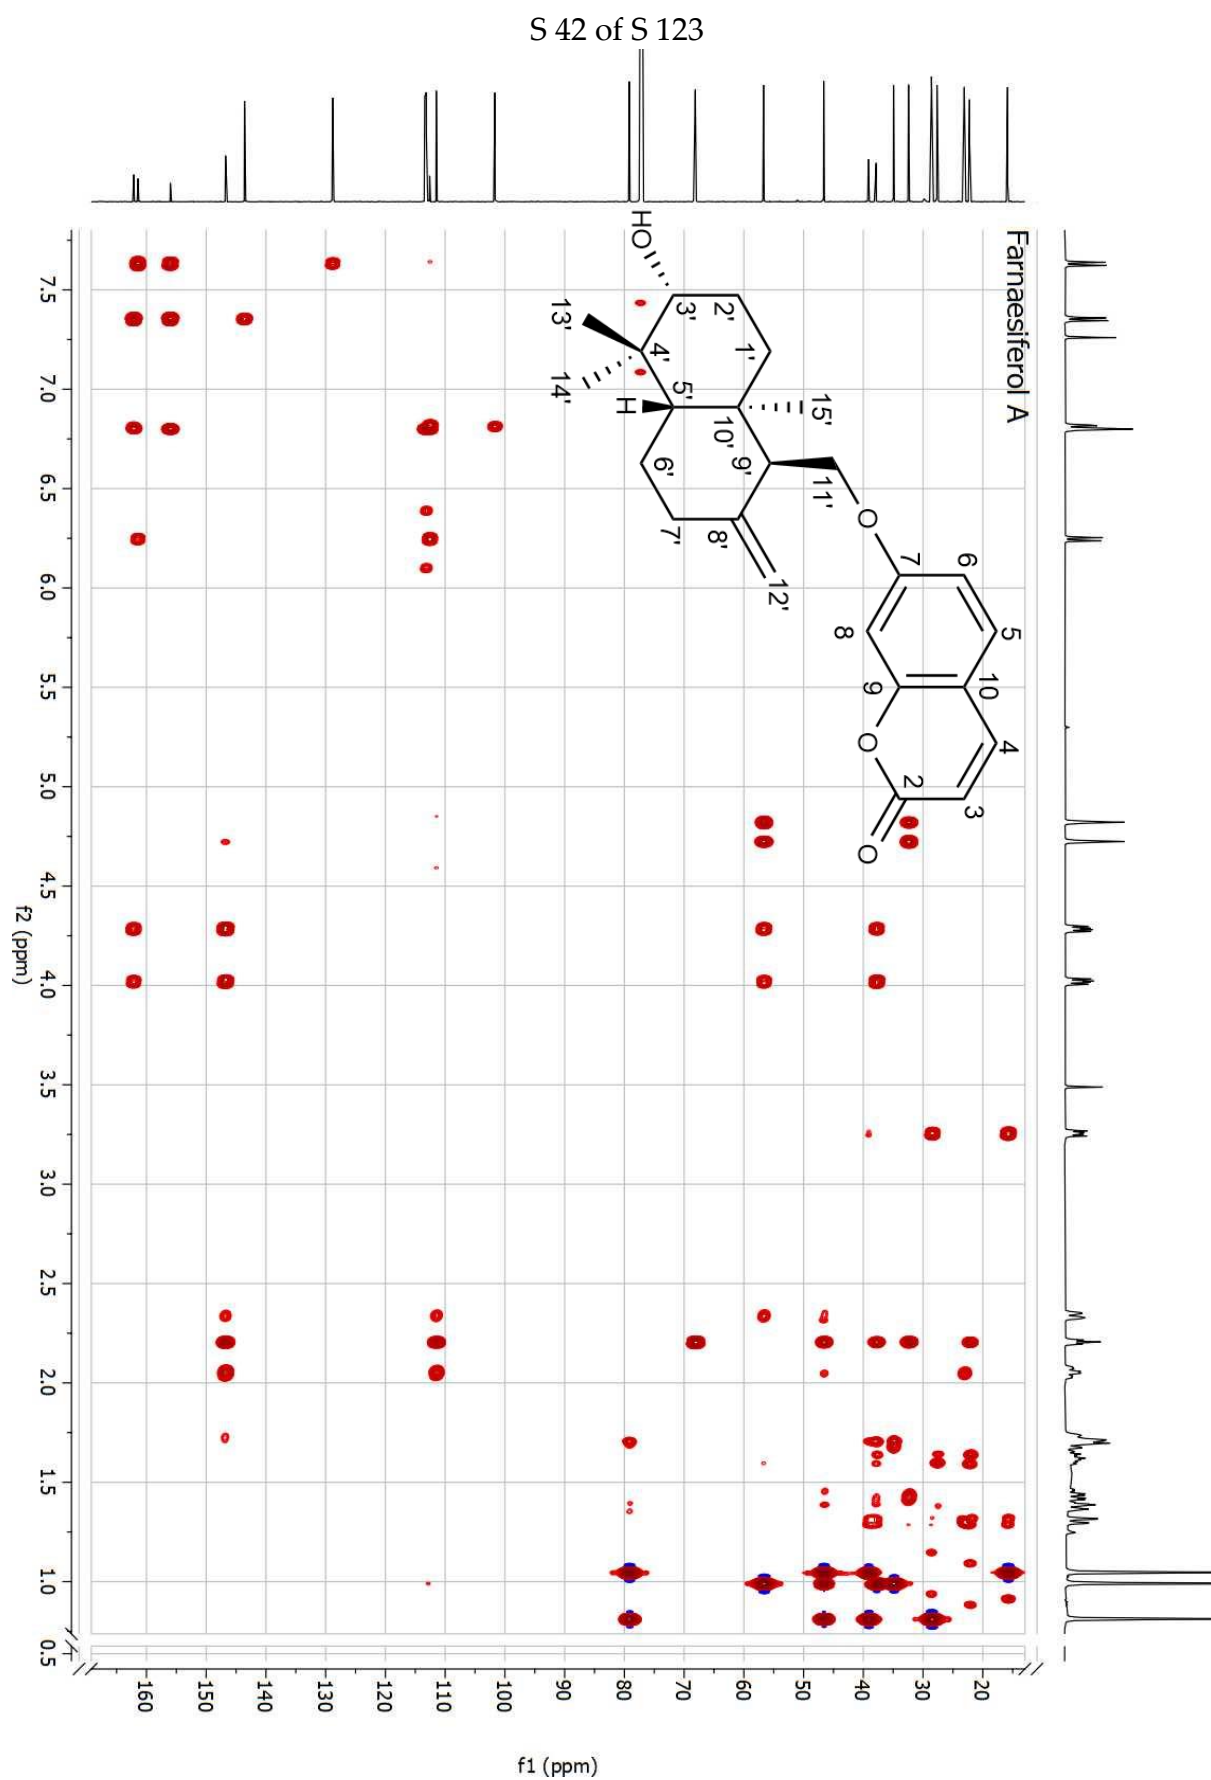

**Figure S36.** HMBC spectrum (CDCl<sub>3</sub>) of farnesiferol A (6)

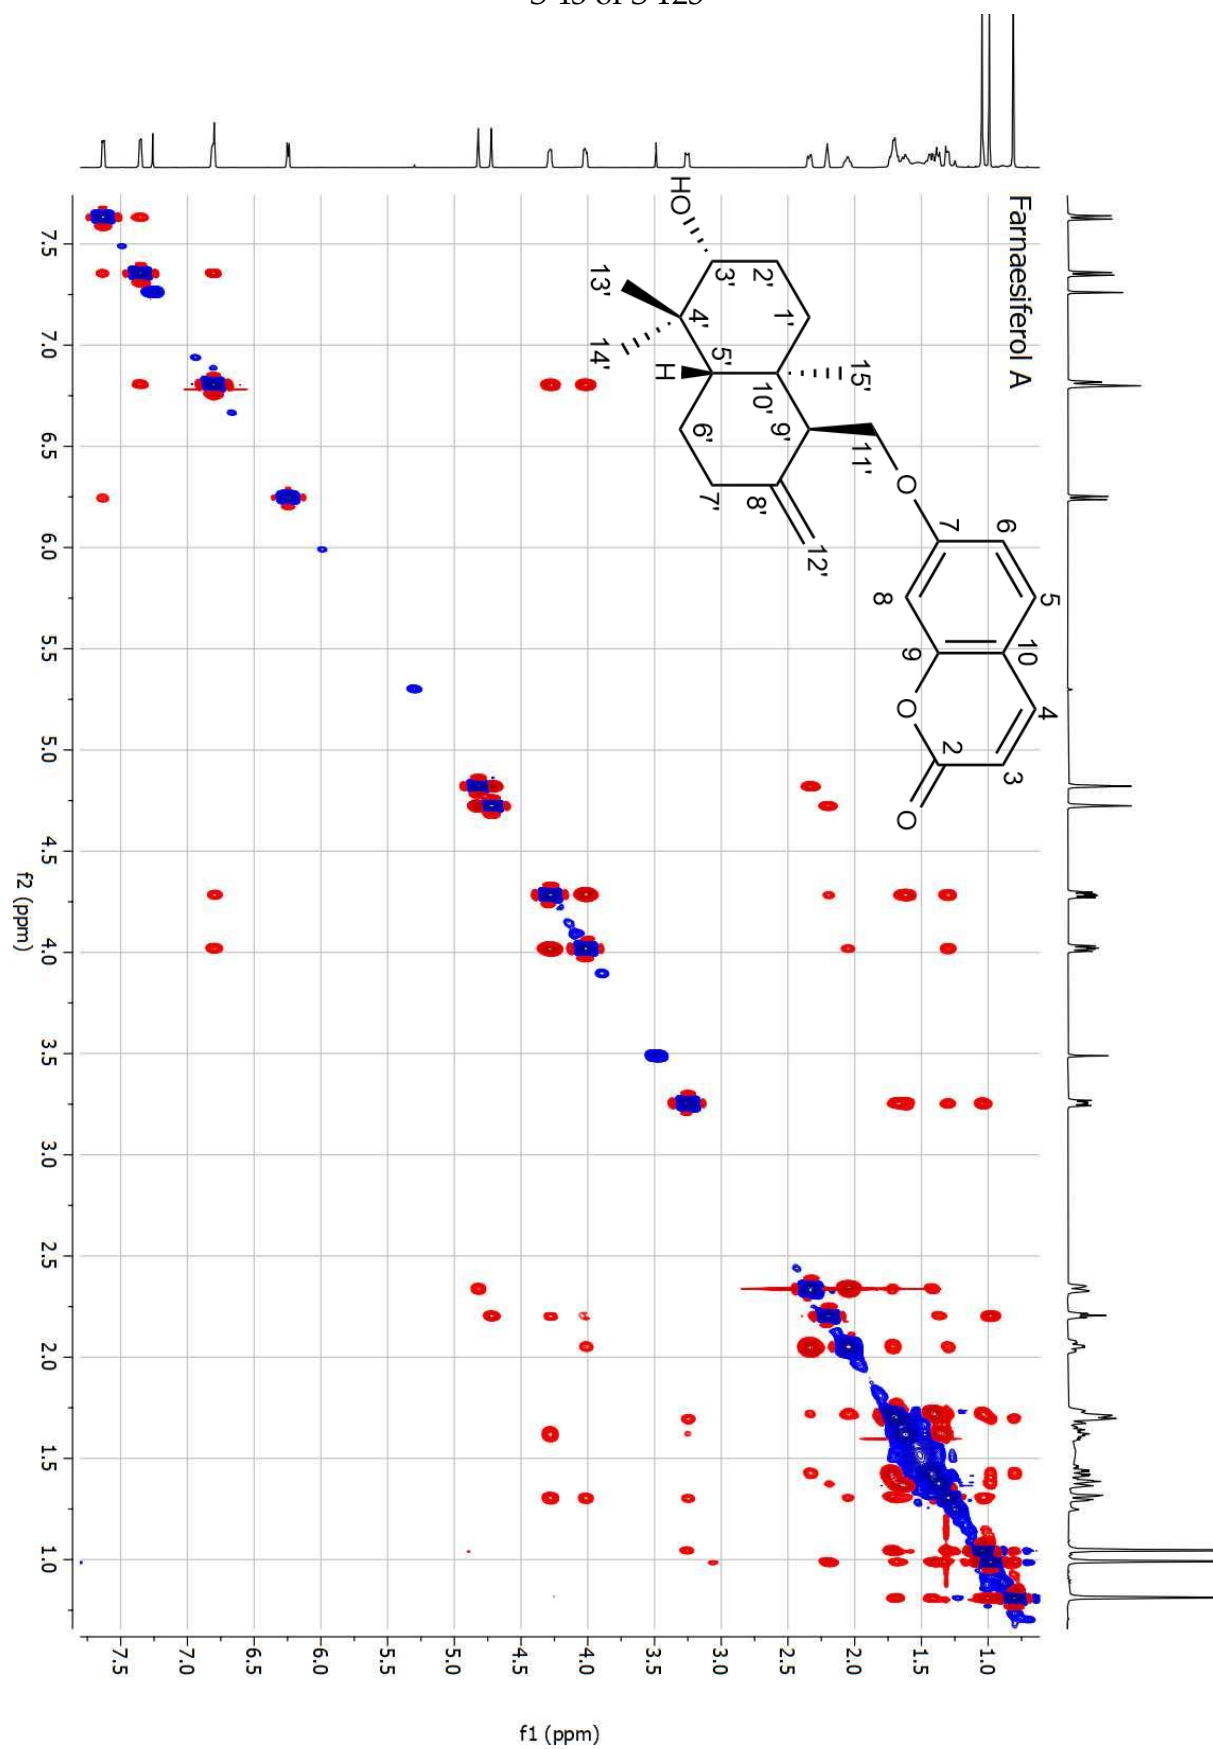

**Figure S37.** NOESY spectrum ( $\text{CDCl}_3$ ) of farnesiferol A (6)

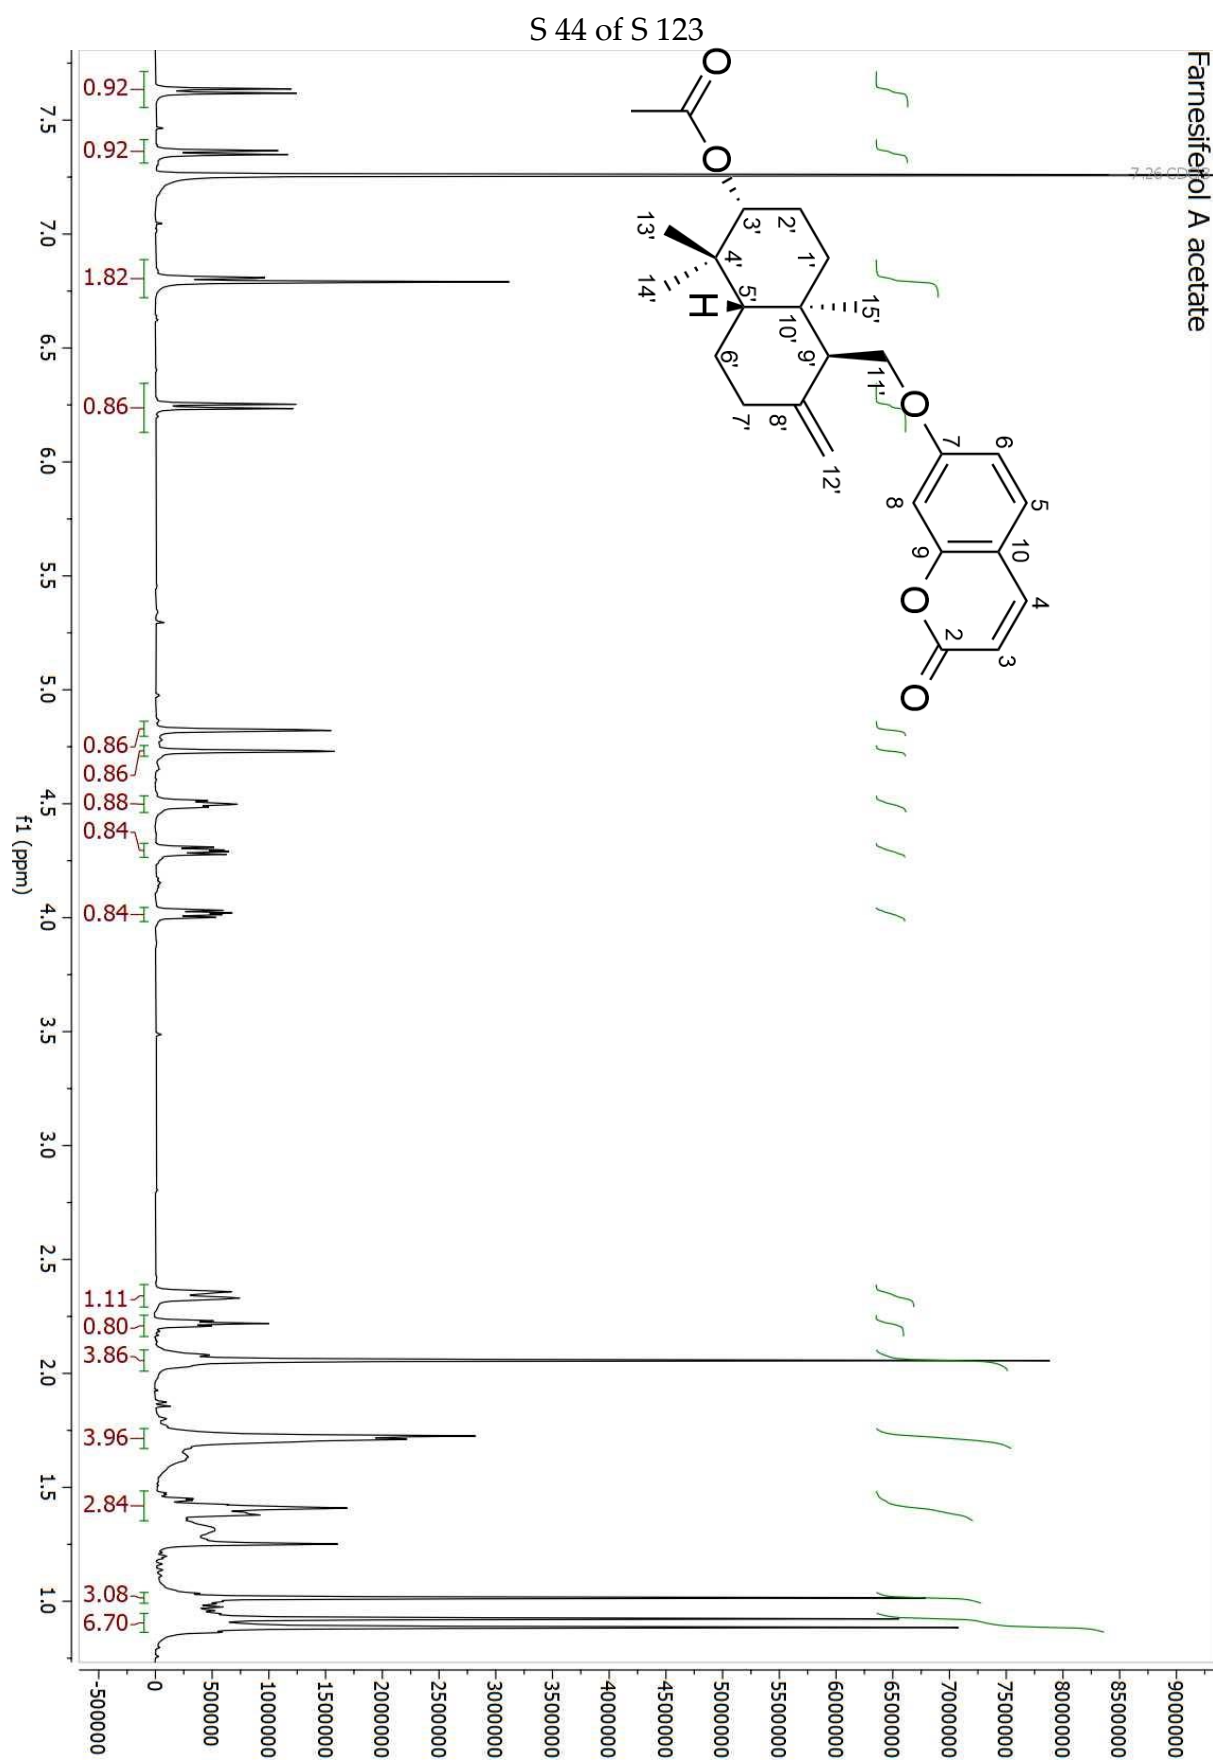

**Figure S38.**  $^1\text{H}$ -NMR spectrum (500 MHz,  $\text{CDCl}_3$ ) of farnesiferol A acetate (7)



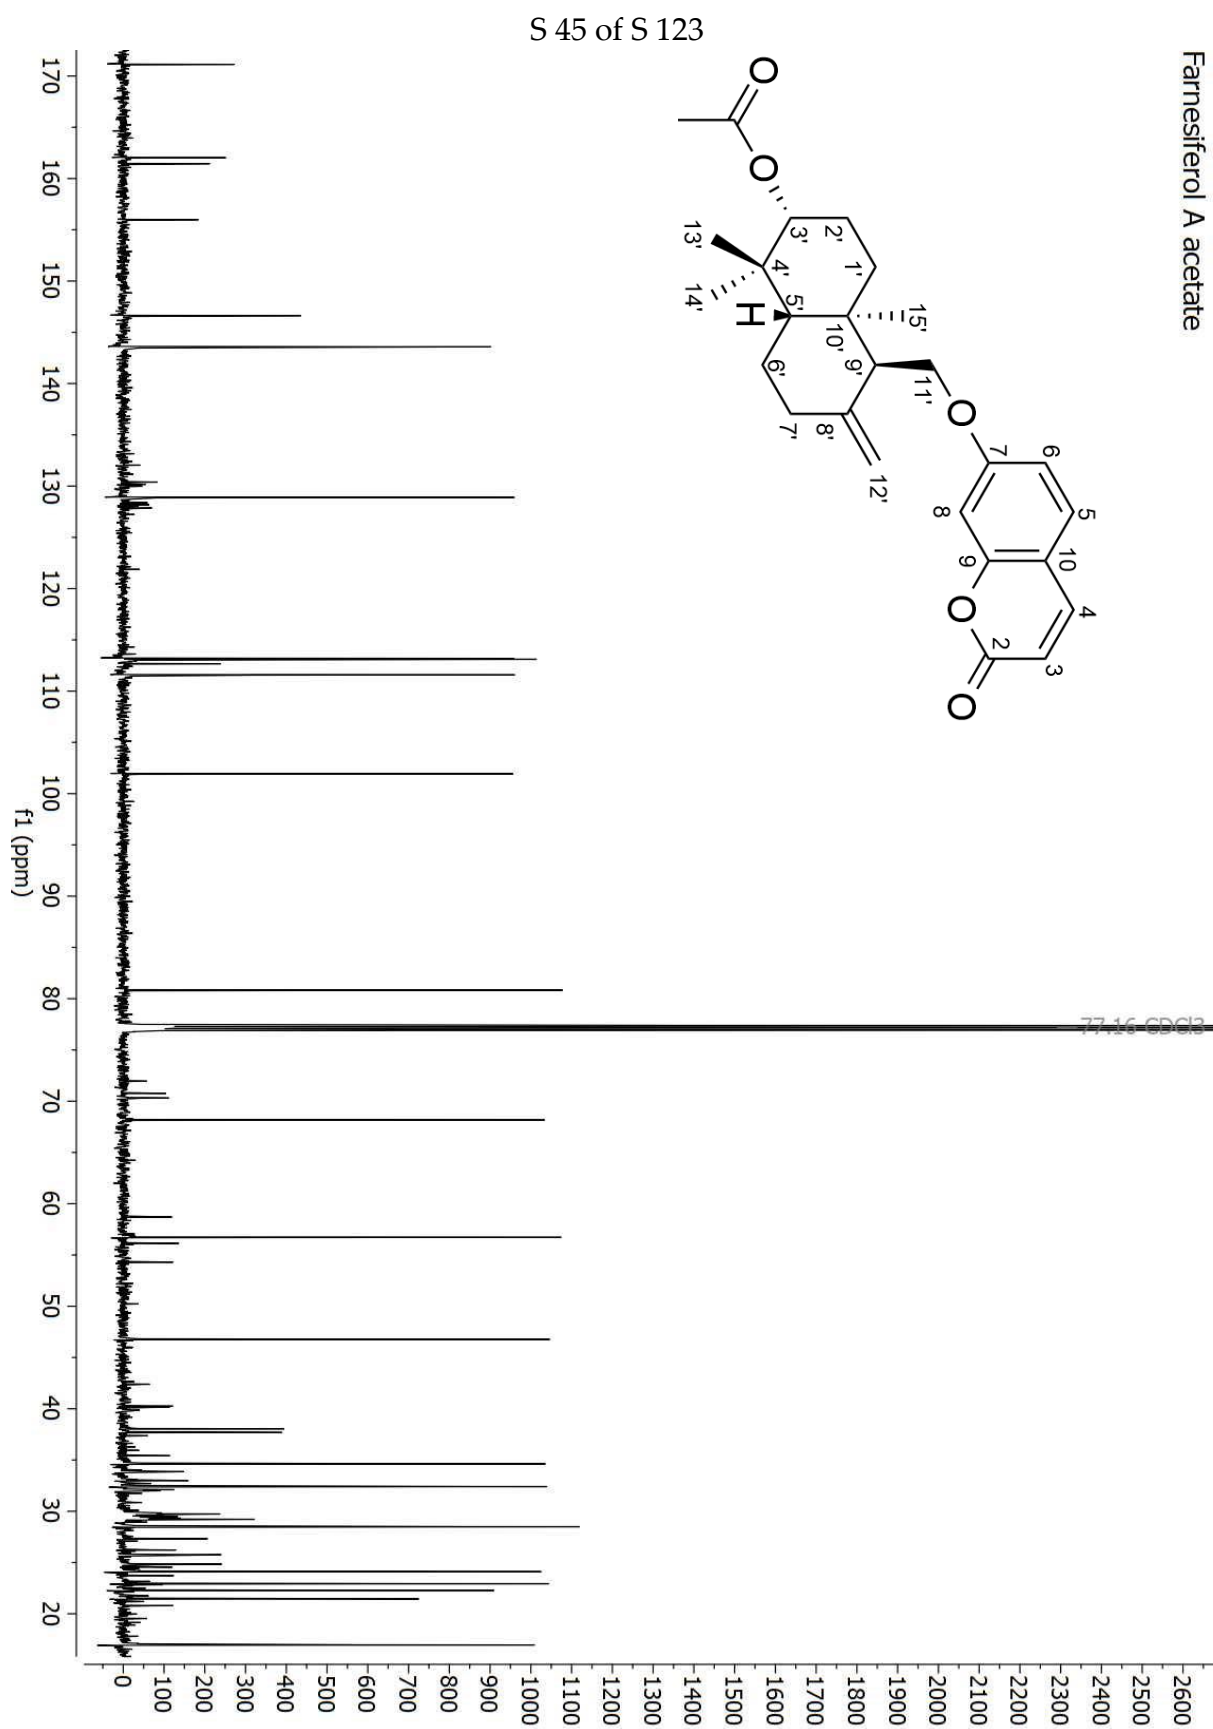

**Figure S39.**  $^{13}\text{C}$ -NMR spectrum (125 MHz,  $\text{CDCl}_3$ ) of farnesiferol A acetate (7)

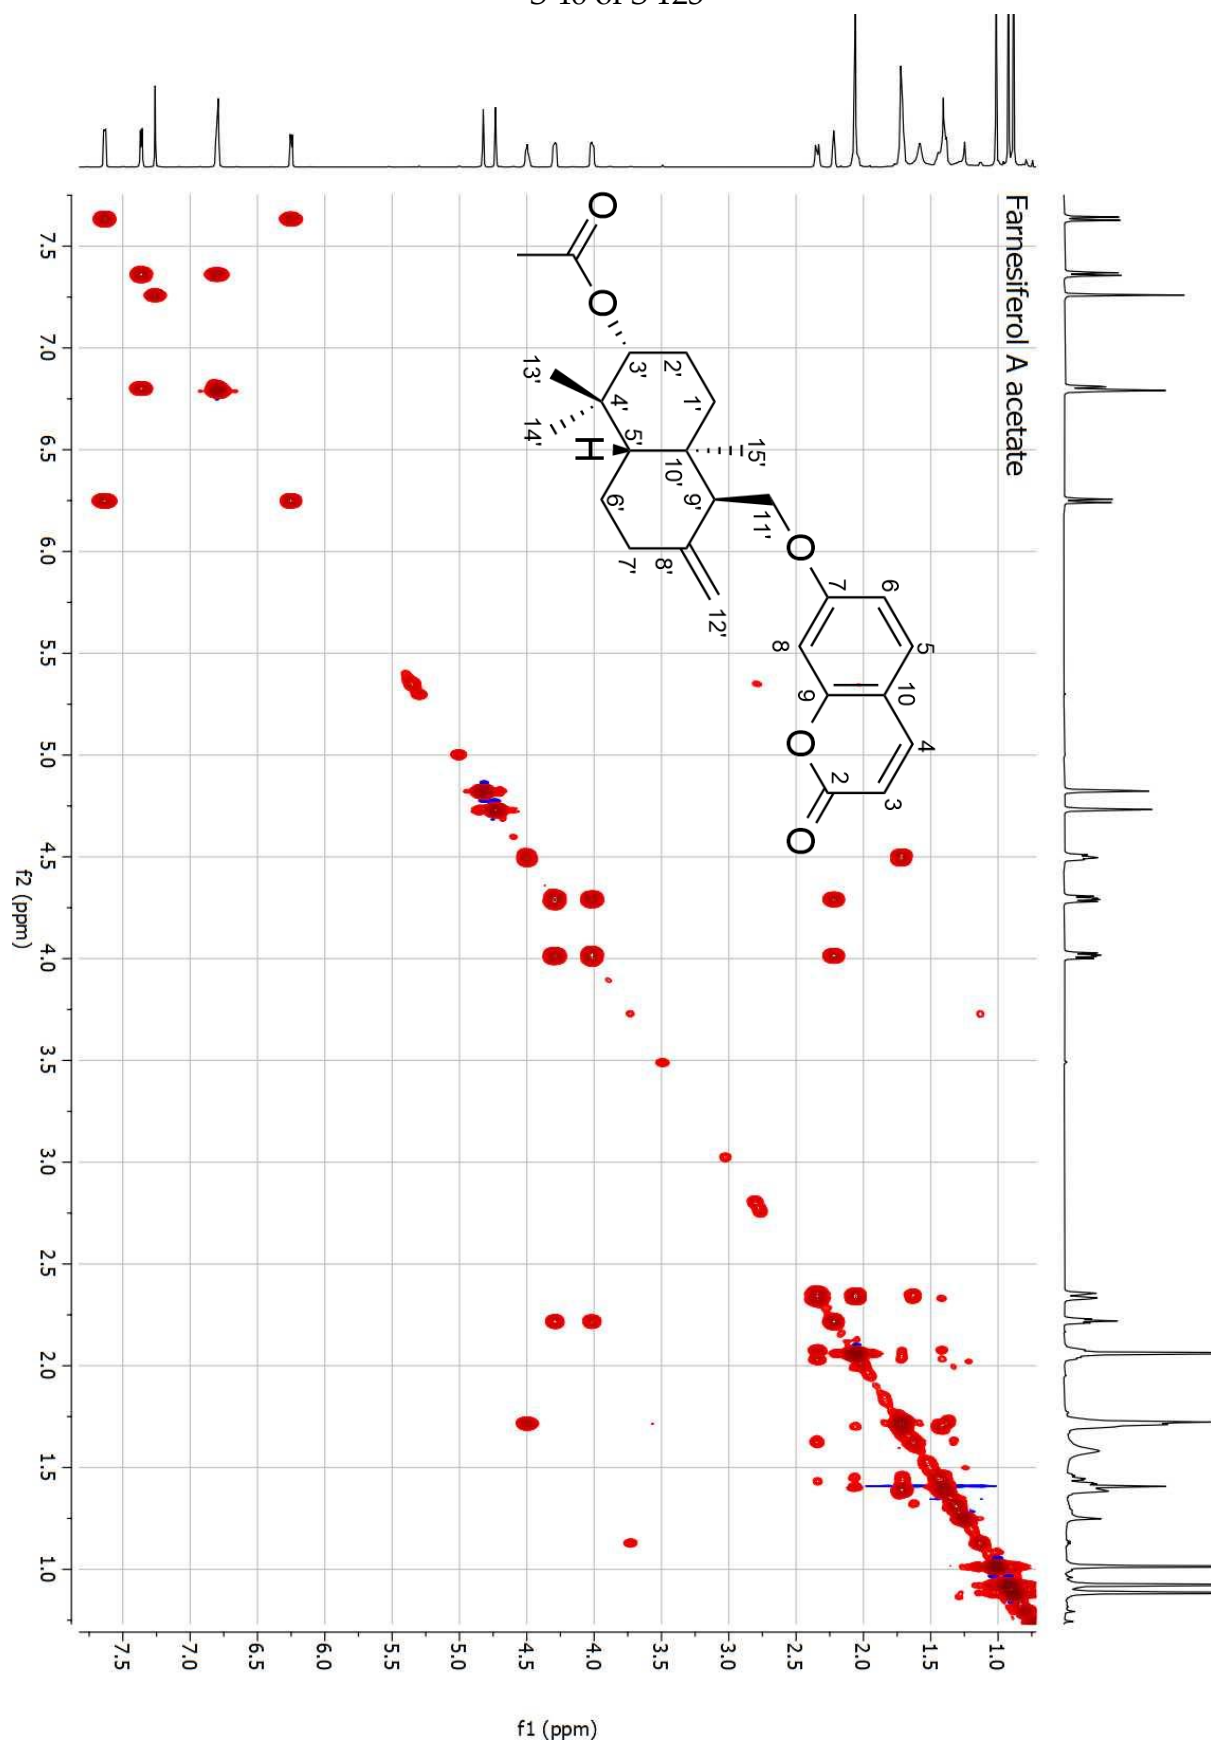

**Figure S40.**  $^1\text{H}$ - $^1\text{H}$  COSY spectrum ( $\text{CDCl}_3$ ) of farnesiferol A acetate (7)

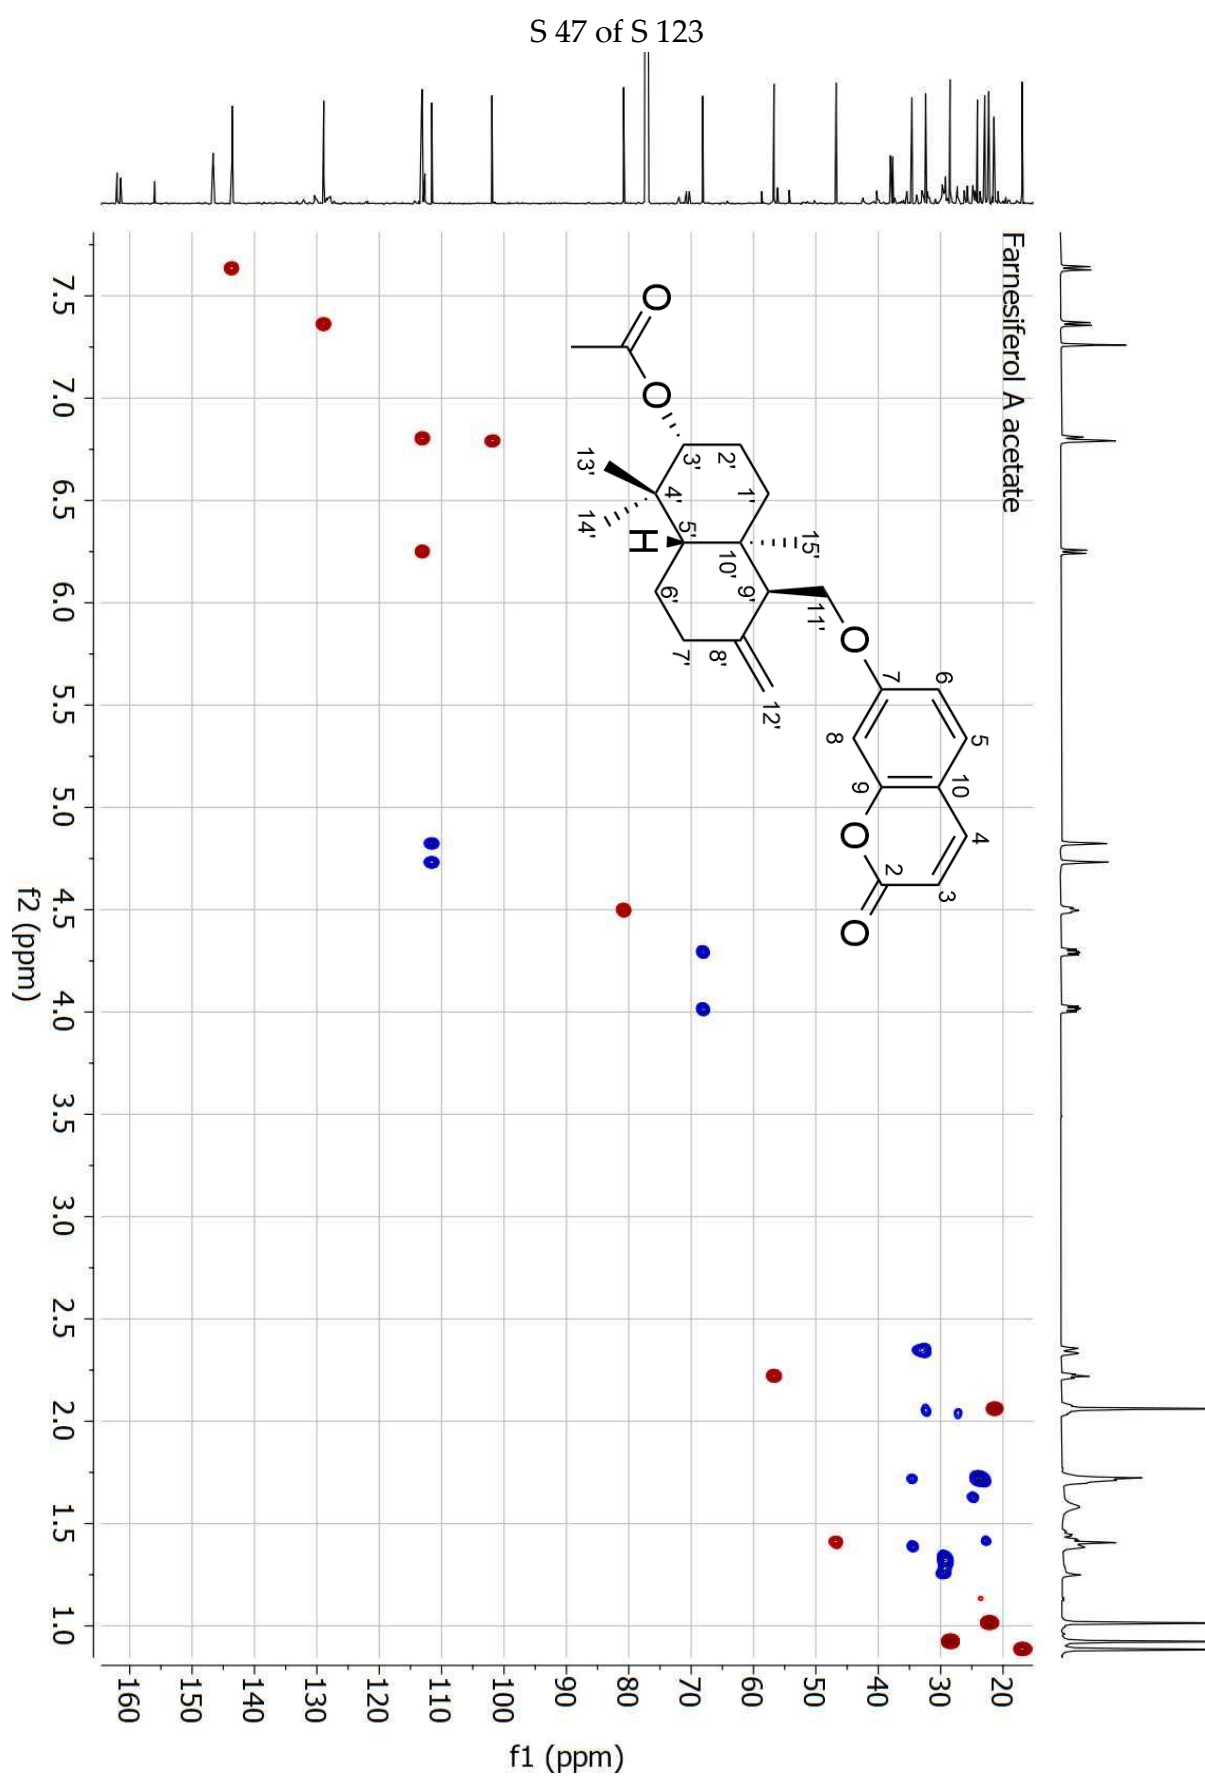

**Figure S41.** HSQC spectrum (CDCl<sub>3</sub>) of farnesiferol A acetate (7)

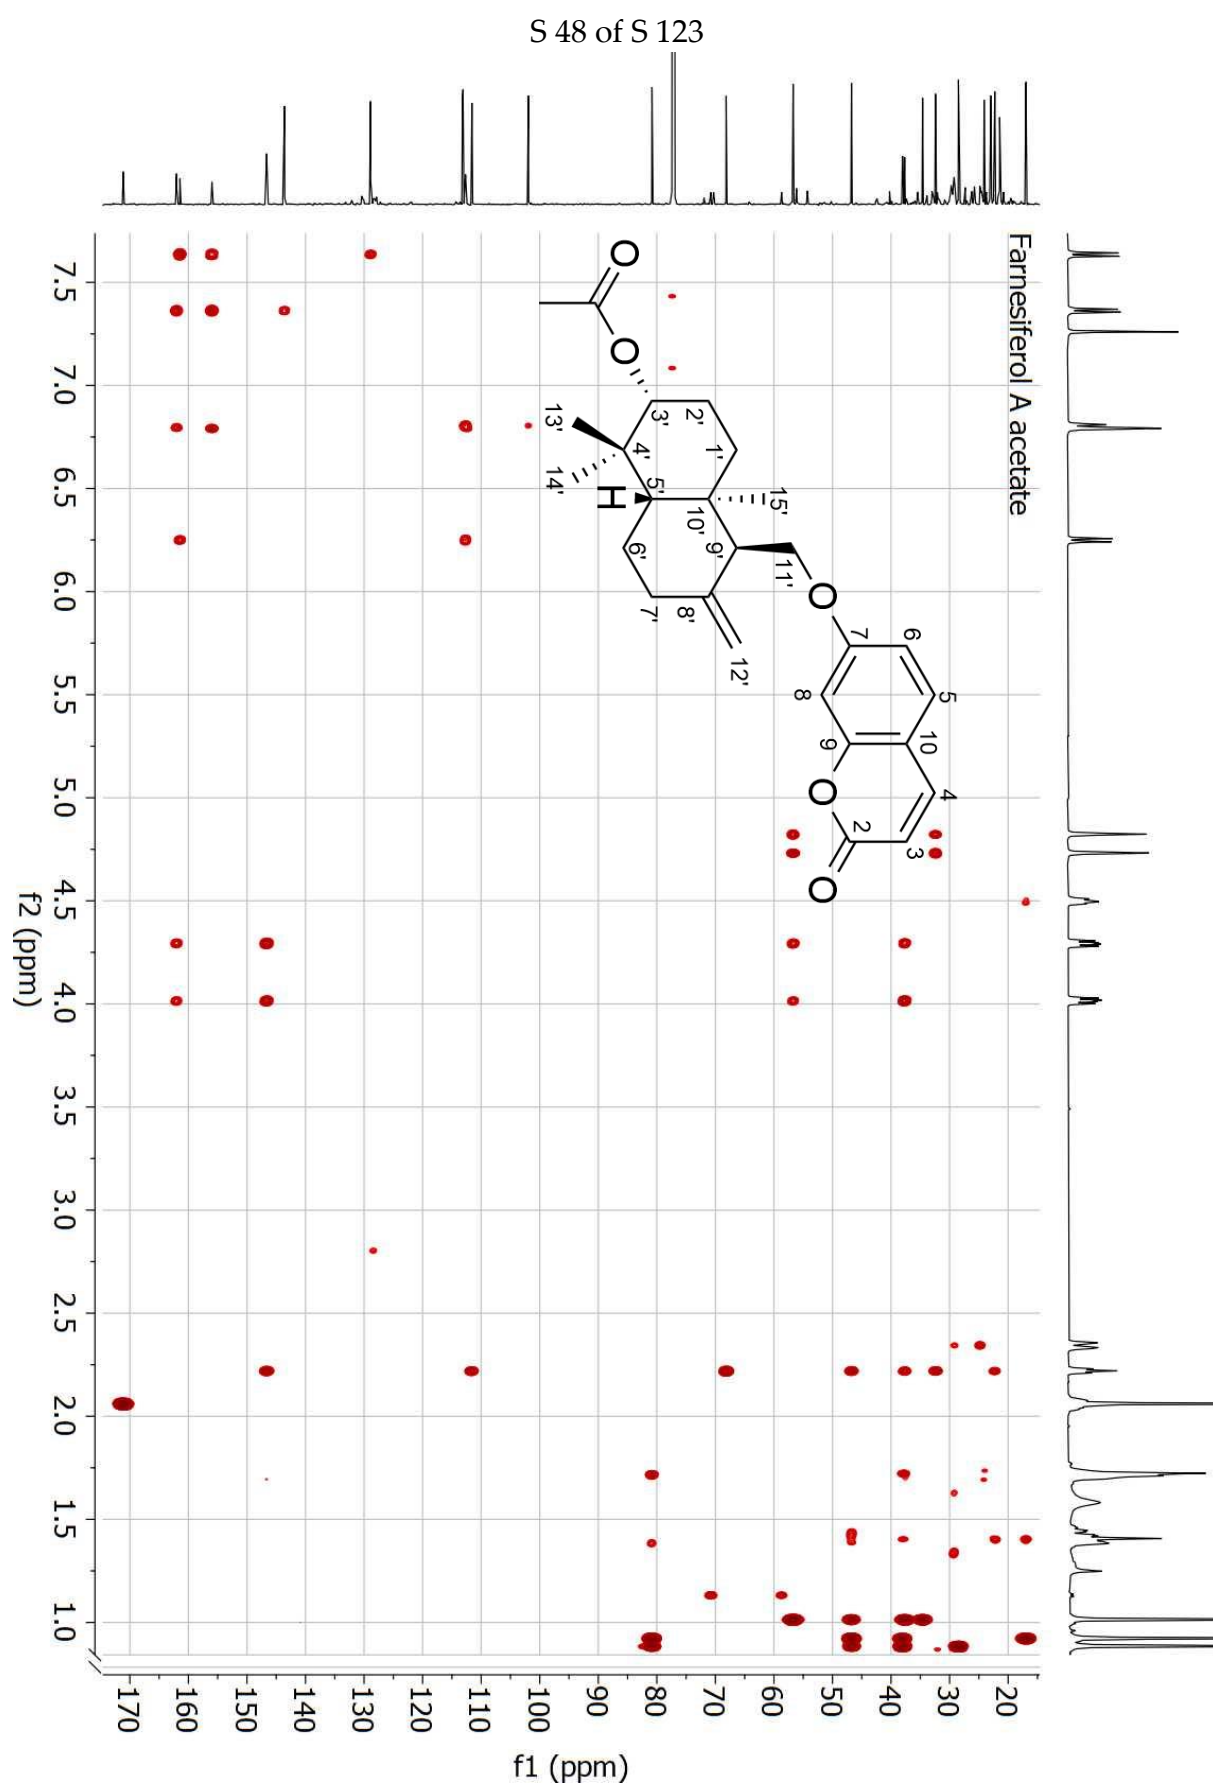

**Figure S42.** HMBC spectrum (CDCl<sub>3</sub>) of farnesiferol A acetate (7)

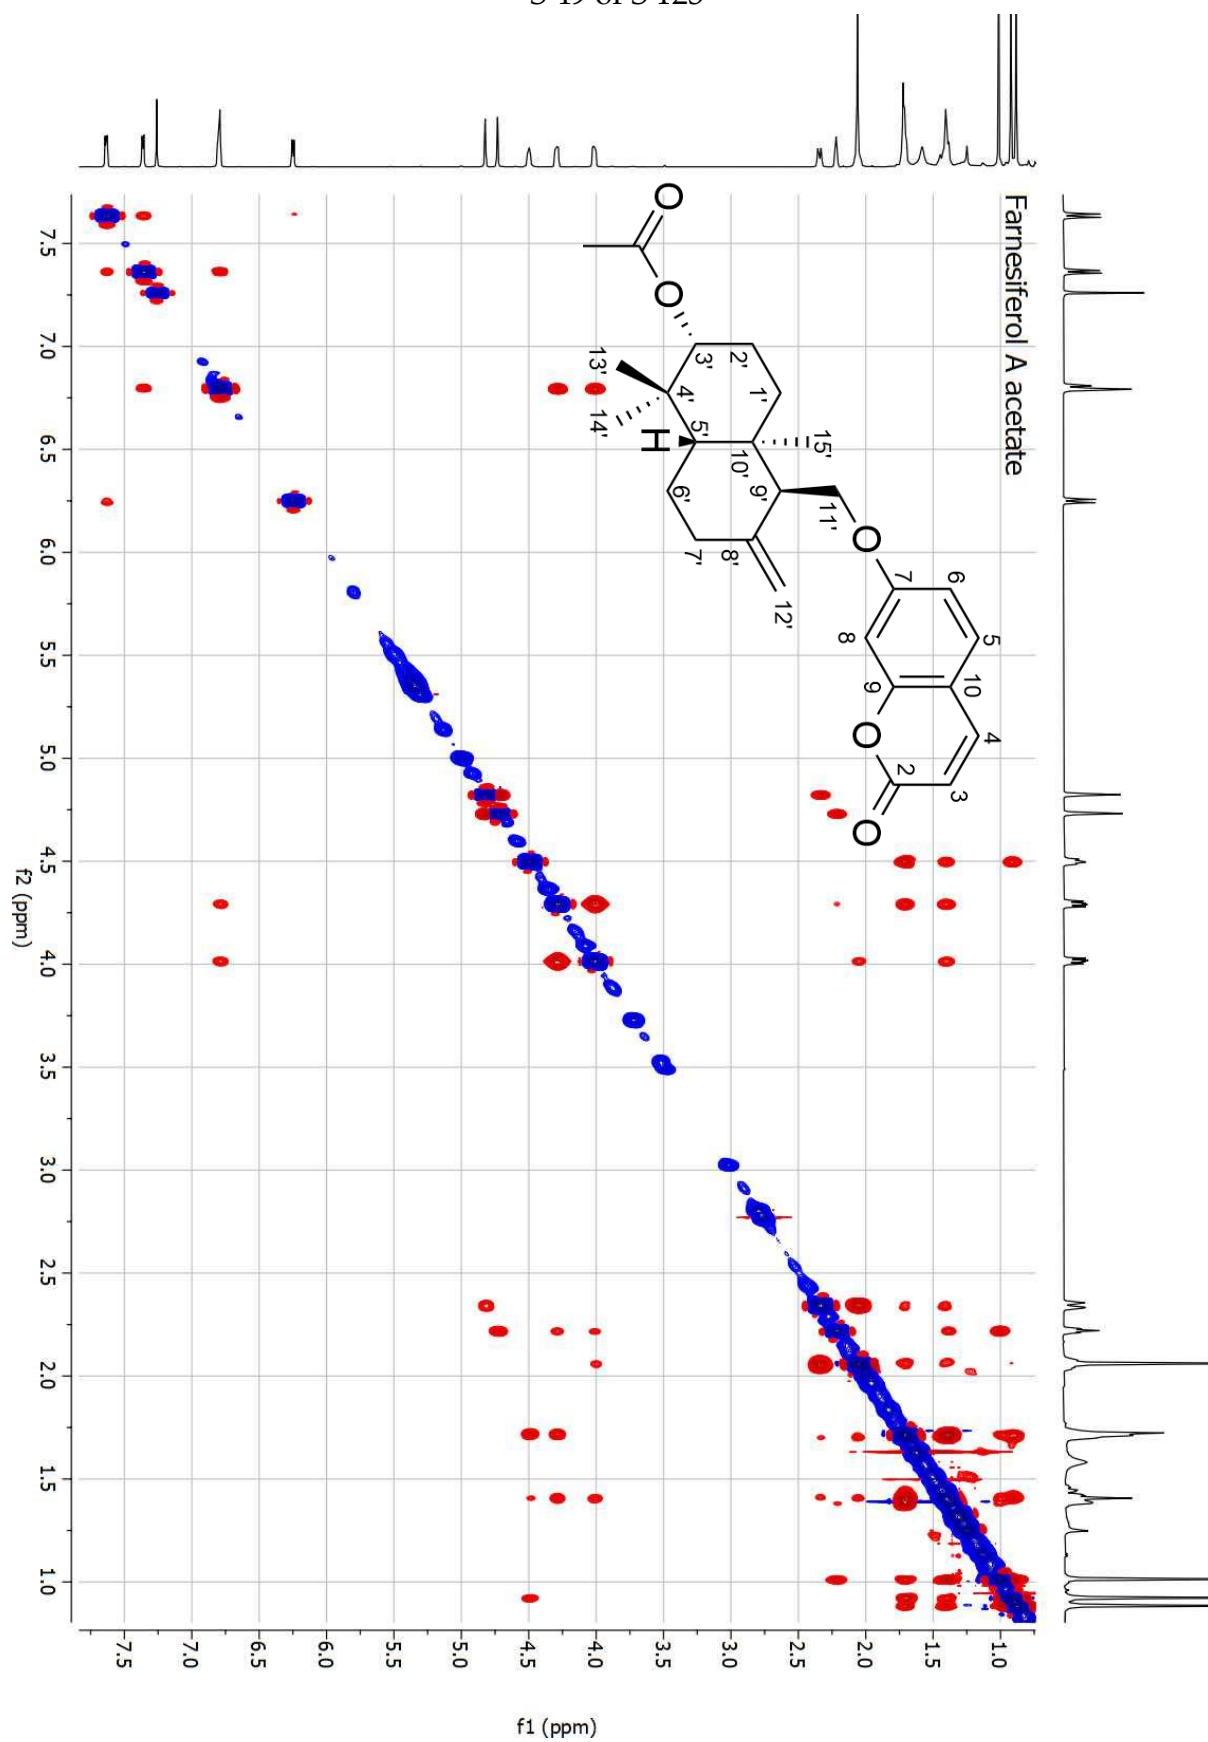

**Figure S43.** NOESY spectrum (CDCl<sub>3</sub>) of farnesiferol A acetate (7)

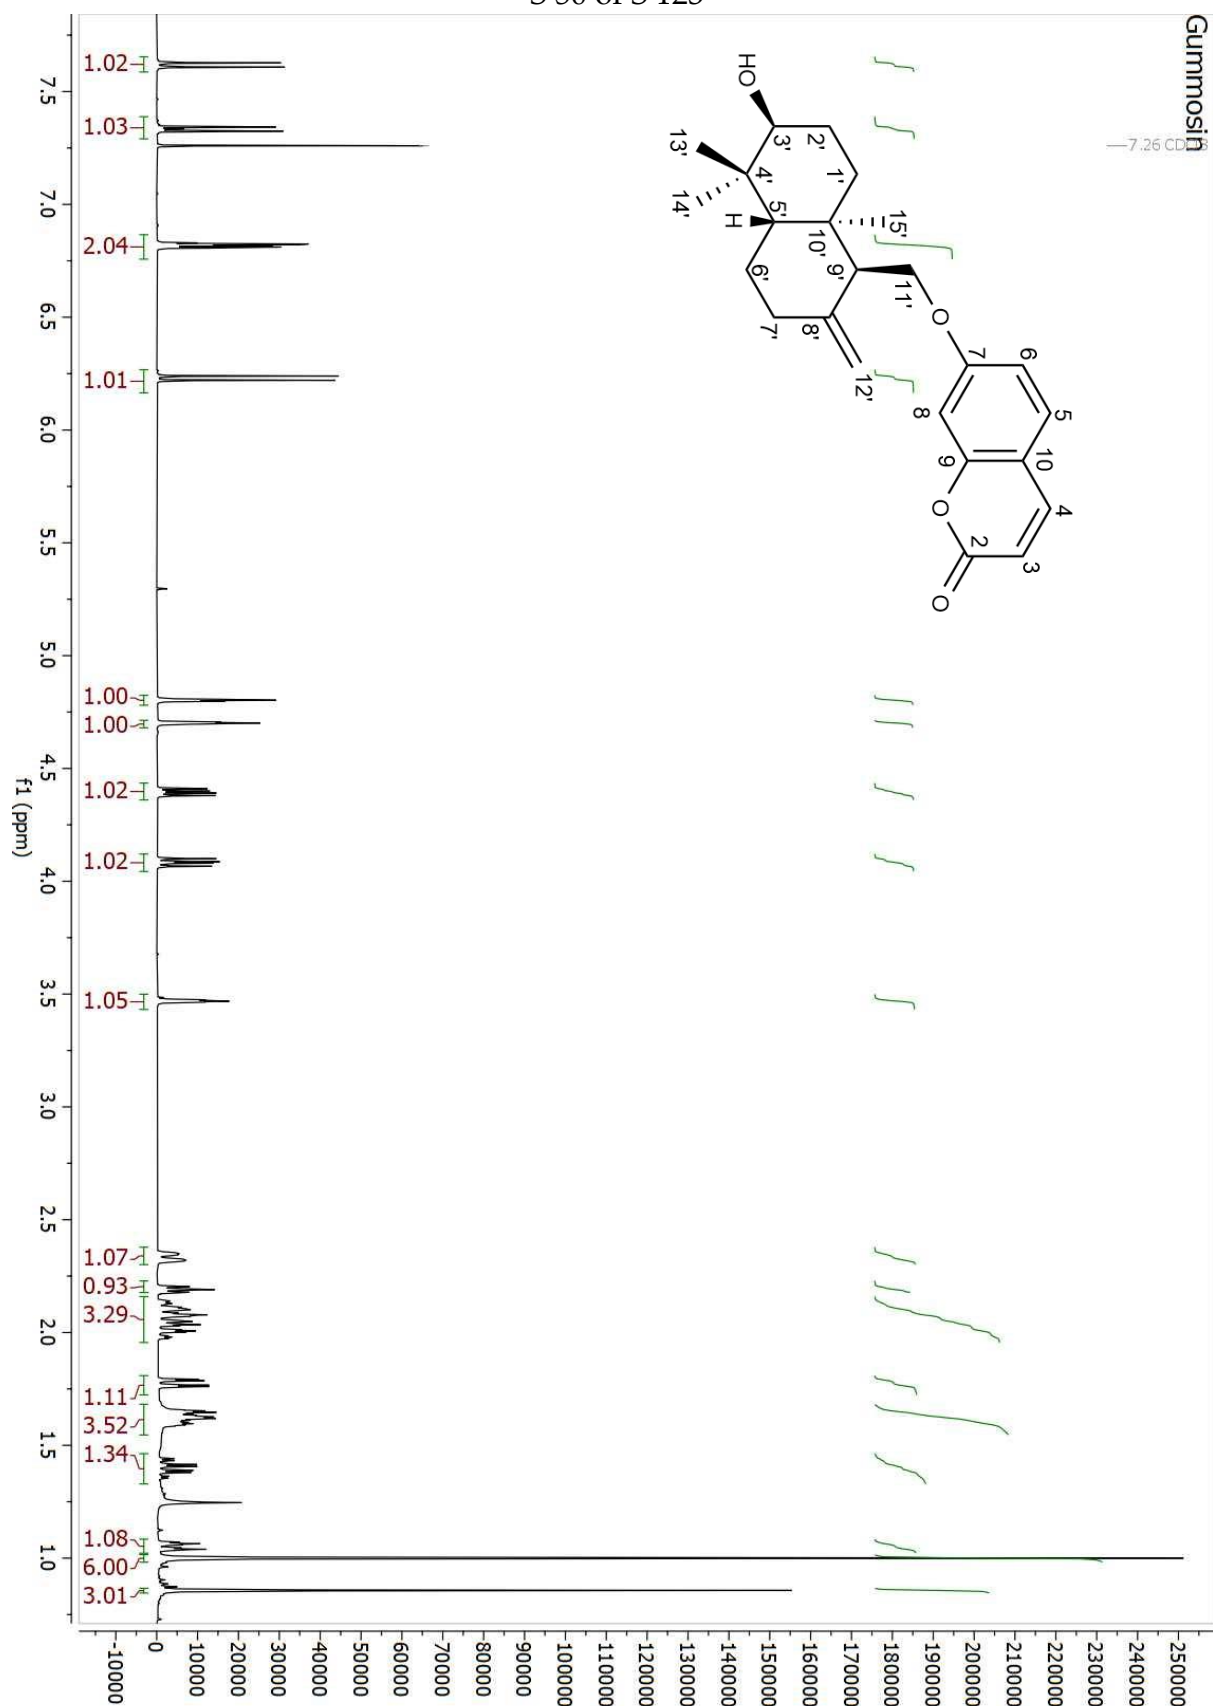

**Figure S44.** <sup>1</sup>H-NMR spectrum (500 MHz, CDCl<sub>3</sub>) of gummosin (8)

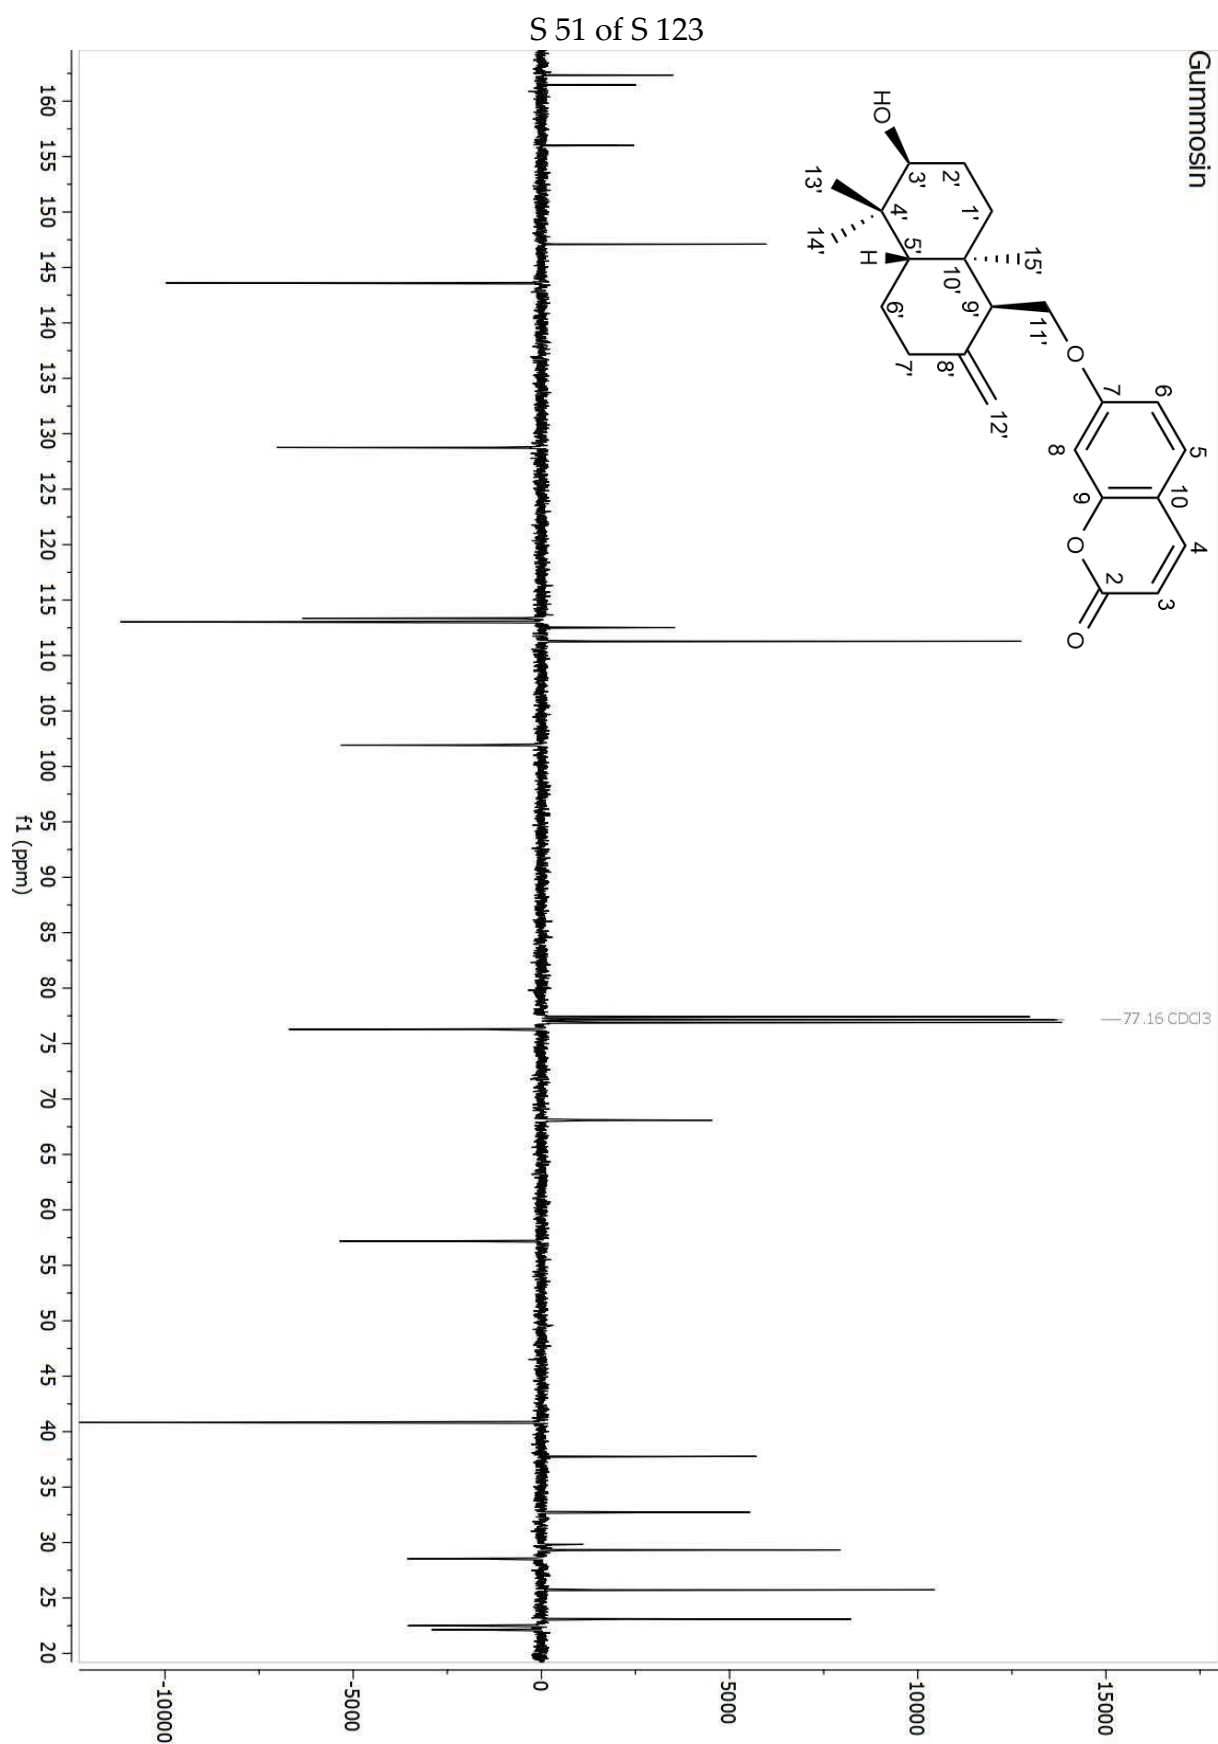

**Figure S45.**  $^{13}\text{C}$ -NMR (APT) spectrum (125 MHz,  $\text{CDCl}_3$ ) of gummosin (8)

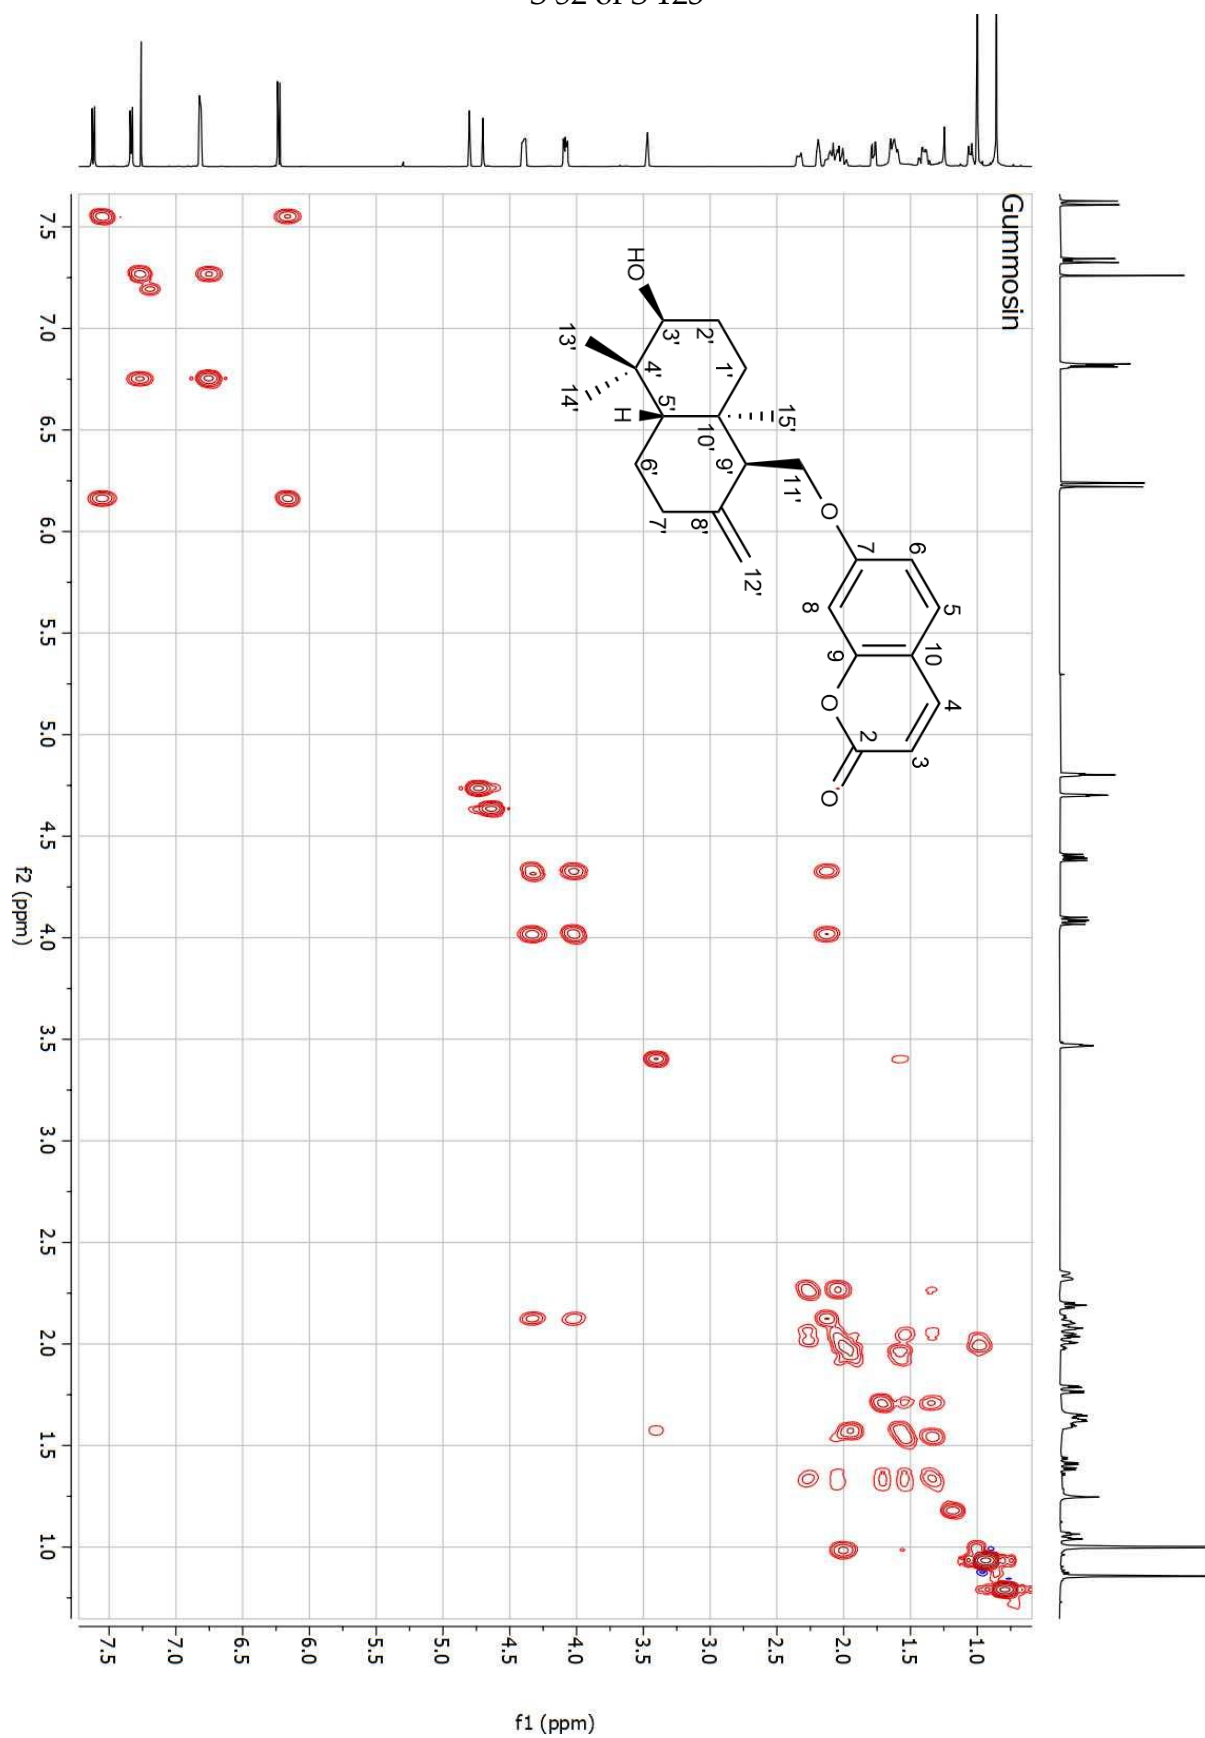

**Figure S46.**  $^1\text{H}$ - $^1\text{H}$  COSY spectrum ( $\text{CDCl}_3$ ) of gummosin (8)



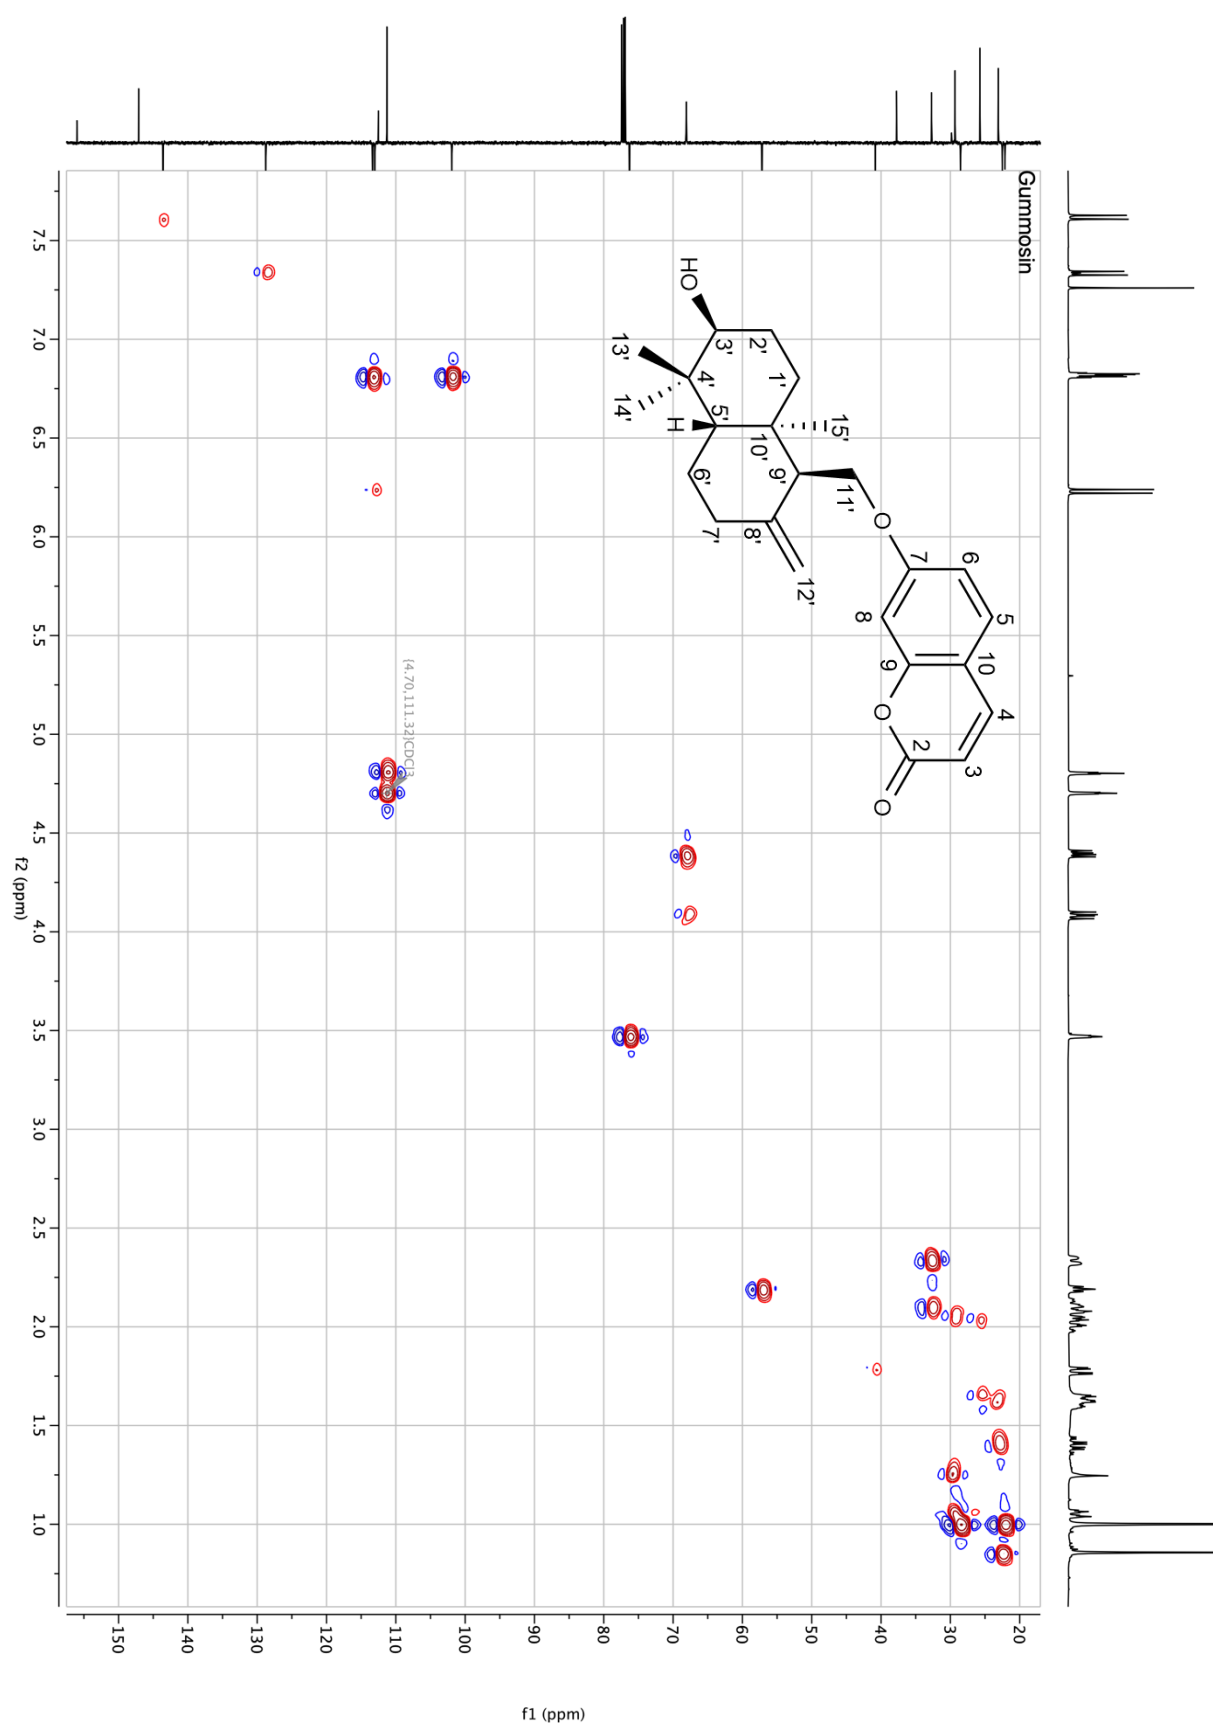

Figure S47. HSQC spectrum (CDCl<sub>3</sub>) of gummosin (8)

S 54 of S 123

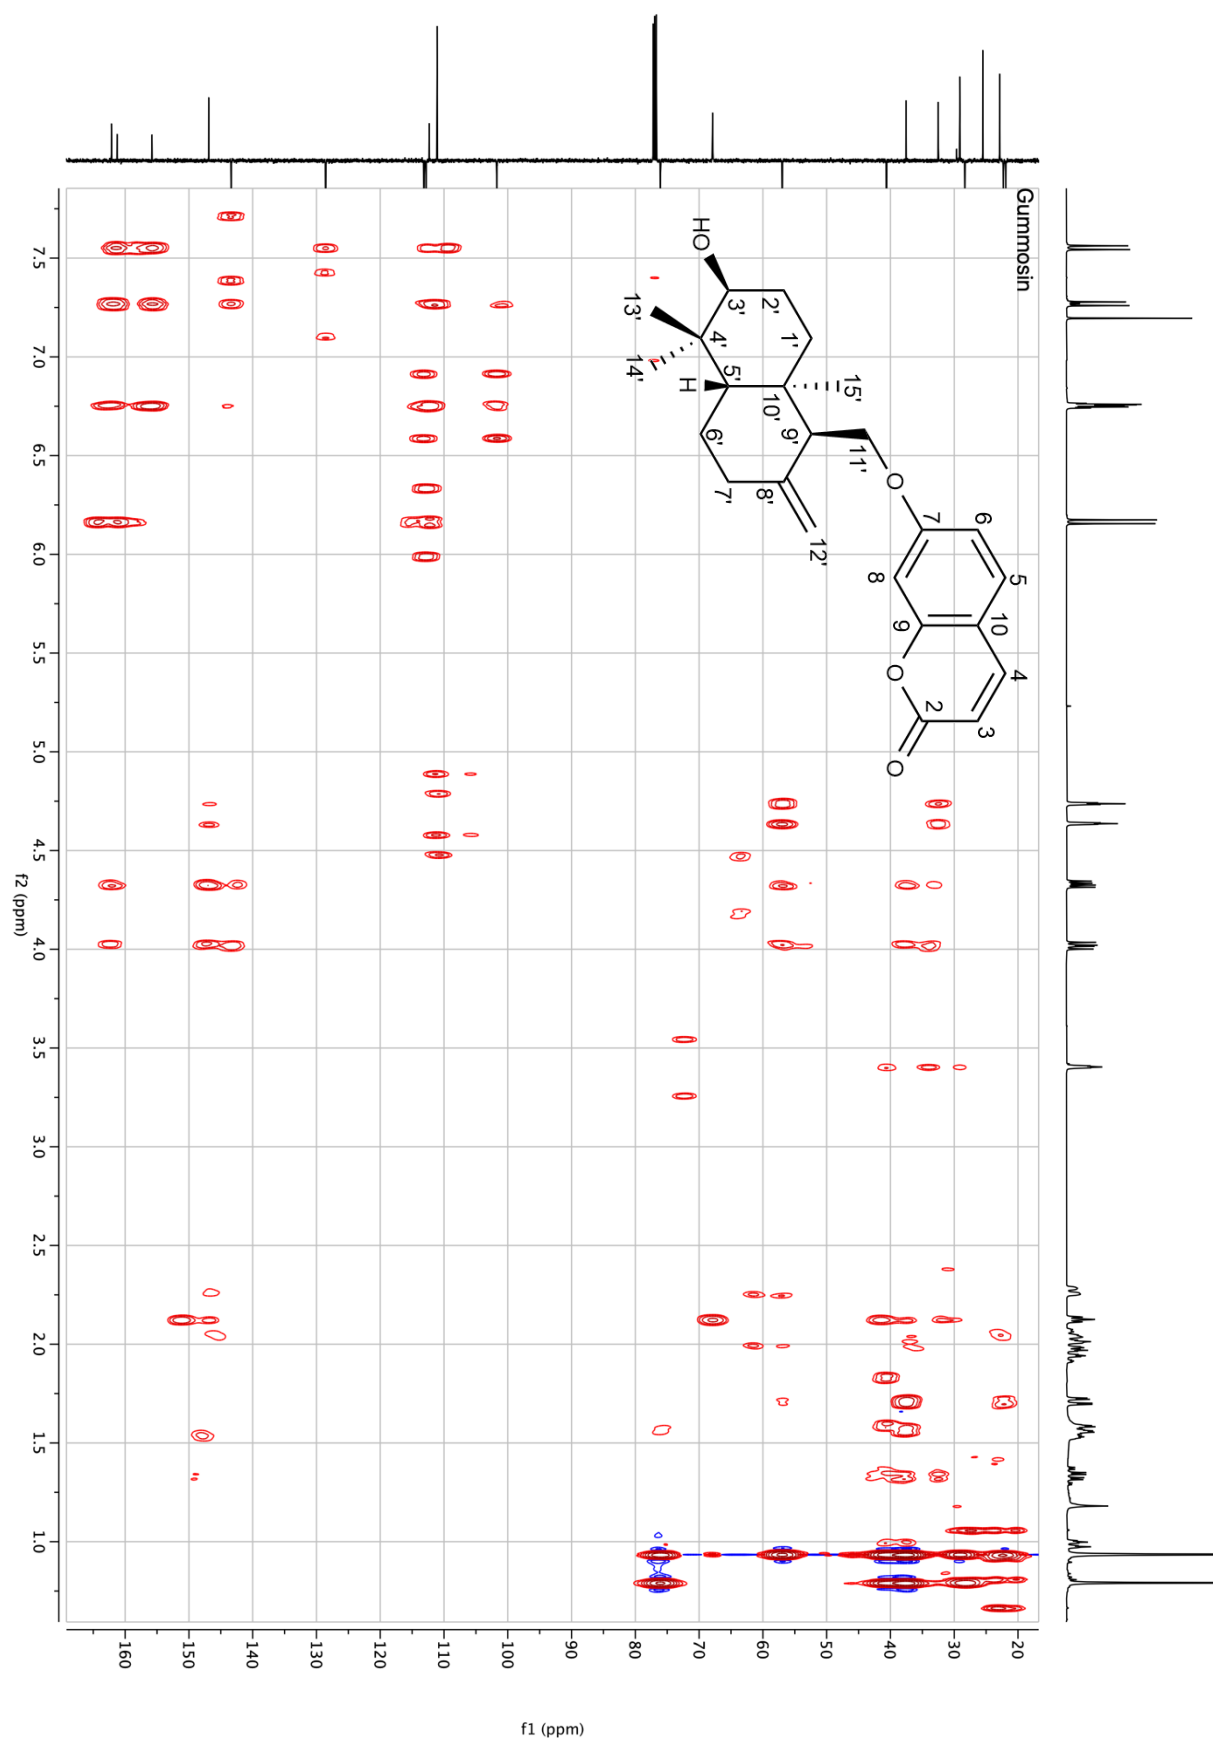**Figure S48.** HMBC spectrum ( $\text{CDCl}_3$ ) of gummosin (8)

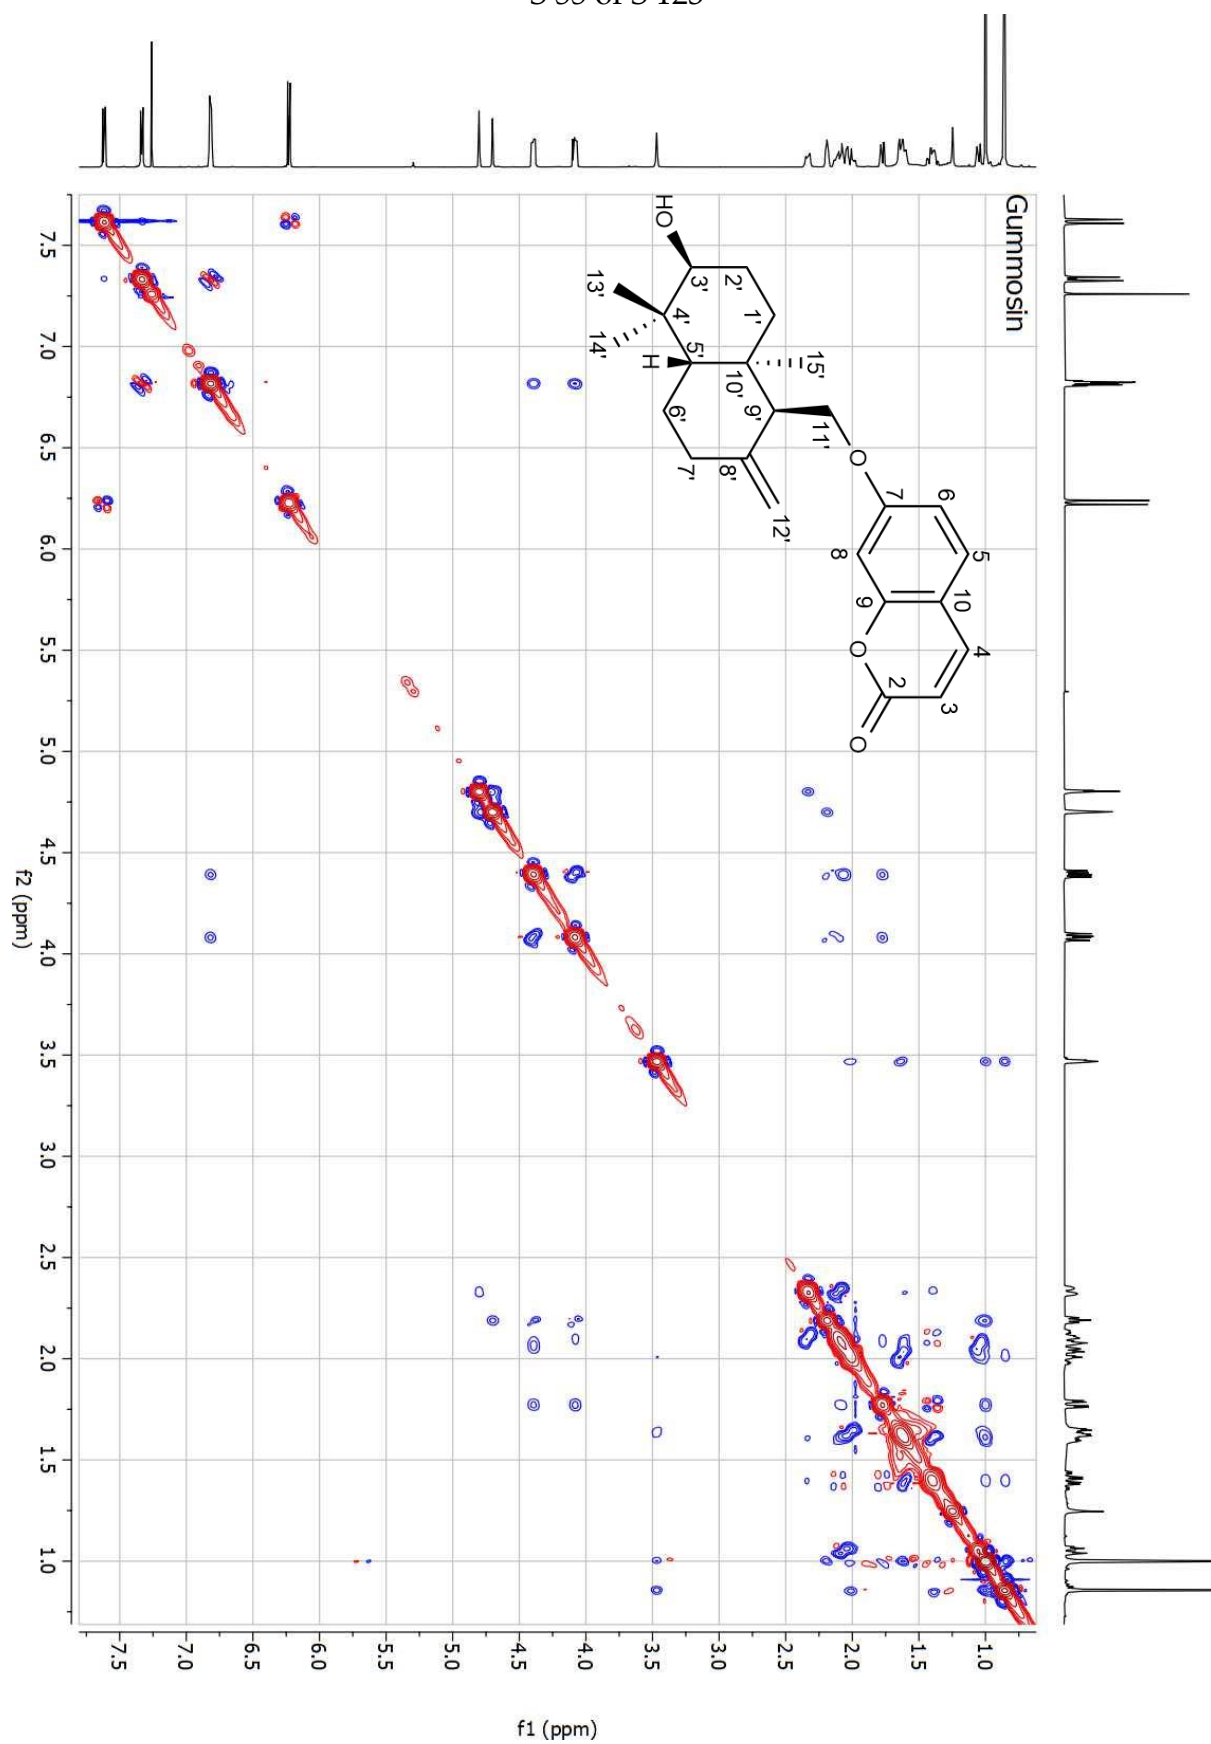**Figure S49.** NOESY spectrum ( $\text{CDCl}_3$ ) of gummosin (8)

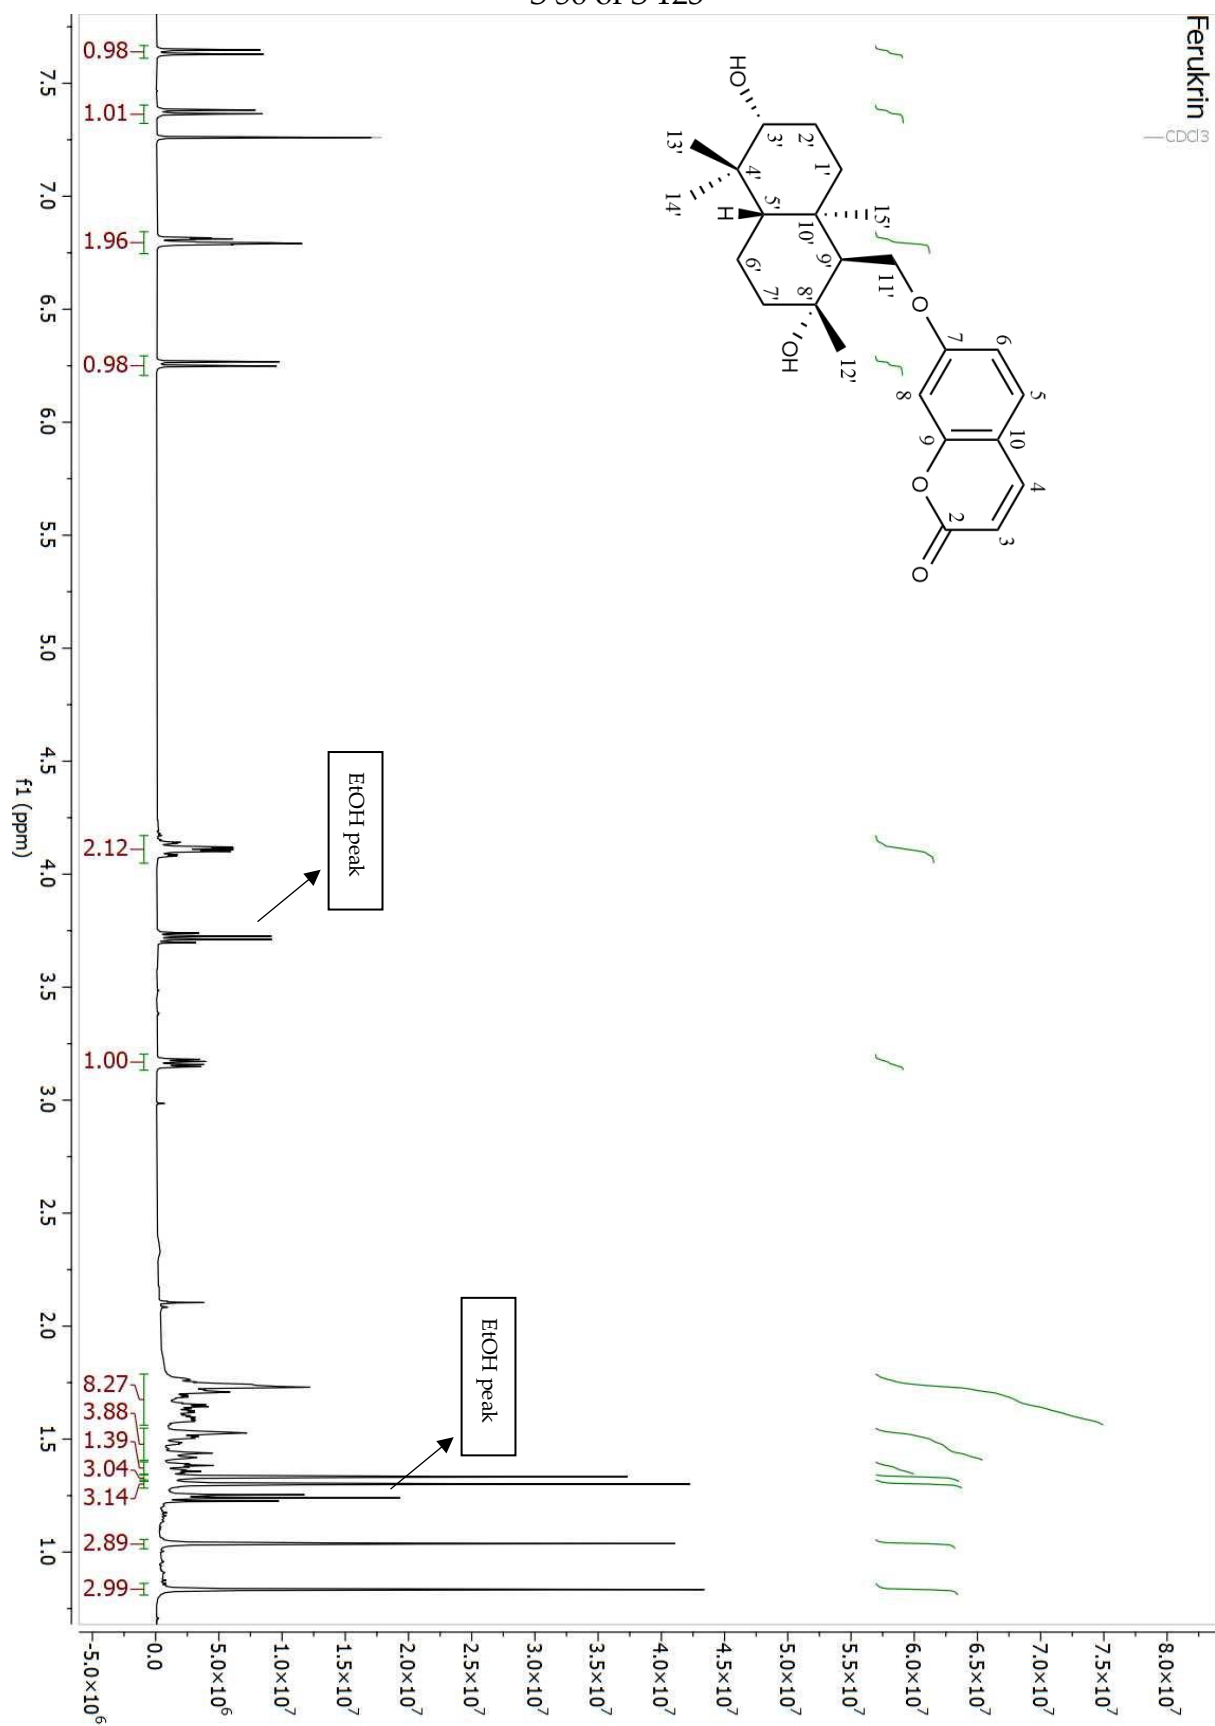**Figure S50.**  $^1\text{H}$ -NMR spectrum (500 MHz,  $\text{CDCl}_3$ ) of ferukrin (9)

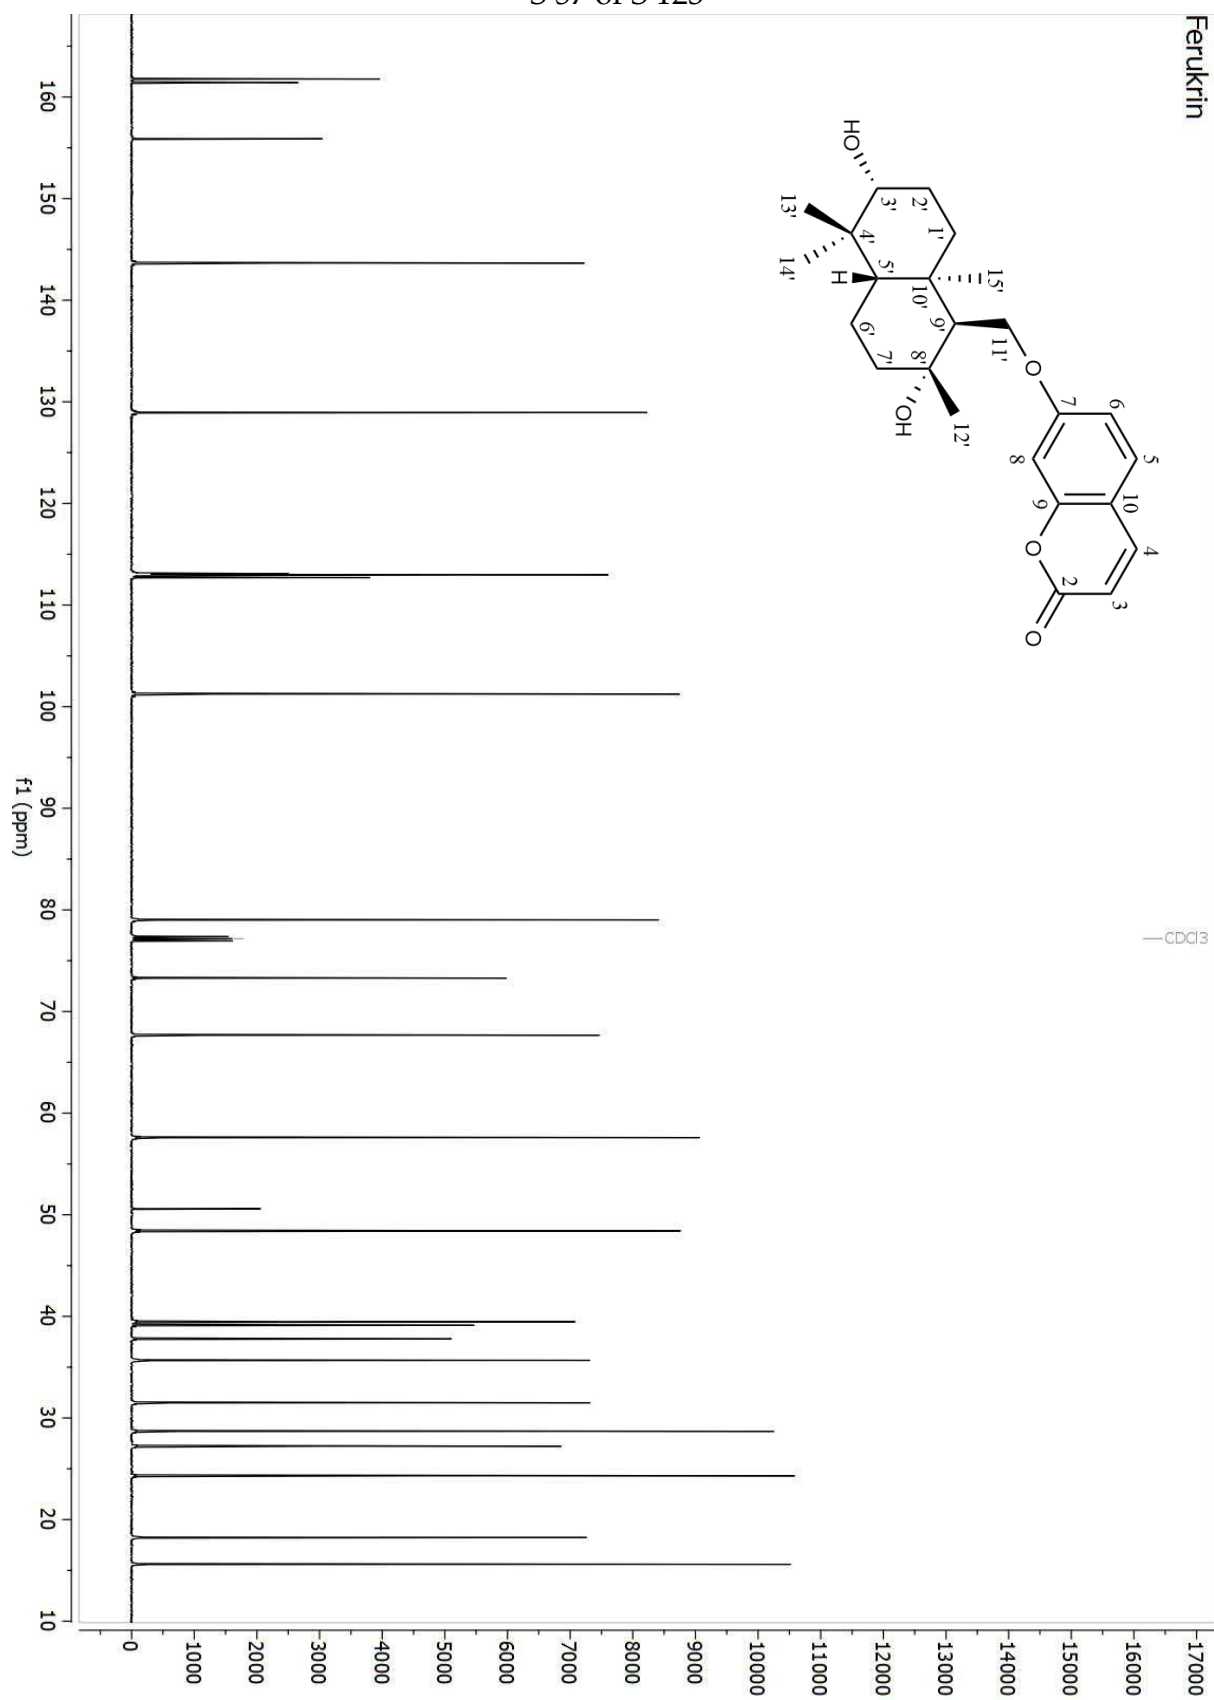

**Figure S51.**  $^{13}\text{C}$ -NMR spectrum (125 MHz,  $\text{CDCl}_3$ ) of ferukrin (9)

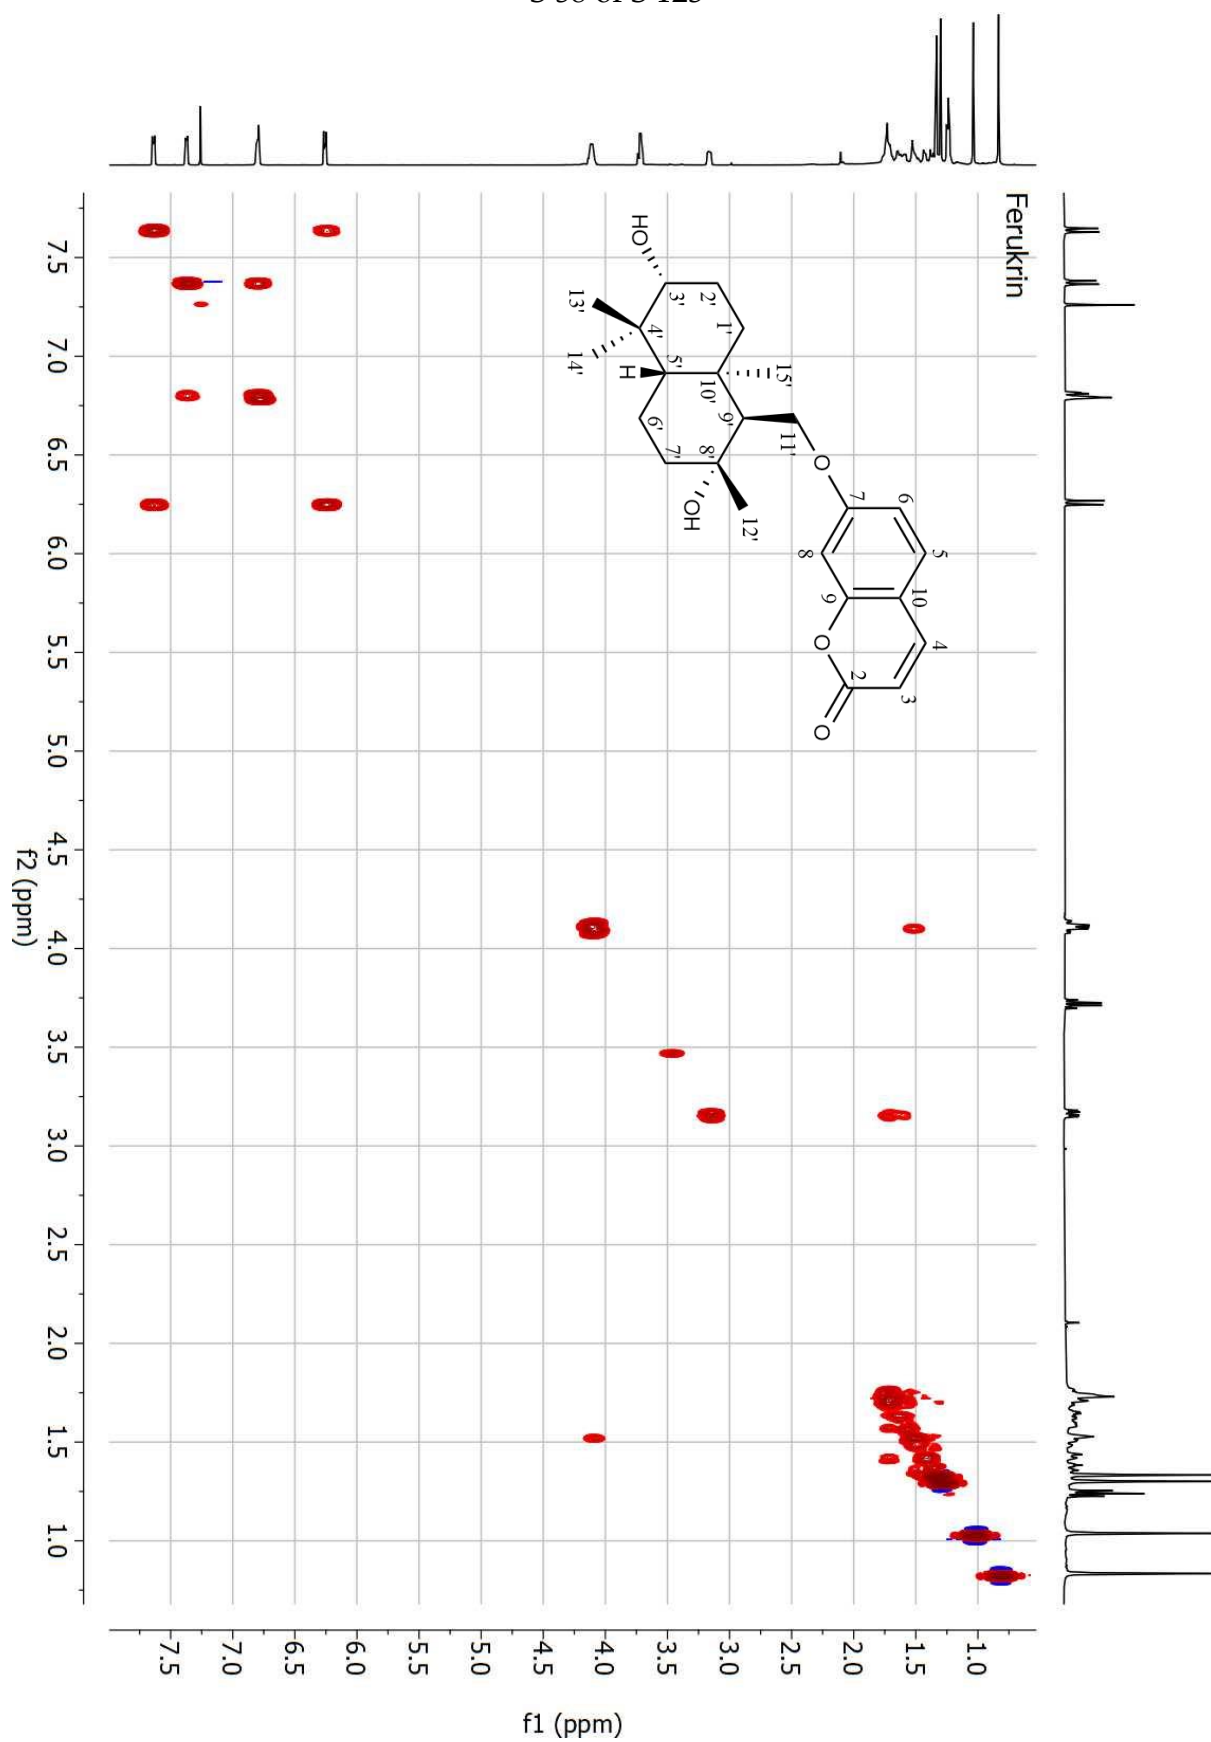

**Figure S52.** <sup>1</sup>H-<sup>1</sup>H COSY spectrum (CDCl<sub>3</sub>) of ferukrin (9)

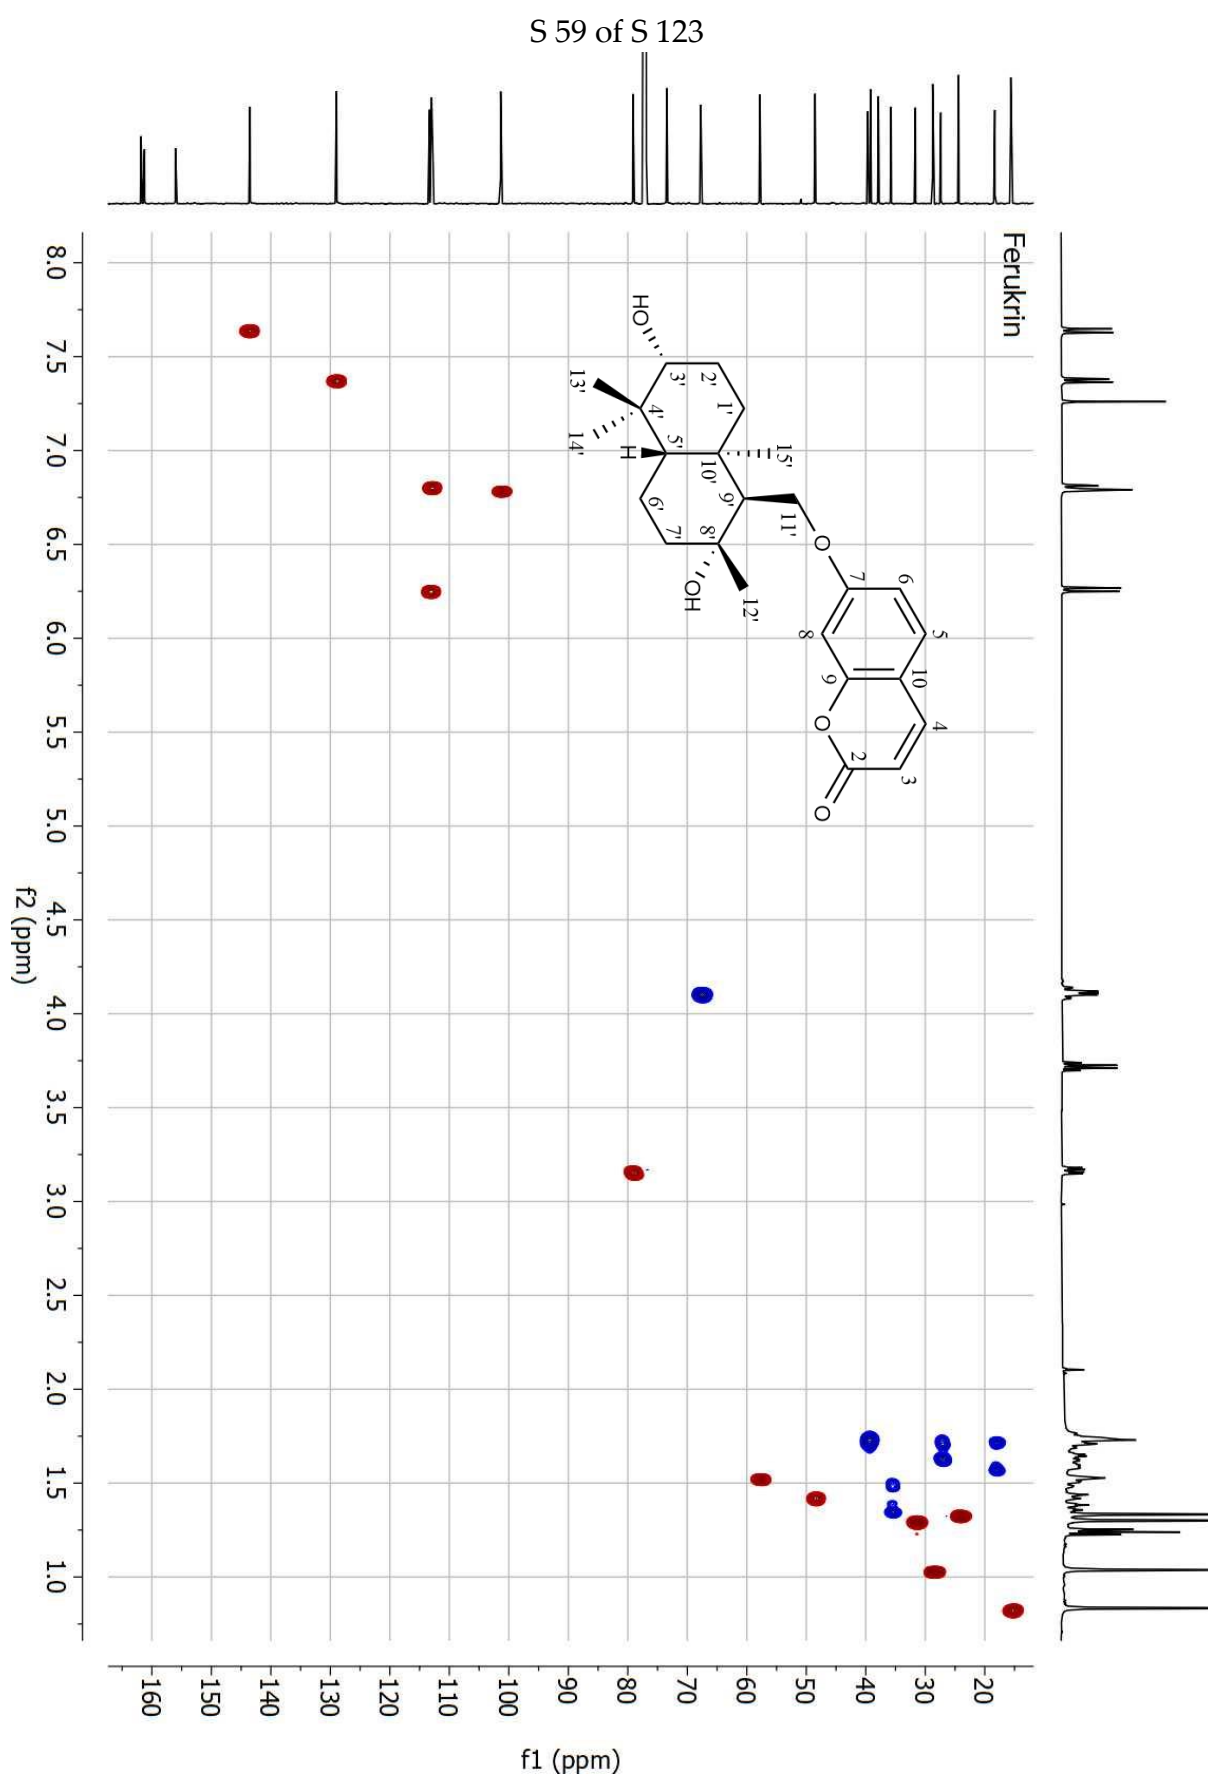

**Figure S53.** HSQC spectrum (CDCl<sub>3</sub>) of ferukrin (9)

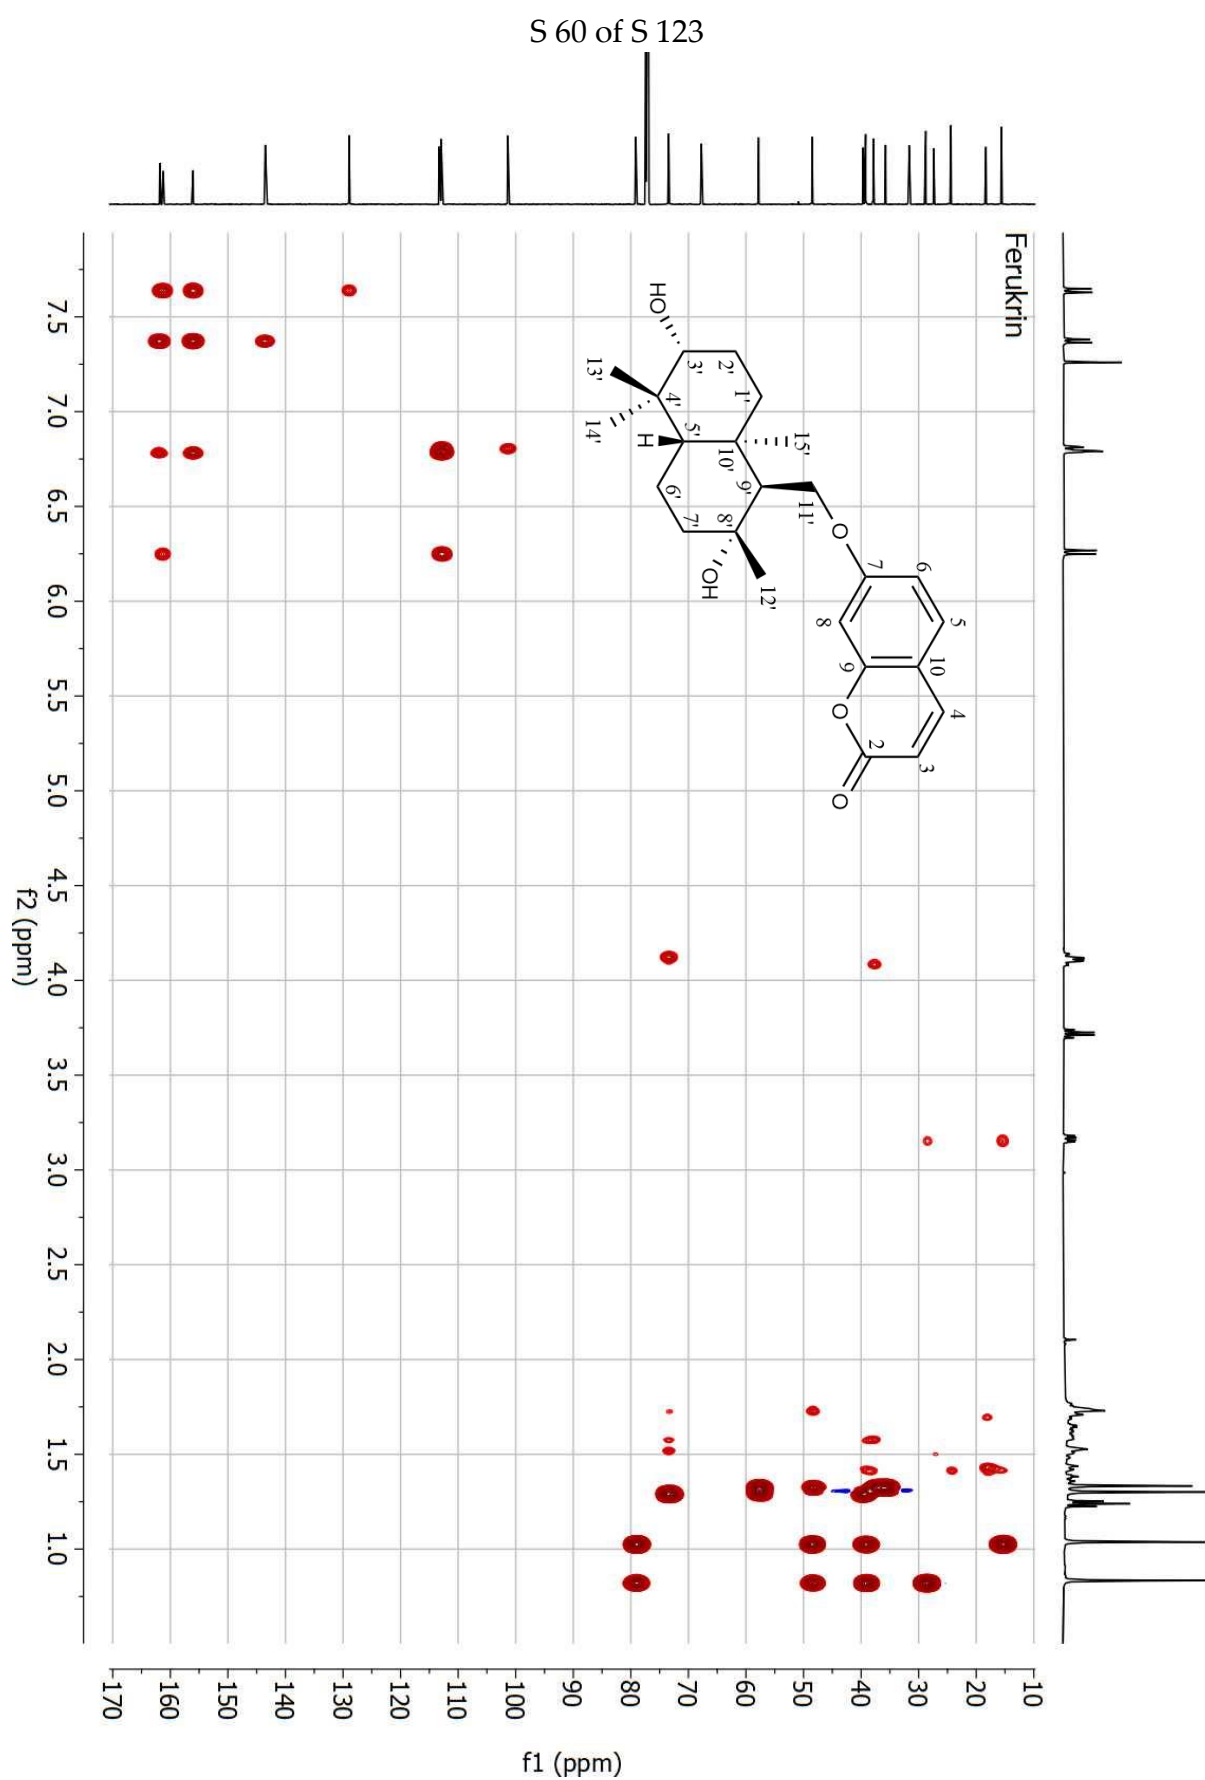

**Figure S54.** HMBC spectrum (CDCl<sub>3</sub>) of ferukrin (9)



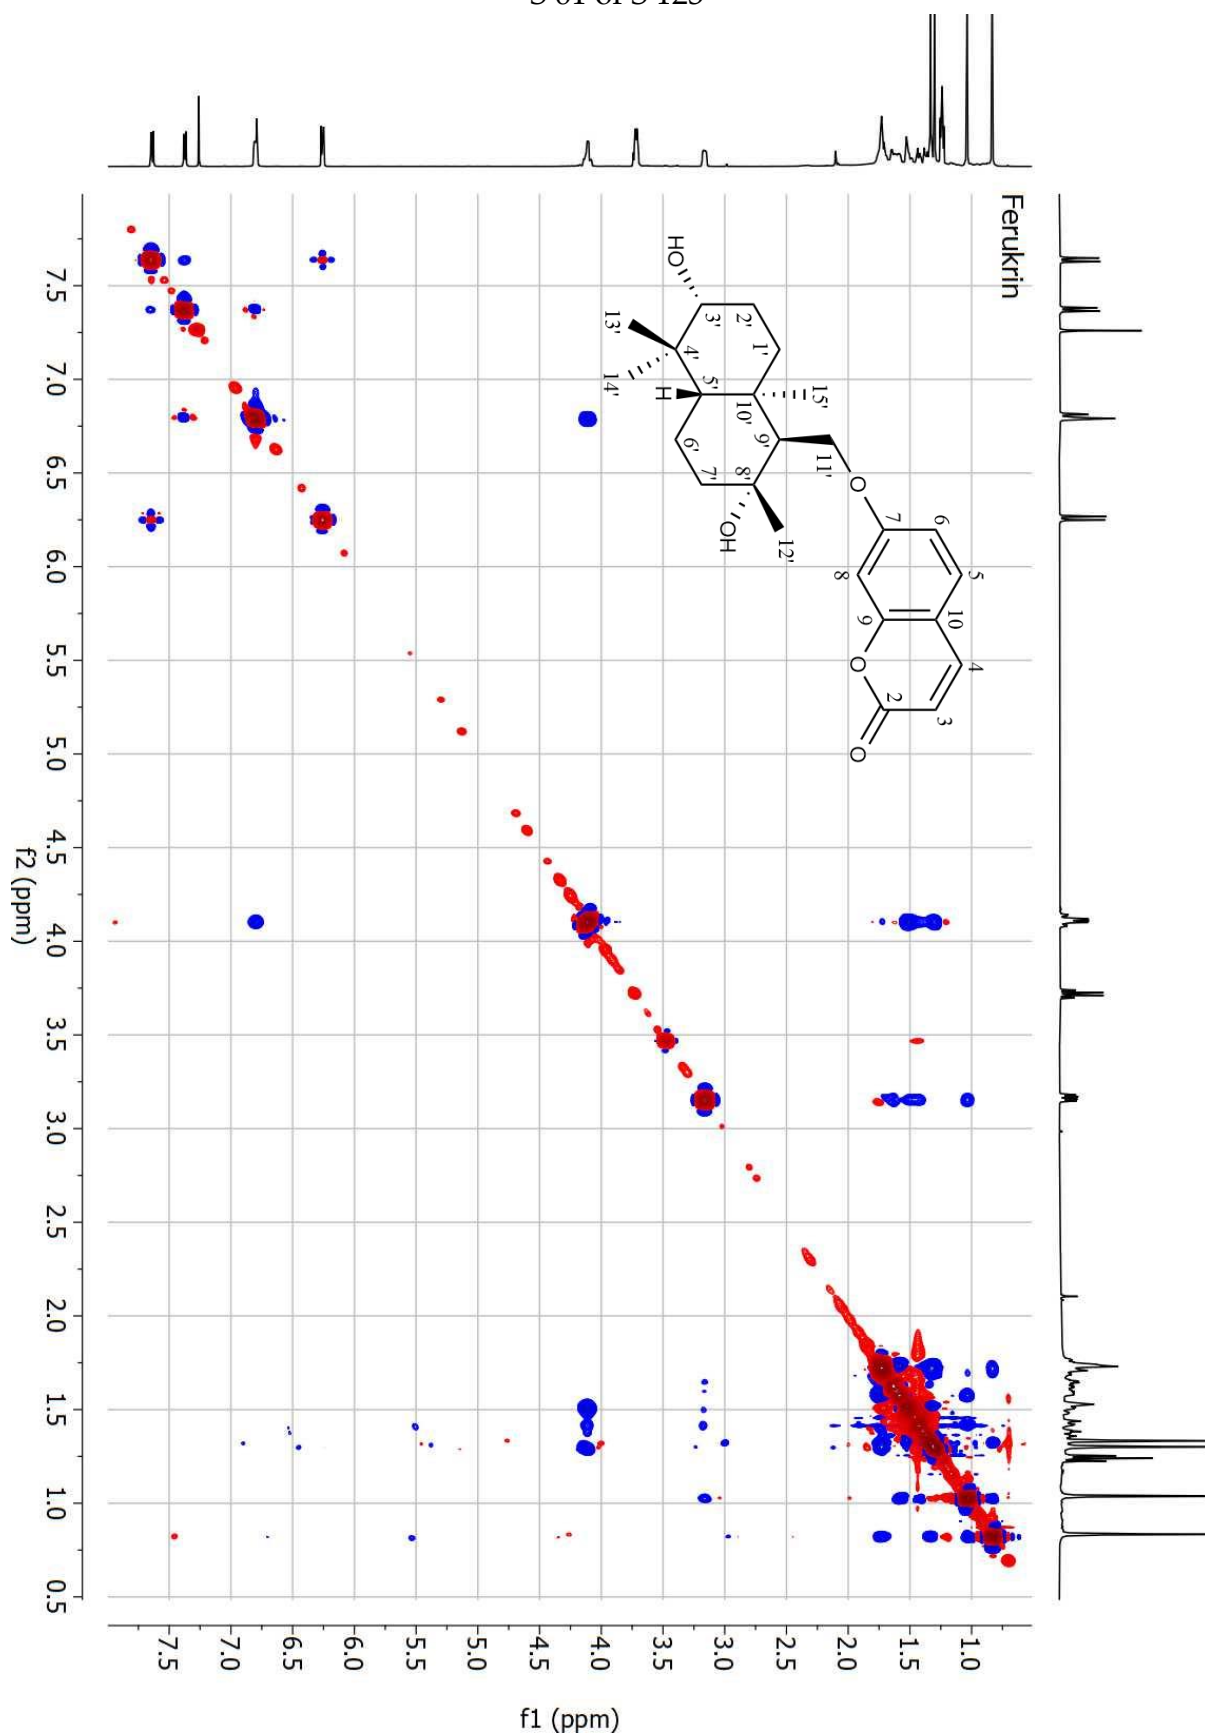

Figure S55. NOESY spectrum (CDCl<sub>3</sub>) of ferukrin (9)

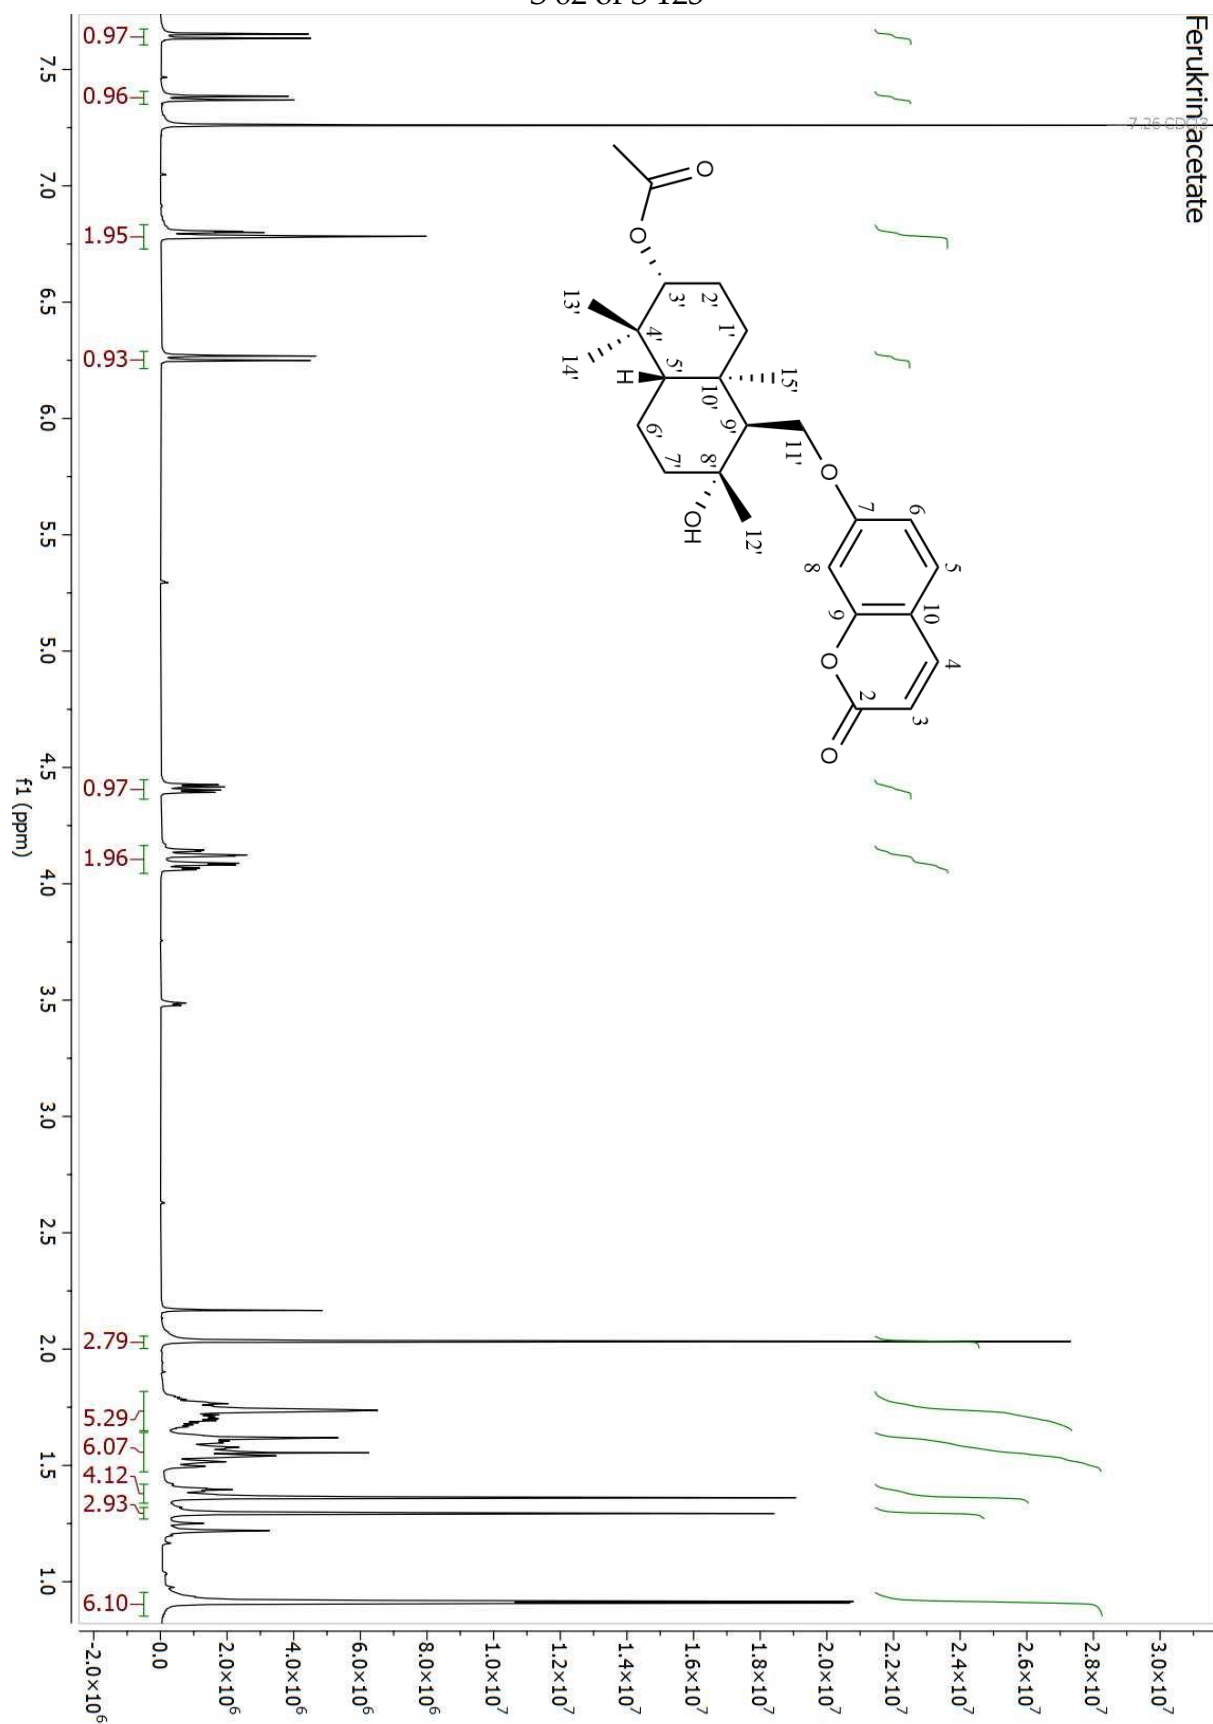

**Figure S56.** <sup>1</sup>H-NMR spectrum (500 MHz, CDCl<sub>3</sub>) of ferukrin acetate (10)

## Ferukrin acetate

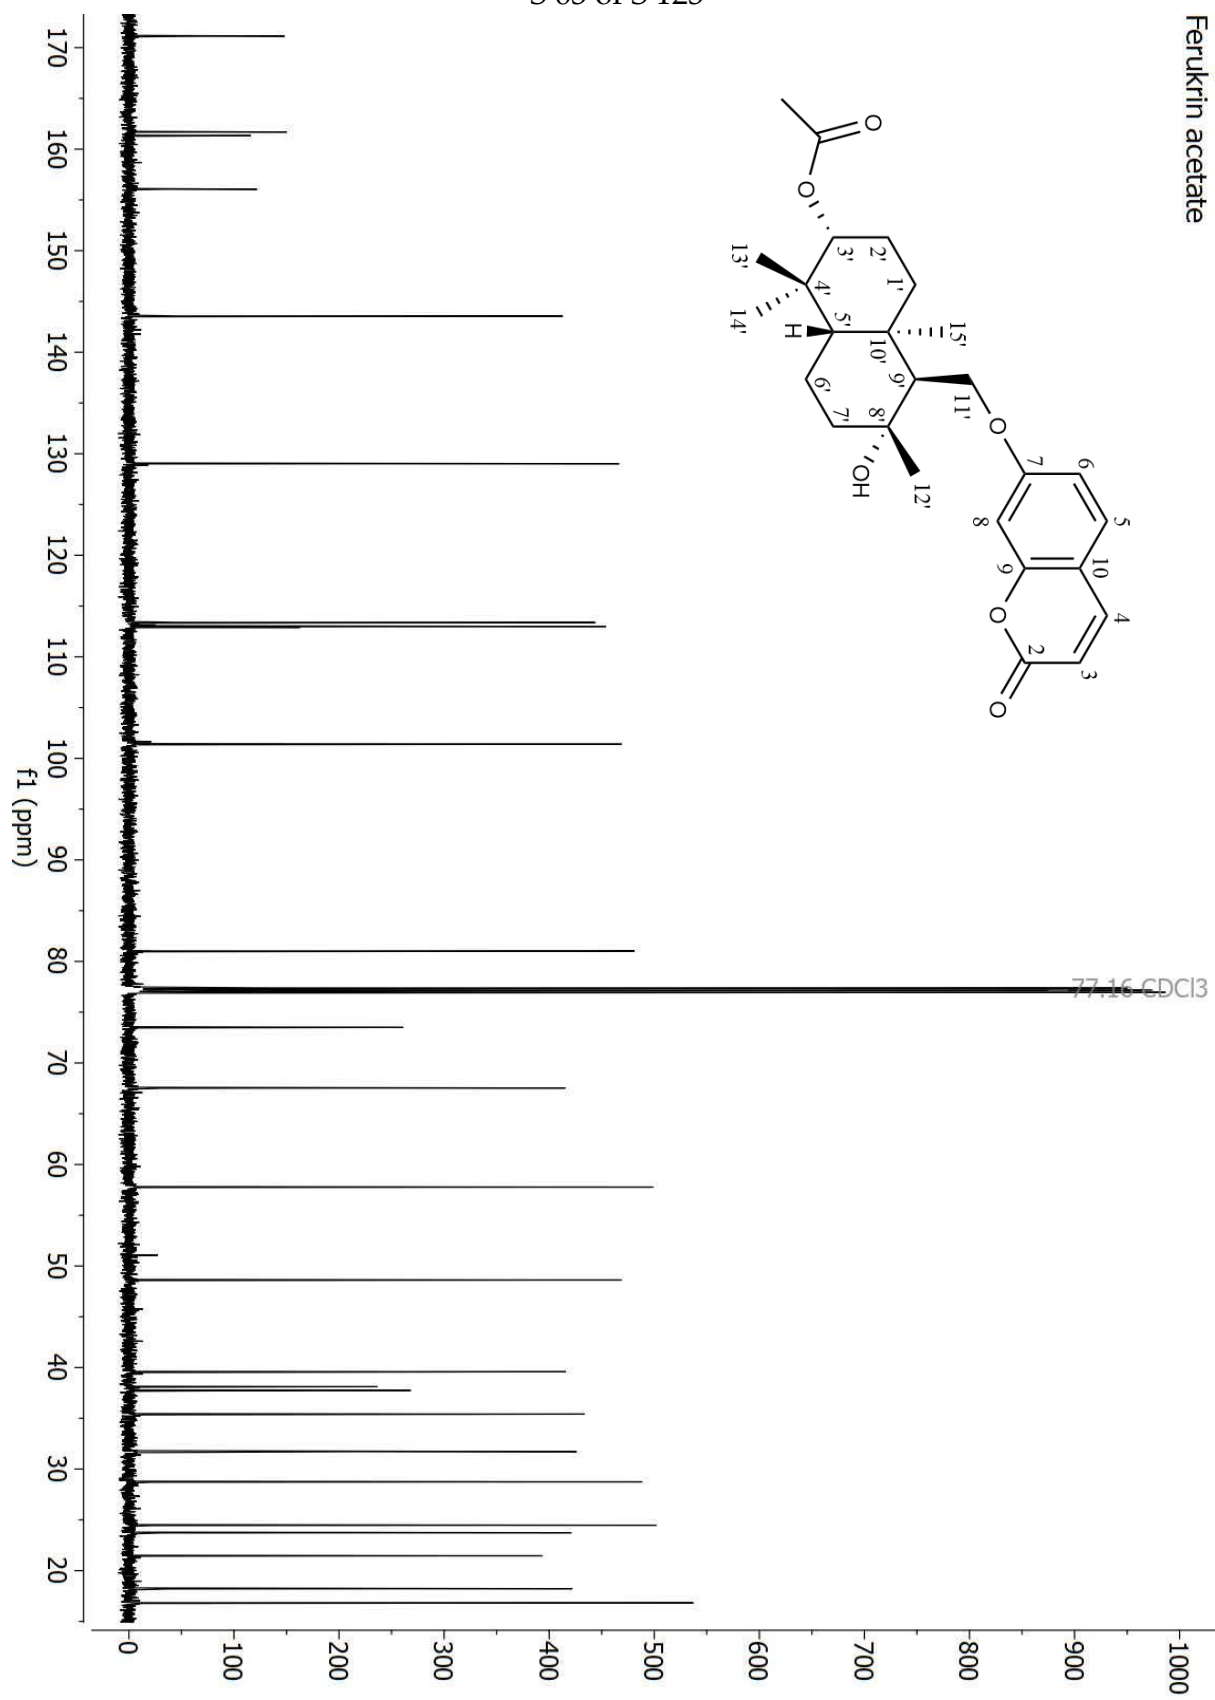

Figure S57.  $^{13}\text{C}$ -NMR spectrum (125 MHz,  $\text{CDCl}_3$ ) of ferukrin acetate (10)

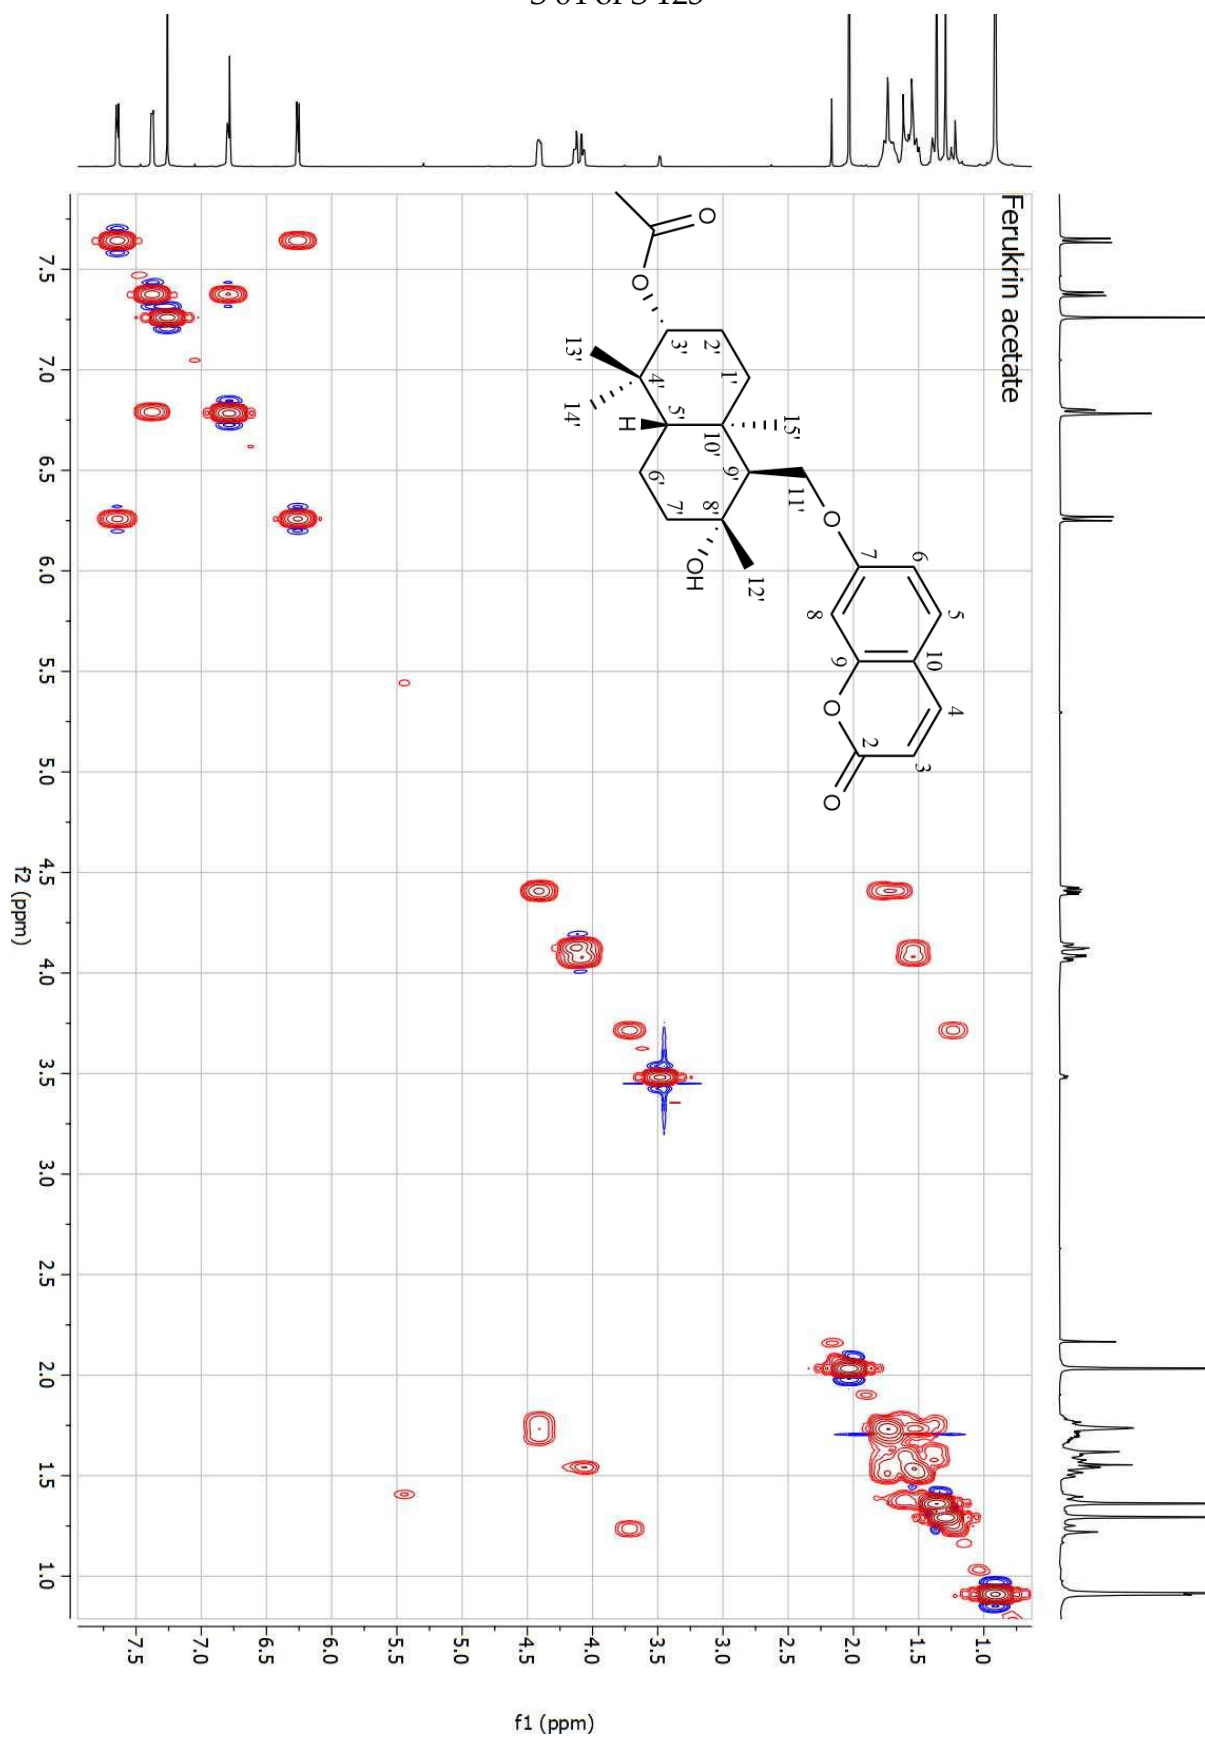

**Figure S58.**  $^1\text{H}$ - $^1\text{H}$  COSY spectrum ( $\text{CDCl}_3$ ) of ferukrin acetate (10)

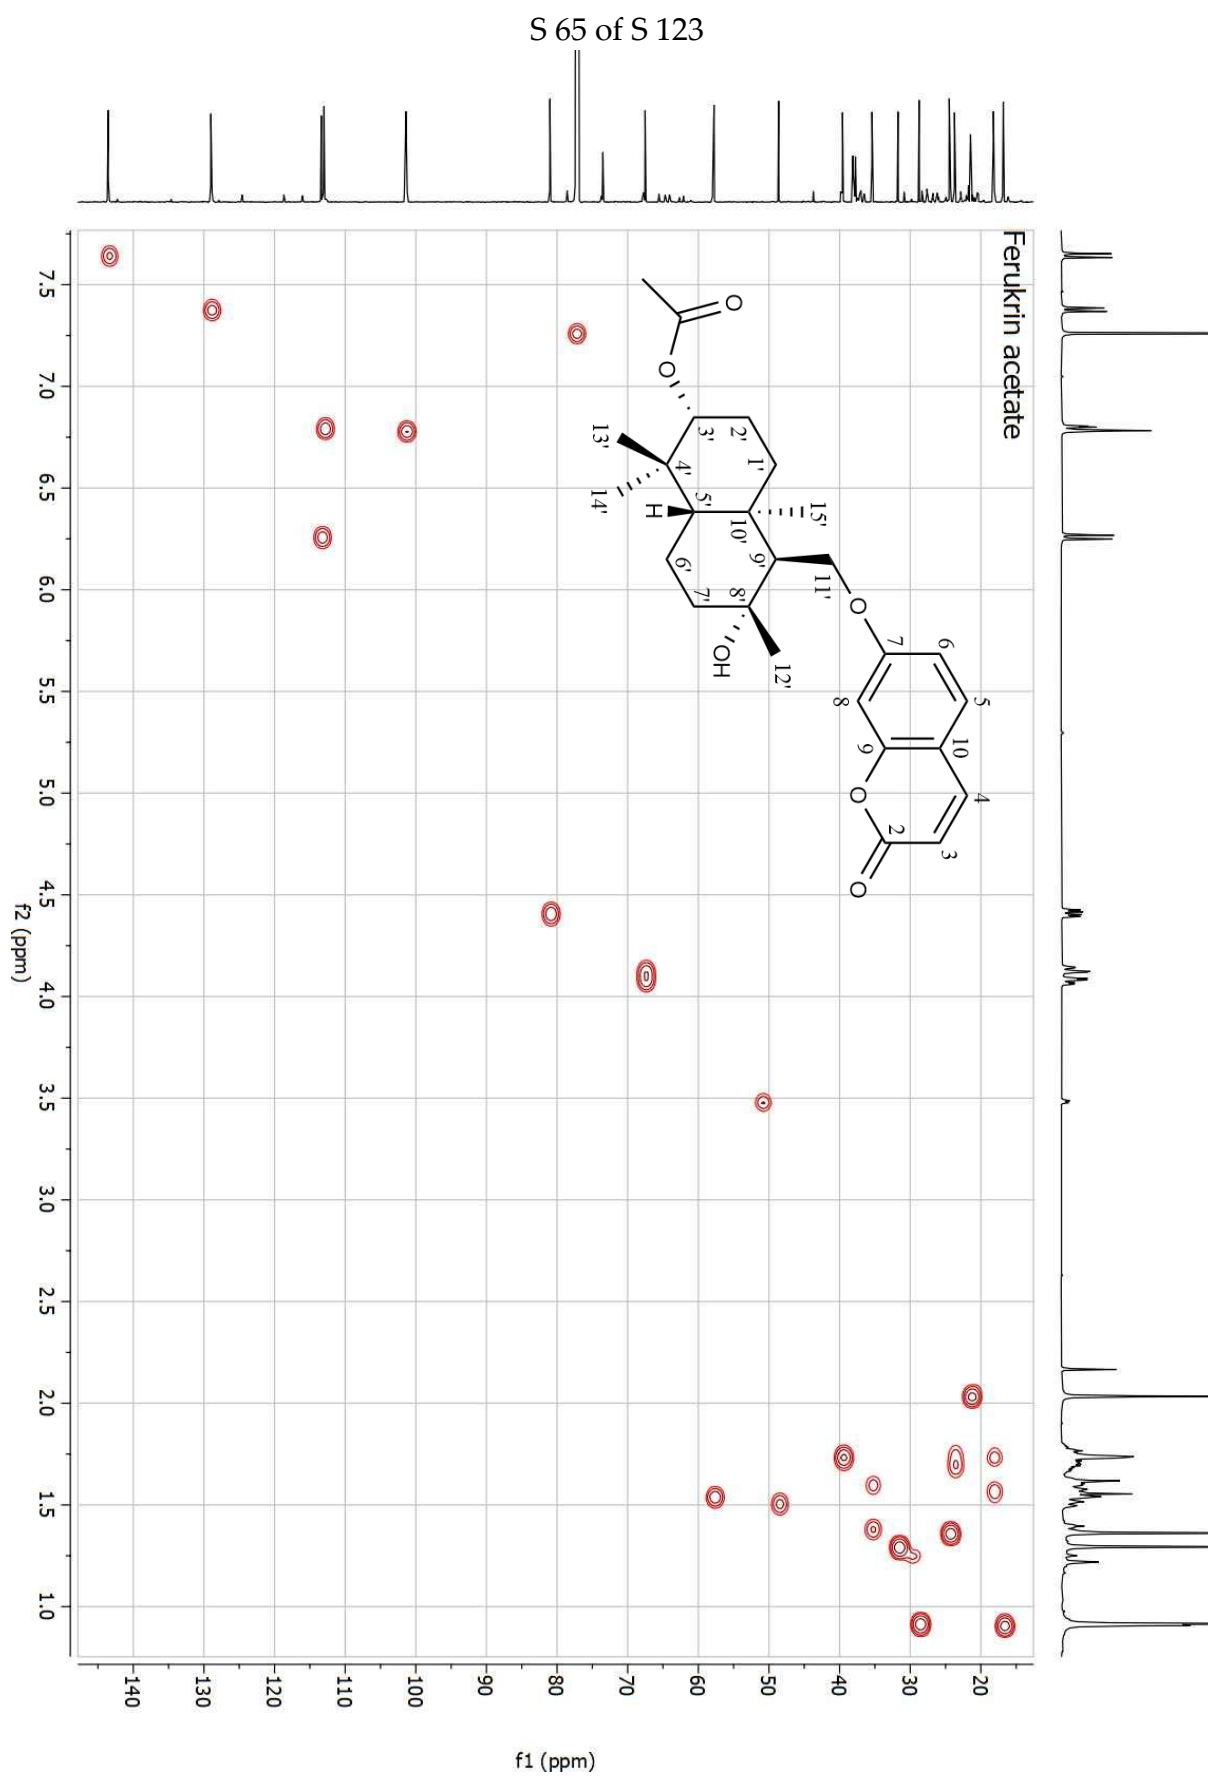

**Figure S59.** HSQC spectrum (CDCl<sub>3</sub>) of ferukrin acetate (10)

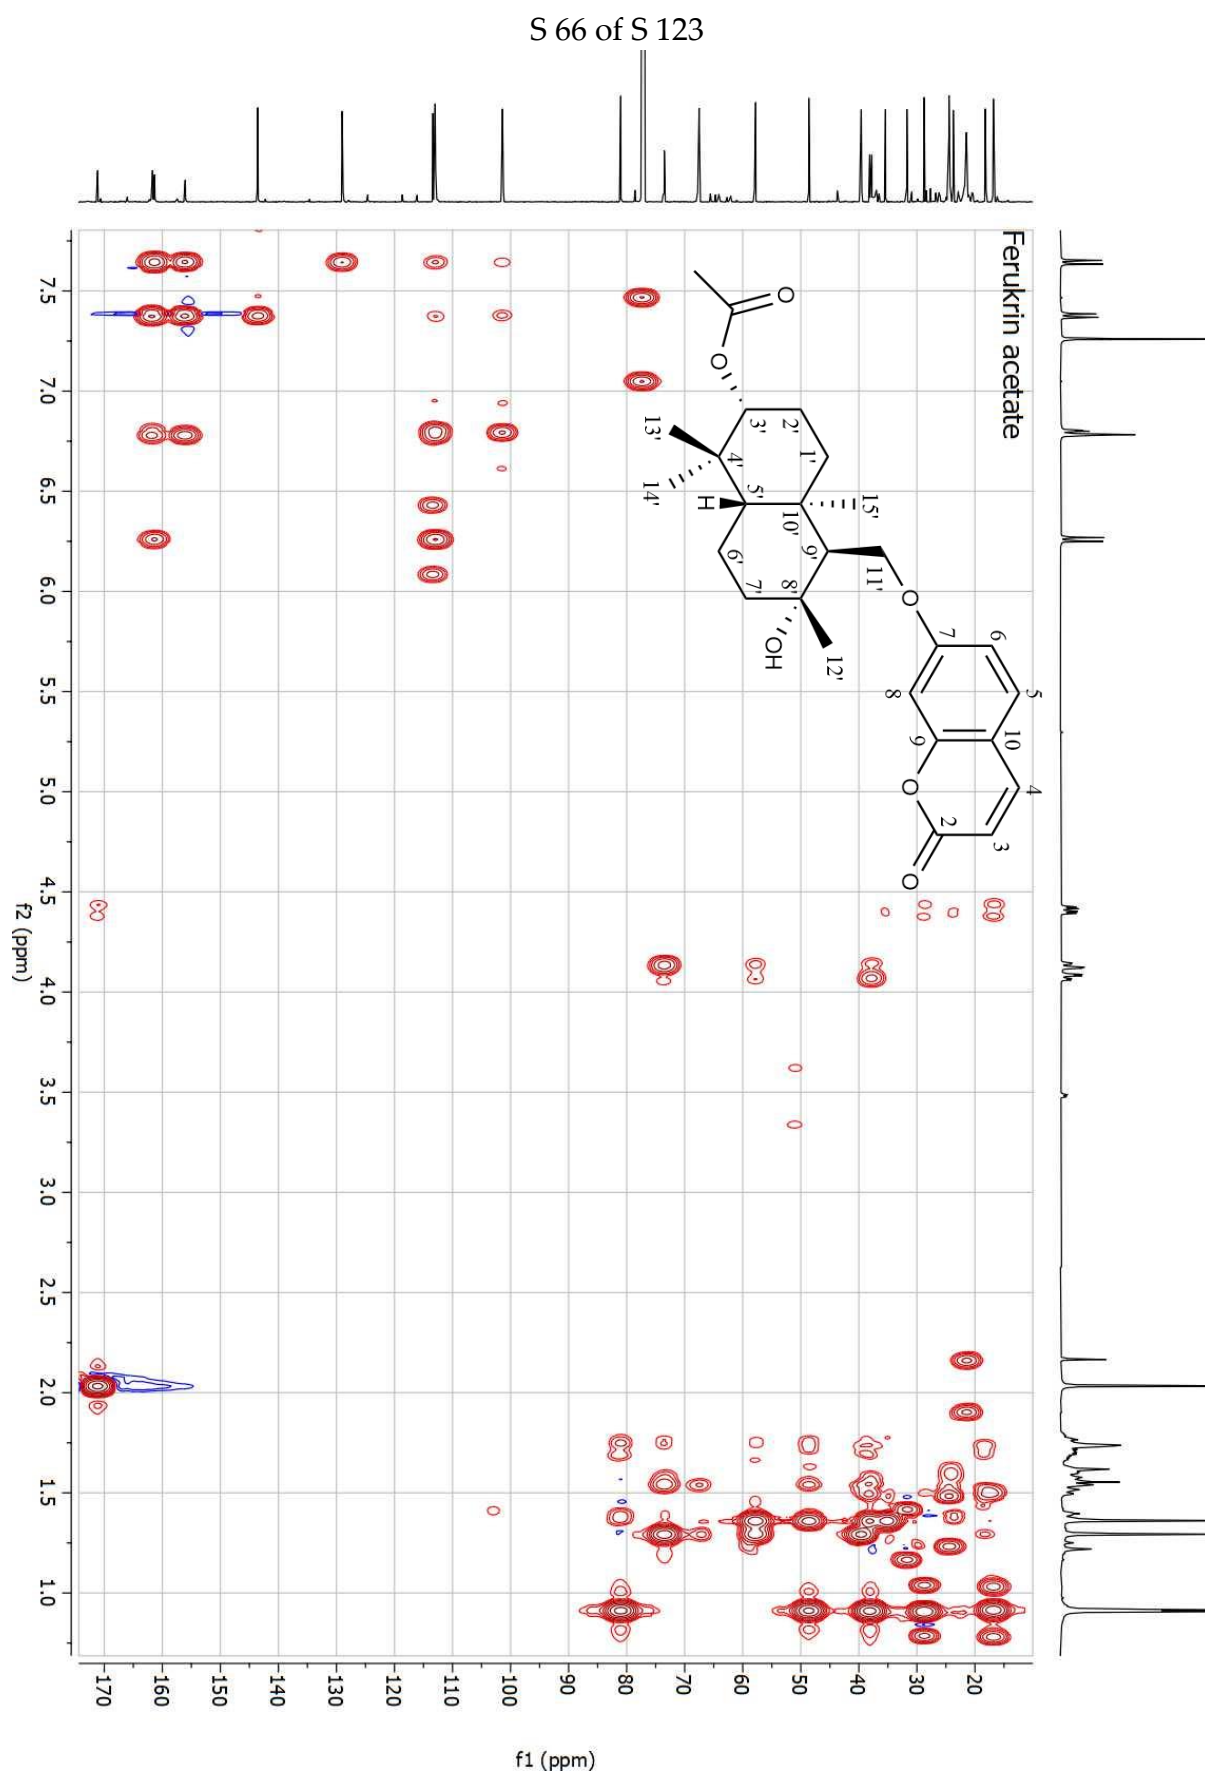

**Figure S60.** HMBC spectrum (CDCl<sub>3</sub>) of ferukrin acetate (10)

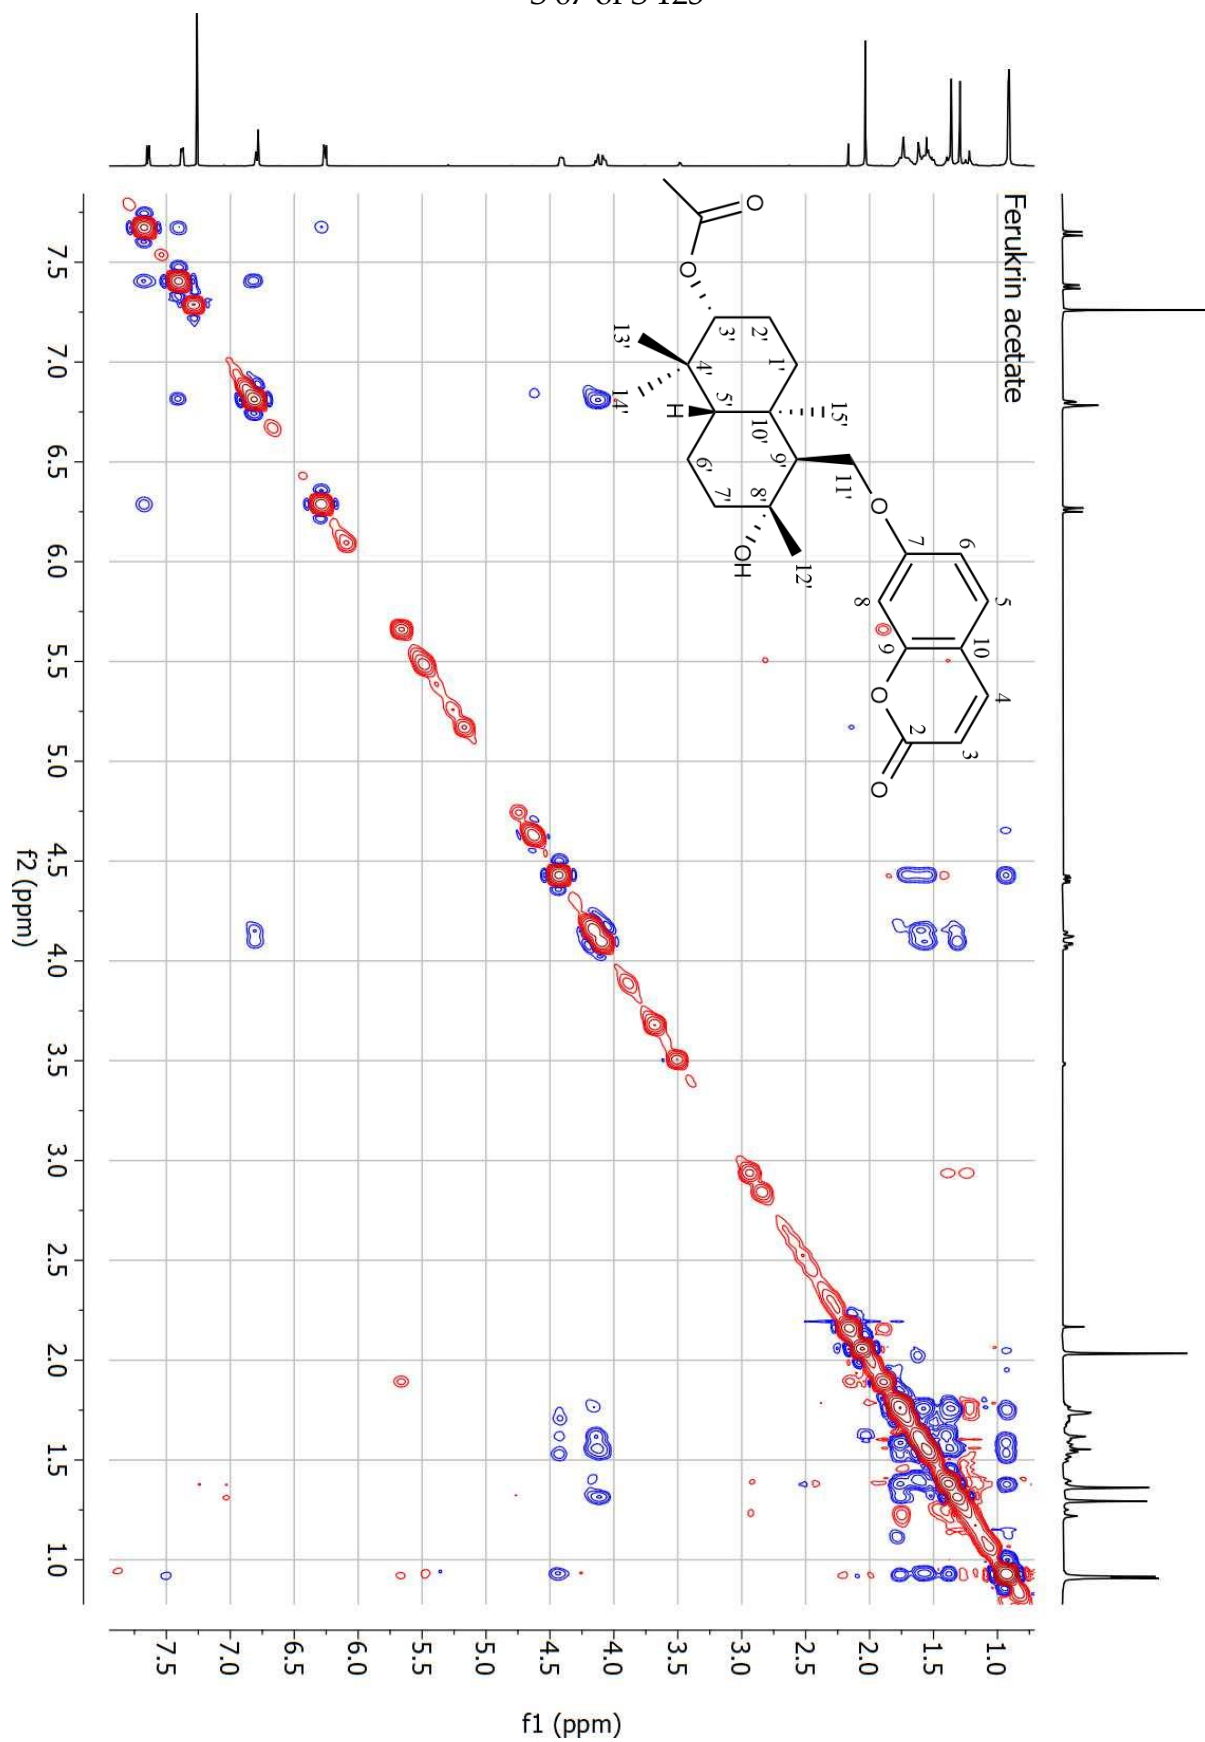**Figure S61.** NOESY spectrum (CDCl<sub>3</sub>) of ferukrin acetate (10)

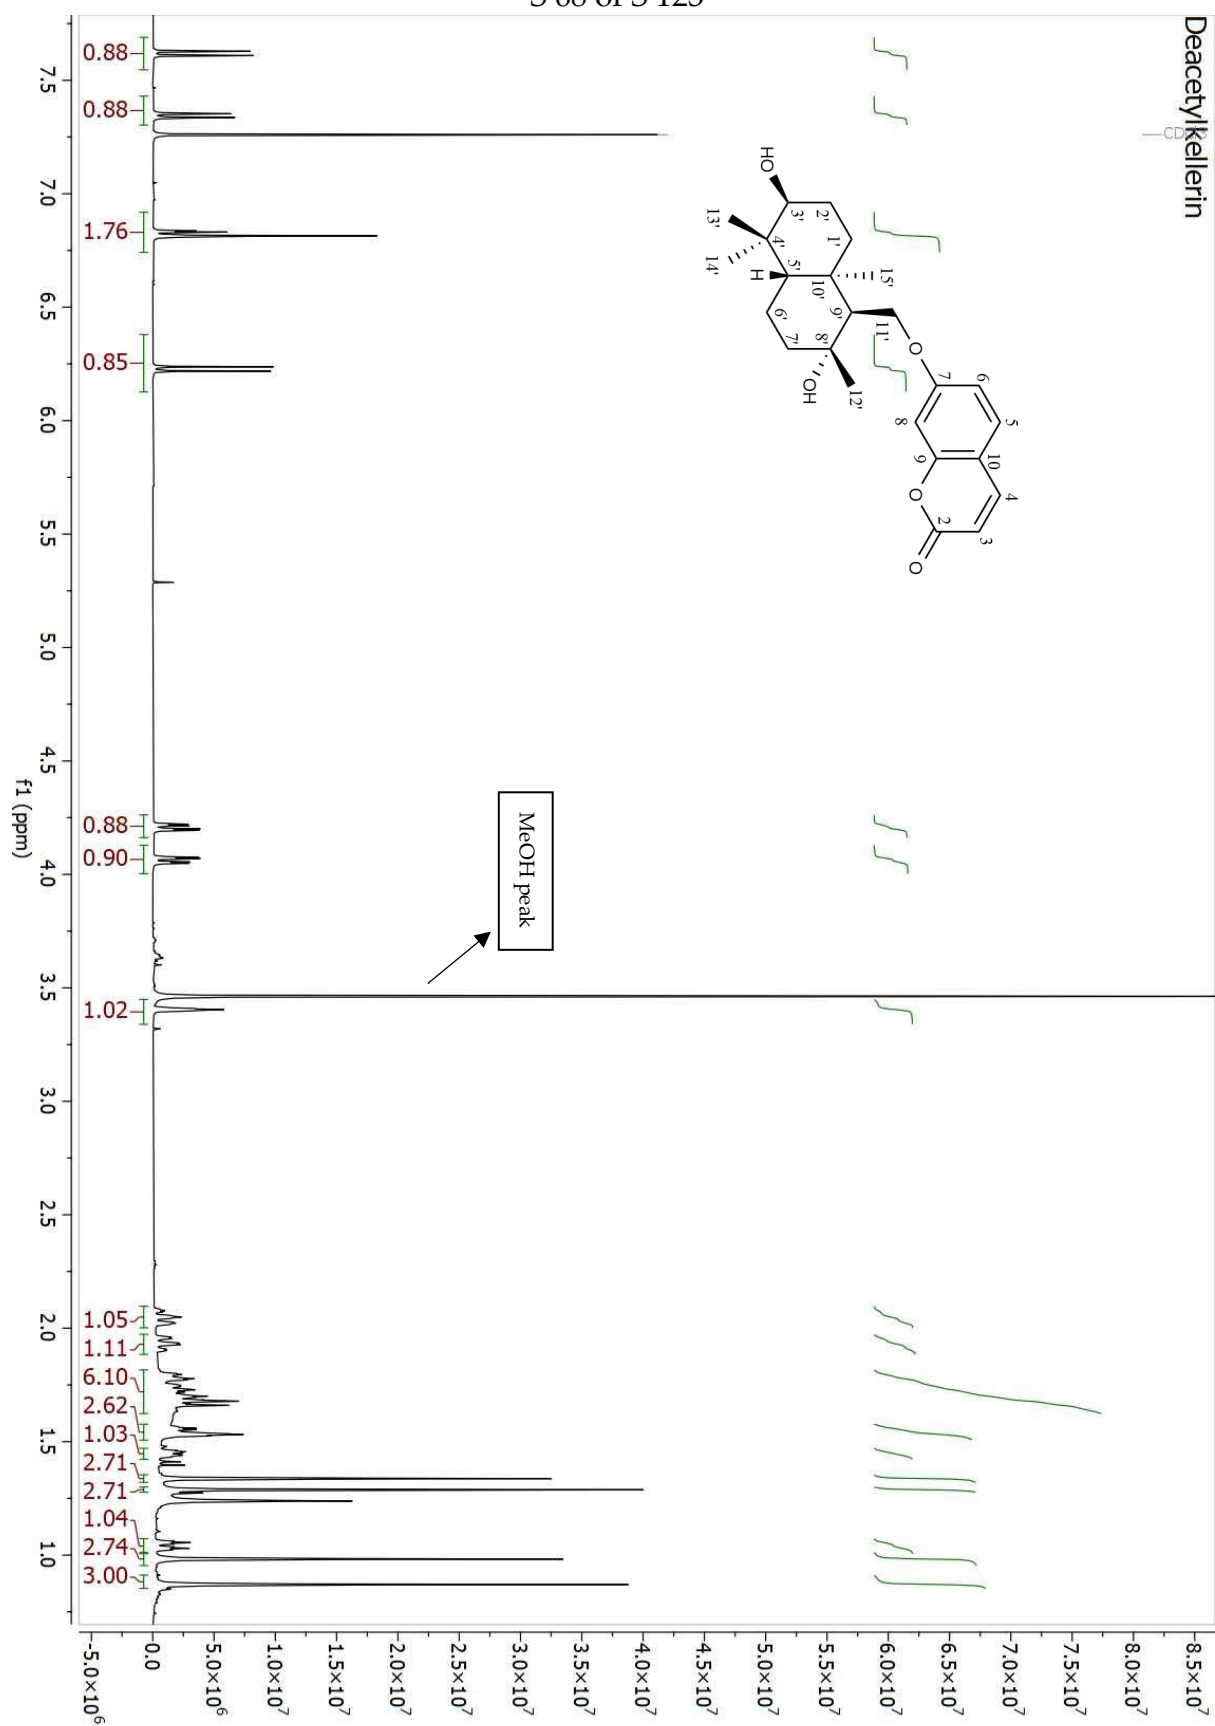

**Figure S62.**  $^1\text{H-NMR}$  spectrum (500 MHz,  $\text{CDCl}_3$ ) of deacetylkellerin (11)



S 69 of S 123

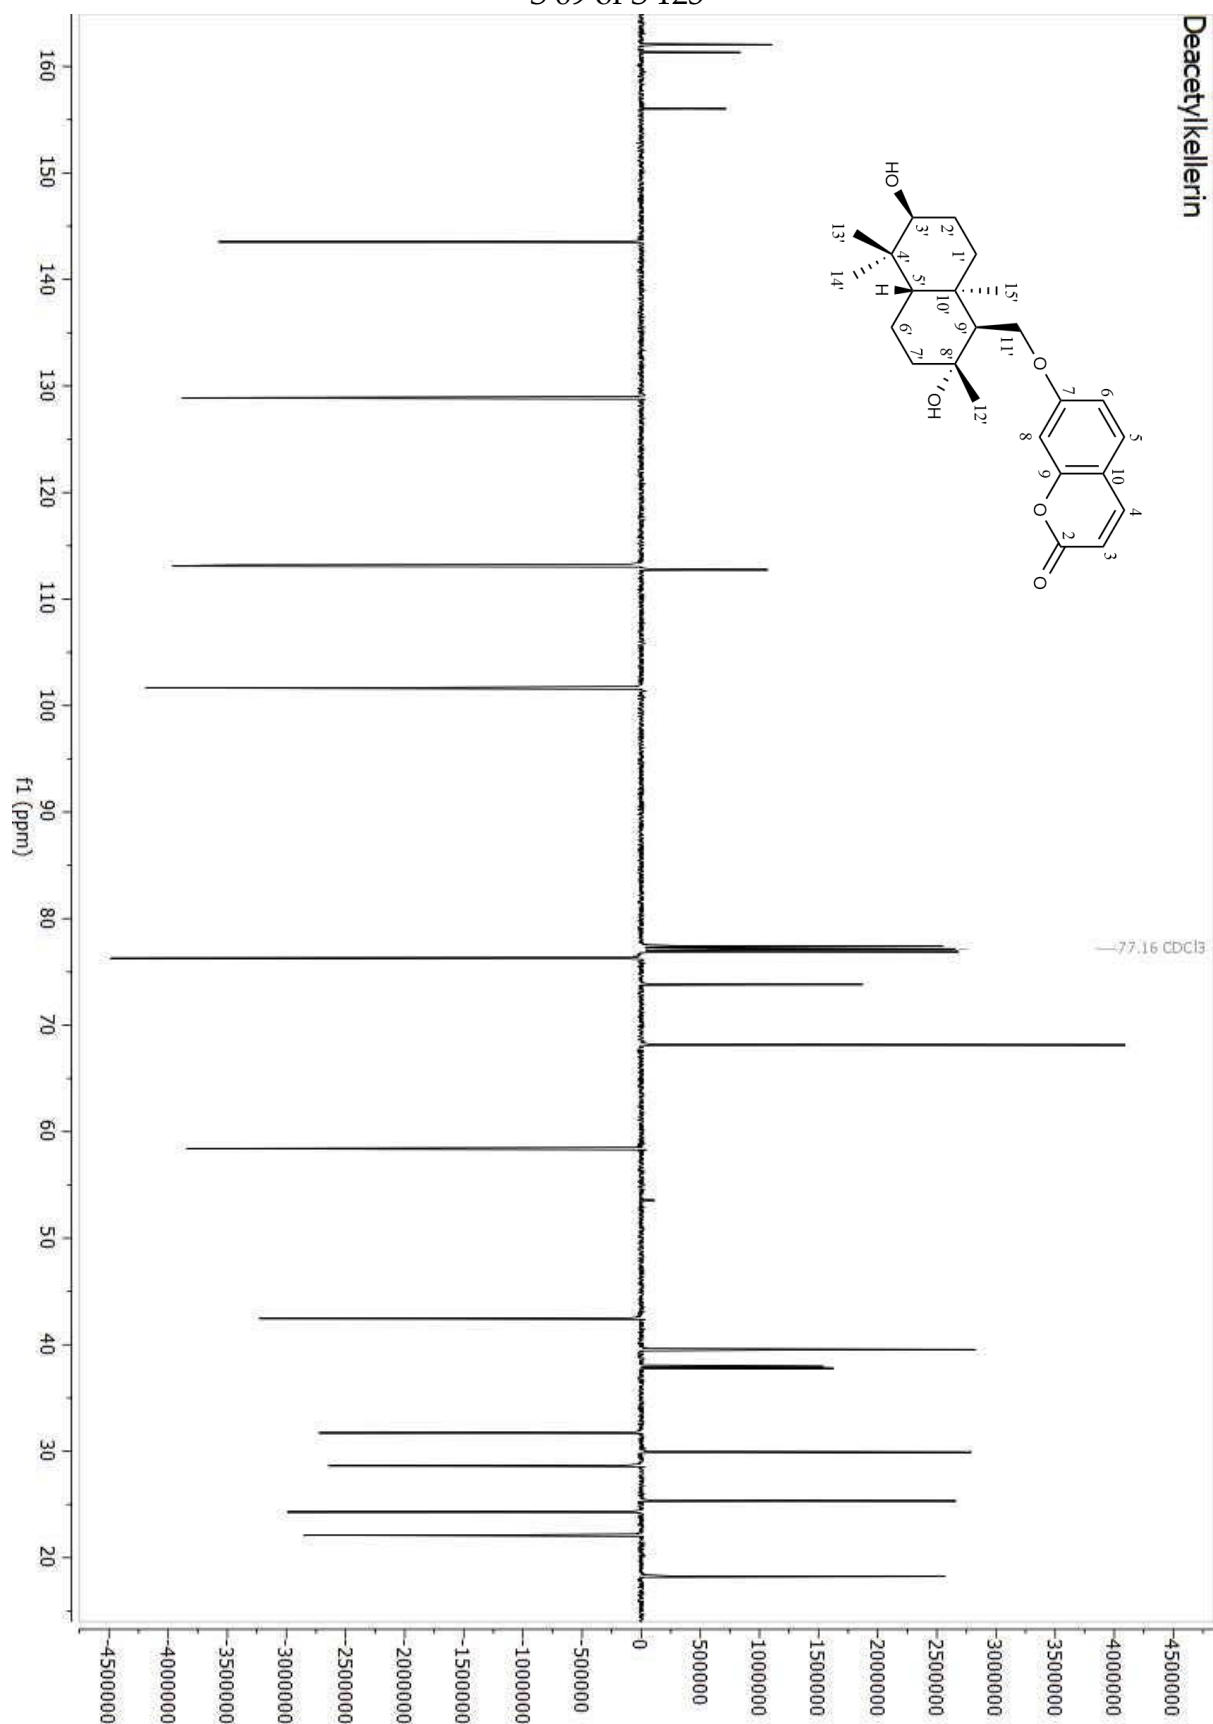**Figure S63.**  $^{13}\text{C}$ -NMR (APT) spectrum (125 MHz,  $\text{CDCl}_3$ ) of deacetylkellerin (11)

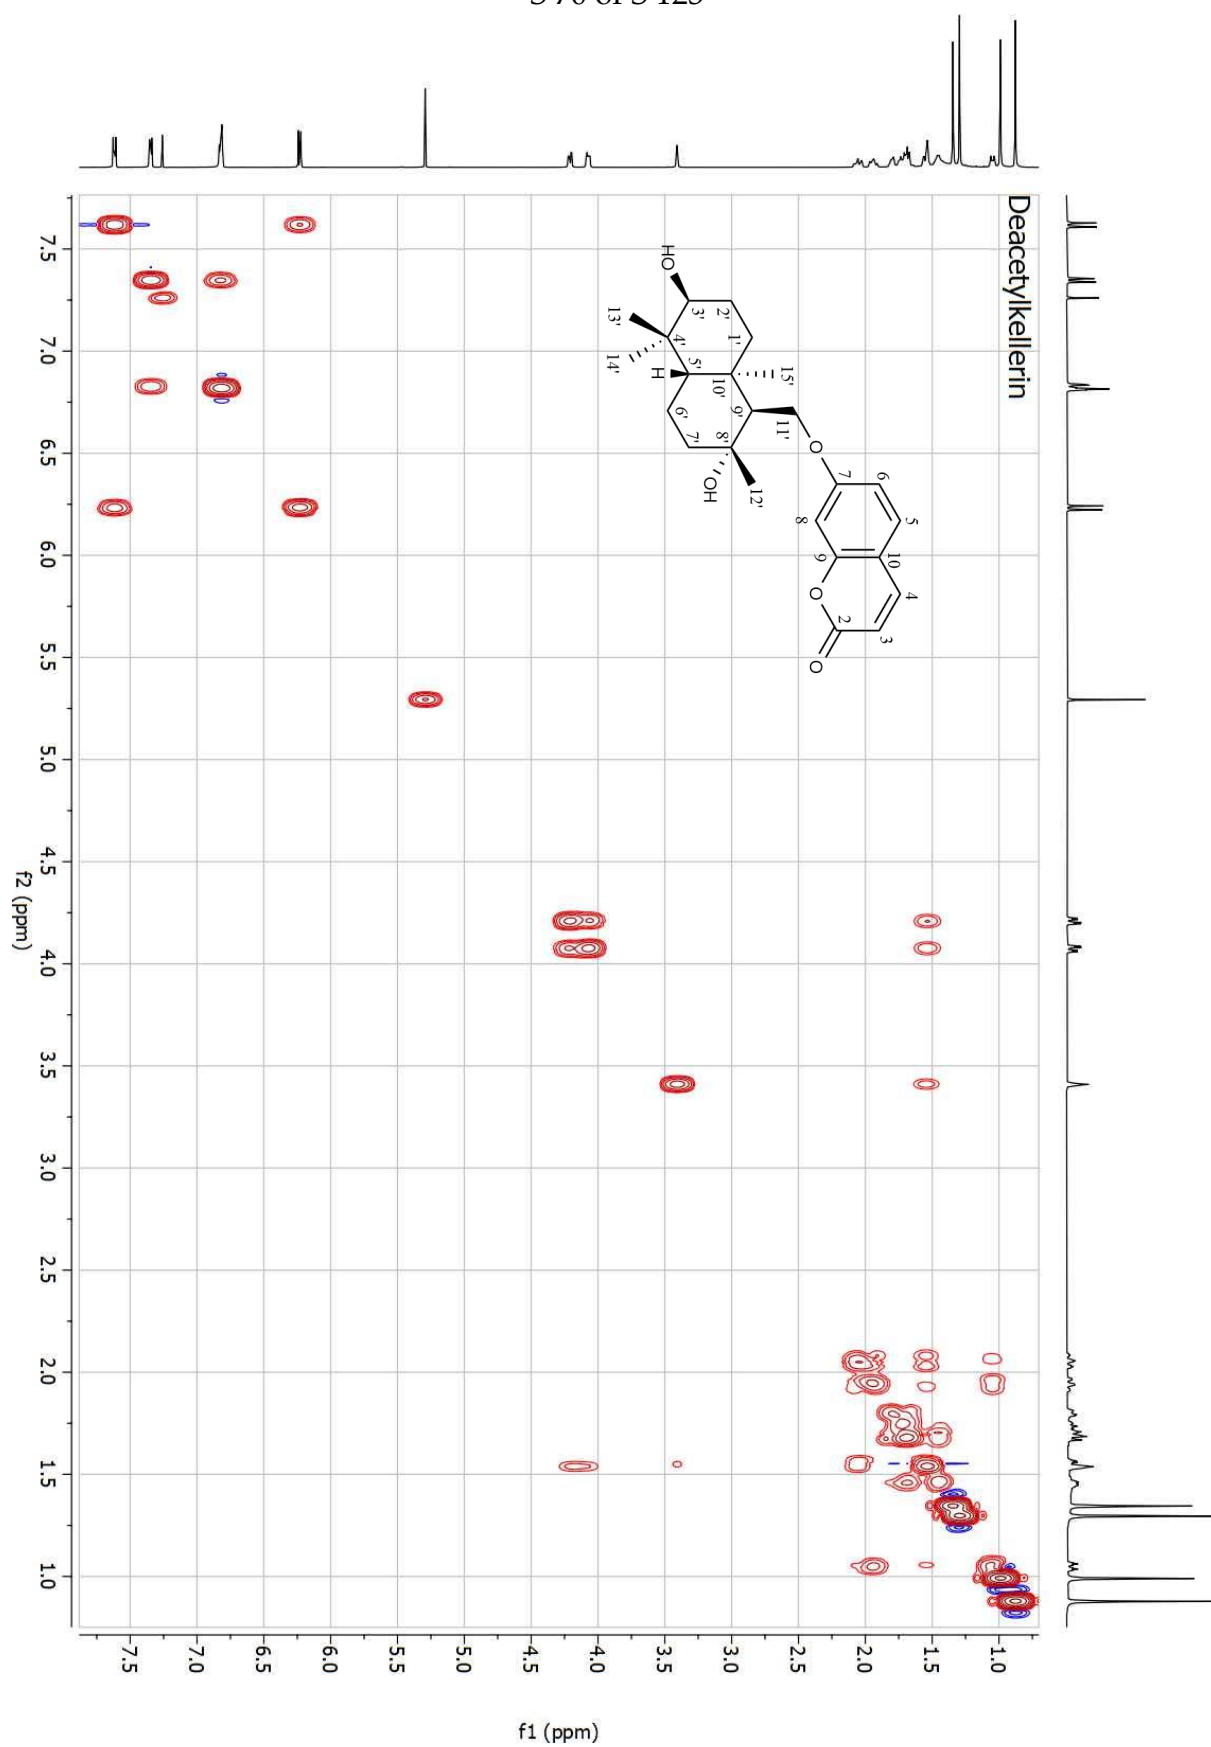

**Figure S64.** <sup>1</sup>H-<sup>1</sup>H COSY spectrum (CDCl<sub>3</sub>) of deacetylkellerin (11)

S 71 of S 123

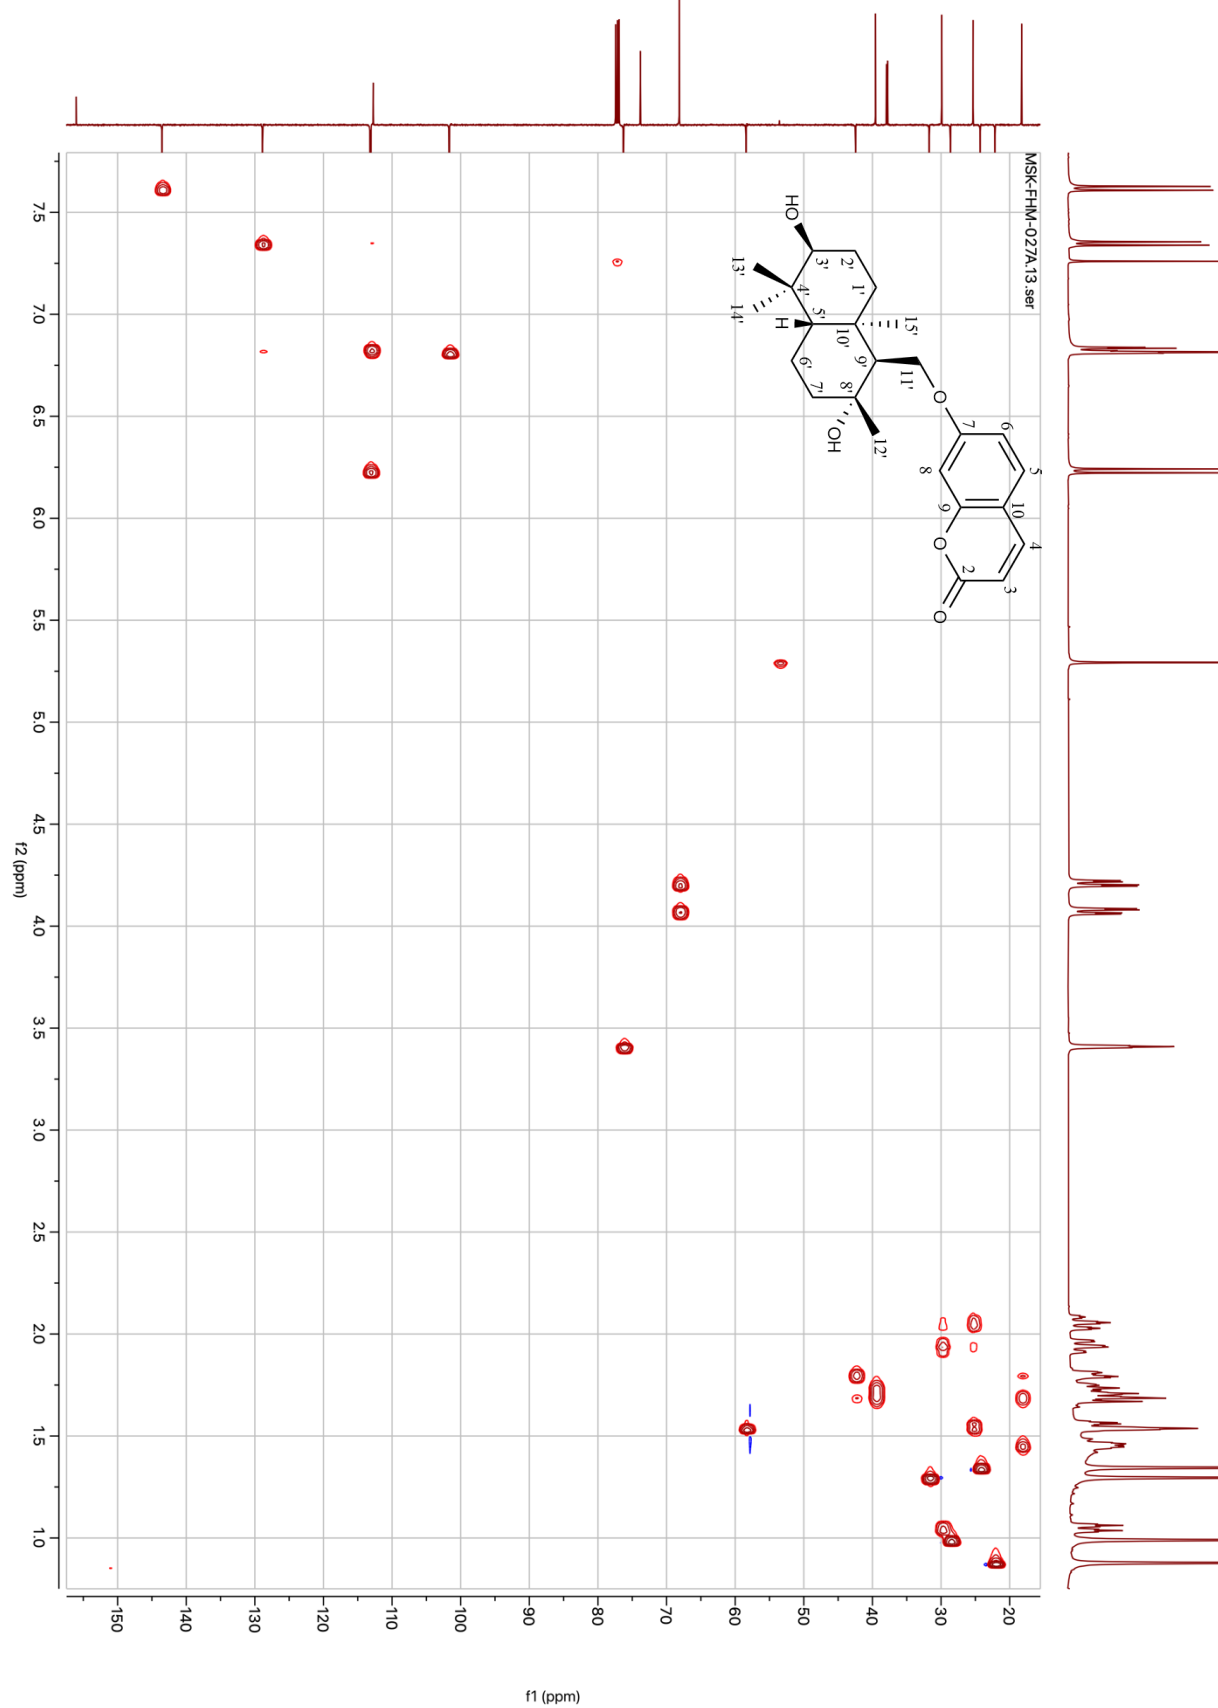**Figure S65.** HSQC spectrum ( $\text{CDCl}_3$ ) of deacetylkellerin (11)

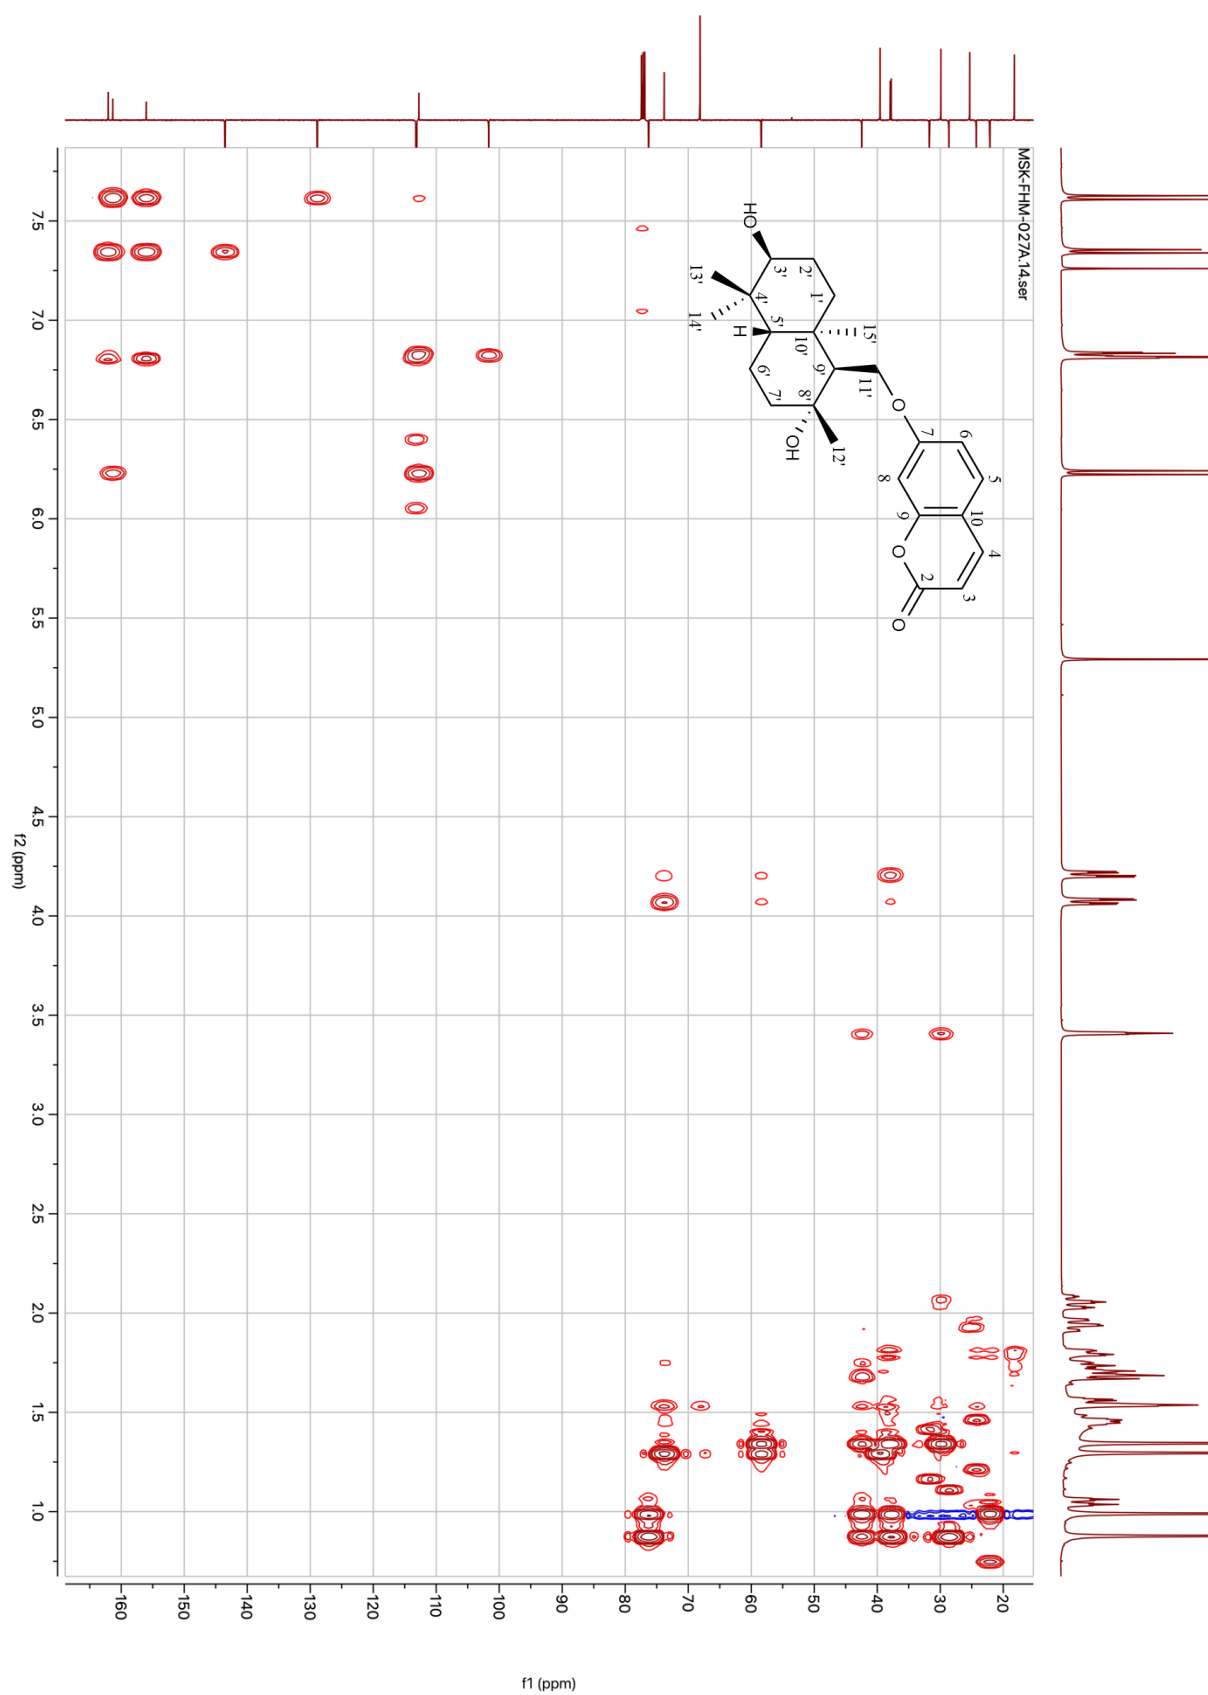**Figure S66.** HMBC spectrum (CDCl<sub>3</sub>) of deacetylkellerin (11)

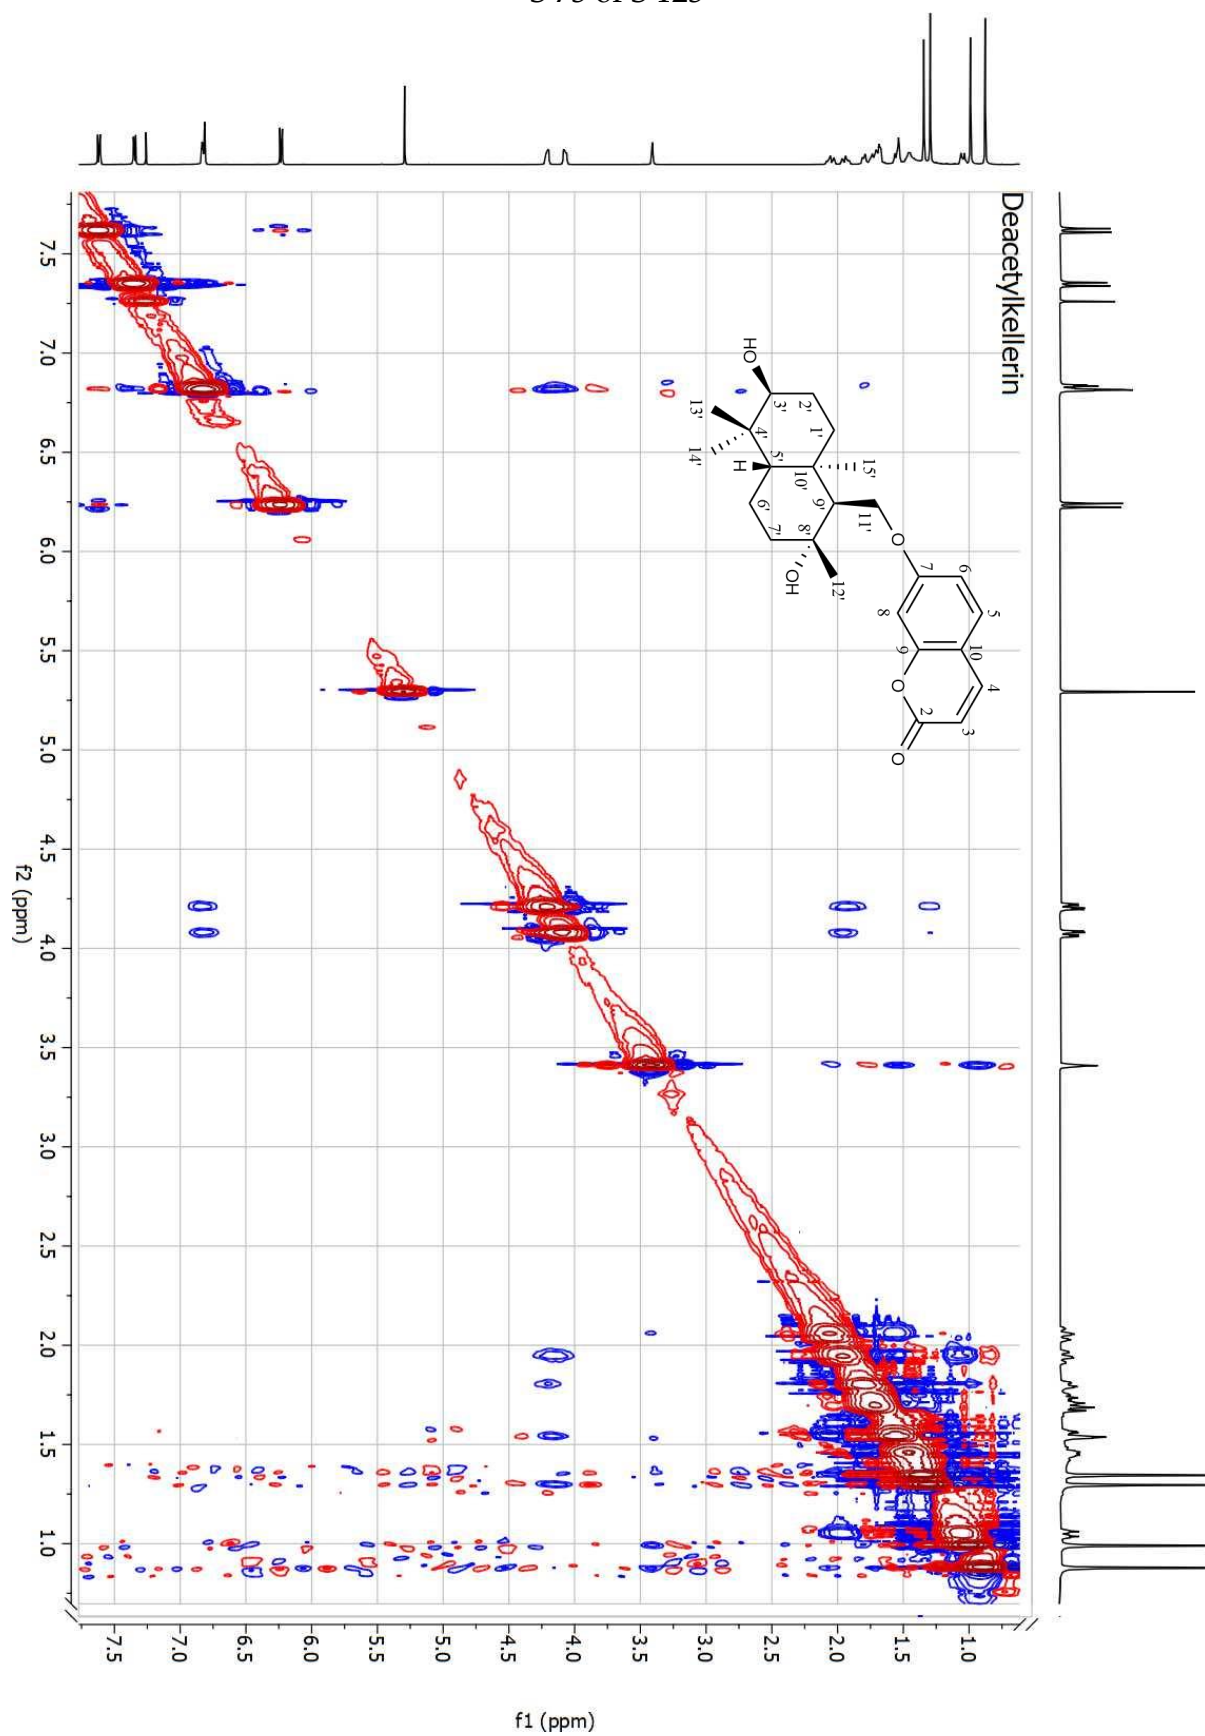

**Figure S67.** NOESY spectrum (CDCl<sub>3</sub>) of deacetylkellerin (11)

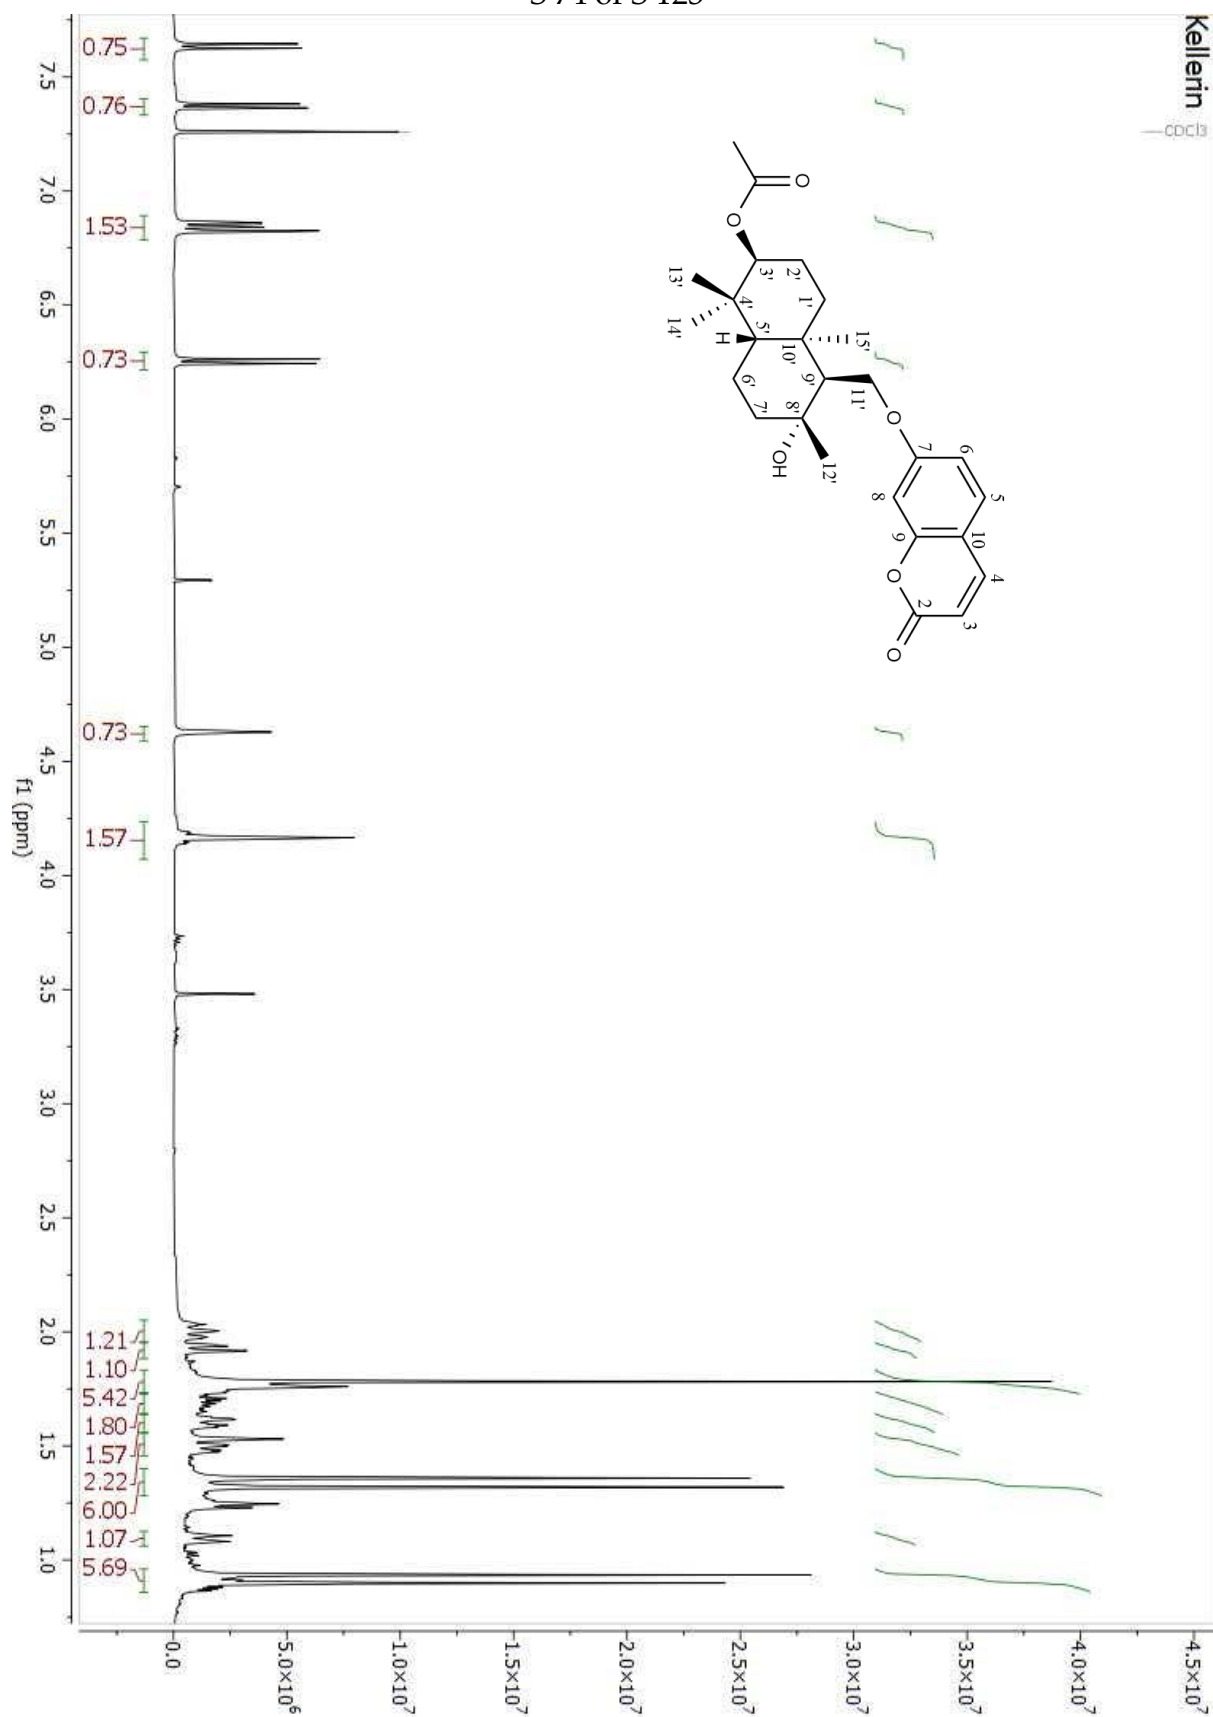

**Figure S68.** <sup>1</sup>H-NMR spectrum (500 MHz, CDCl<sub>3</sub>) of kellerin (12)

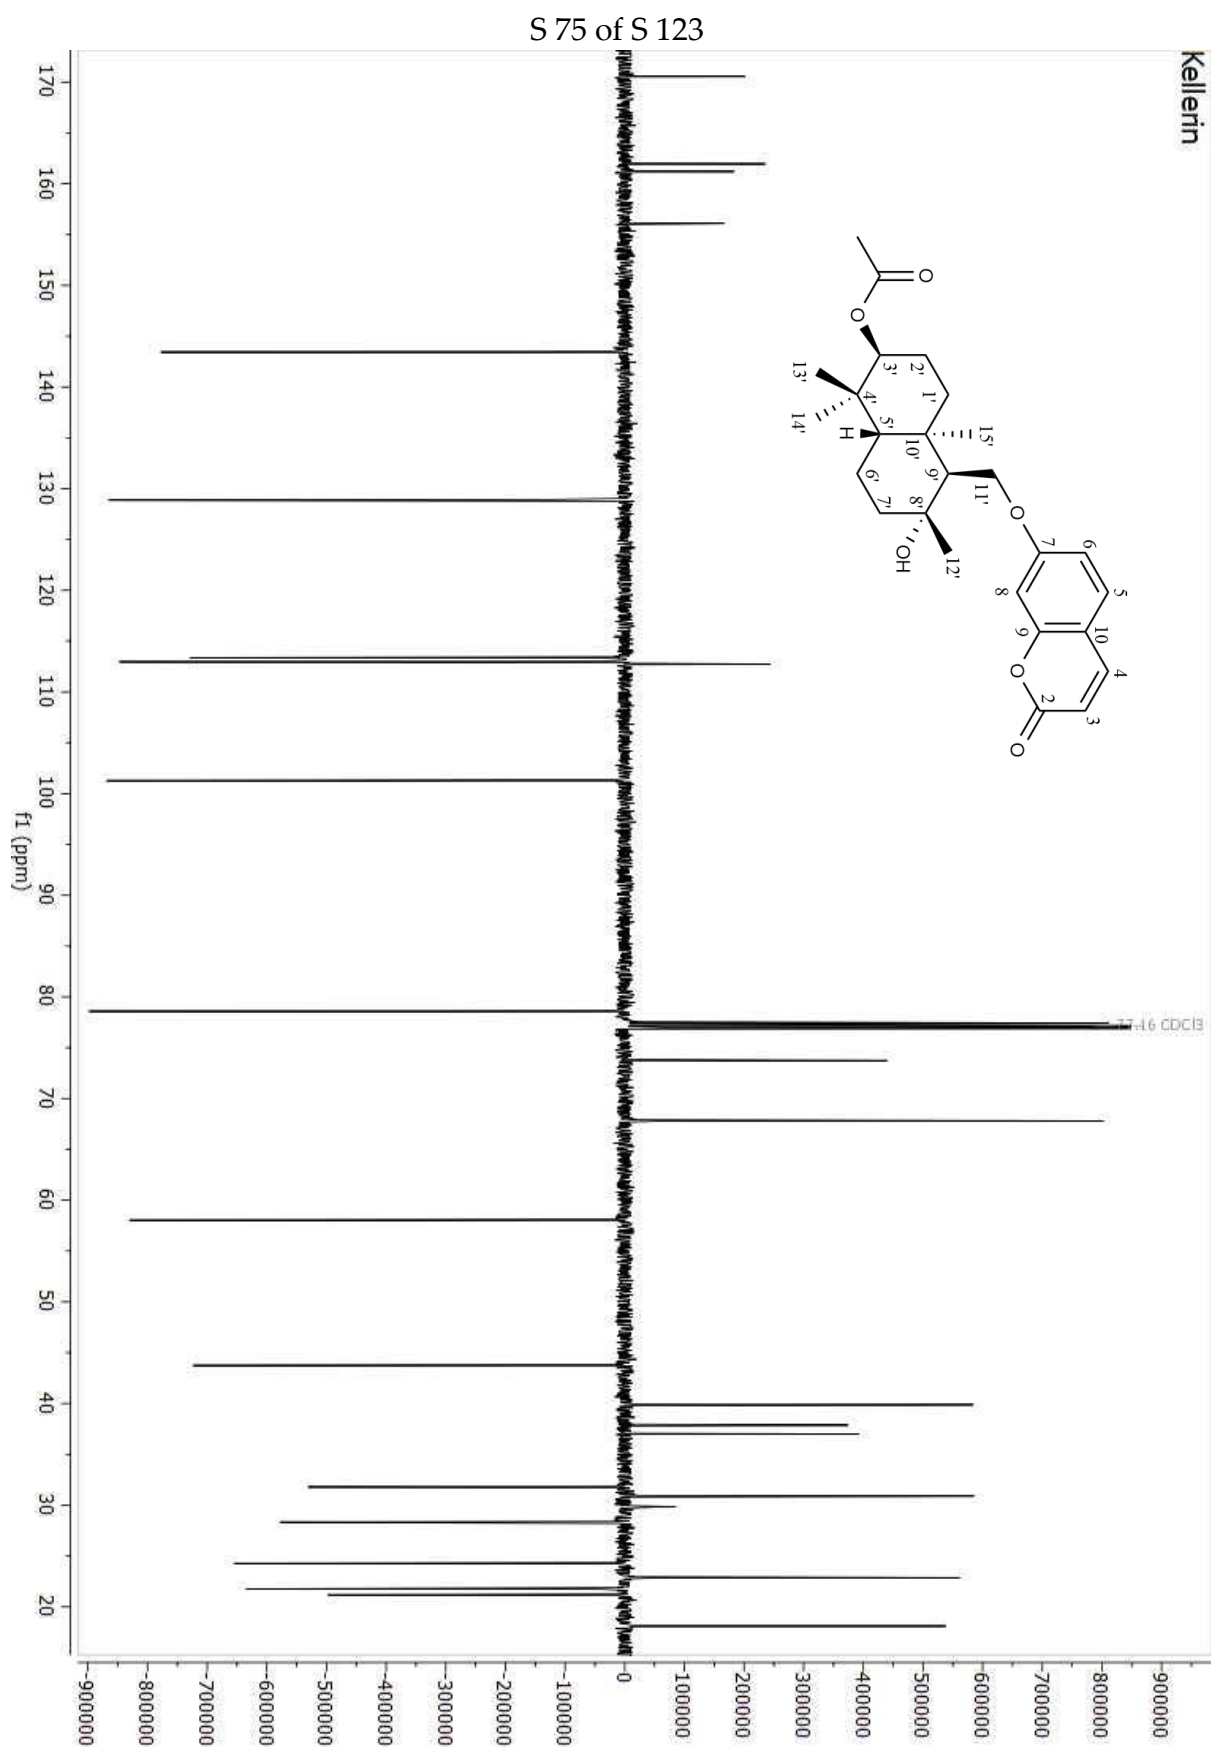

**Figure S69.**  $^{13}\text{C}$ -NMR (APT) spectrum (125 MHz,  $\text{CDCl}_3$ ) of kellerin (12)

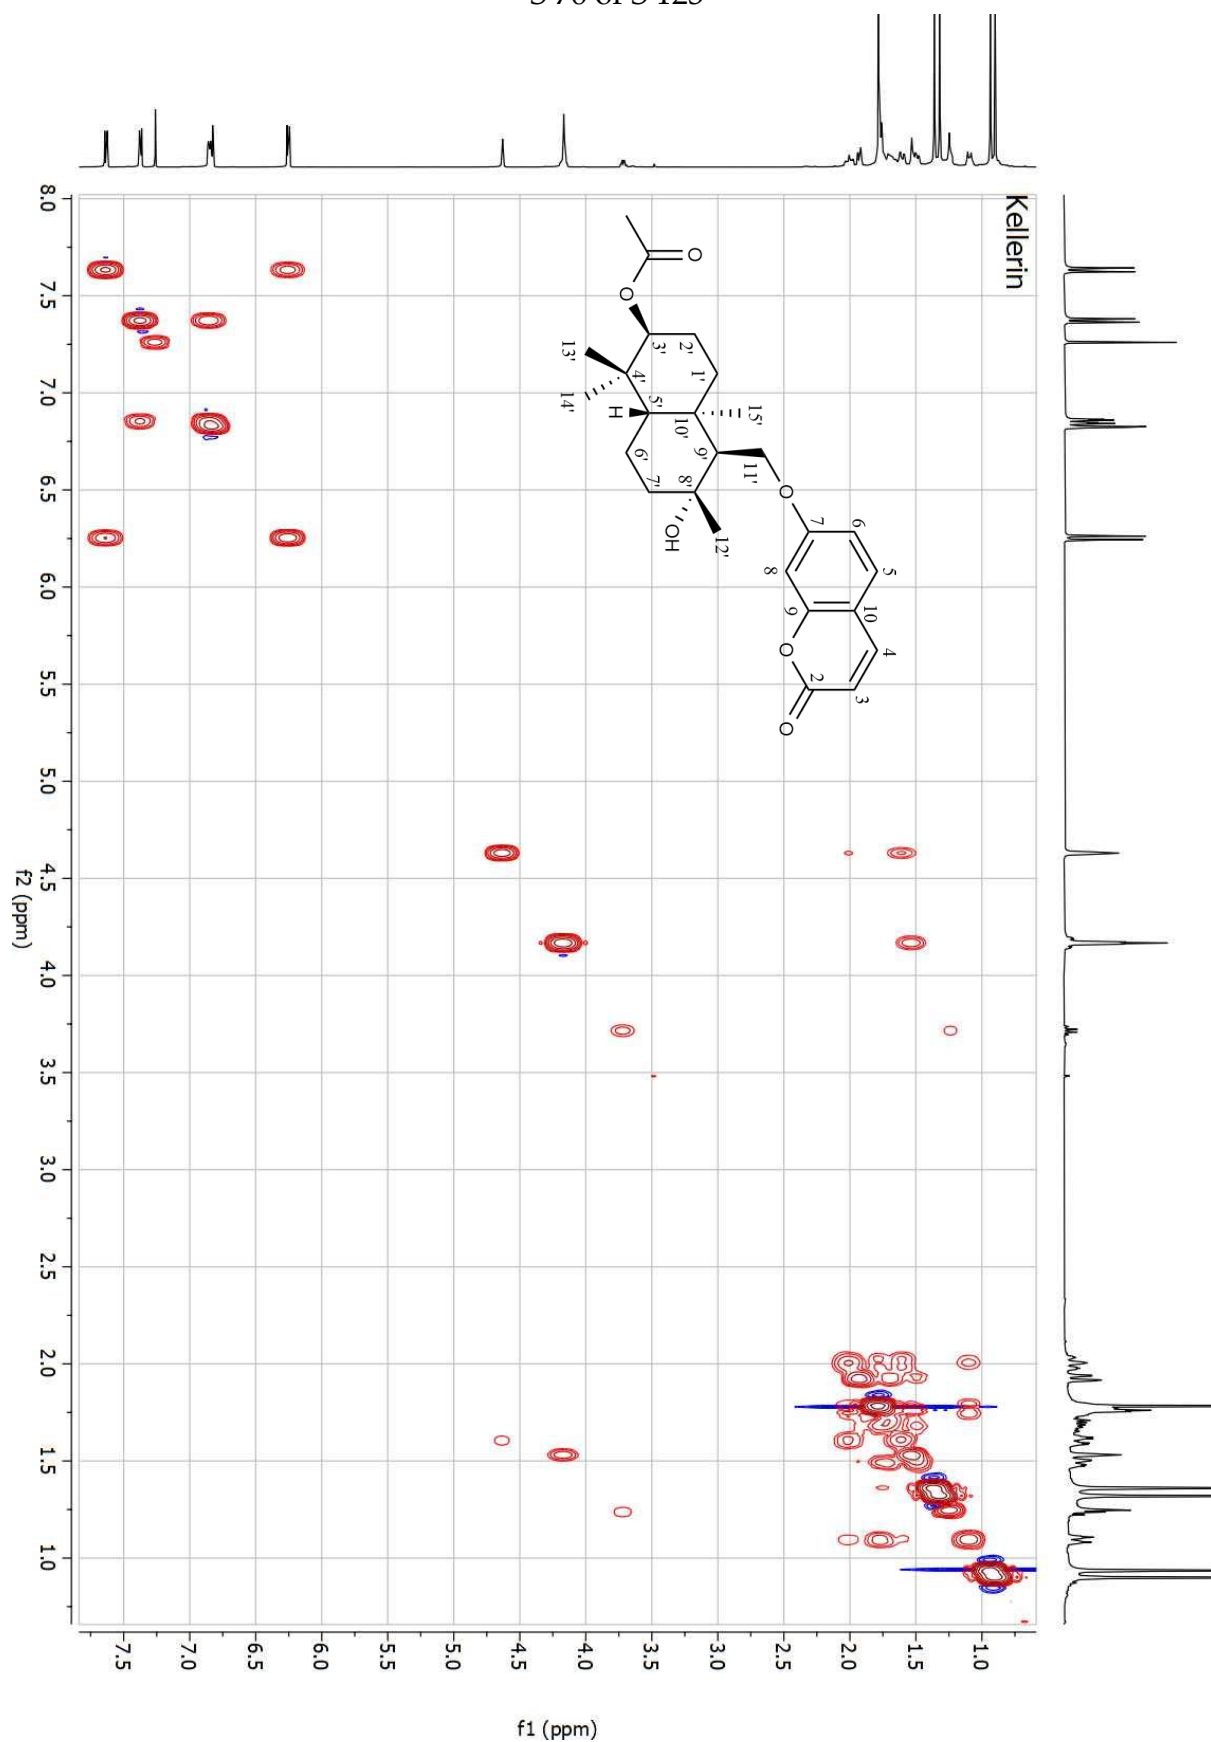**Figure S70.**  $^1\text{H}$ - $^1\text{H}$  COSY spectrum ( $\text{CDCl}_3$ ) of kellerin (12)



S 77 of S 123

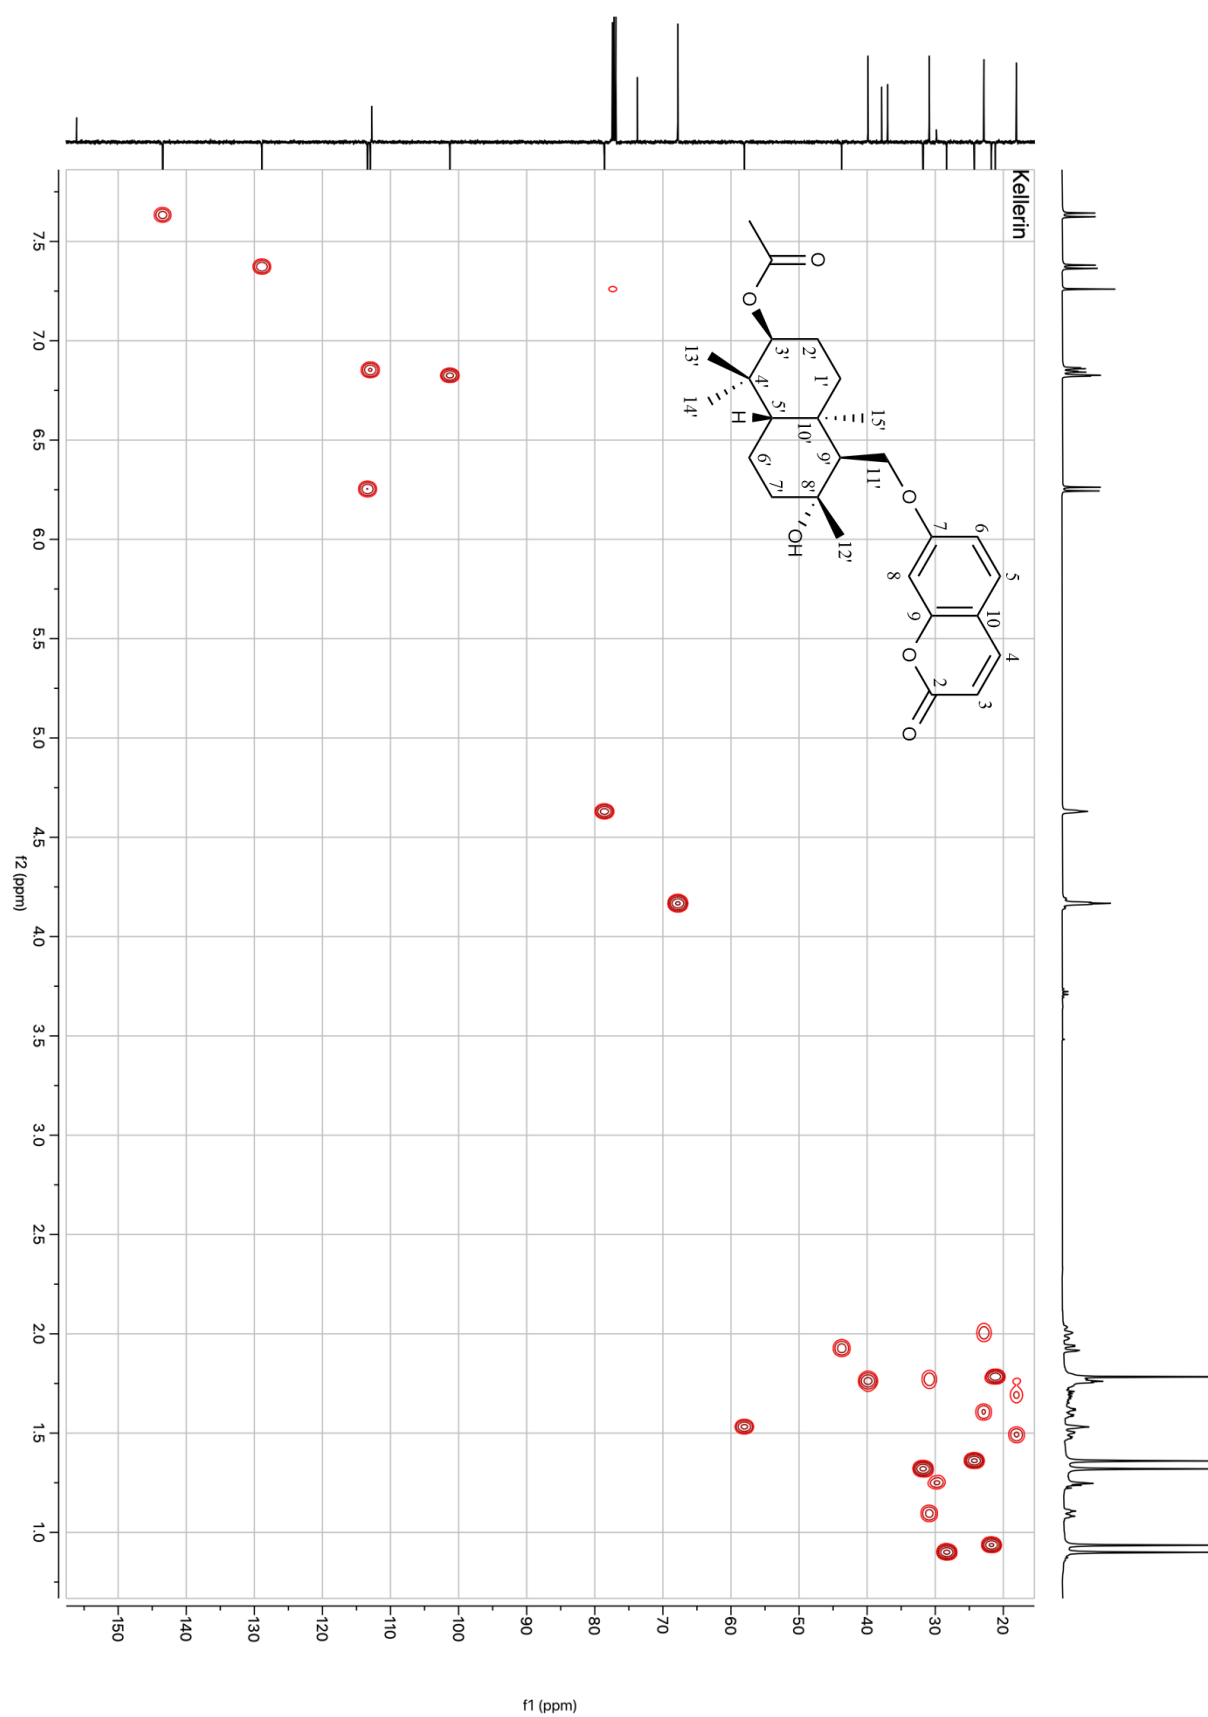**Figure S71.** HSQC spectrum (CDCl<sub>3</sub>) of kellerin (12)

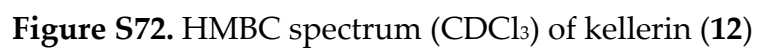

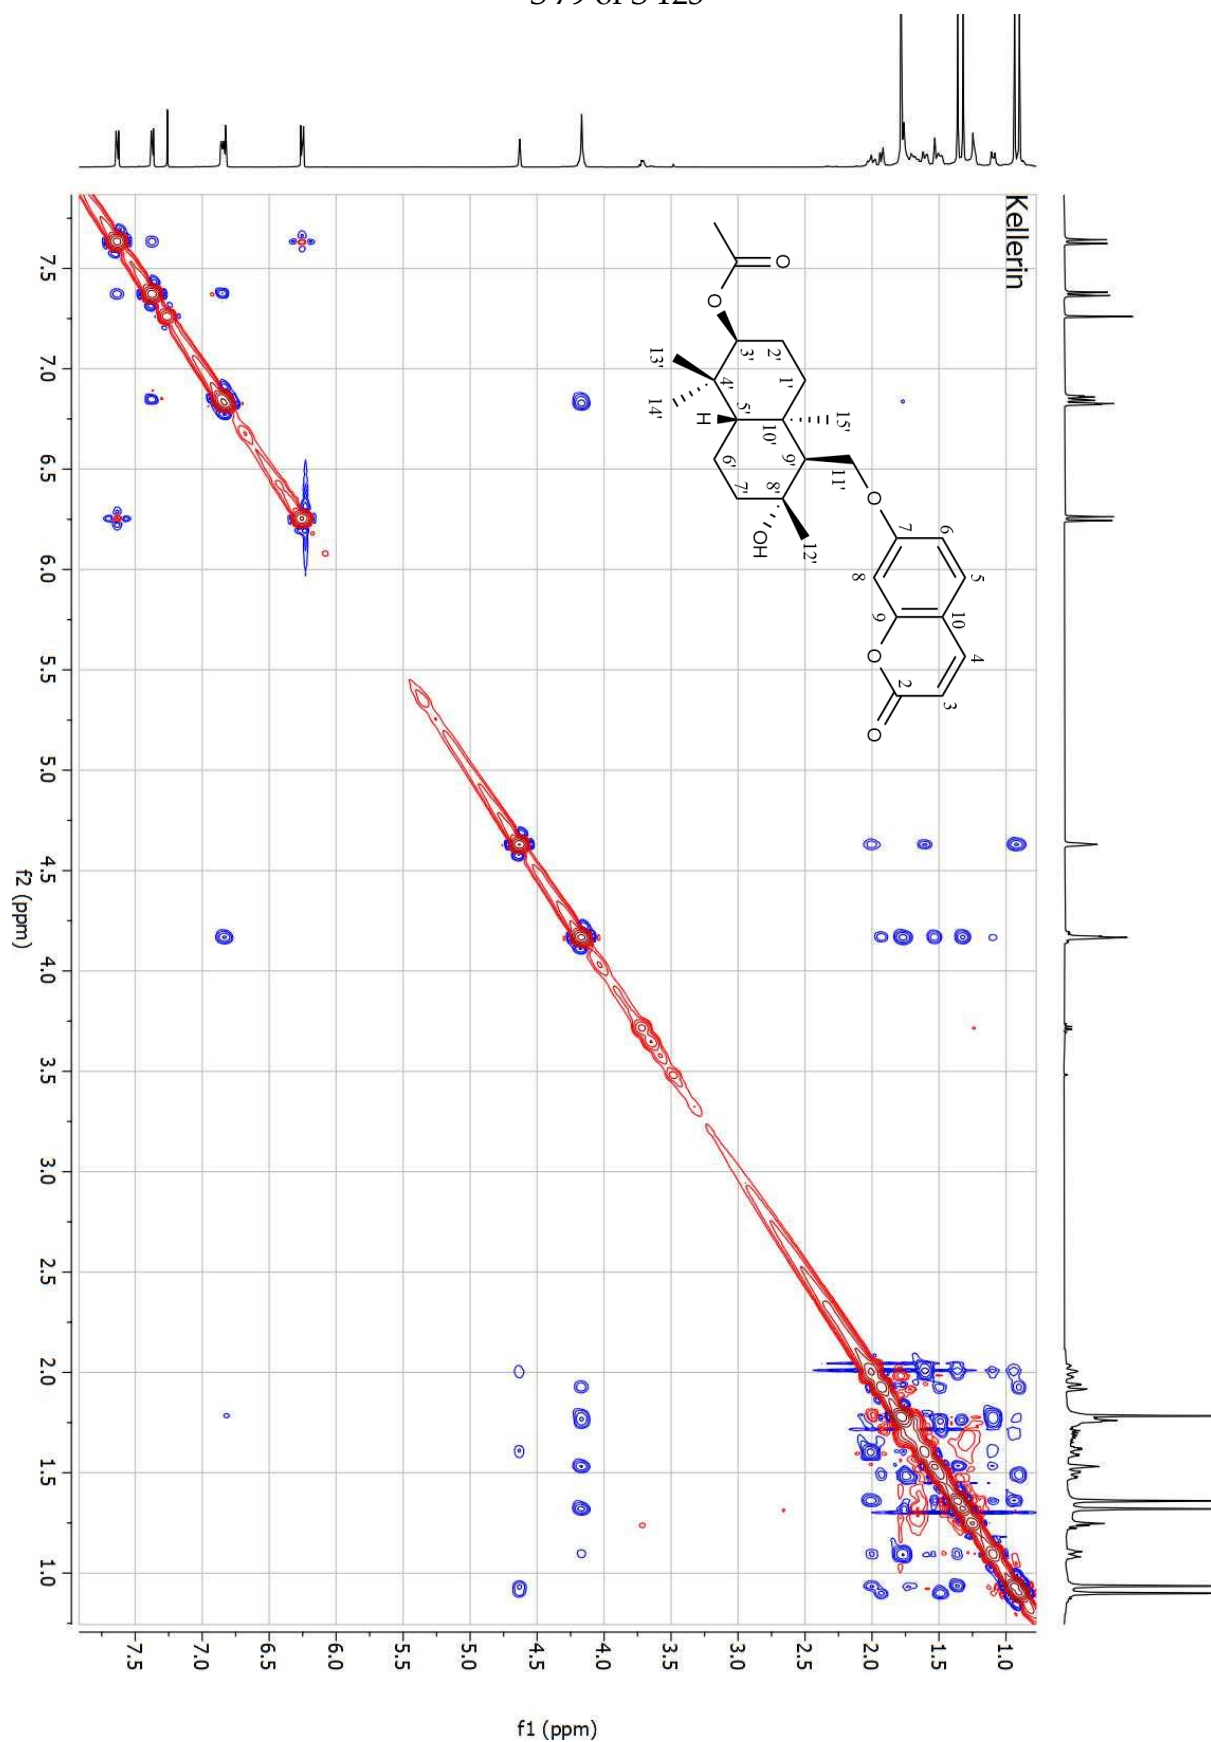**Figure S73.** NOESY spectrum ( $\text{CDCl}_3$ ) of kellerin (12)

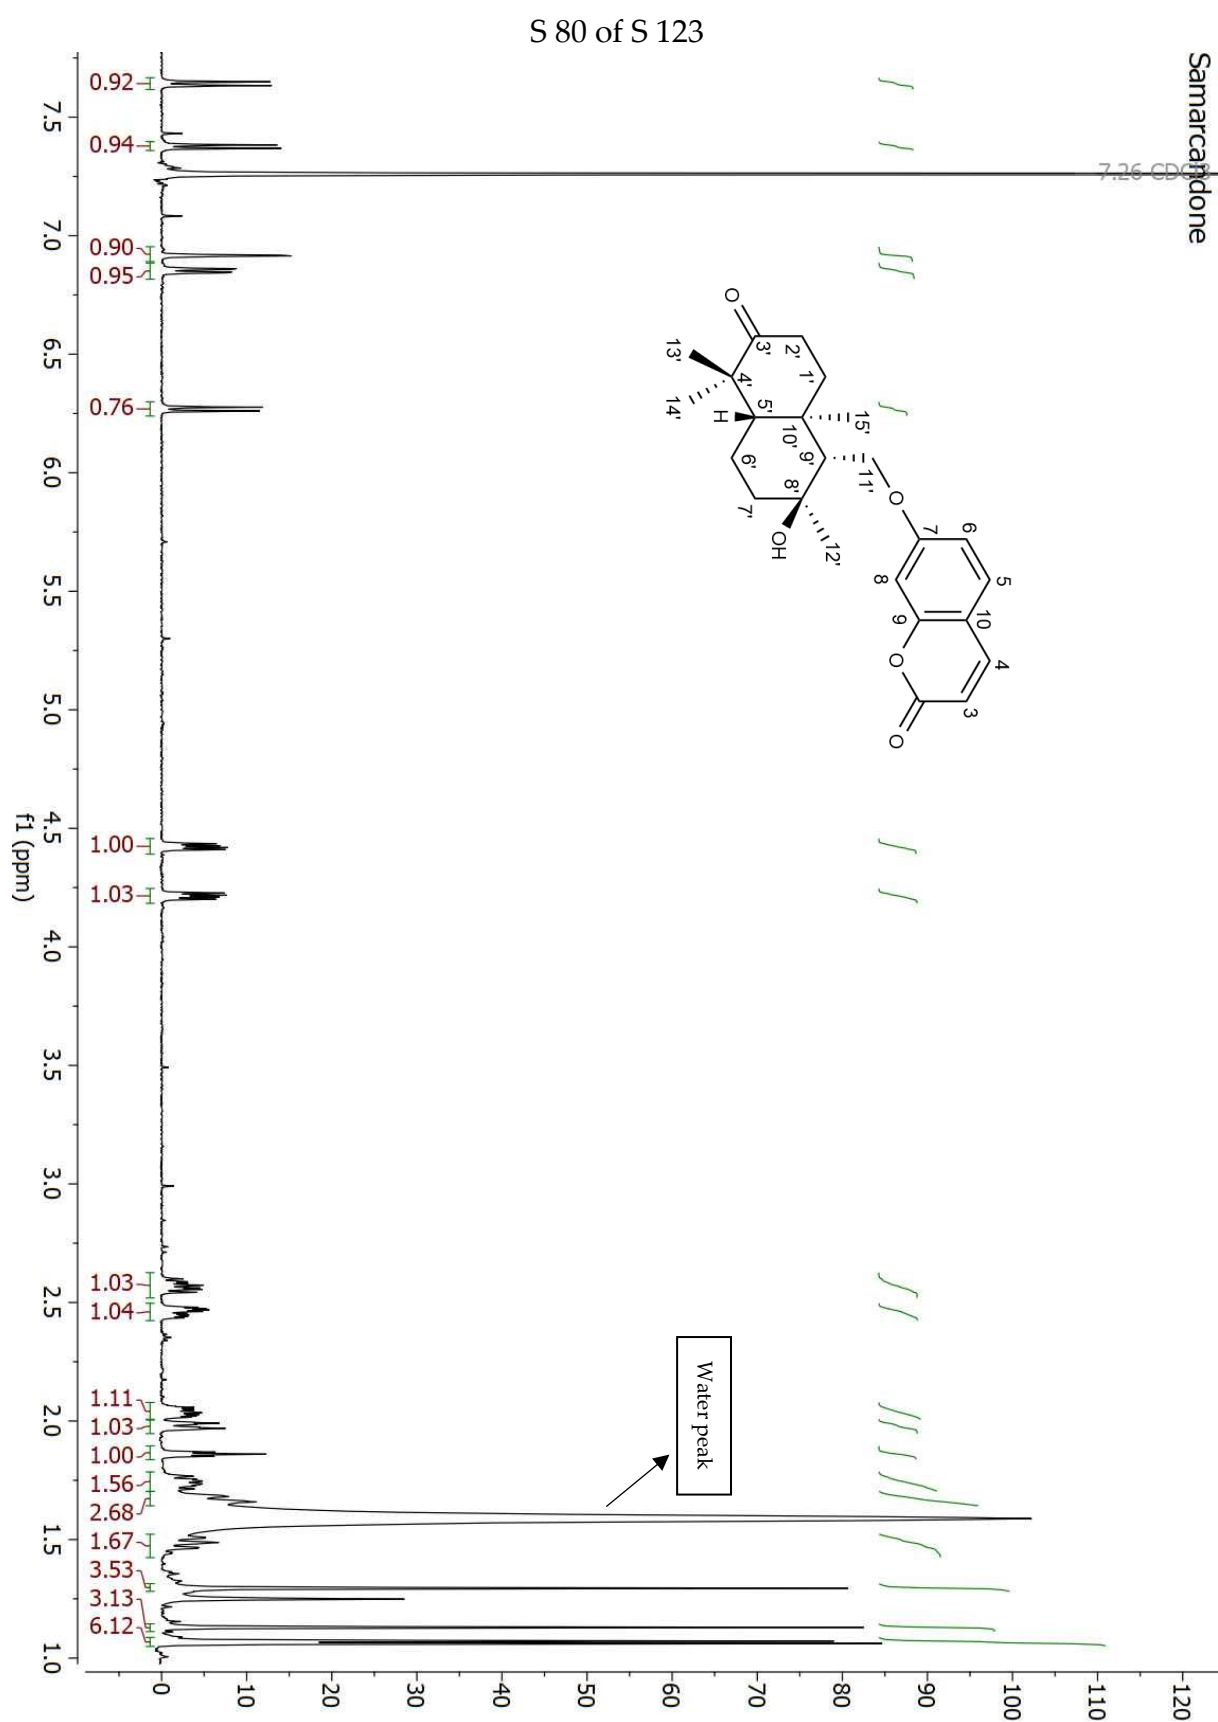

**Figure S74.**  $^1\text{H}$ -NMR spectrum (500 MHz,  $\text{CDCl}_3$ ) of samarcandone (13)

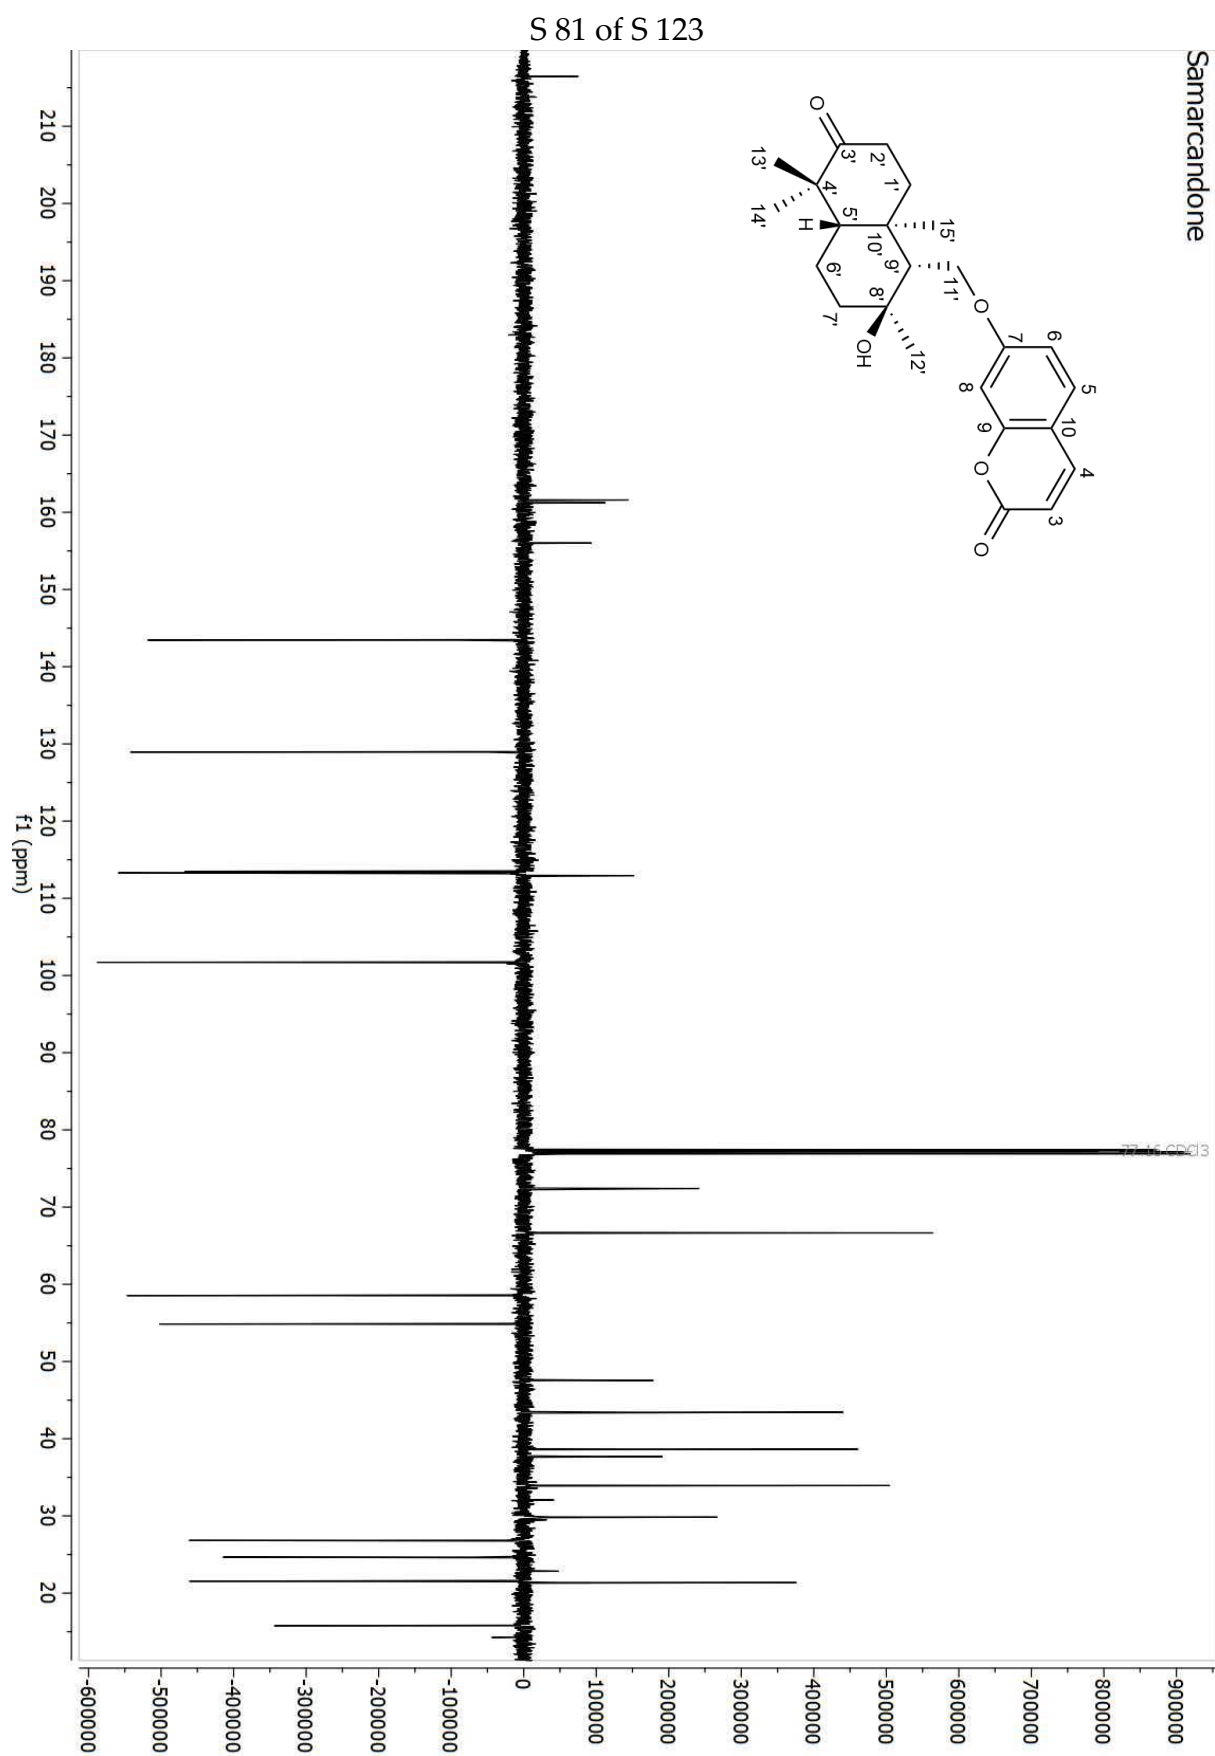

**Figure S75.**  $^{13}\text{C}$ -NMR (APT) spectrum (125 MHz,  $\text{CDCl}_3$ ) of samarcondone (13)

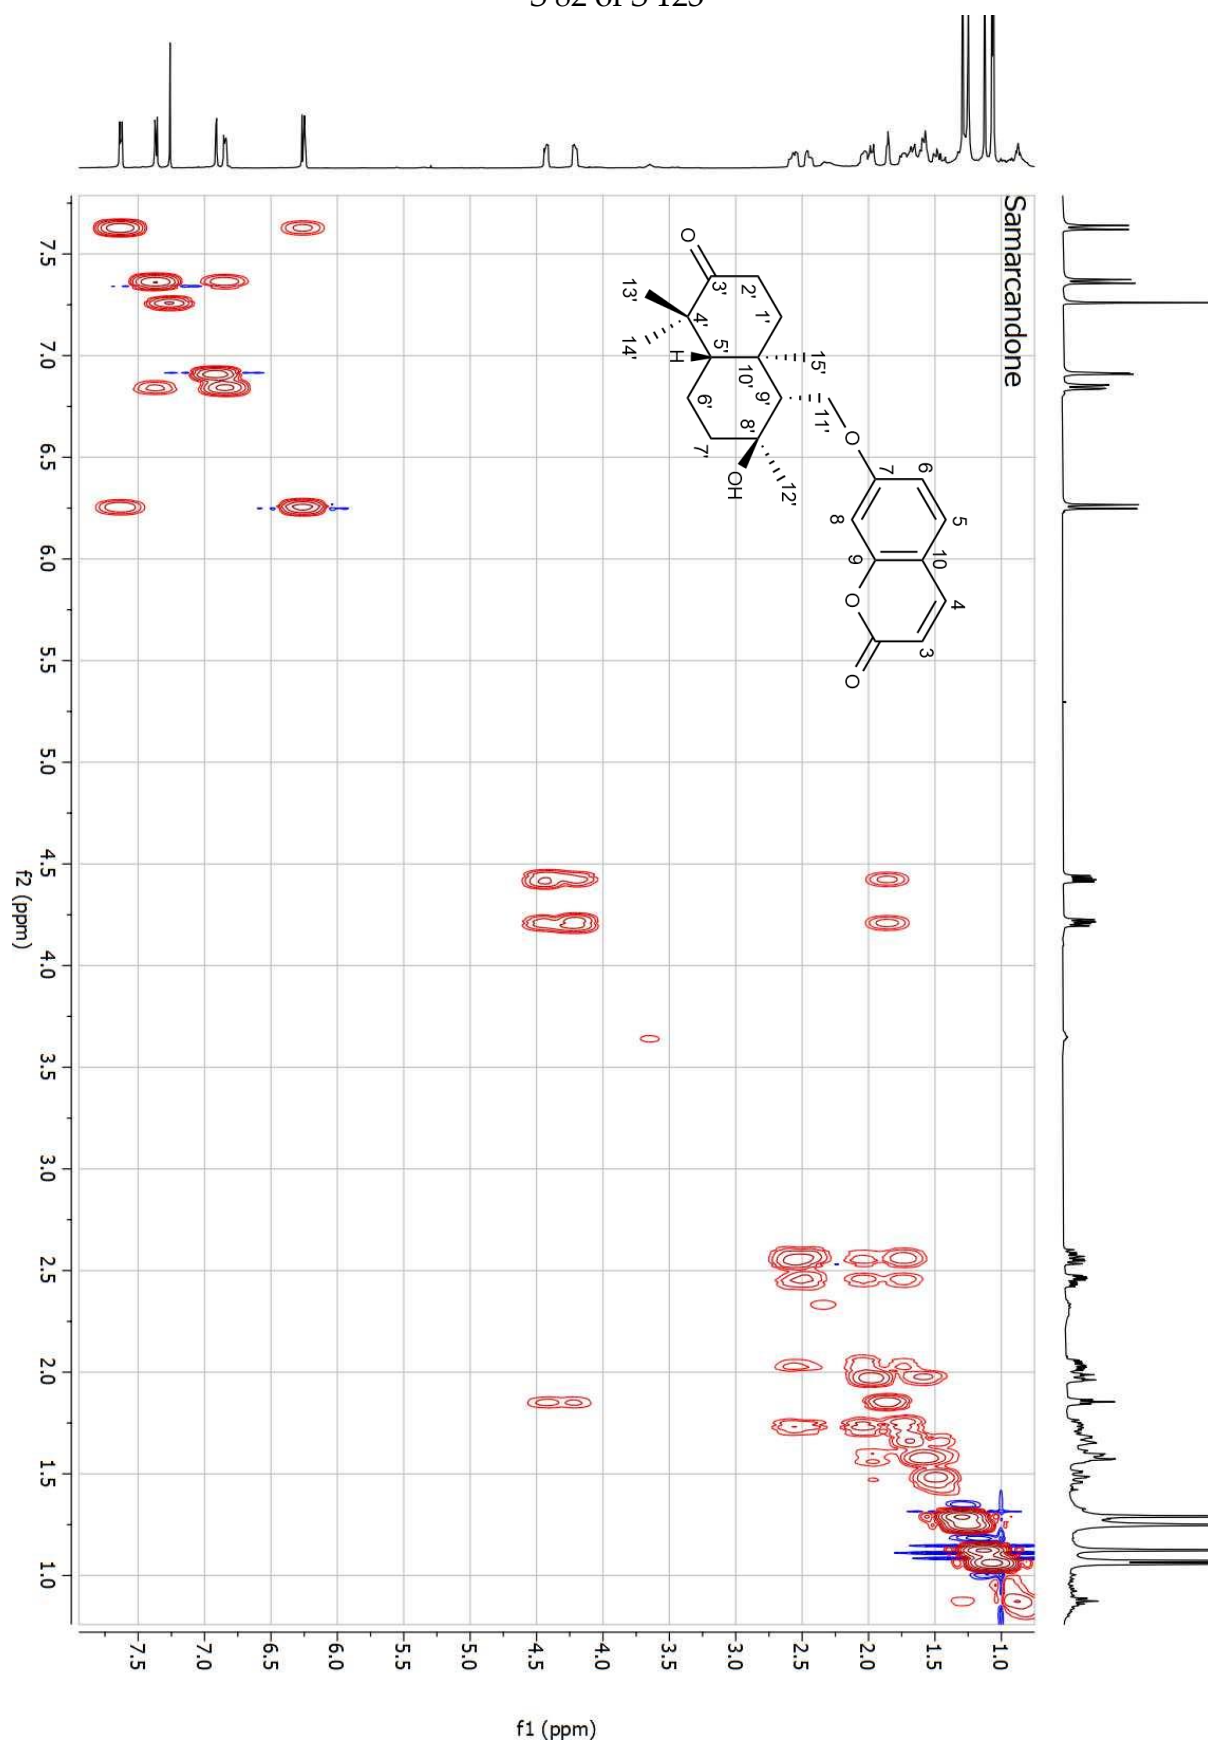

**Figure S76.** <sup>1</sup>H-<sup>1</sup>H COSY spectrum (CDCl<sub>3</sub>) of samarcondone (13)

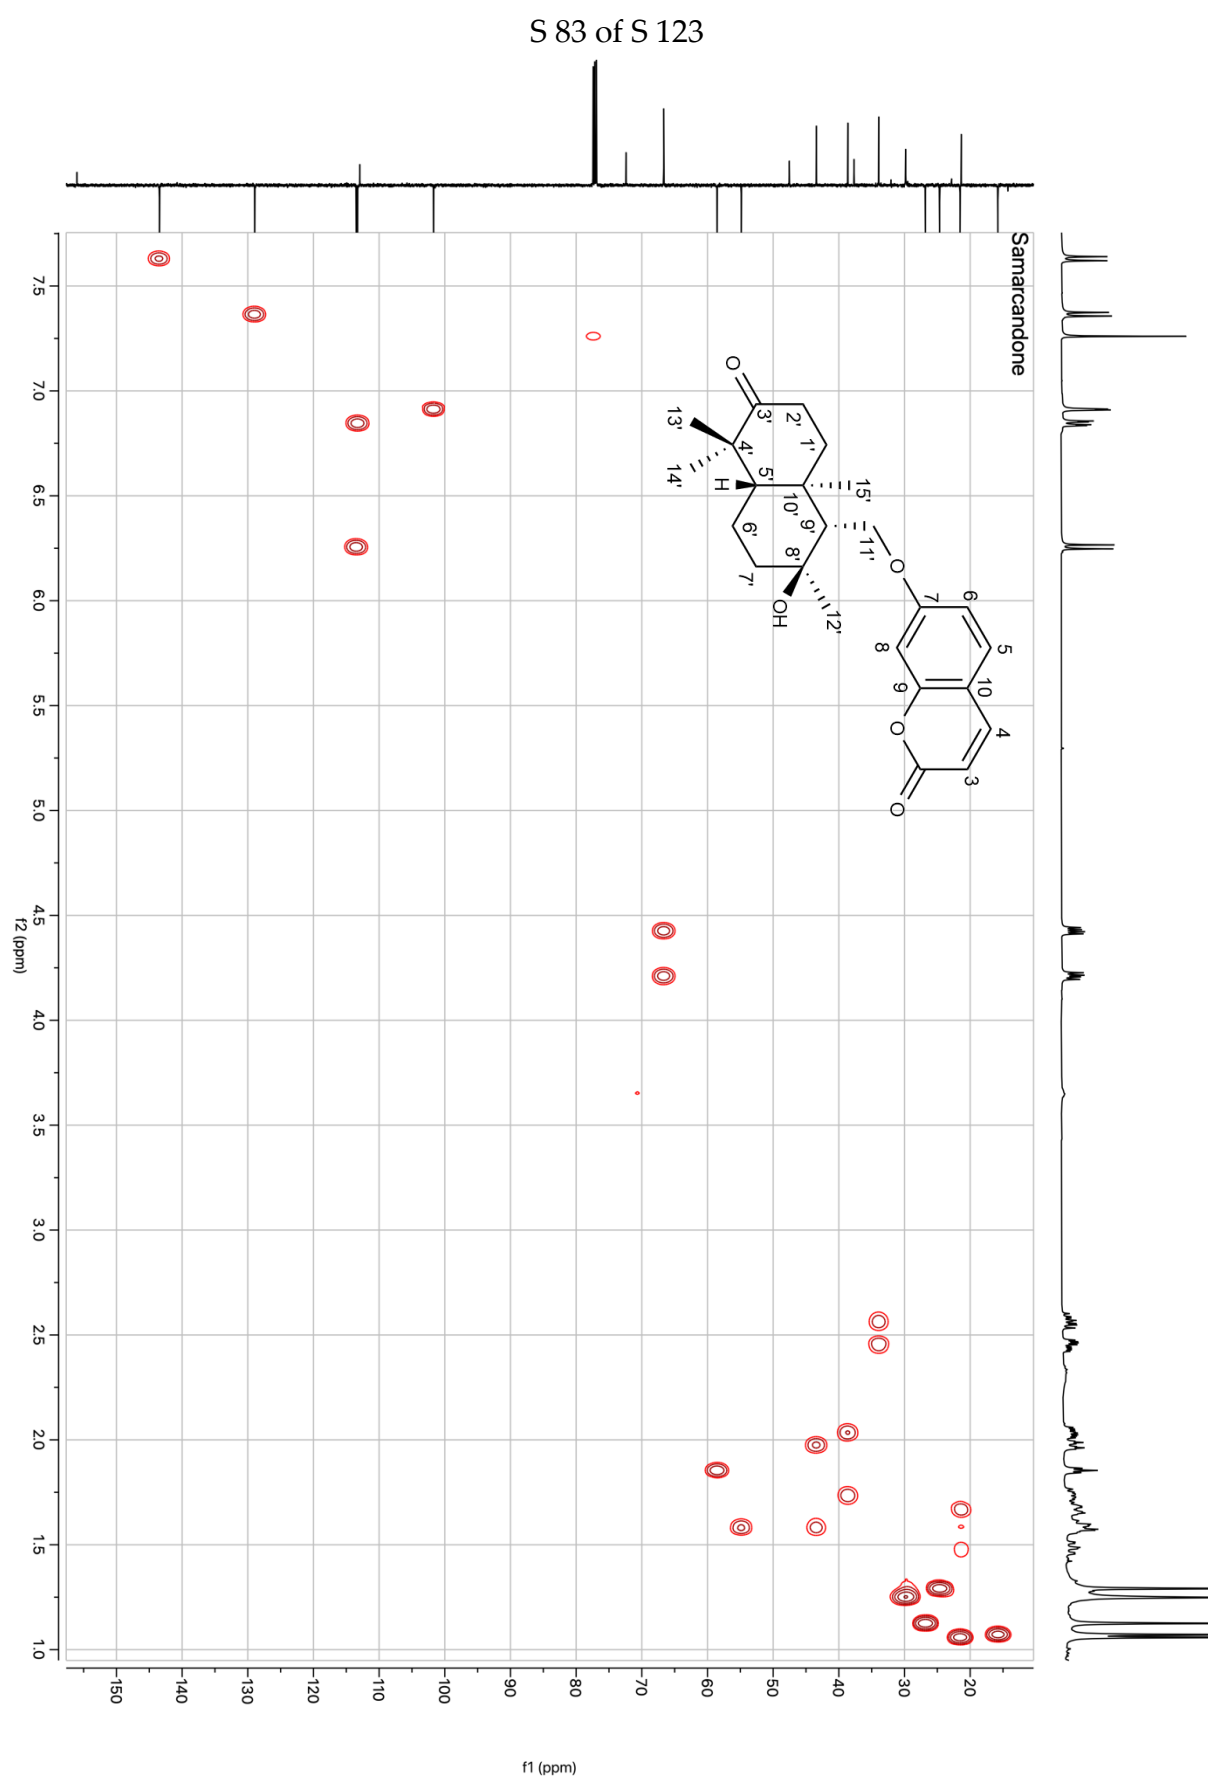

**Figure S77.** HSQC spectrum (CDCl<sub>3</sub>) of samarcandone (13)

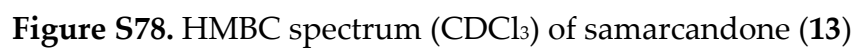



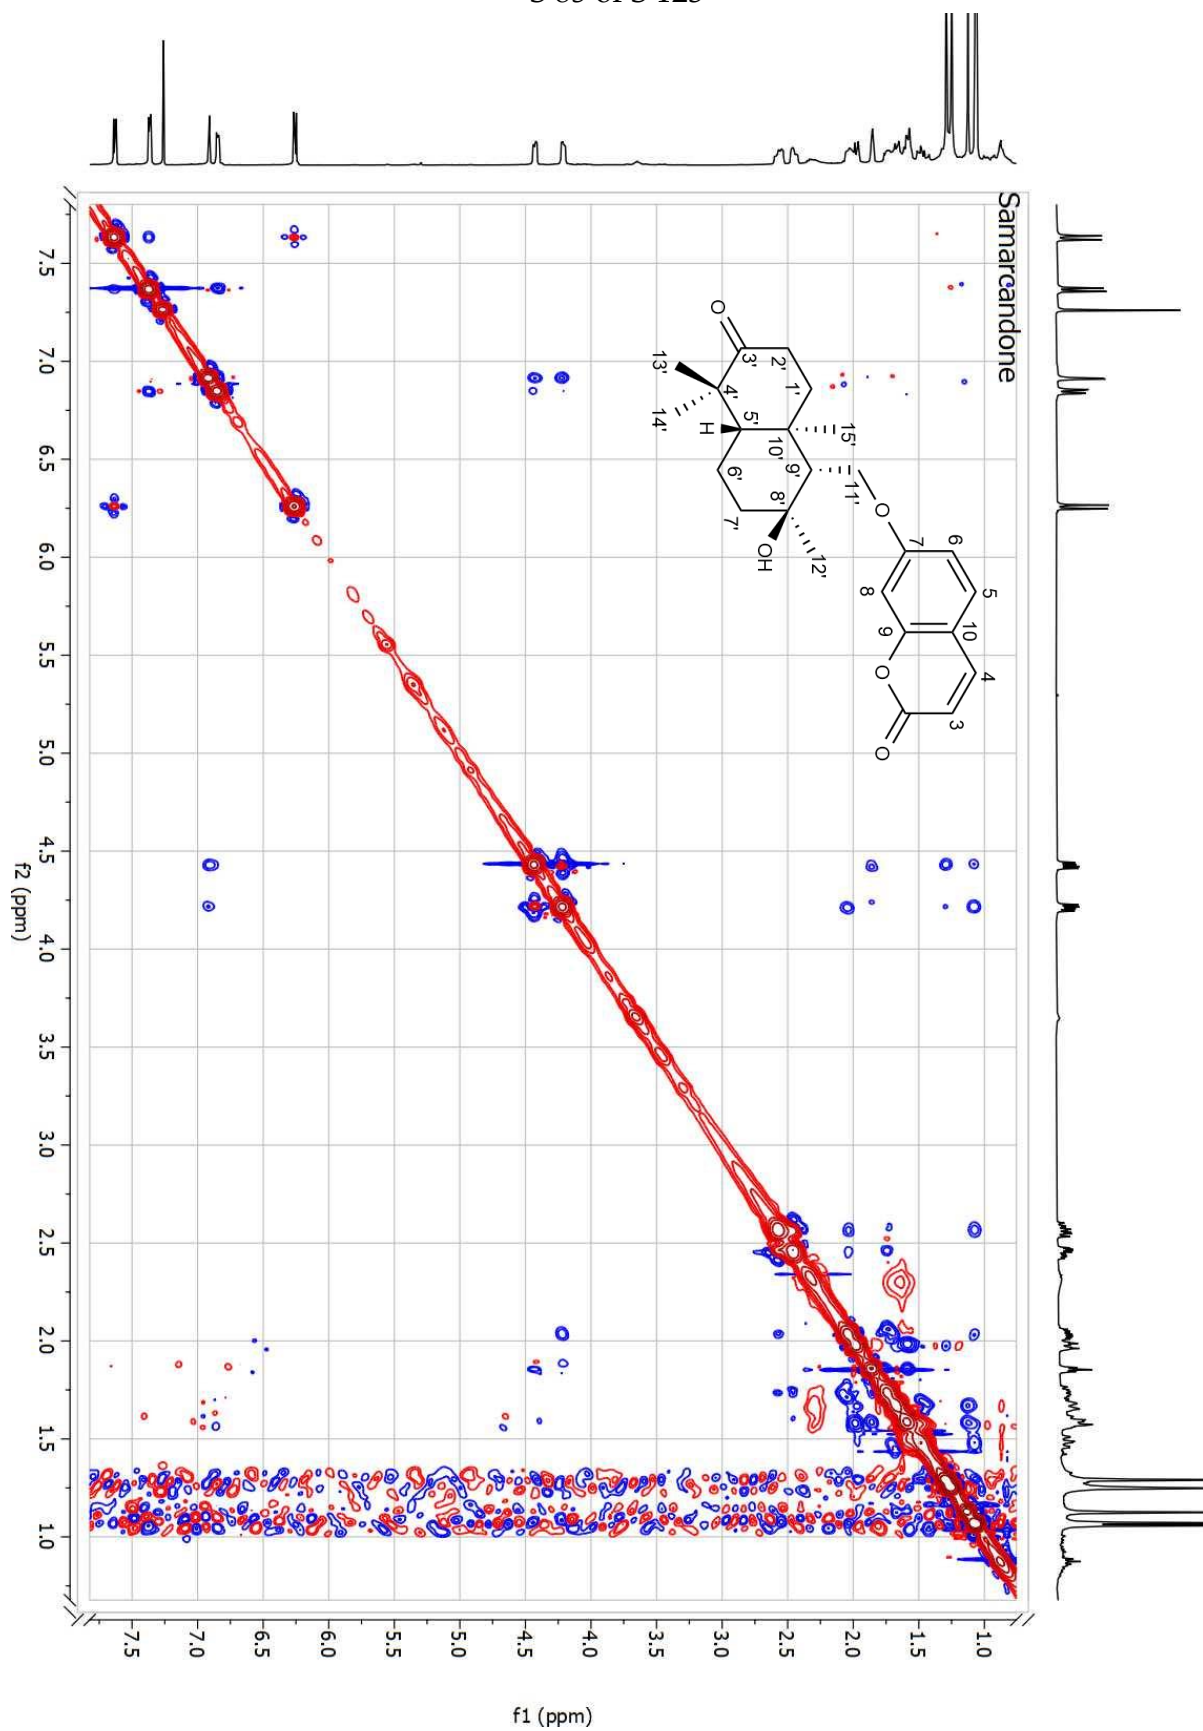

**Figure S79.** NOESY spectrum (CDCl<sub>3</sub>) of samarcandone (13)

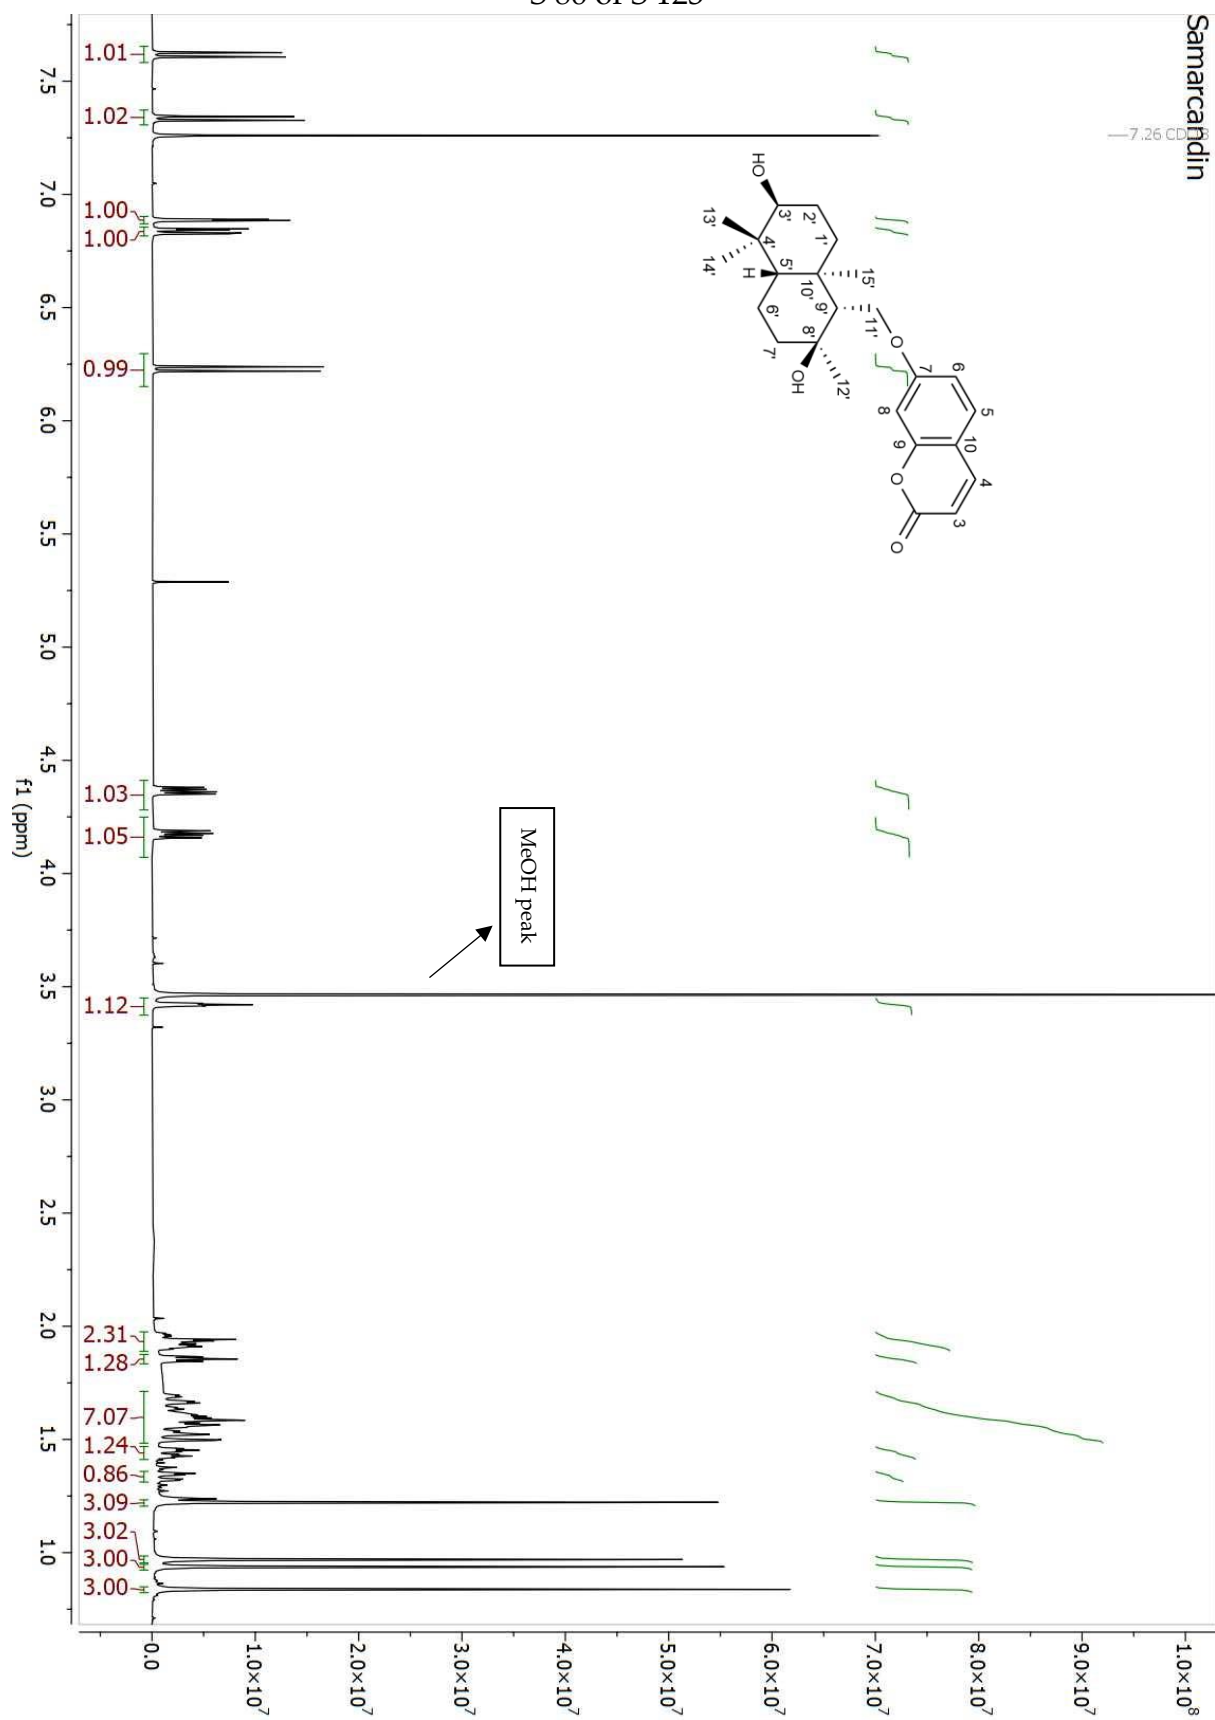**Figure S80.** <sup>1</sup>H-NMR spectrum (500 MHz, CDCl<sub>3</sub>) of samarcandin (14)

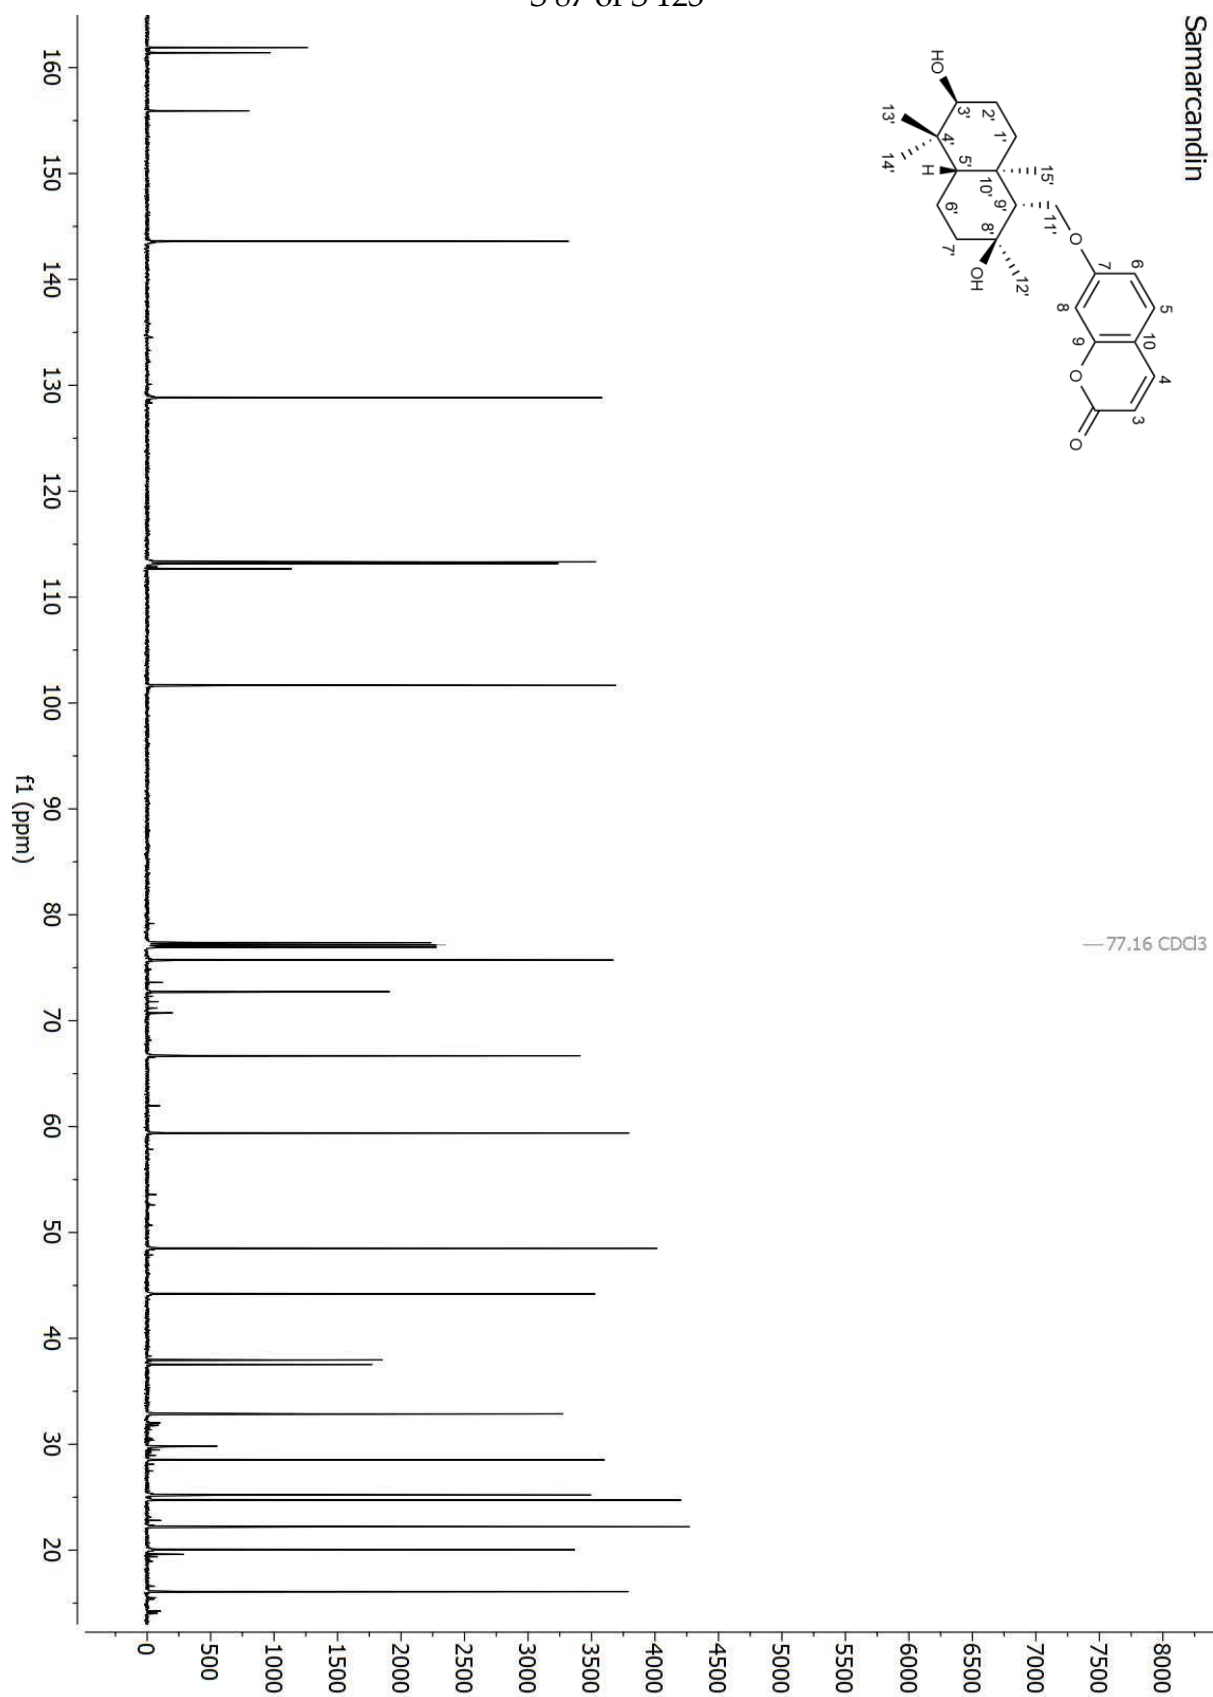

**Figure S81.**  $^{13}\text{C}$ -NMR spectrum (125 MHz,  $\text{CDCl}_3$ ) of samarcandin (14)

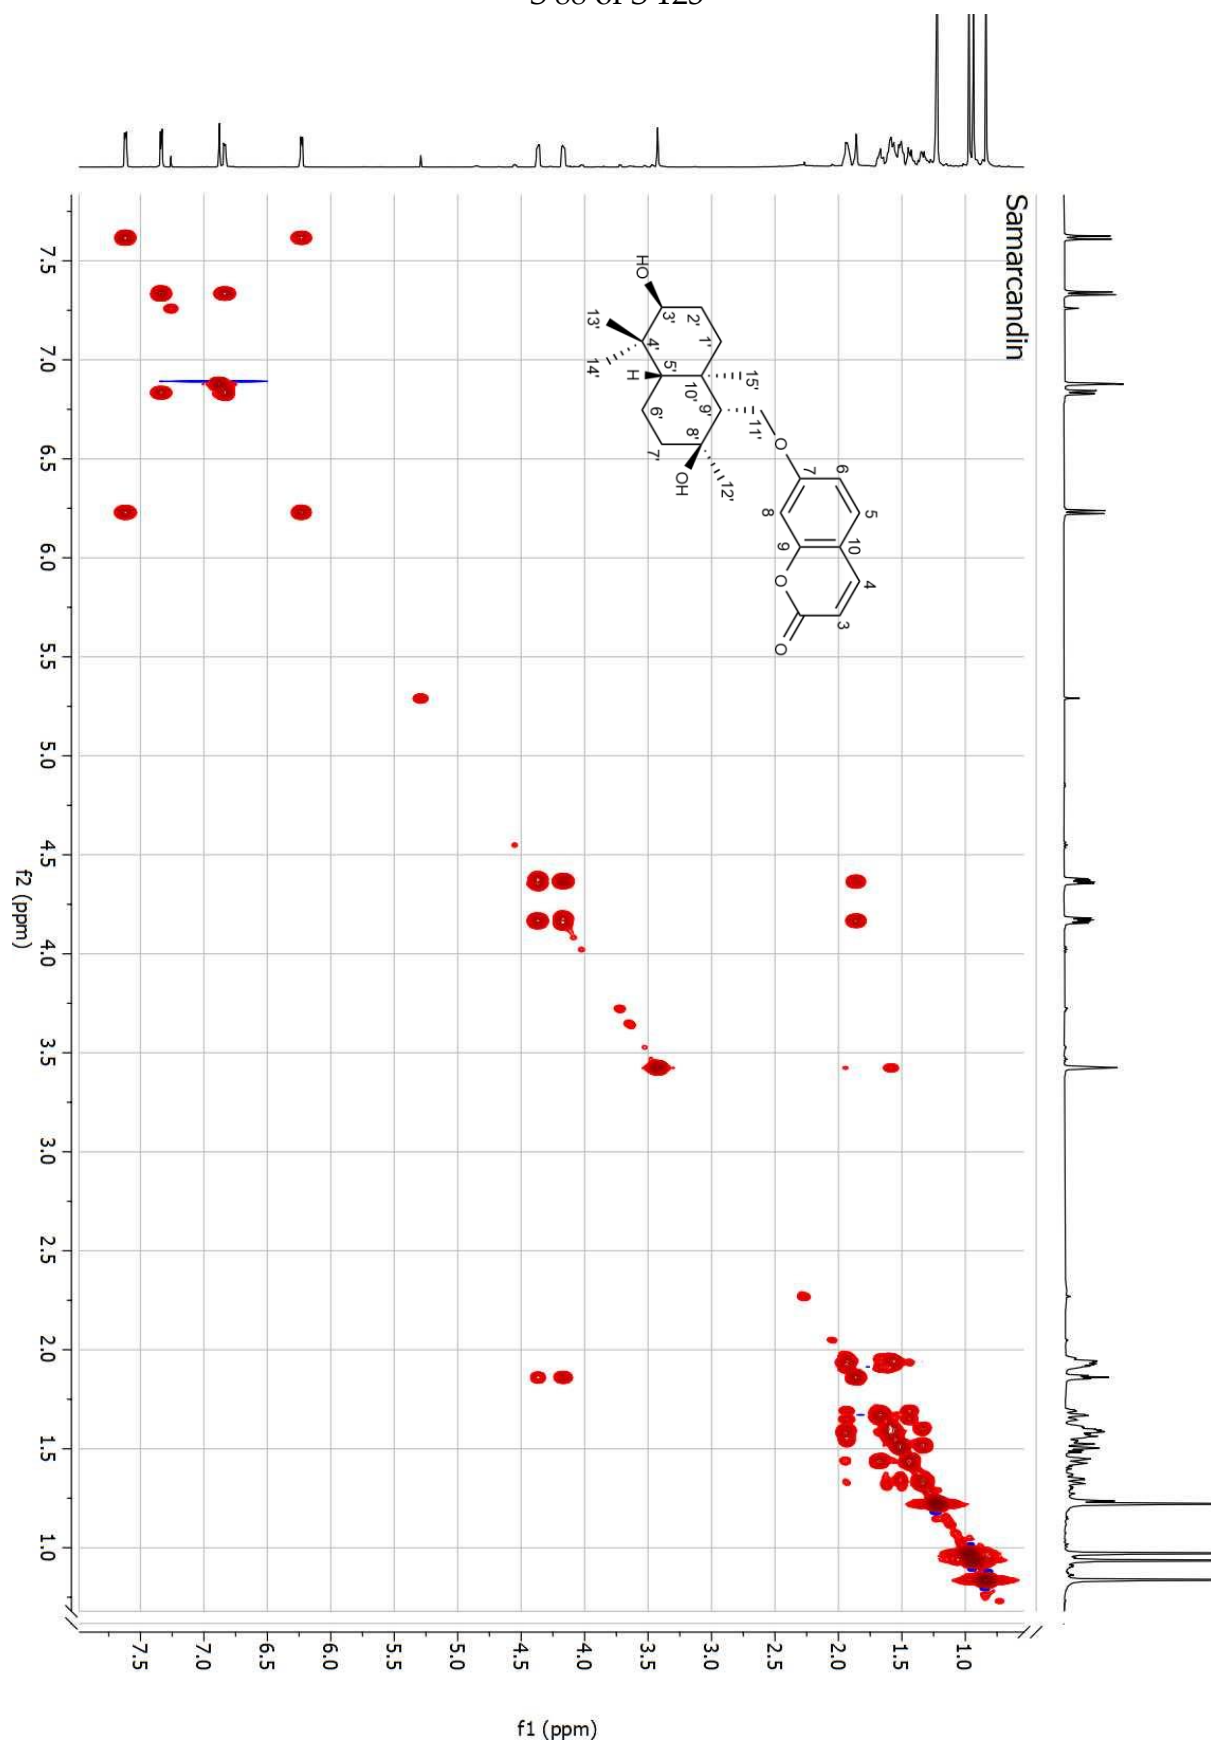

S 89 of S 123

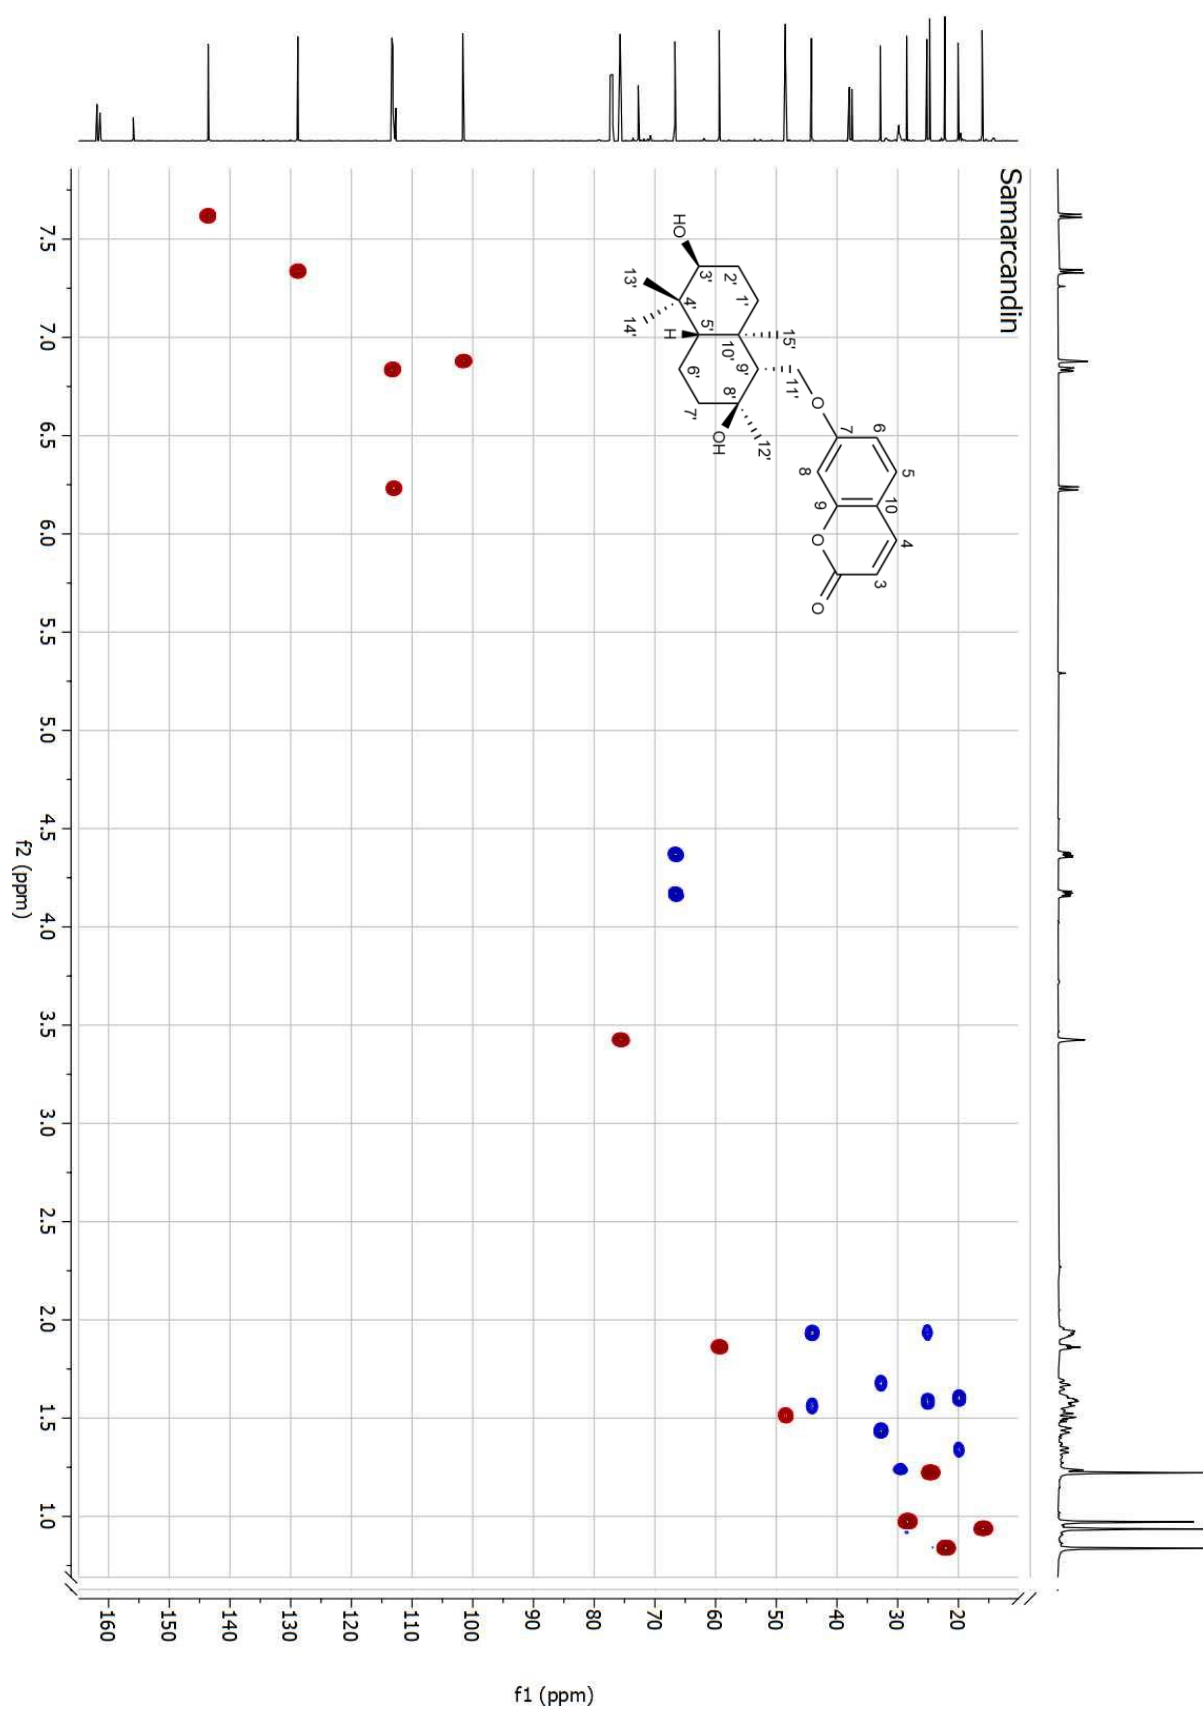**Figure S83.** HSQC spectrum ( $\text{CDCl}_3$ ) of samarcandin (14)

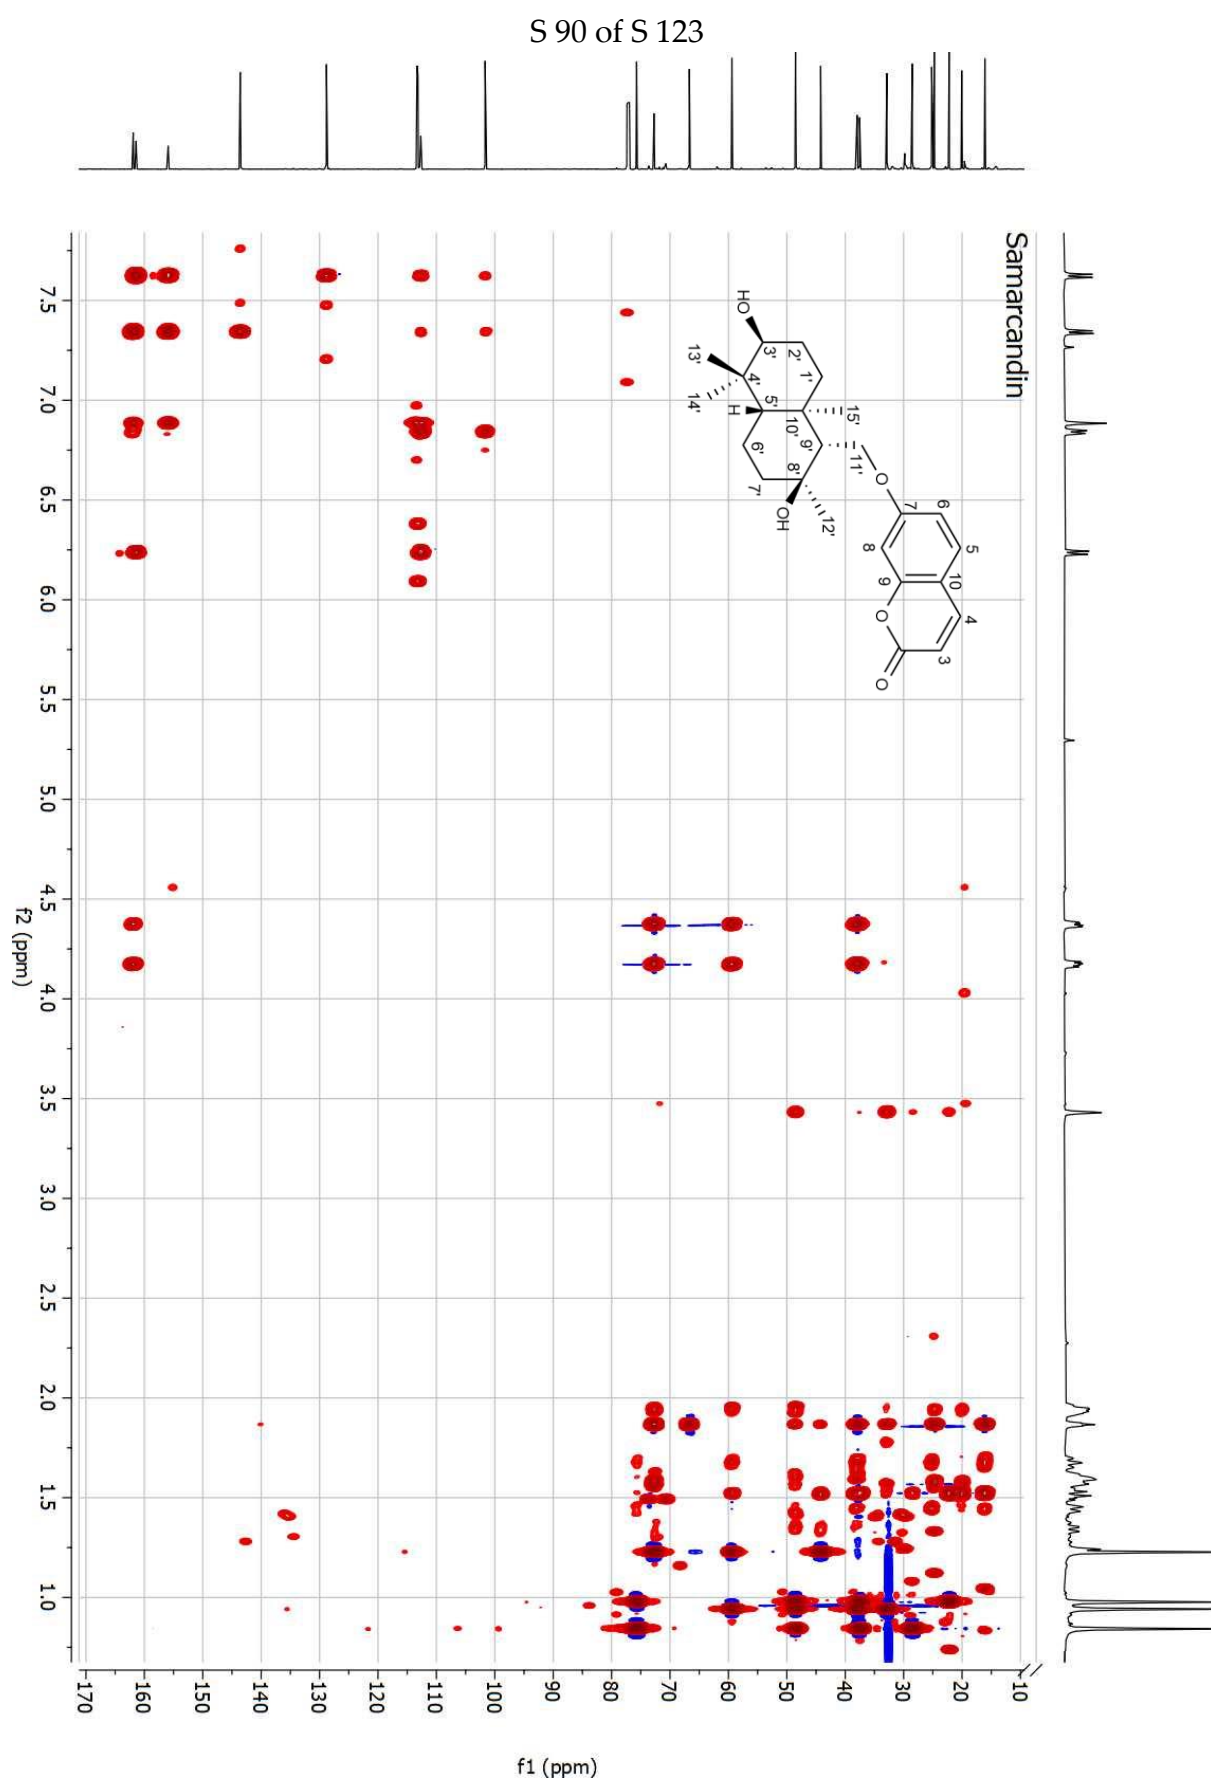

**Figure S84.** HMBC spectrum (CDCl<sub>3</sub>) of samarcandin (14)

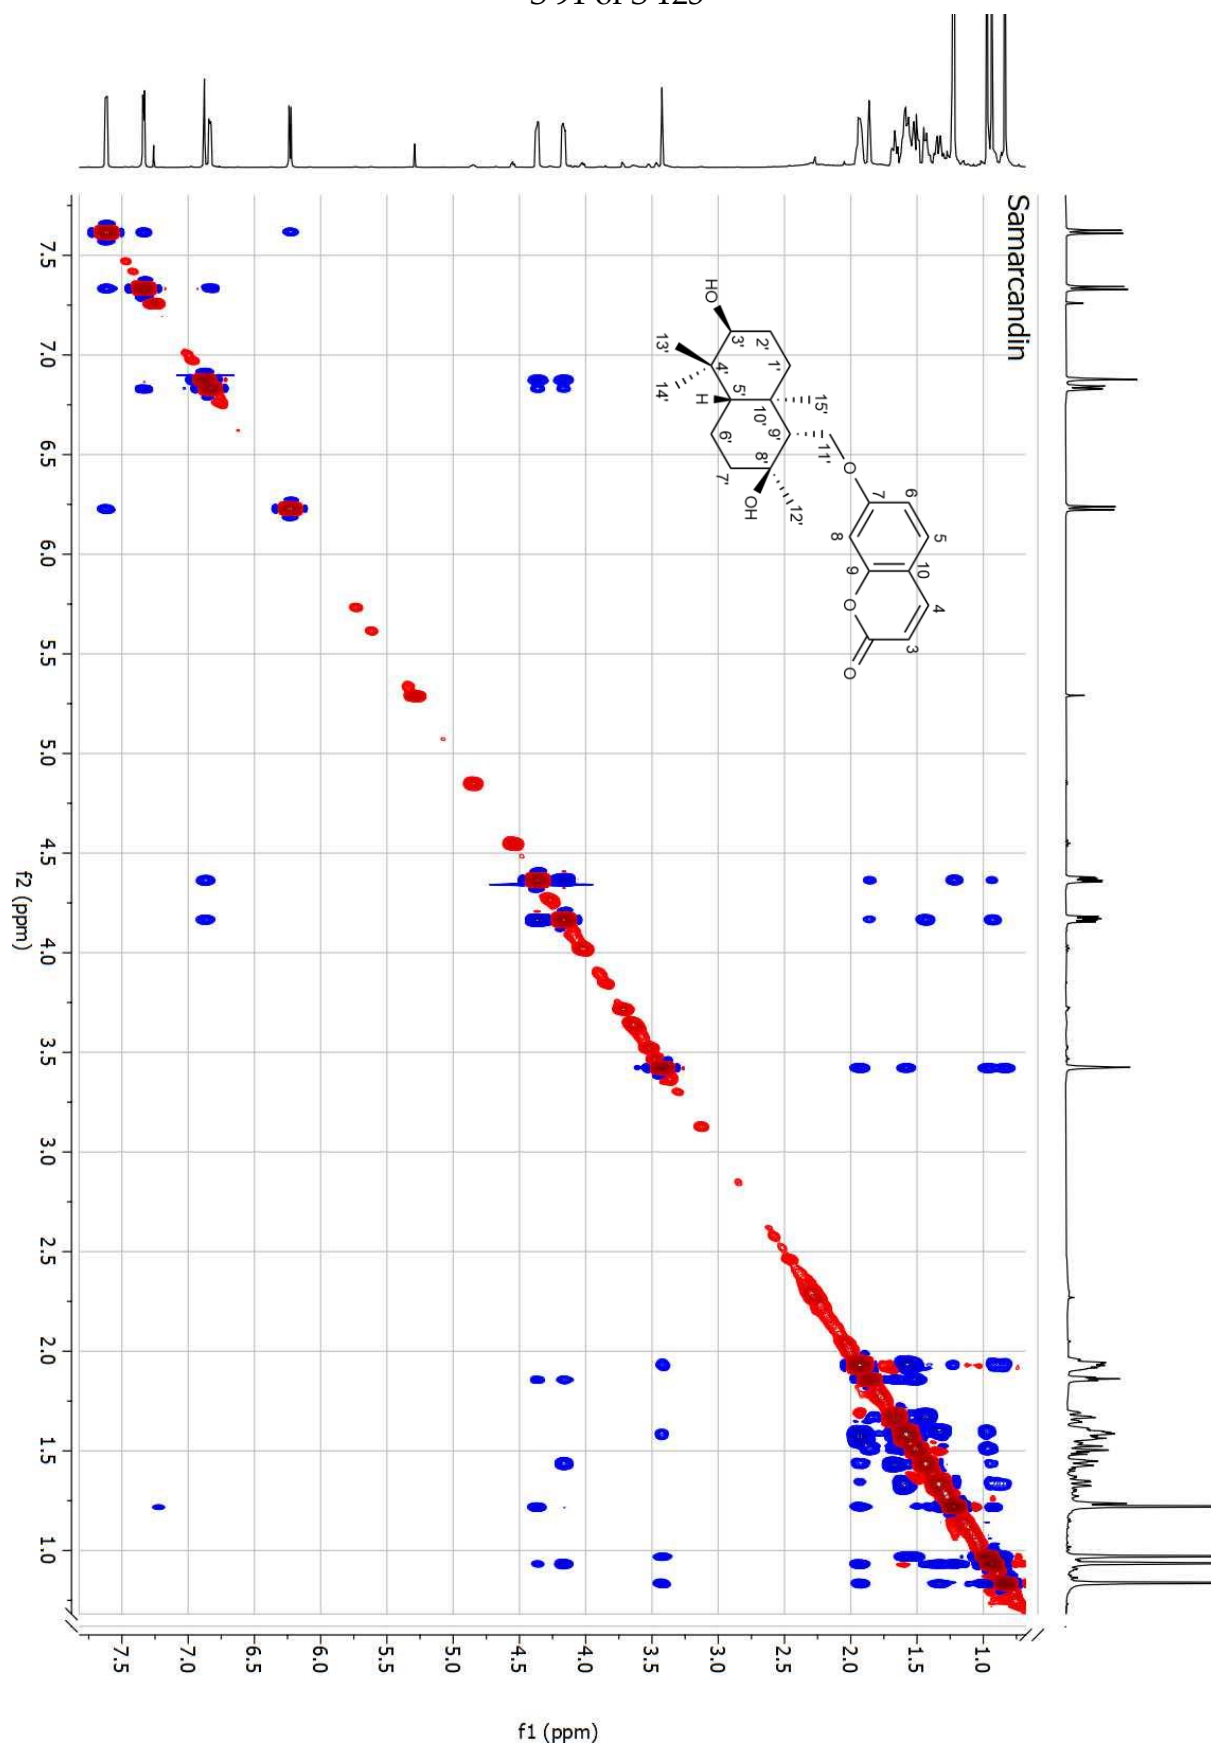

**Figure S85.** NOESY spectrum (CDCl<sub>3</sub>) of samarcandin (14)

S 92 of S 123

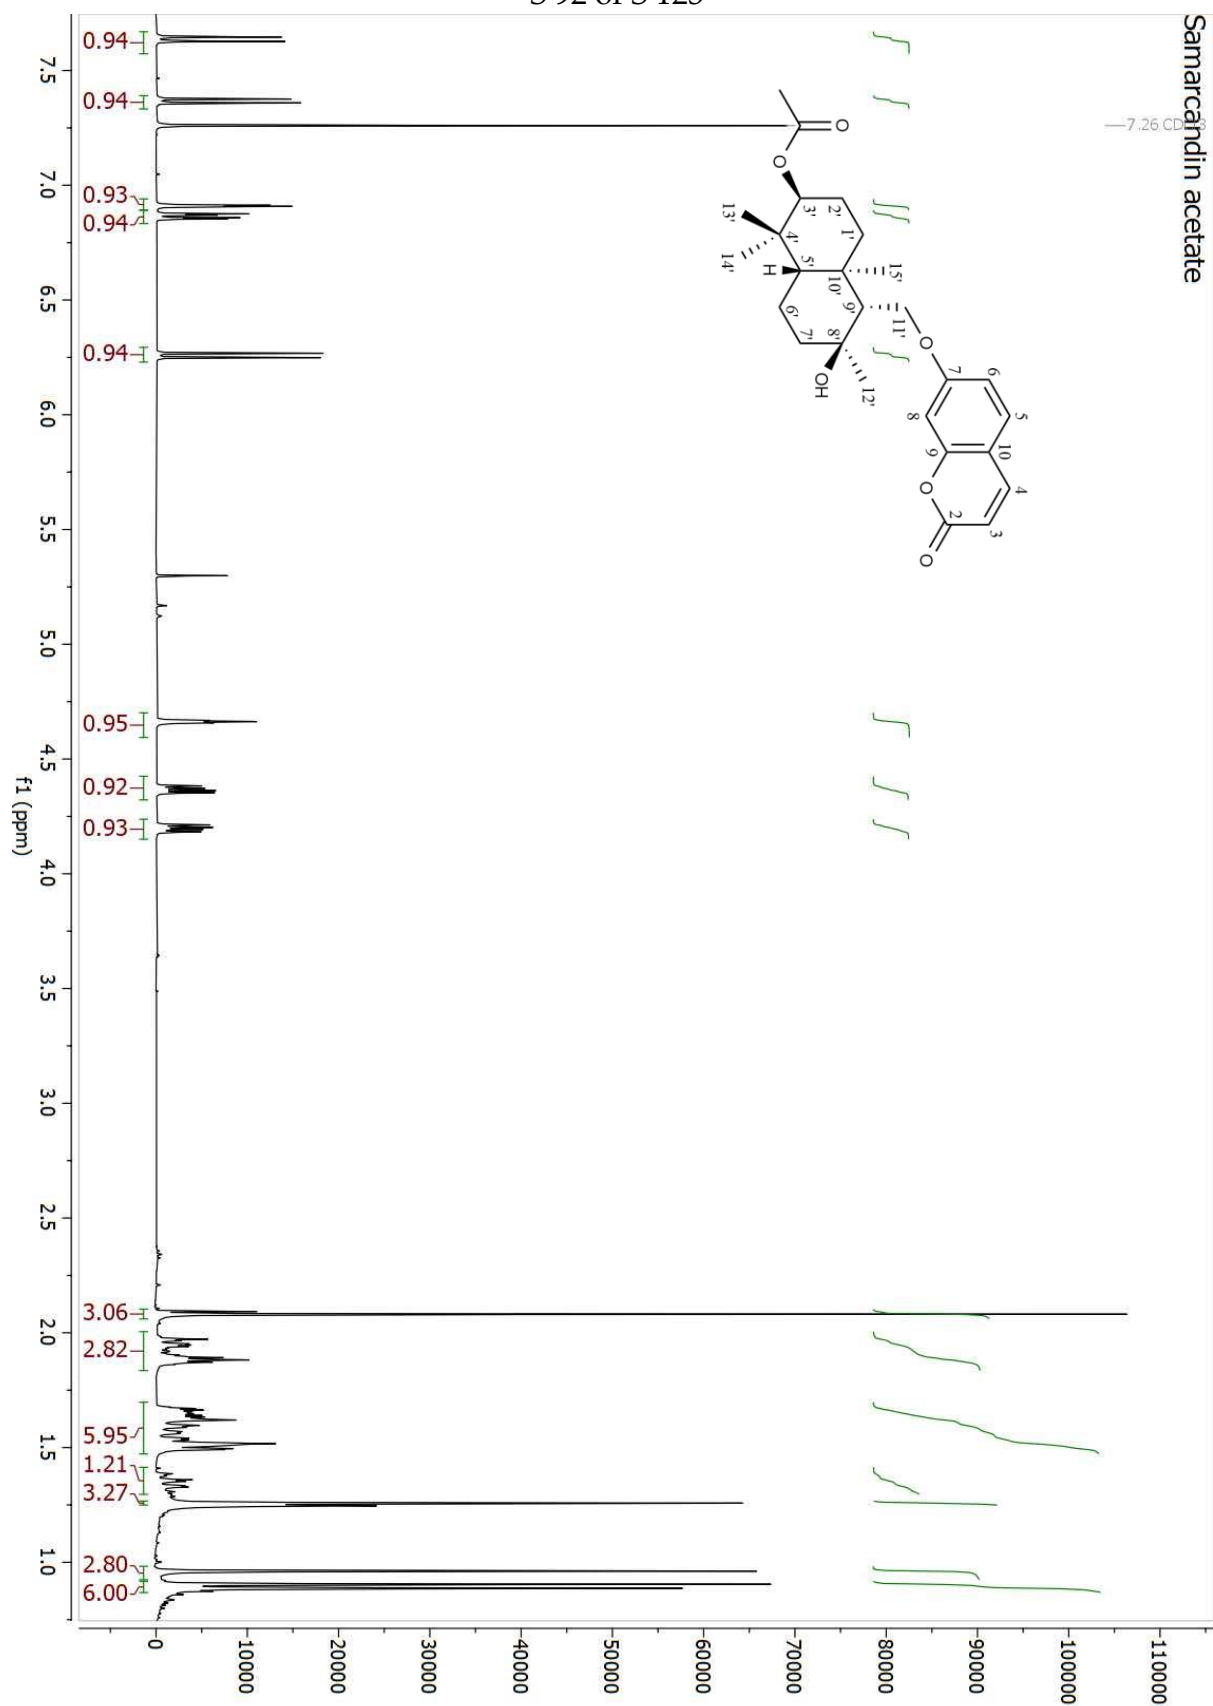**Figure S86.**  $^1\text{H}$ -NMR spectrum (500 MHz,  $\text{CDCl}_3$ ) of samarcandin acetate (15)



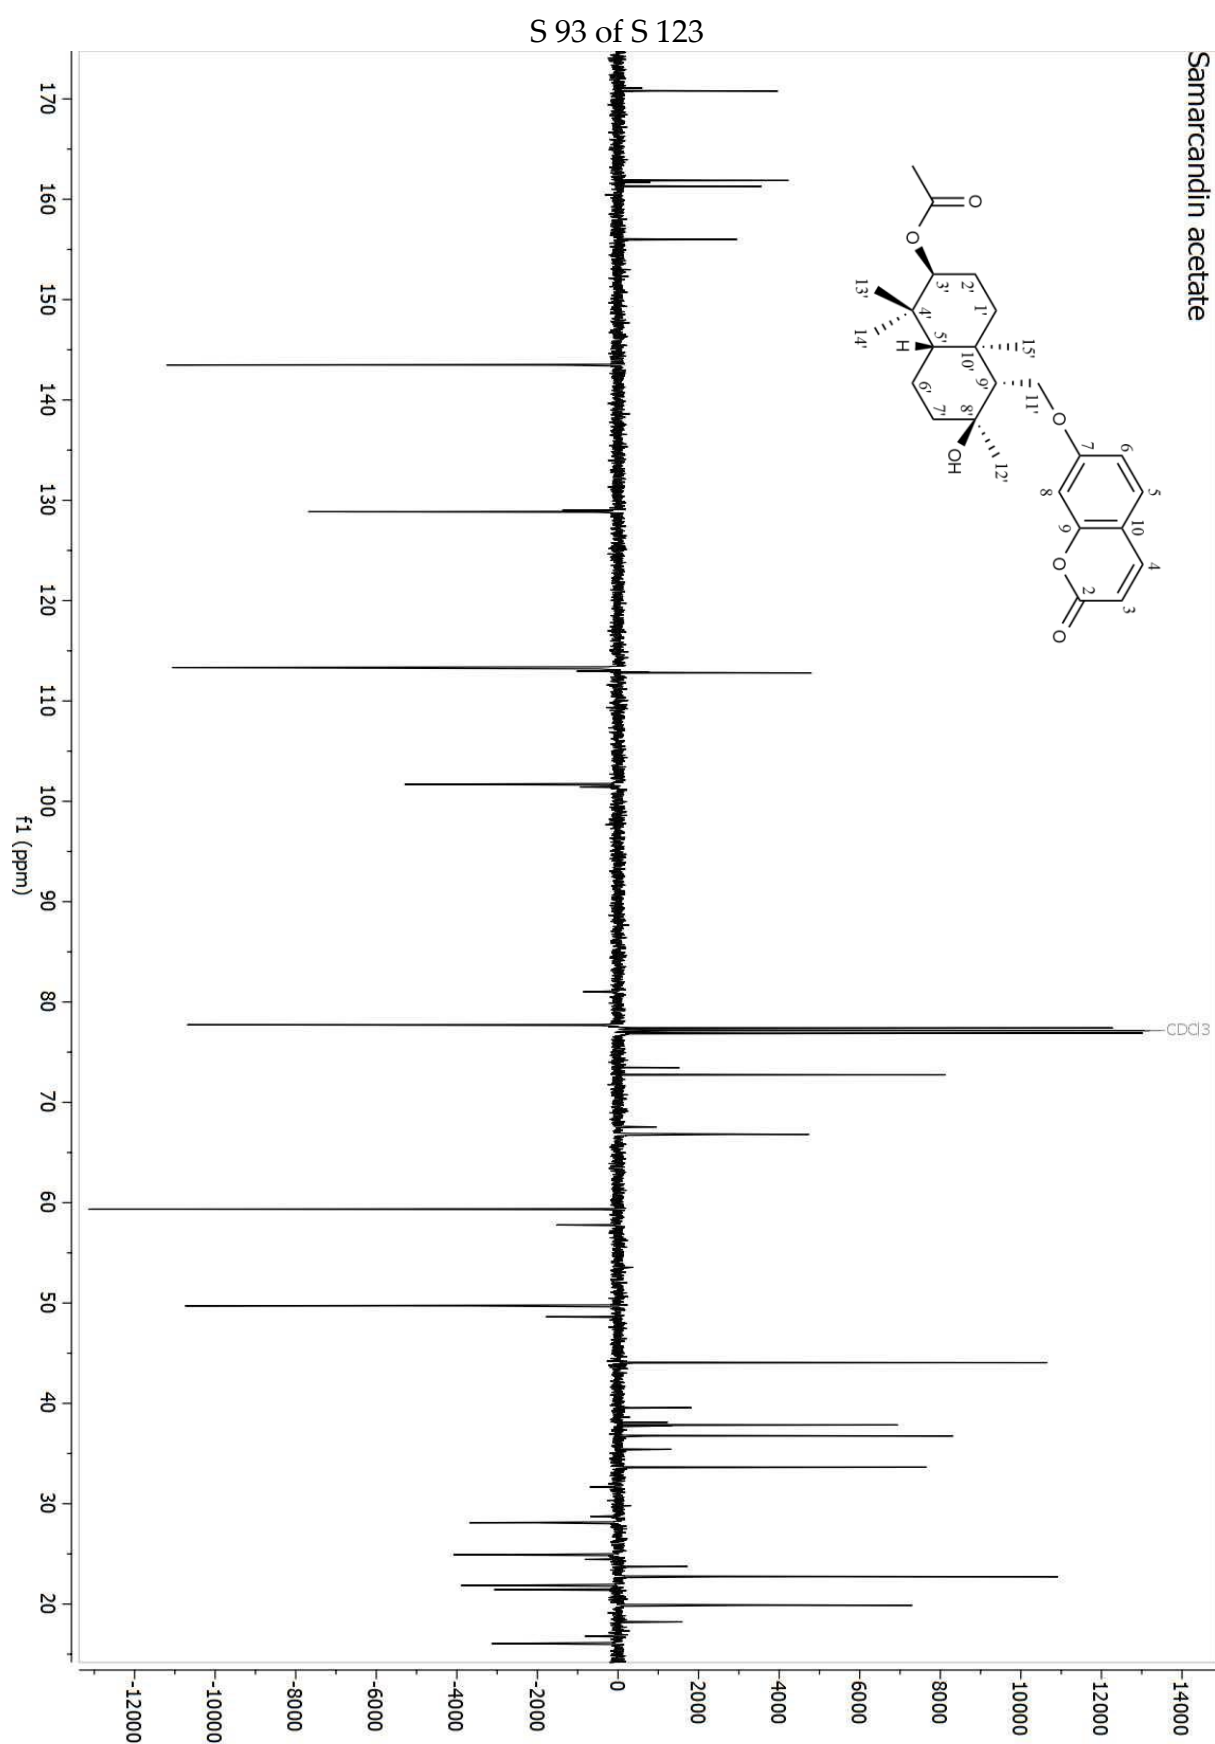

**Figure S87.** <sup>13</sup>C-NMR (APT) spectrum (125 MHz, CDCl<sub>3</sub>) of samarcandin acetate (15)

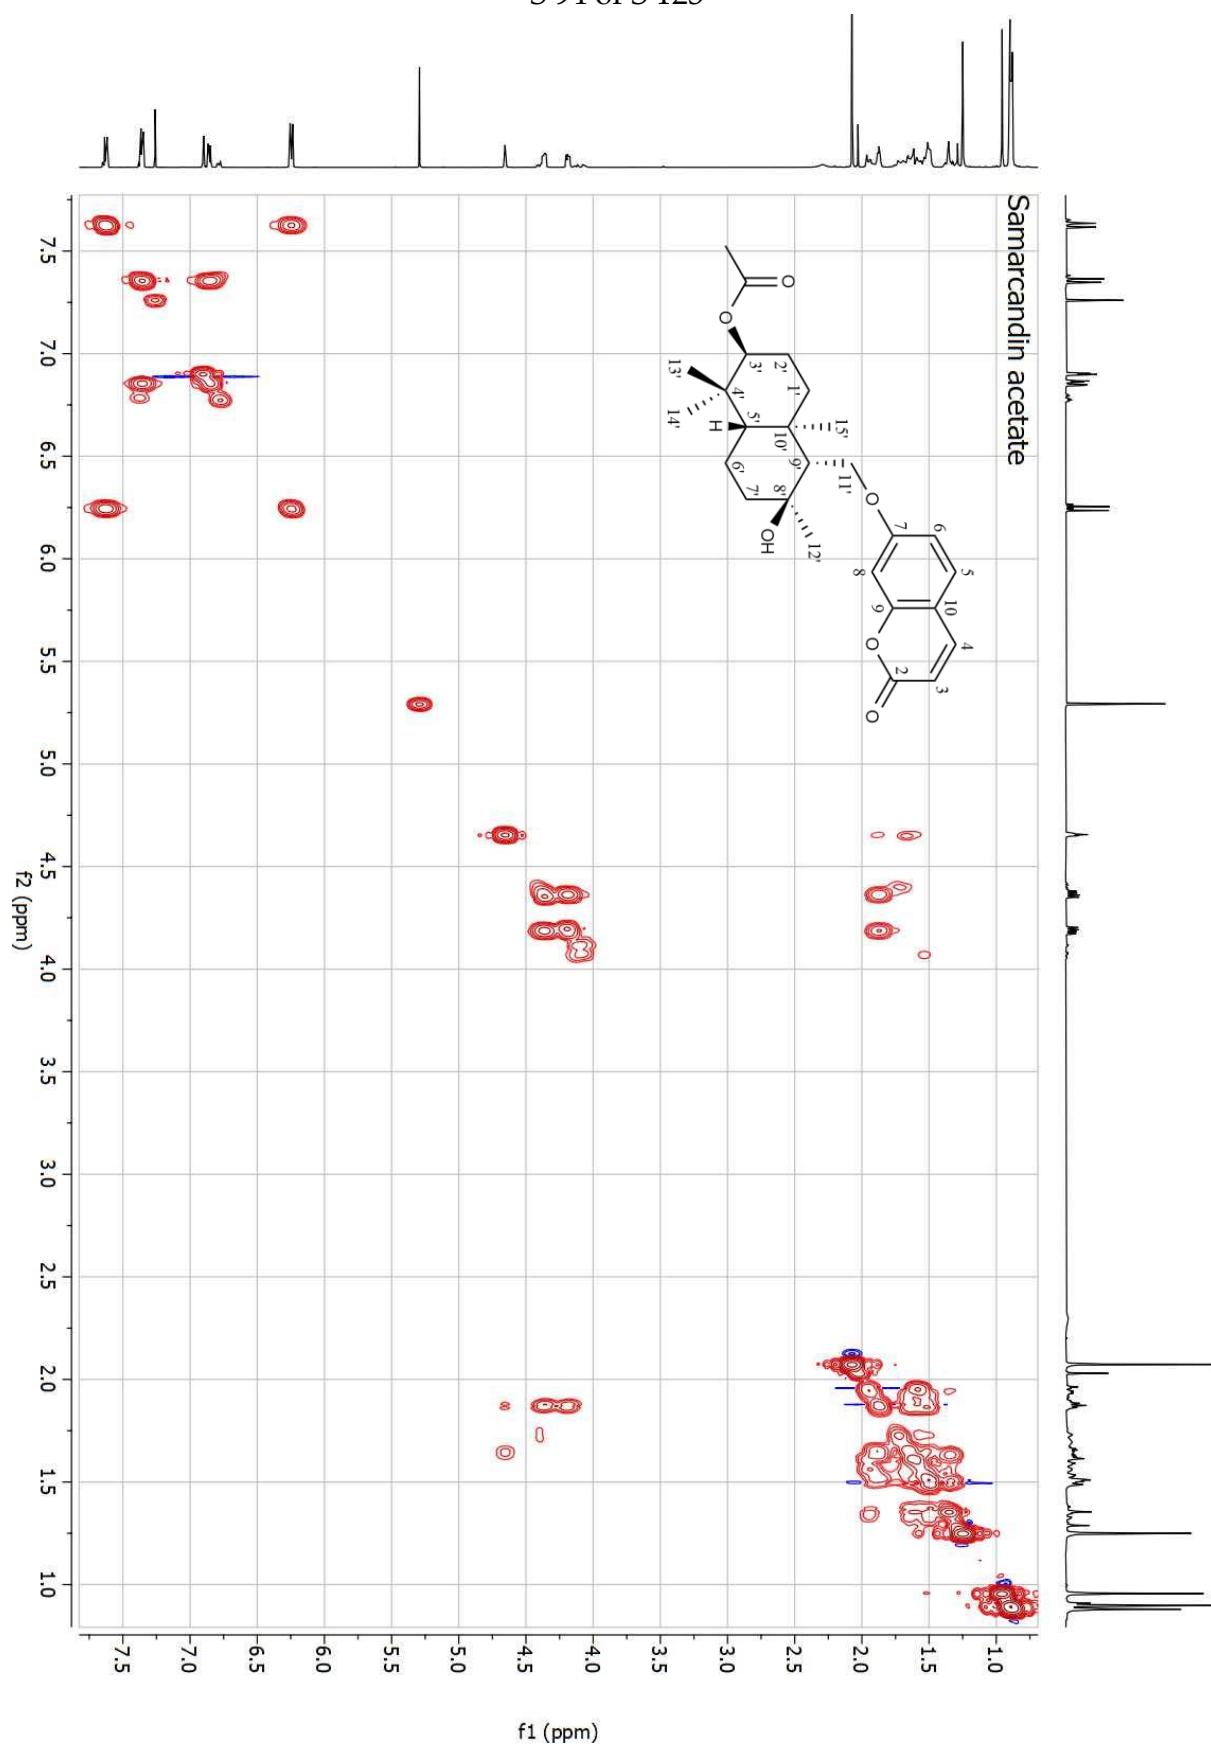

**Figure S88.**  $^1\text{H}$ - $^1\text{H}$  COSY spectrum (CDCl<sub>3</sub>) of samarcandin acetate (**15**)

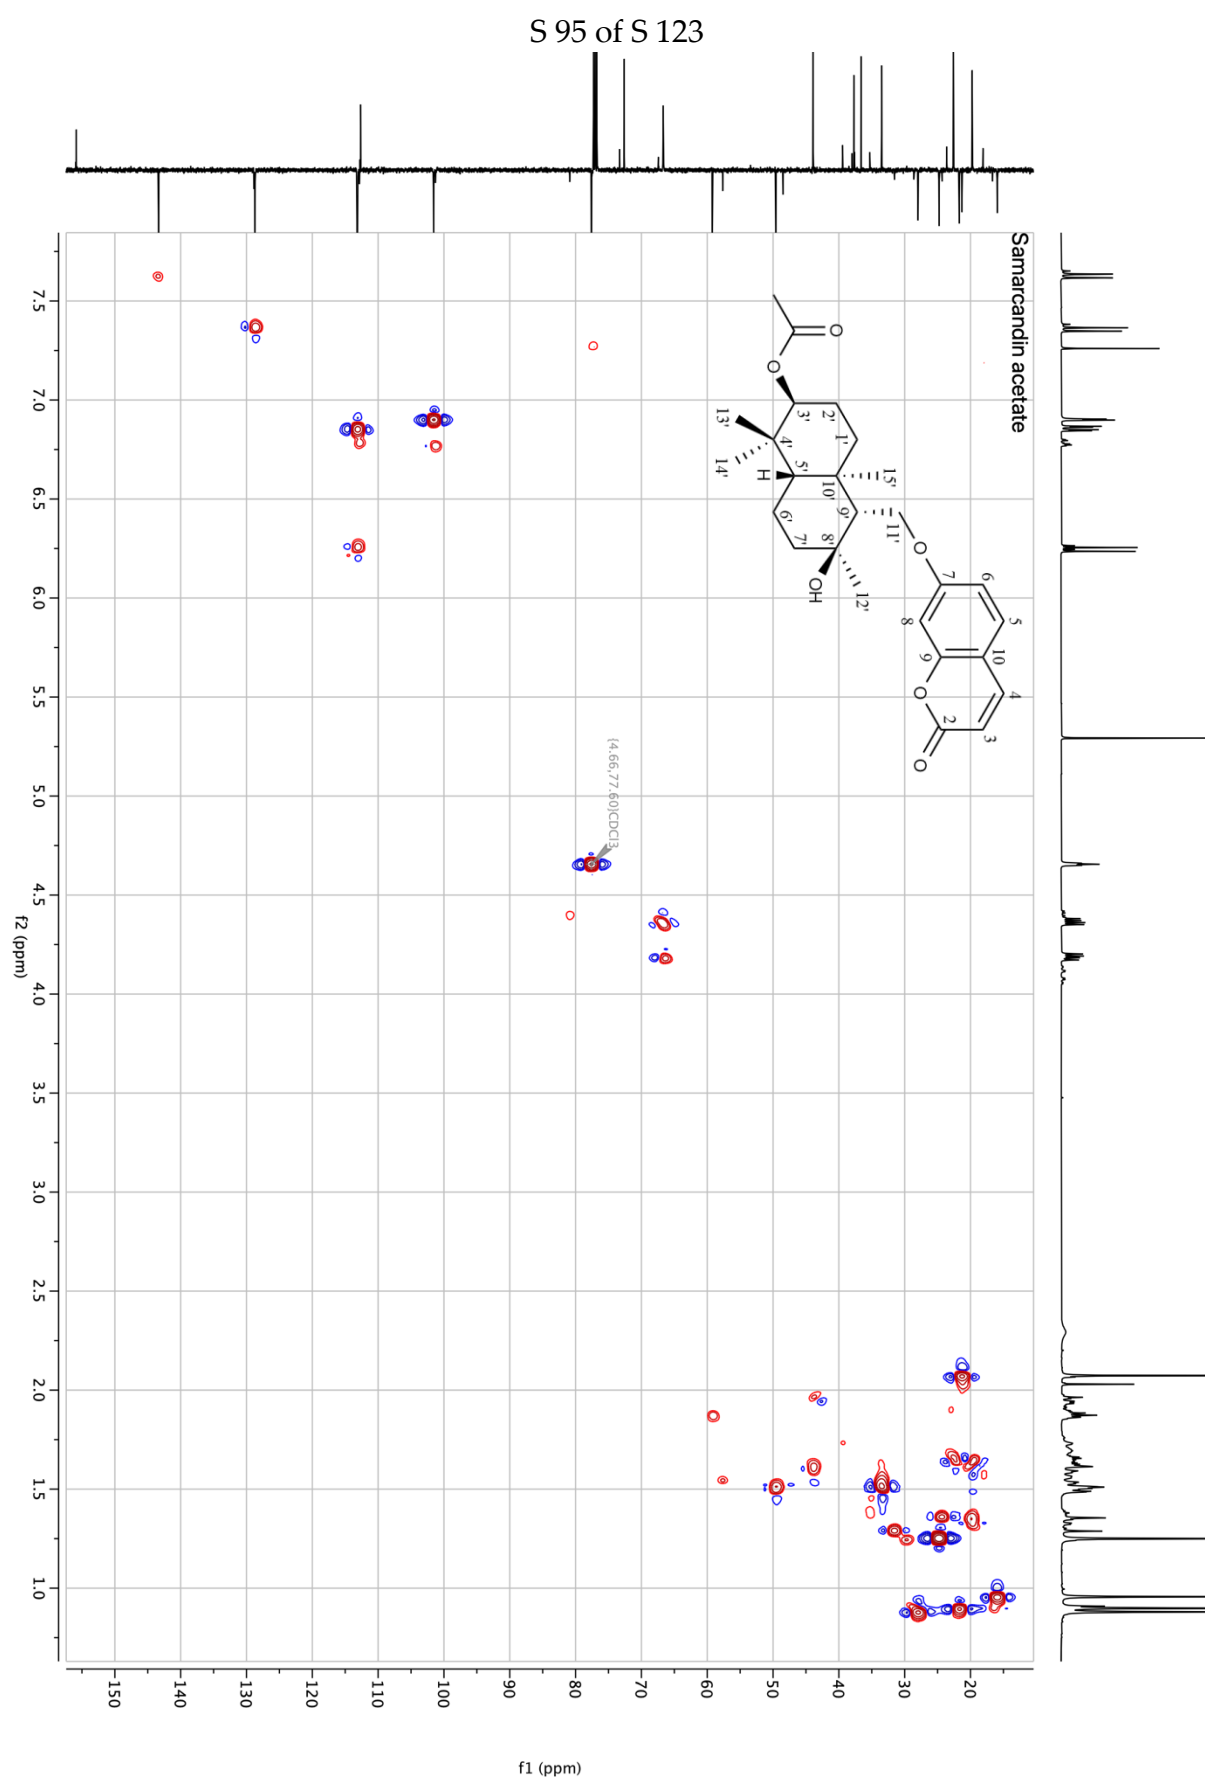

**Figure S89.** HSQC spectrum (CDCl<sub>3</sub>) of samarcandin acetate (15)

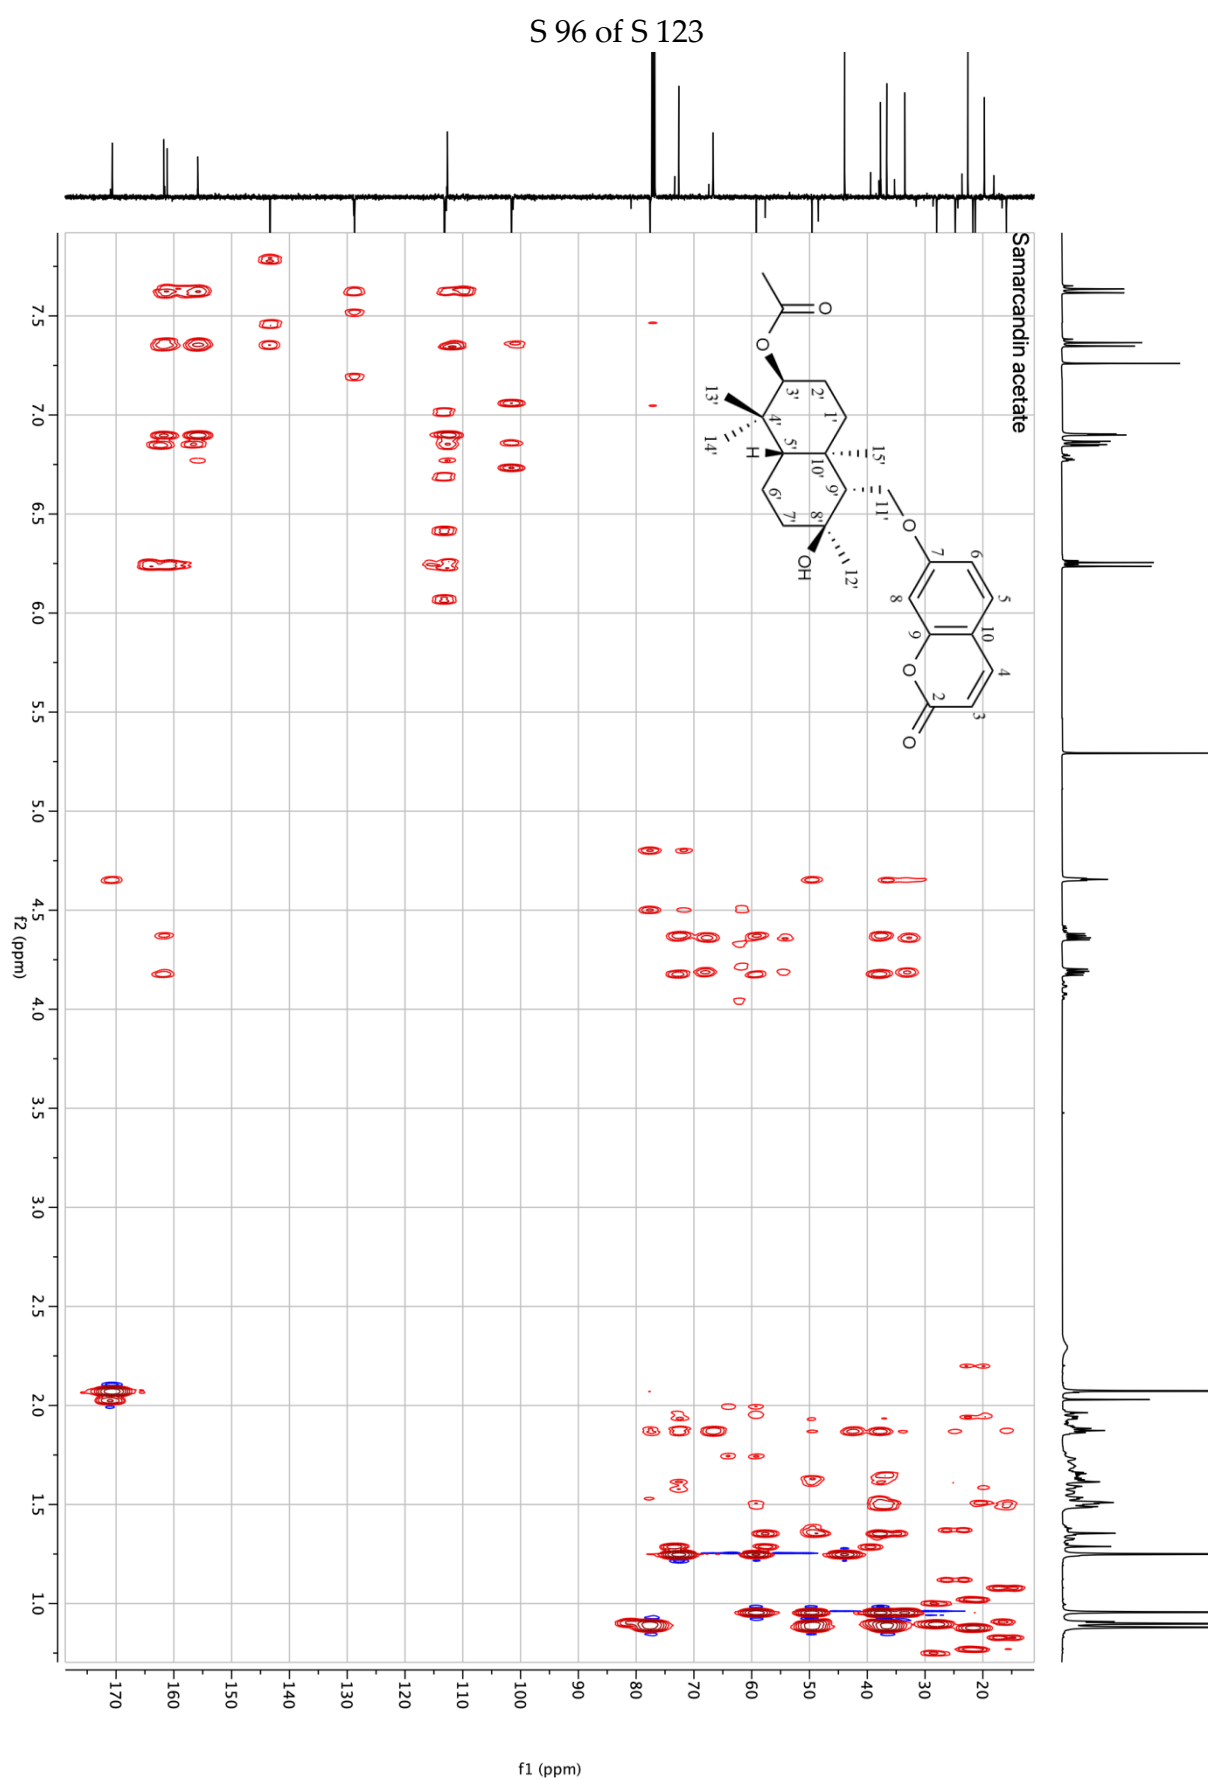

**Figure S90.** HMBC spectrum (CDCl<sub>3</sub>) of samarcandin acetate (15)

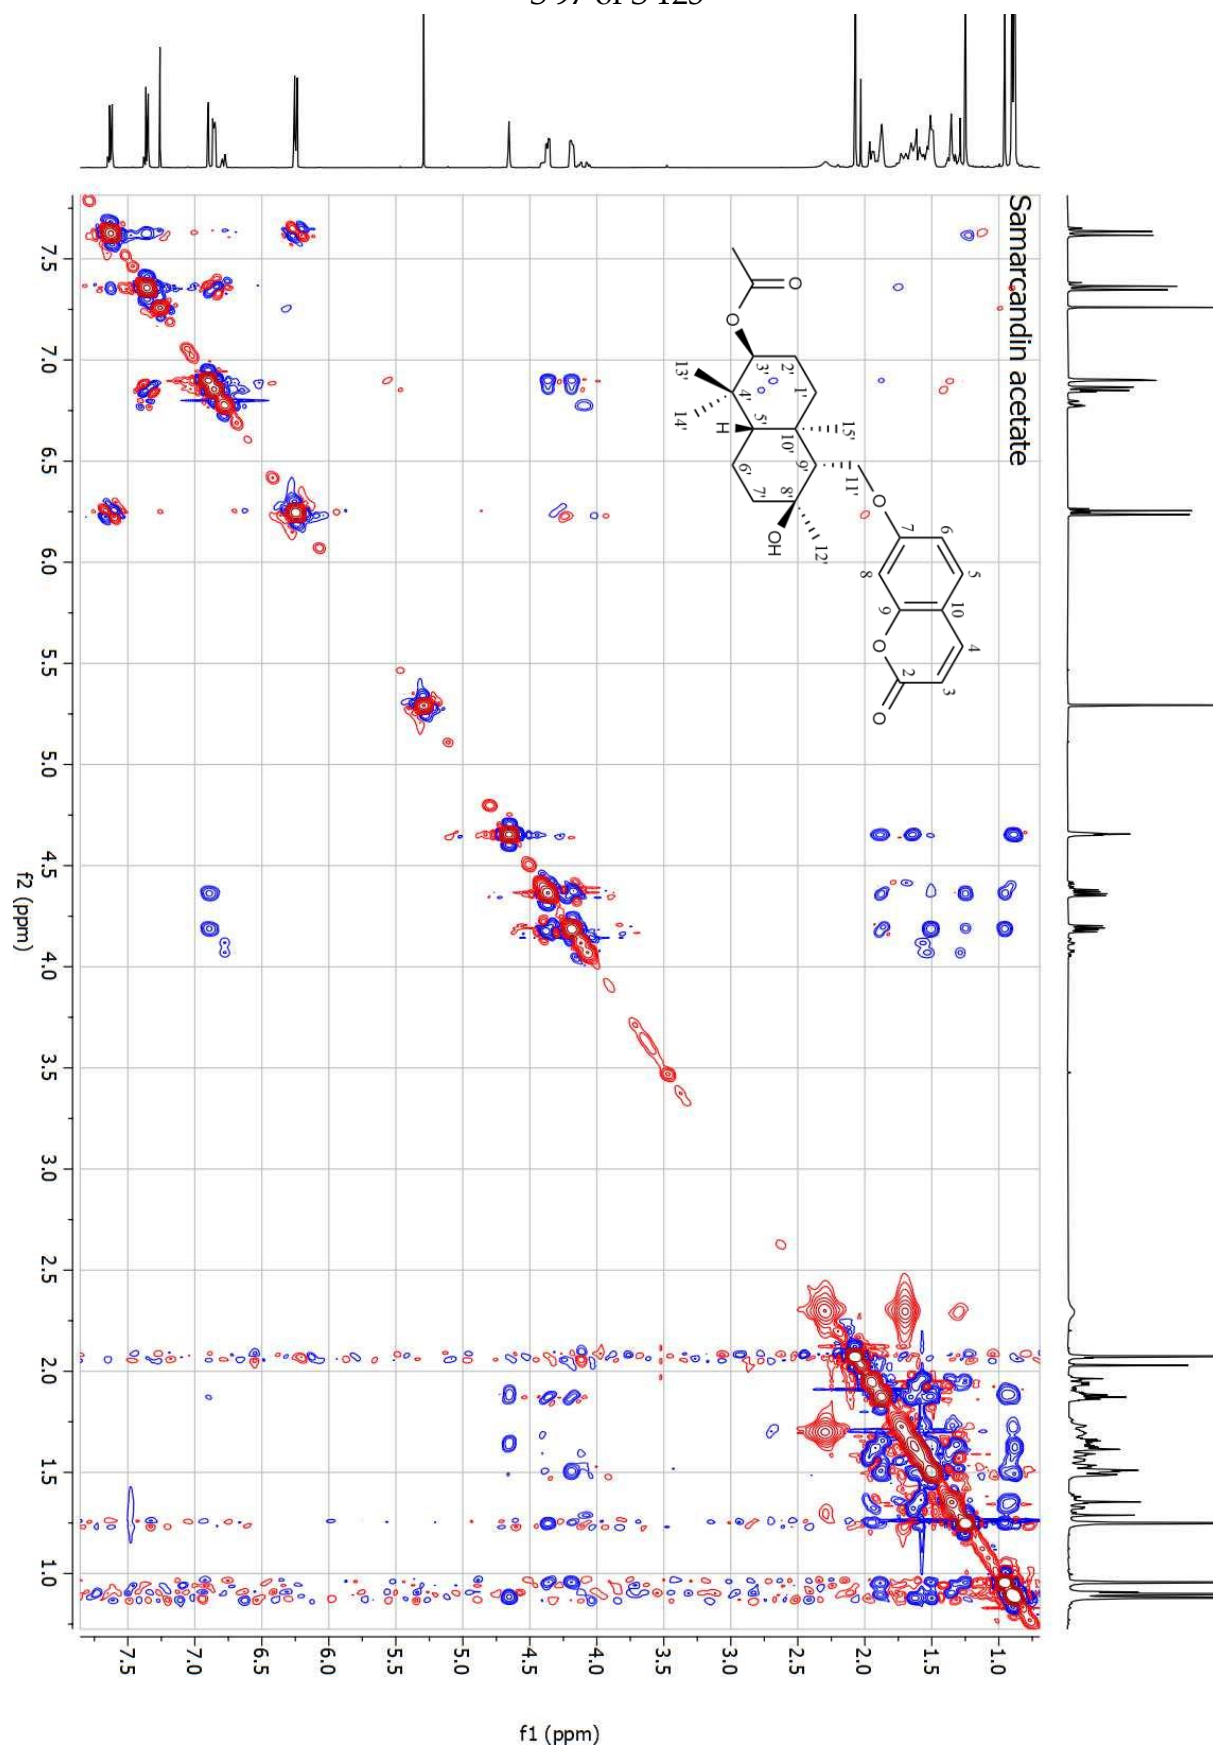

**Figure S91.** NOESY spectrum (CDCl<sub>3</sub>) of samarcandin acetate (15)

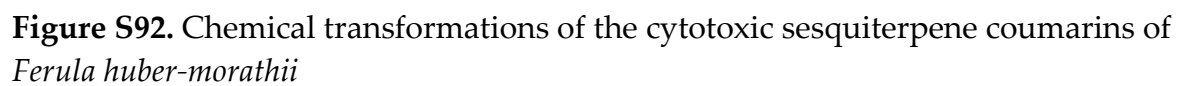

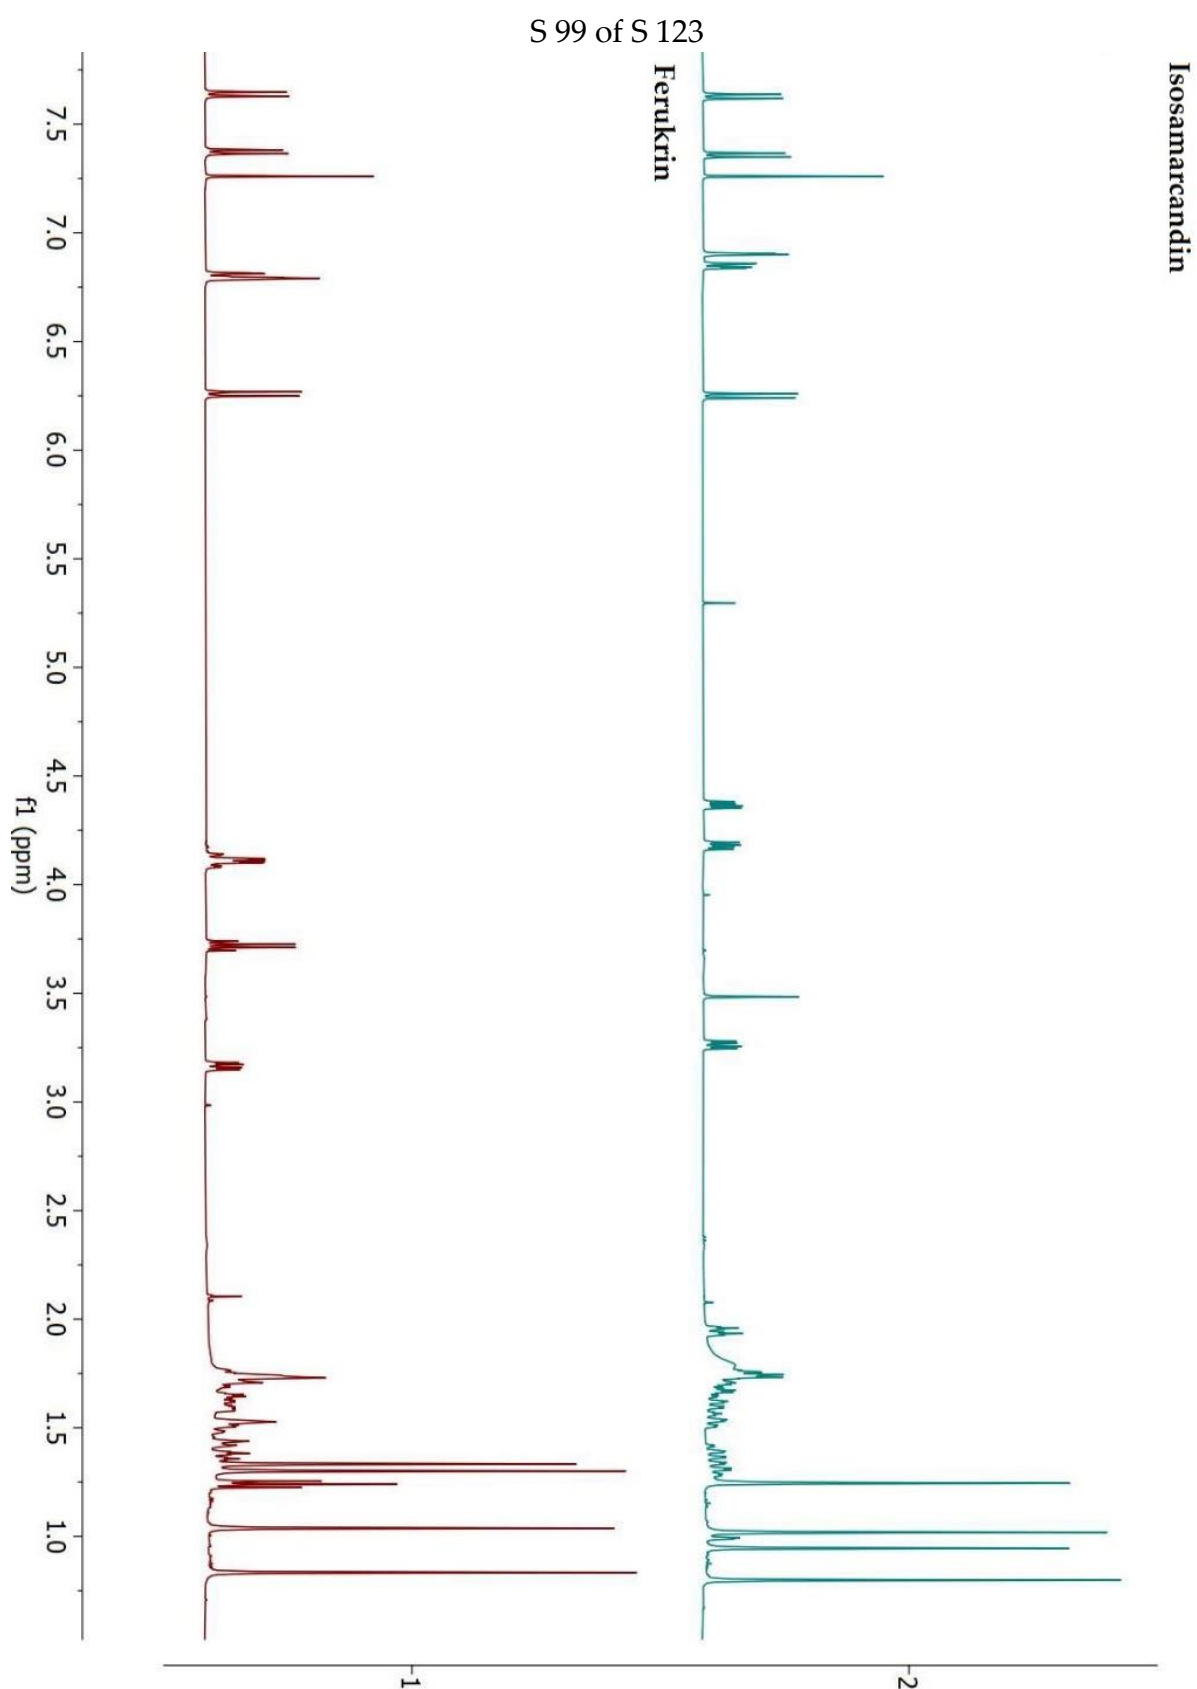

**Figure S93.** Comparison of  $^1\text{H}$ -NMR spectra of isosamarcandin (**16**) and ferukrin (**9**)

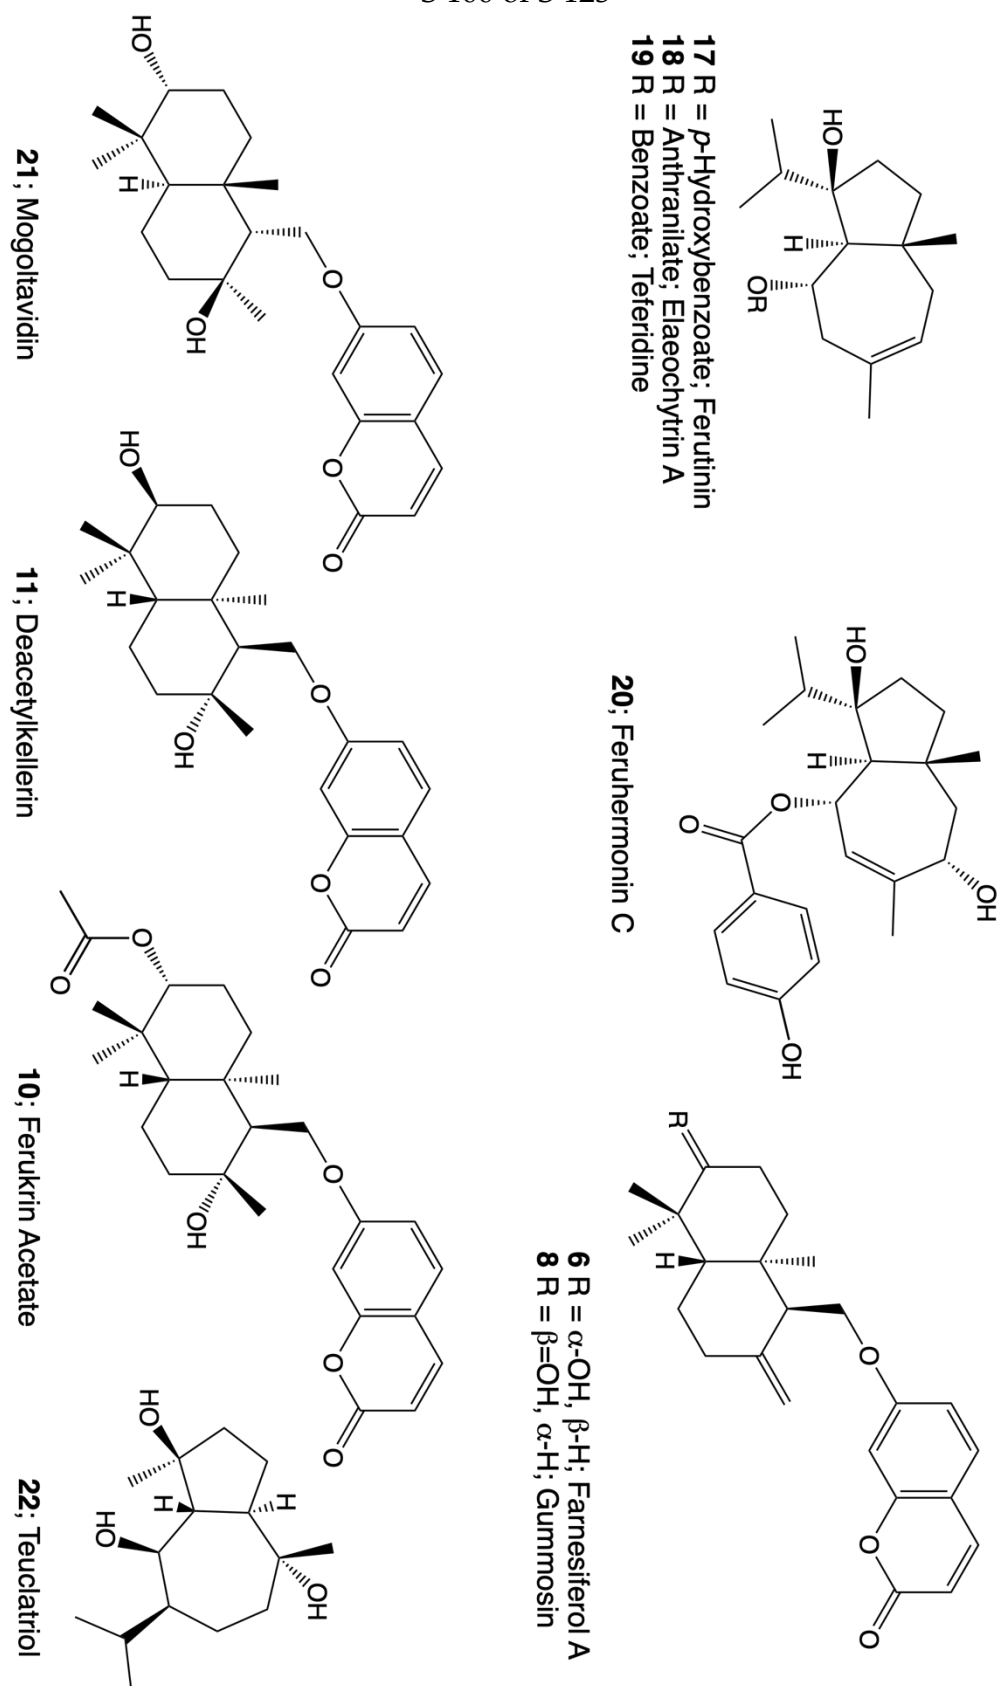

**Figure S94.** Previously proposed structures of sesquiterpene compounds isolated from the chloroform extract of *Ferula huber-morathii* [3]



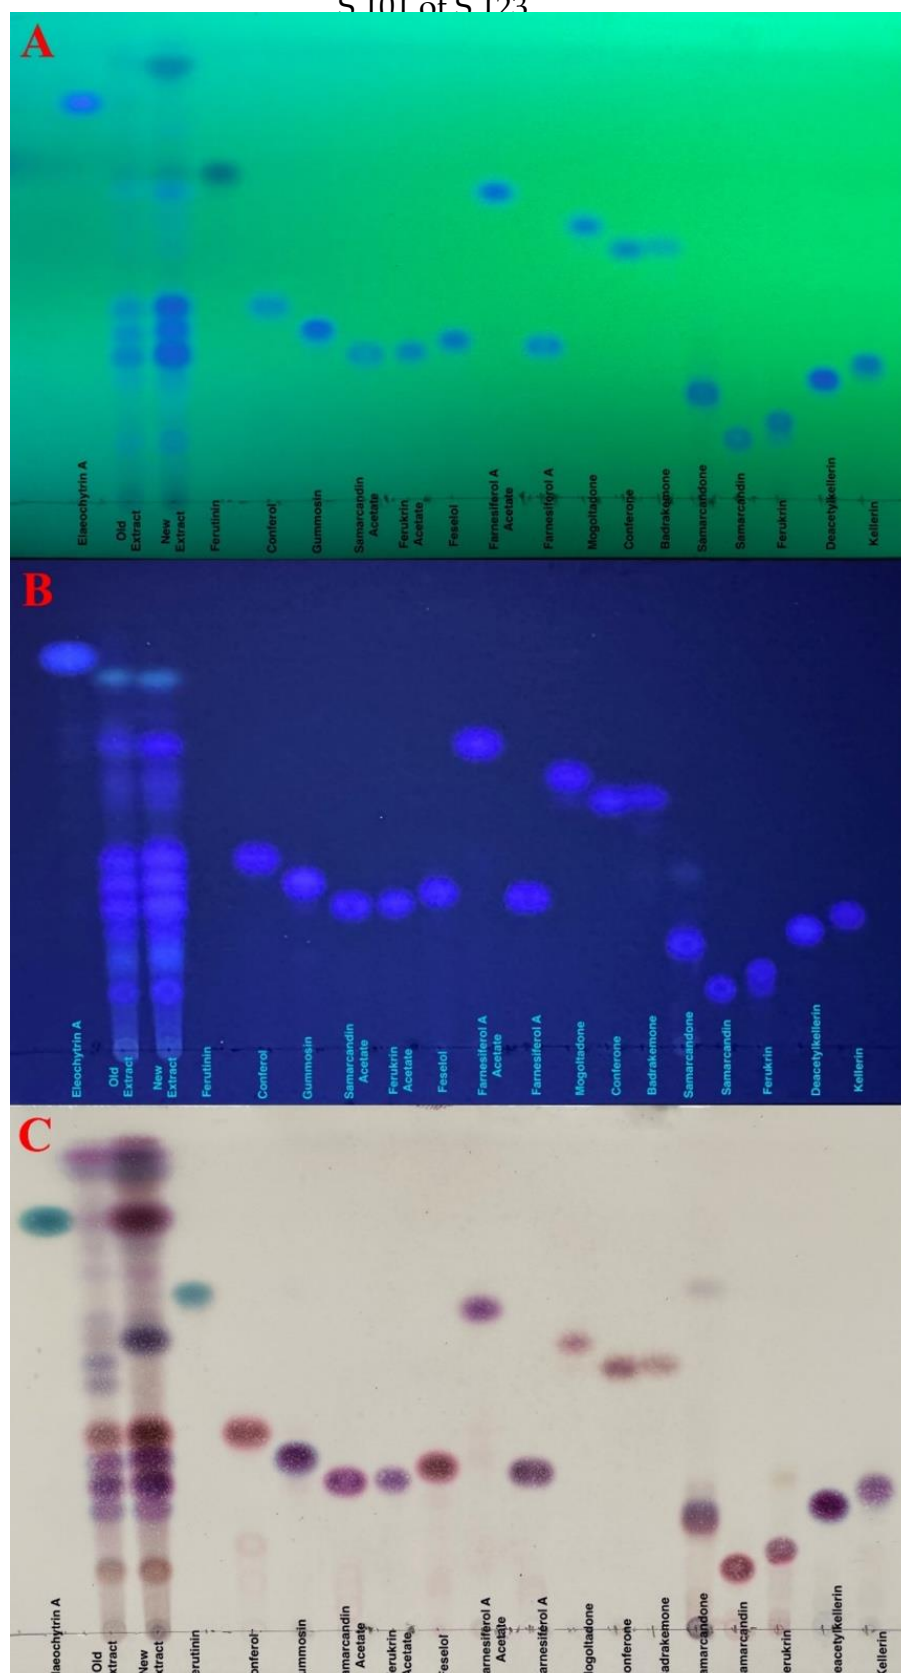

**Figure S95.** TLC comparison of the dichloromethane extracts of *Ferula huber-morathii* with reference compounds; elaeochoytrin A (18) and ferutinin (17), and isolated sesquiterpene coumarins (1-15), mobile phase; Hxn:EtOAc (6:4), detection; A: 254 nm; B: 366 nm; C: Anisaldehyde reagent

S 102 of S 123

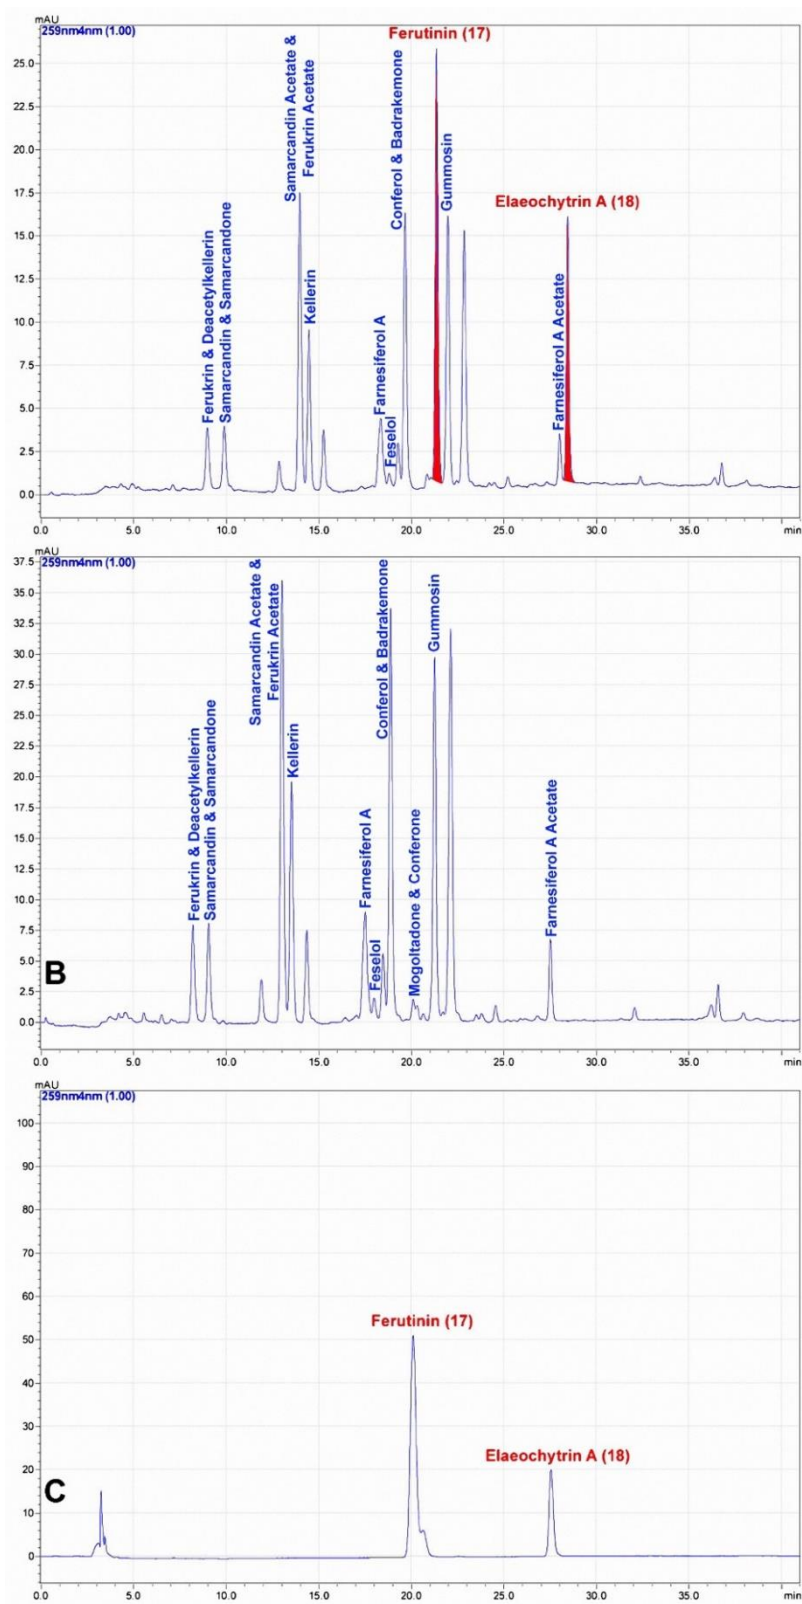

**Figure S96.** A. HPLC chromatogram of the dichloromethane root extract of *Ferula huber-morathii* spiked with reference compounds ferutin (17) and elaeochytrin A (18), B. HPLC chromatogram of the dichloromethane root extract of *F. huber-morathii*

and **C.** HPLC chromatogram of the mixture of reference compounds ferutinin (**17**) and elaeochytrin A (**18**). Detection: UV detector at 259 nm

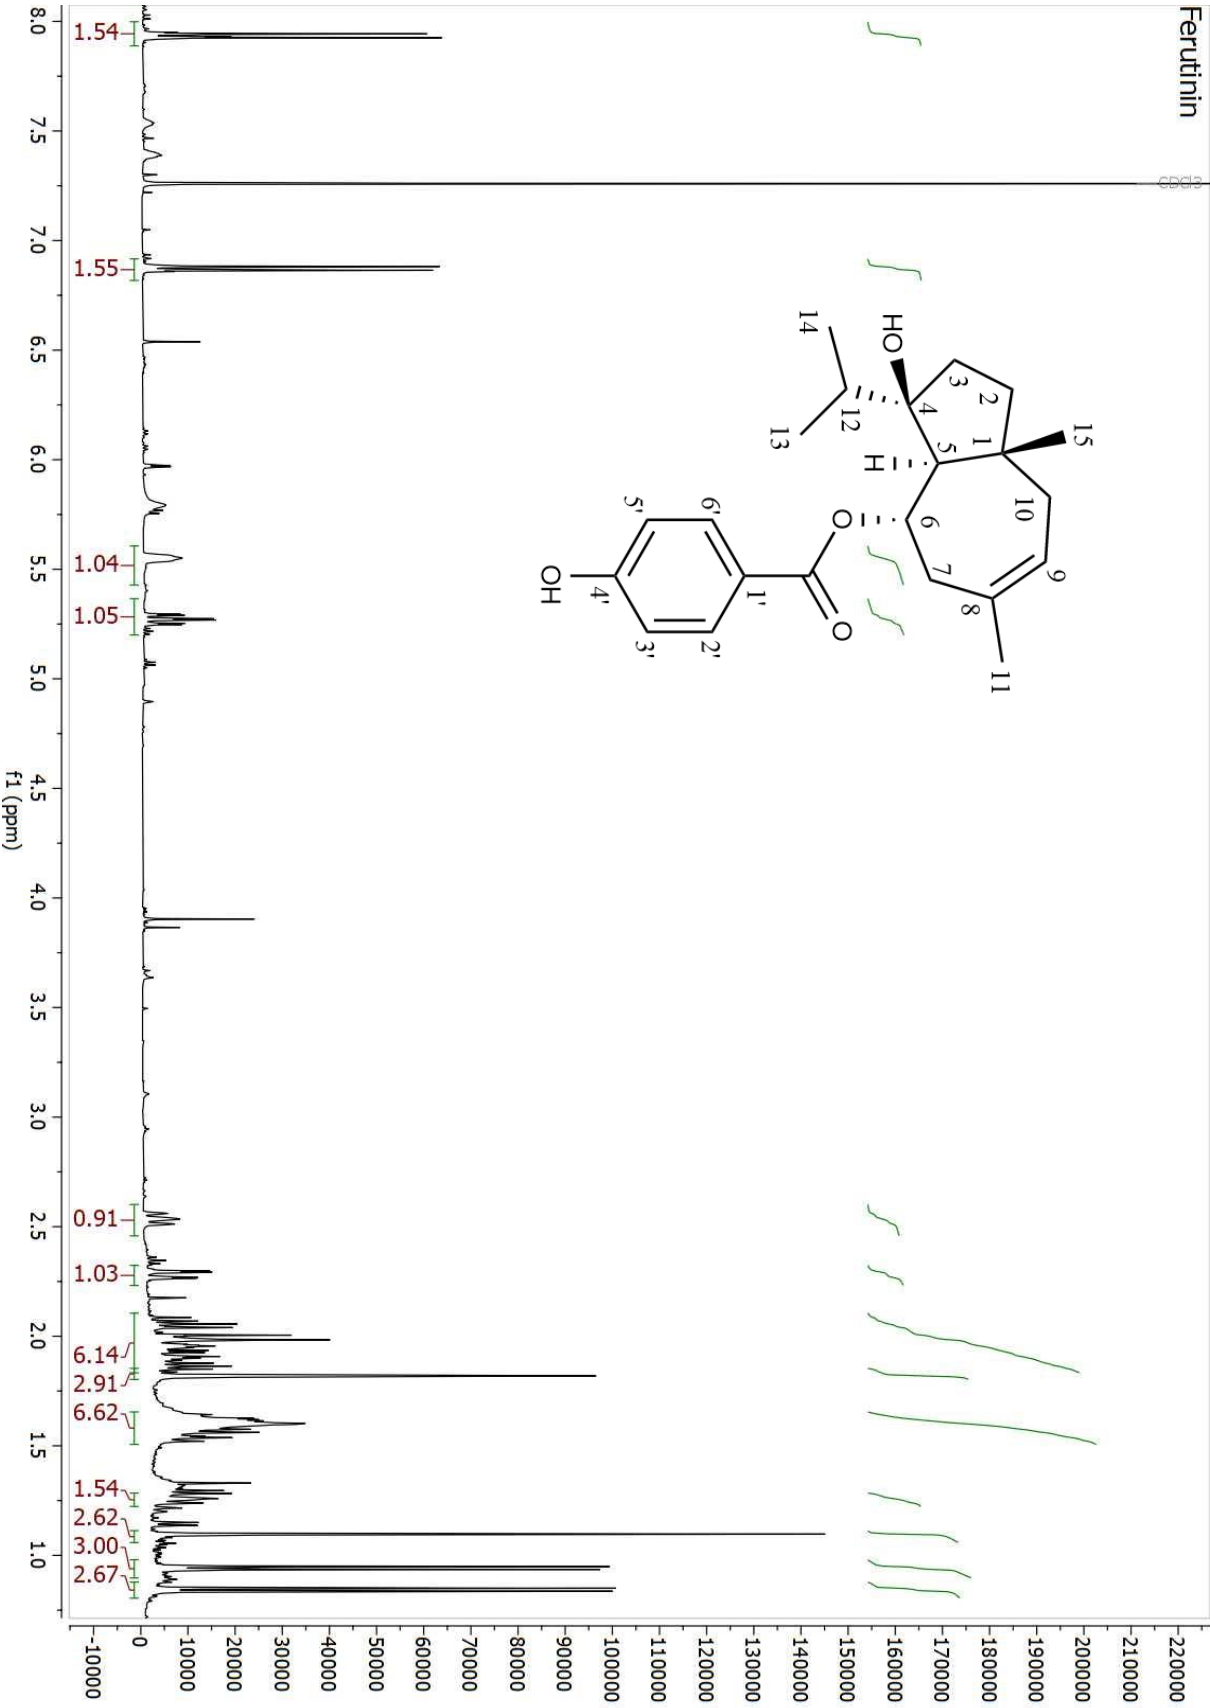

**Figure S97.**  $^1\text{H}$ -NMR spectrum (500 MHz,  $\text{CDCl}_3$ ) of reference compound ferutinin (17)

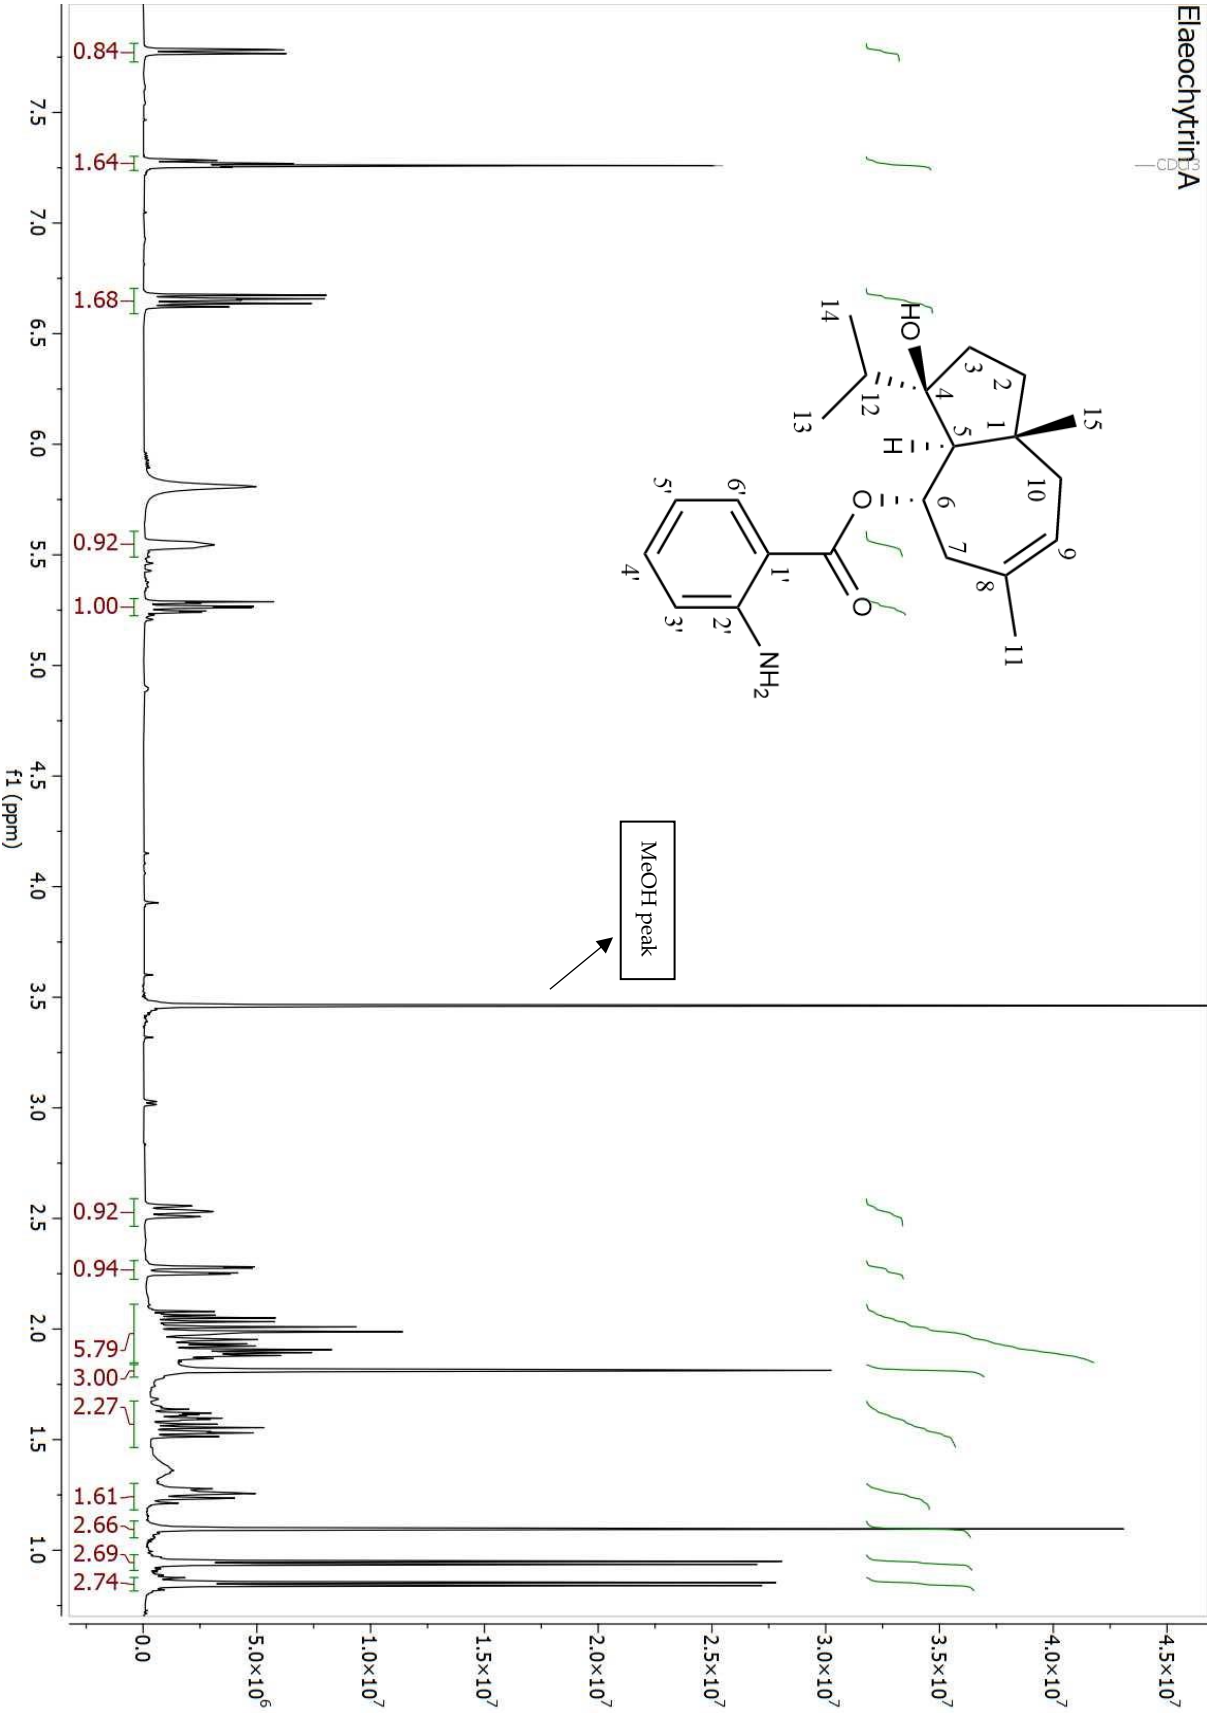

**Figure S98.**  $^1\text{H}$ -NMR spectrum (500 MHz,  $\text{CDCl}_3$ ) of reference compound elaeochtyrin A (**18**)

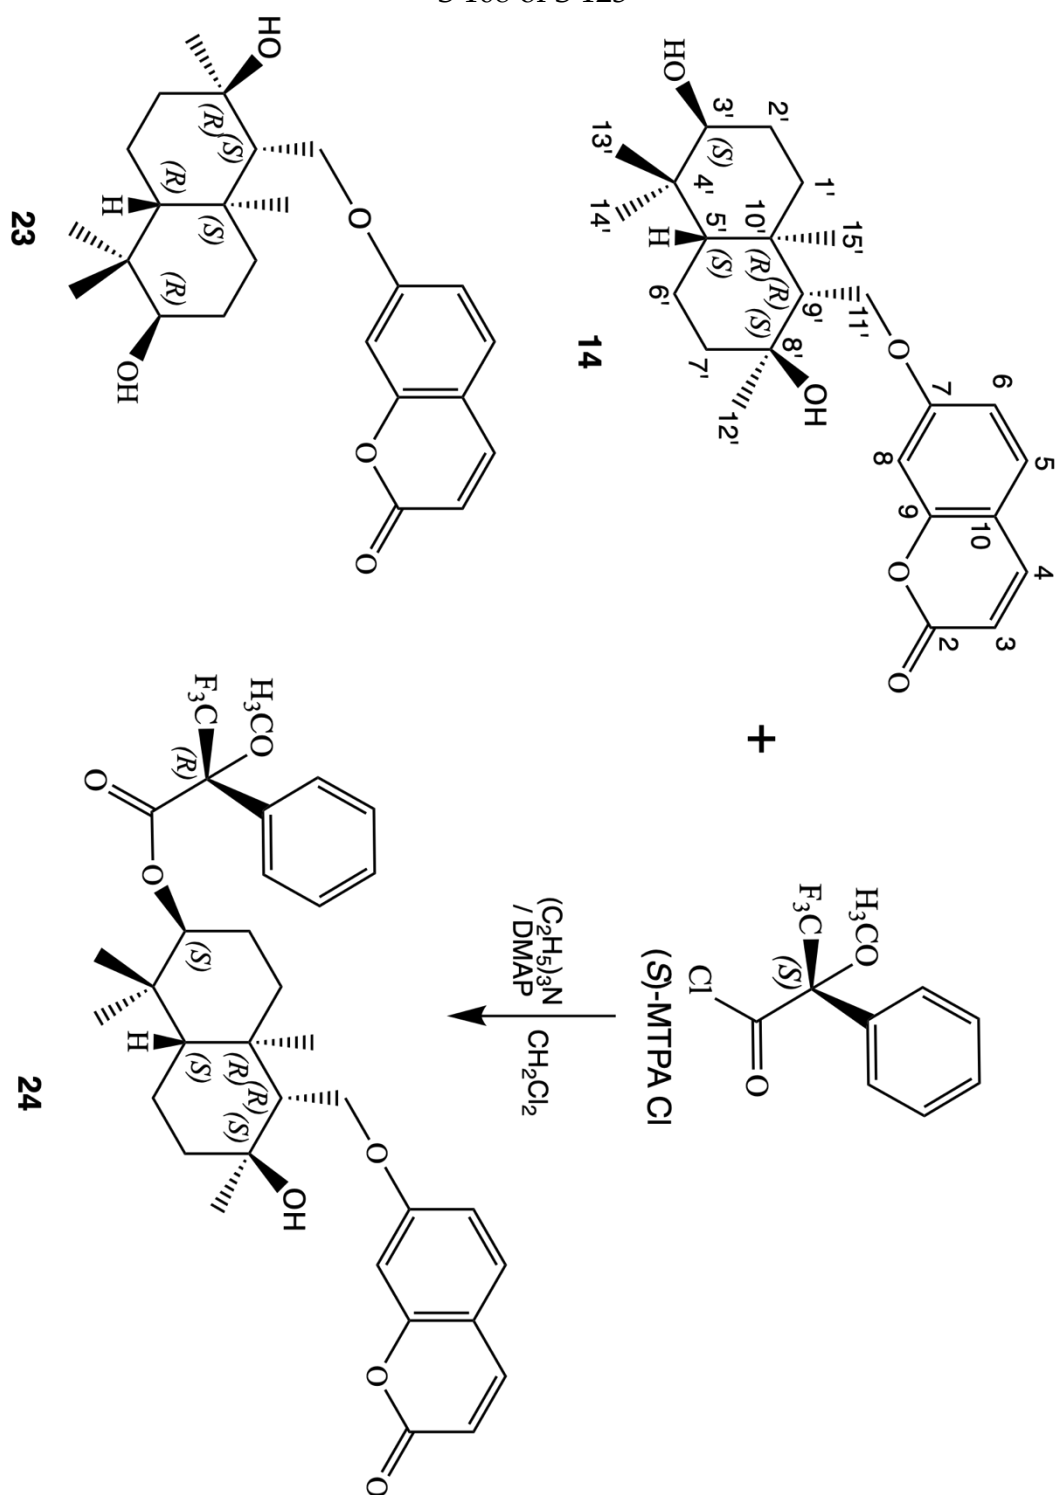

**Figure S99.** Preparation of the (R)-MTPA ester of samarcandin (**24**) and structure of *ent*-samarcandin (**23**)



RMTPA Ester of Samarcandin

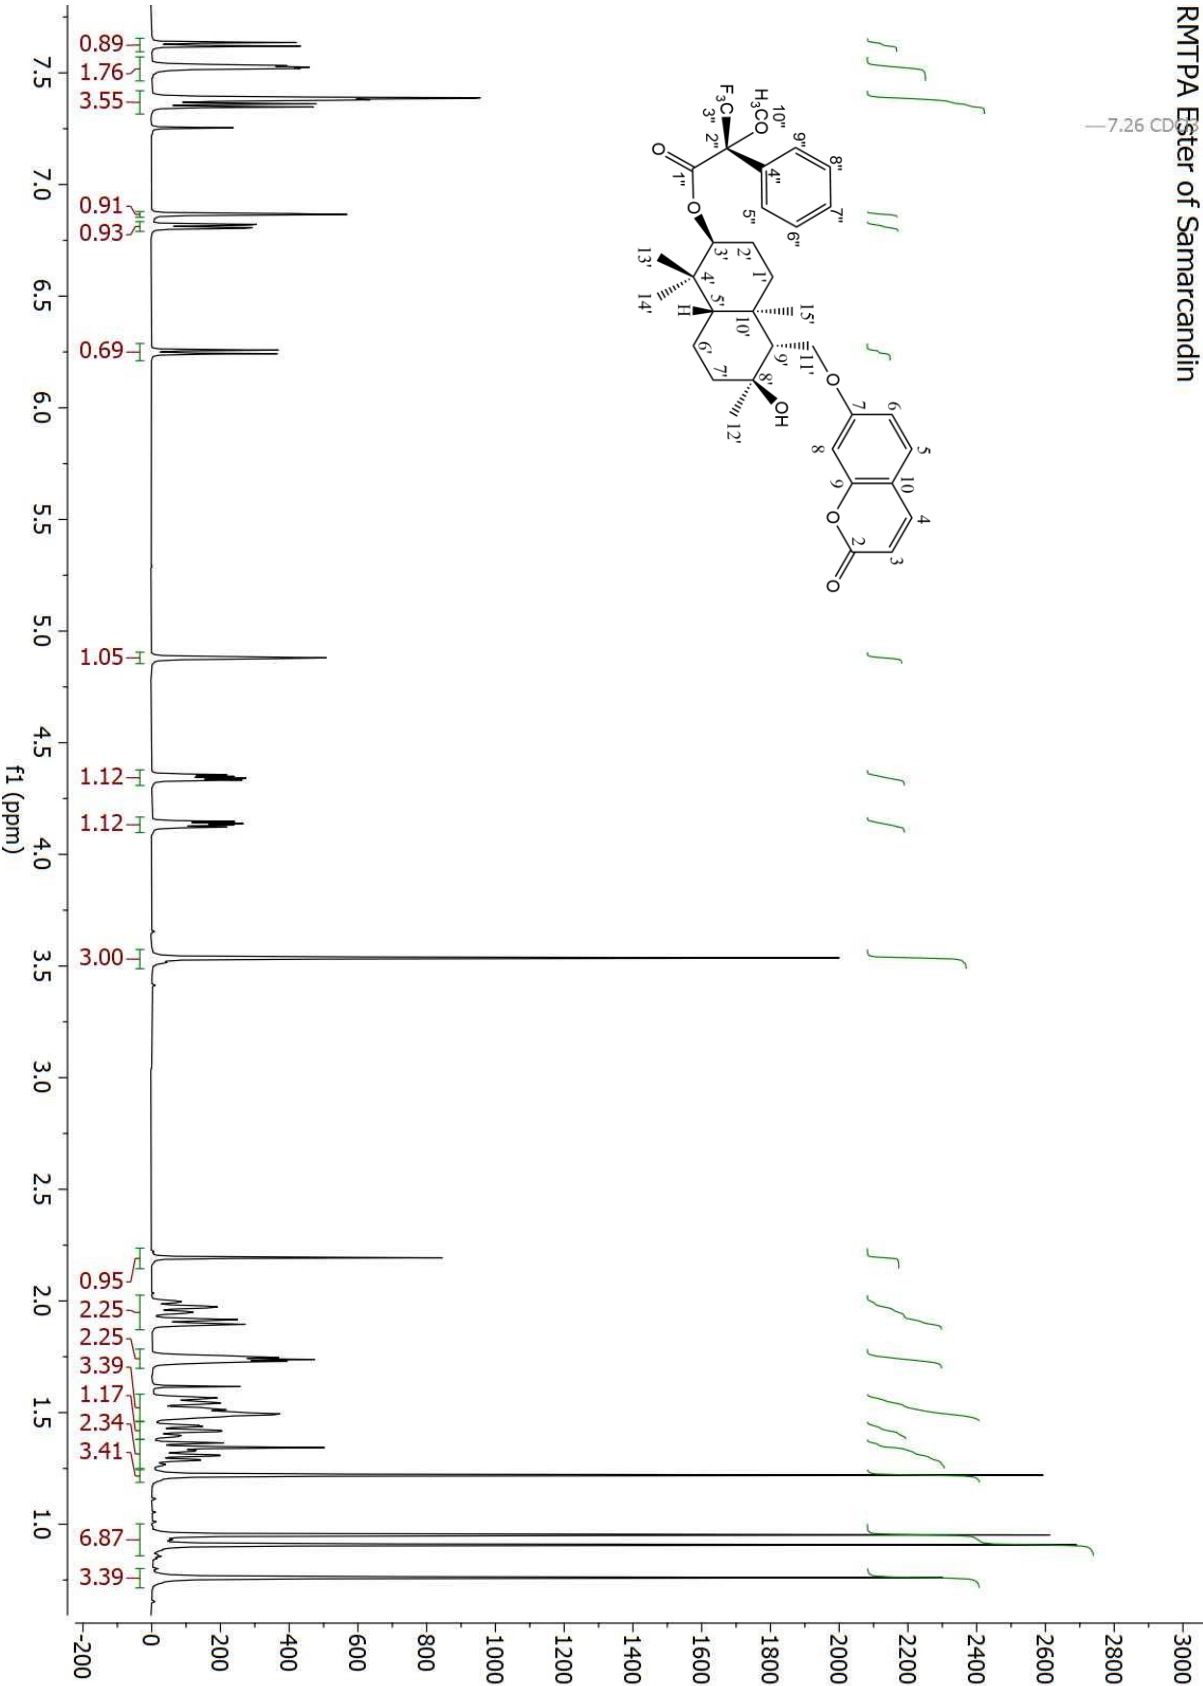

**Figure S100.**  $^1\text{H}$ -NMR spectrum (500 MHz,  $\text{CDCl}_3$ ) of (*R*)-MTPA ester of samarcandin (24)

RMTPA Ester of Samarcandin

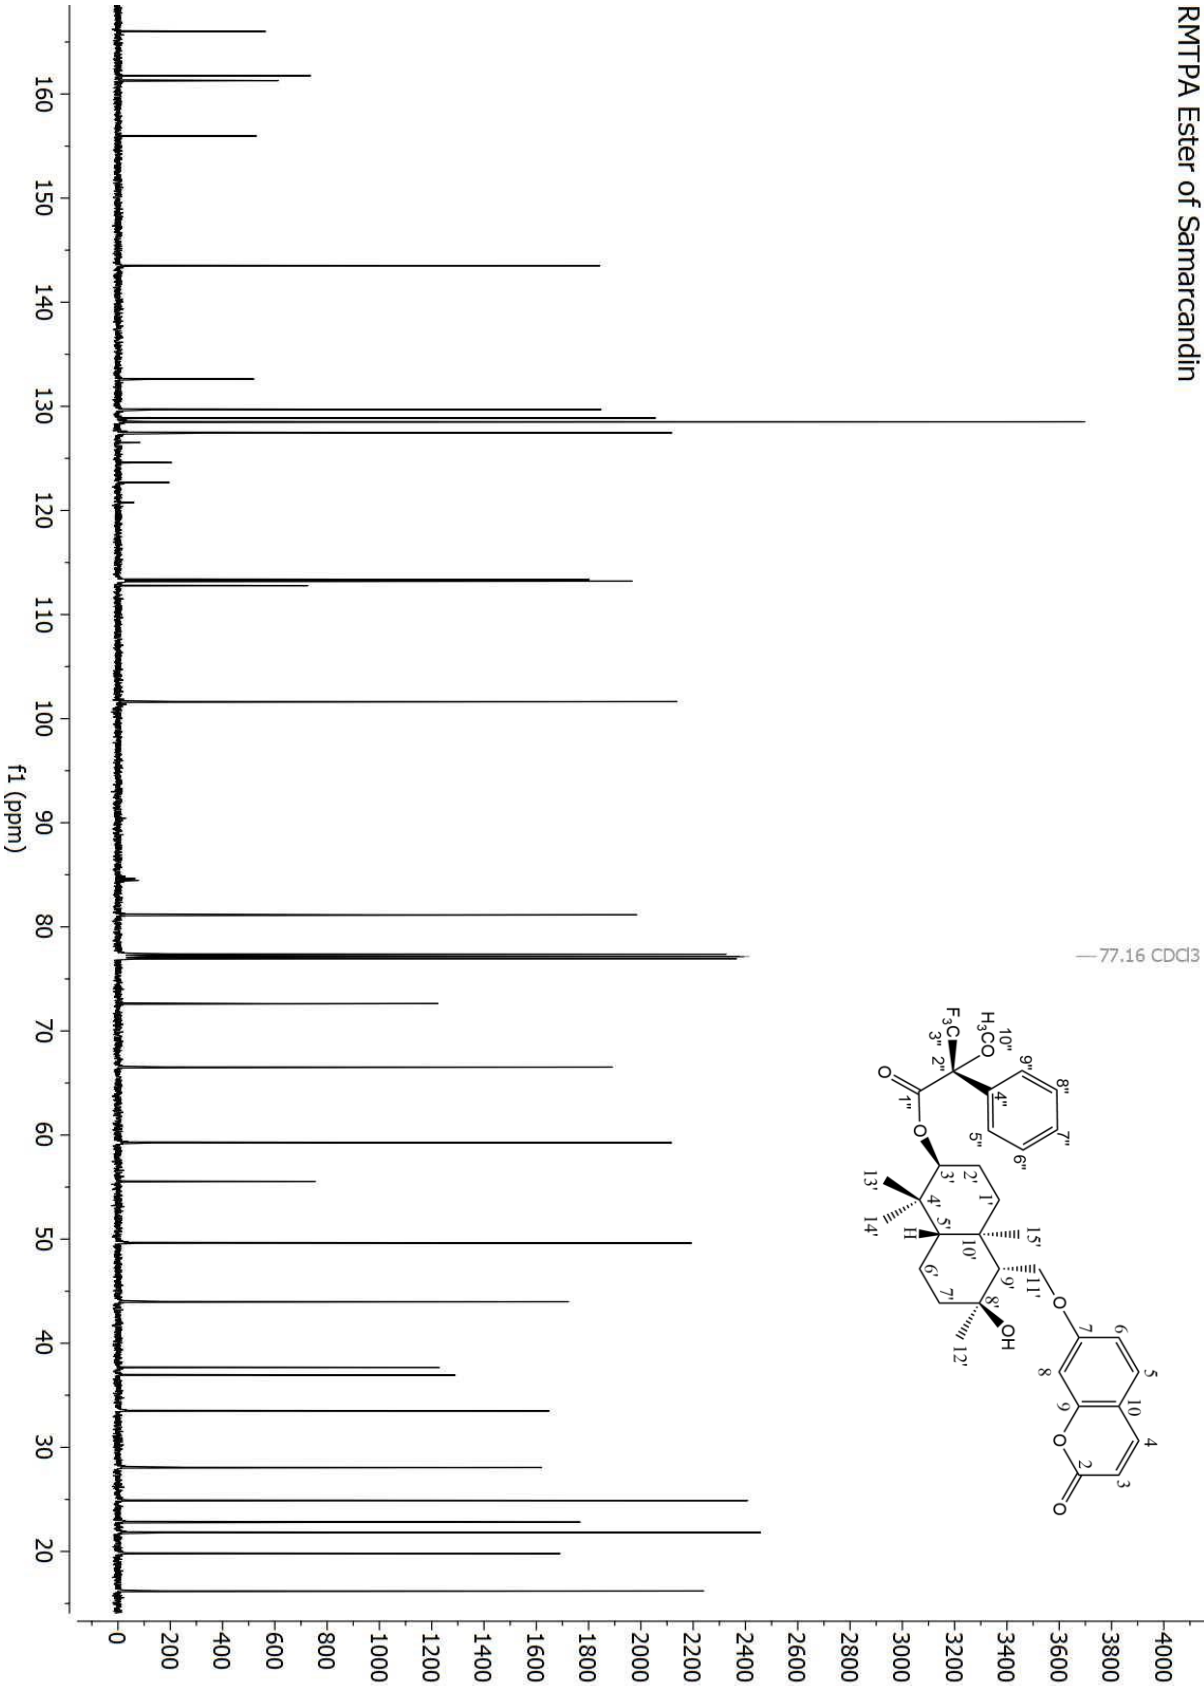

**Figure S101.**  $^{13}\text{C}$ -NMR spectrum (125 MHz,  $\text{CDCl}_3$ ) of (*R*)-MTPA ester of samarcandin (**24**)

S 113 of S 123

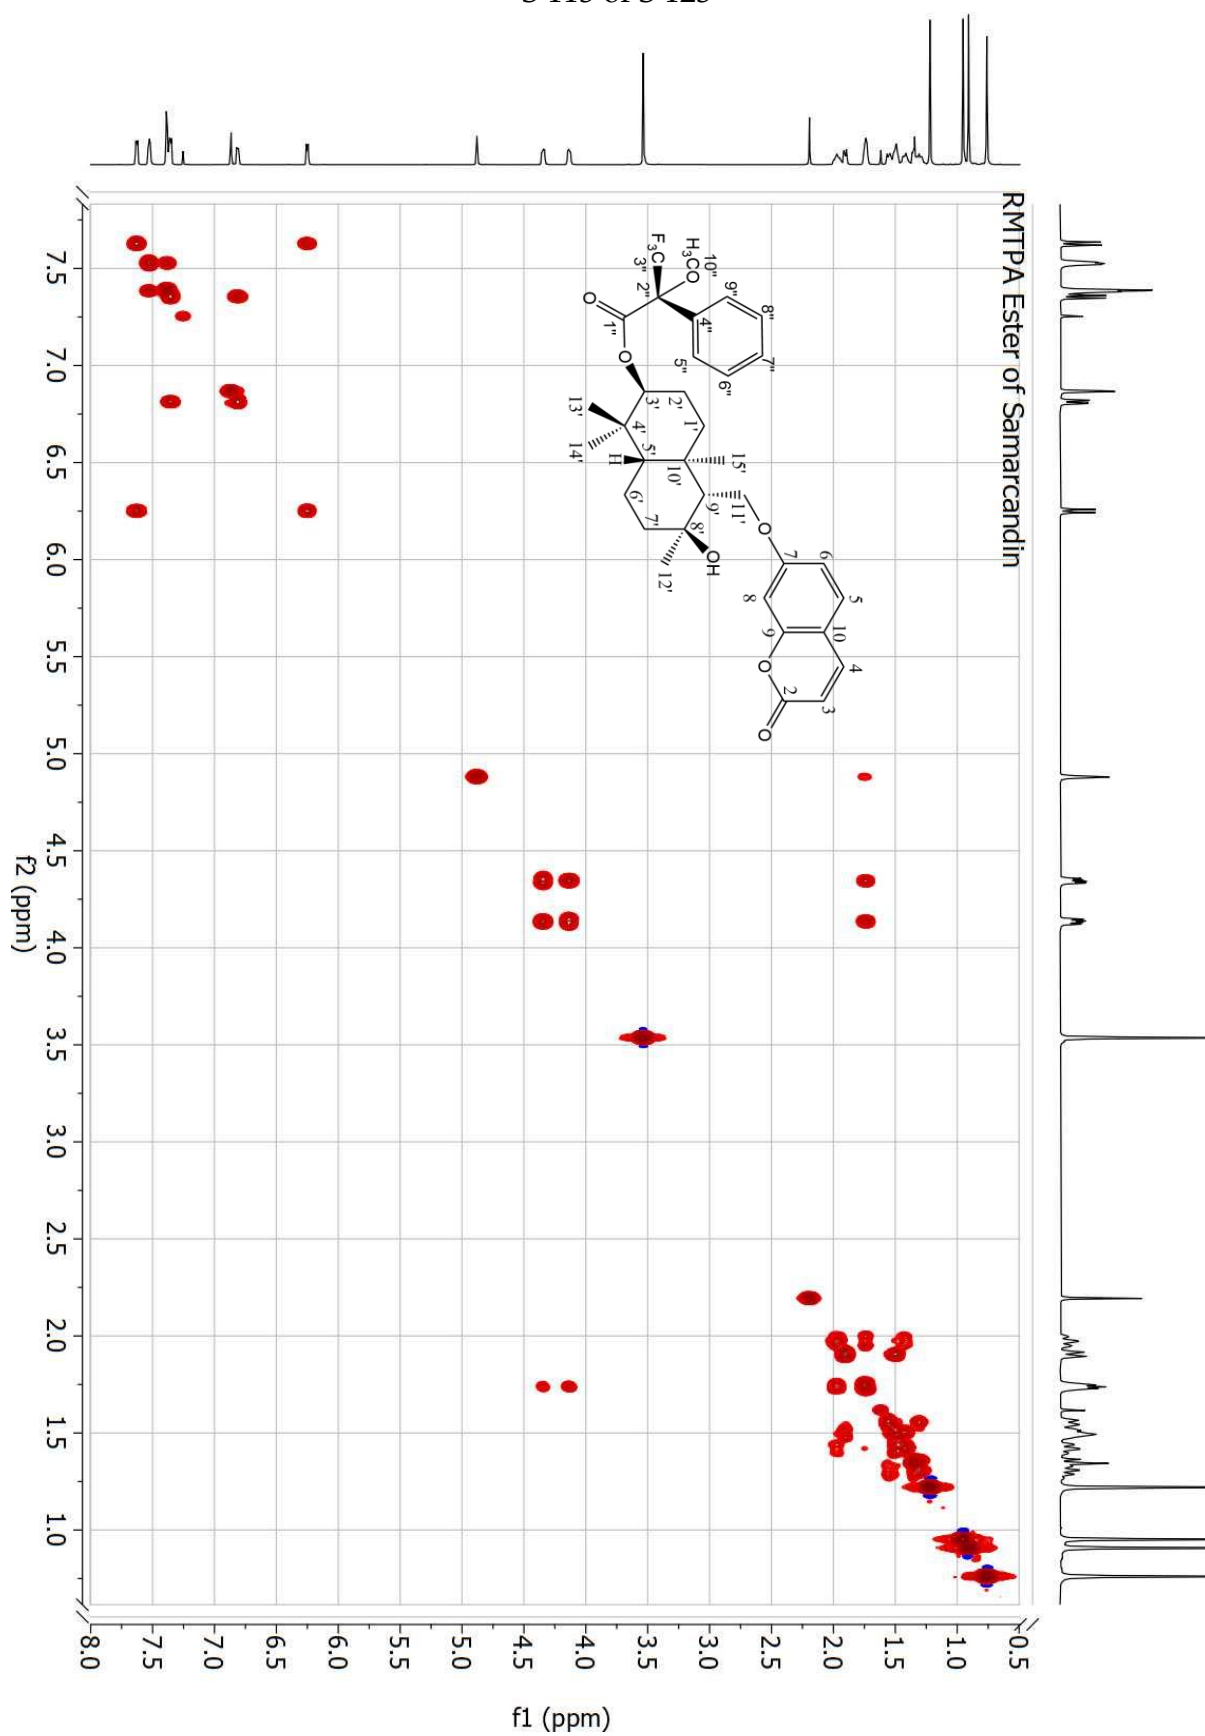**Figure S102.**  $^1\text{H}$ - $^1\text{H}$  COSY spectrum ( $\text{CDCl}_3$ ) of (R)-MTPA ester of samarcandin (24)

S 114 of S 123

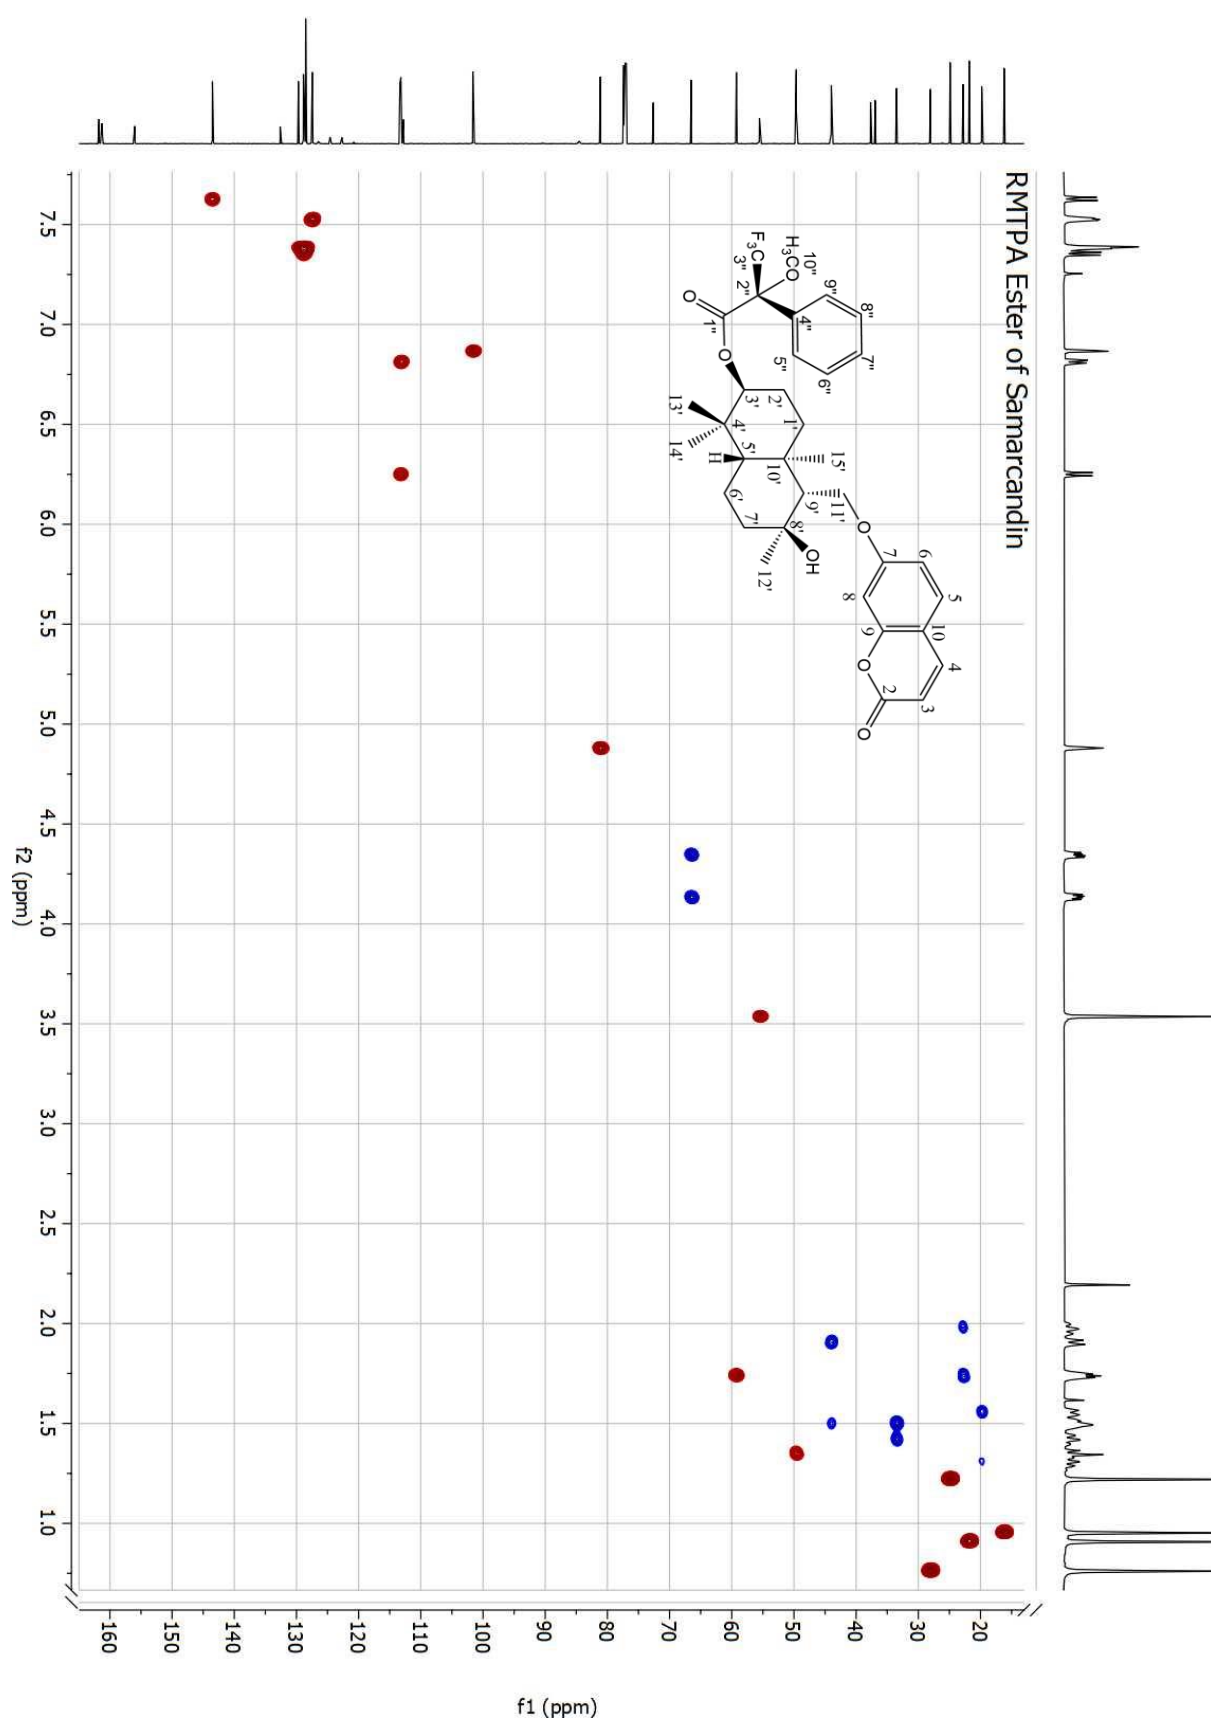**Figure S103.** HSQC spectrum of (*R*)-MTPA ester of samarcandin (**24**)

S 115 of S 123

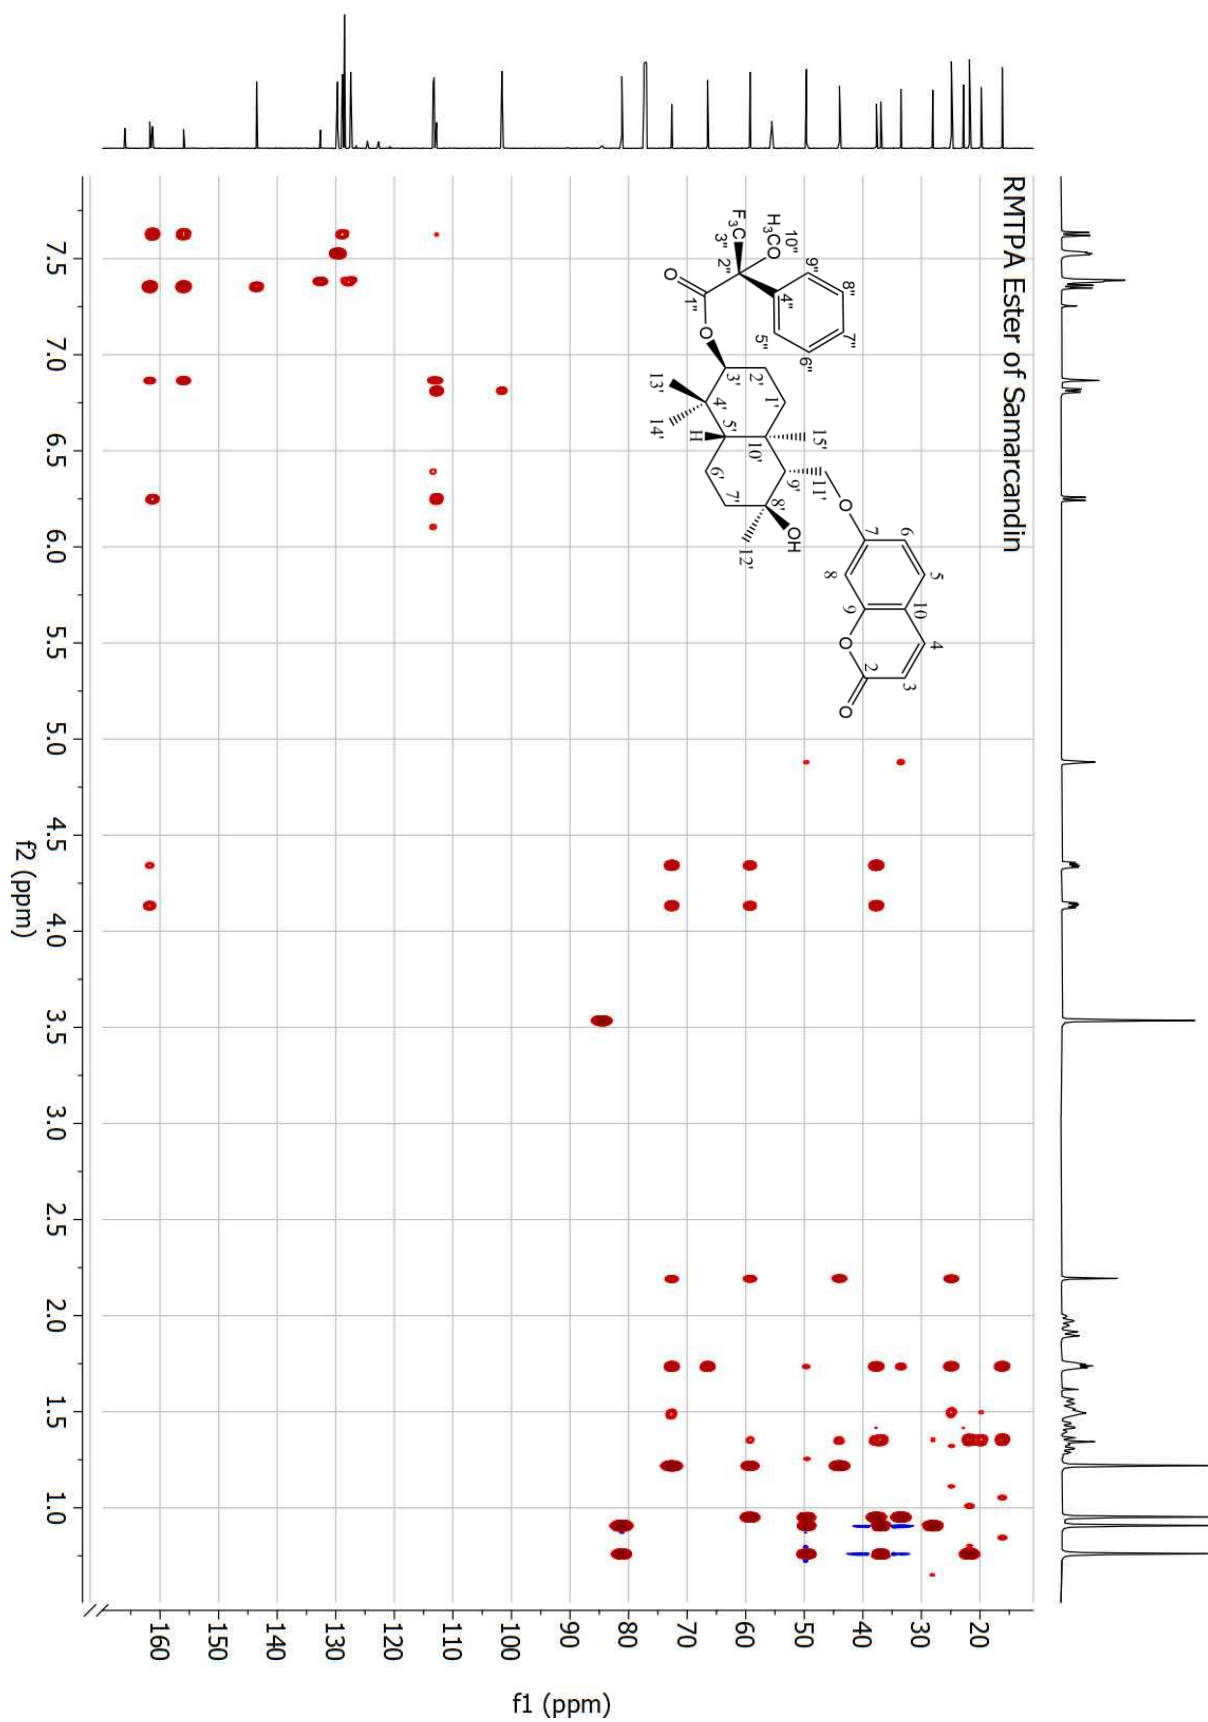**Figure S104.** HMBC spectrum of (R)-MTPA ester of samarcandin (24)

S 116 of S 123

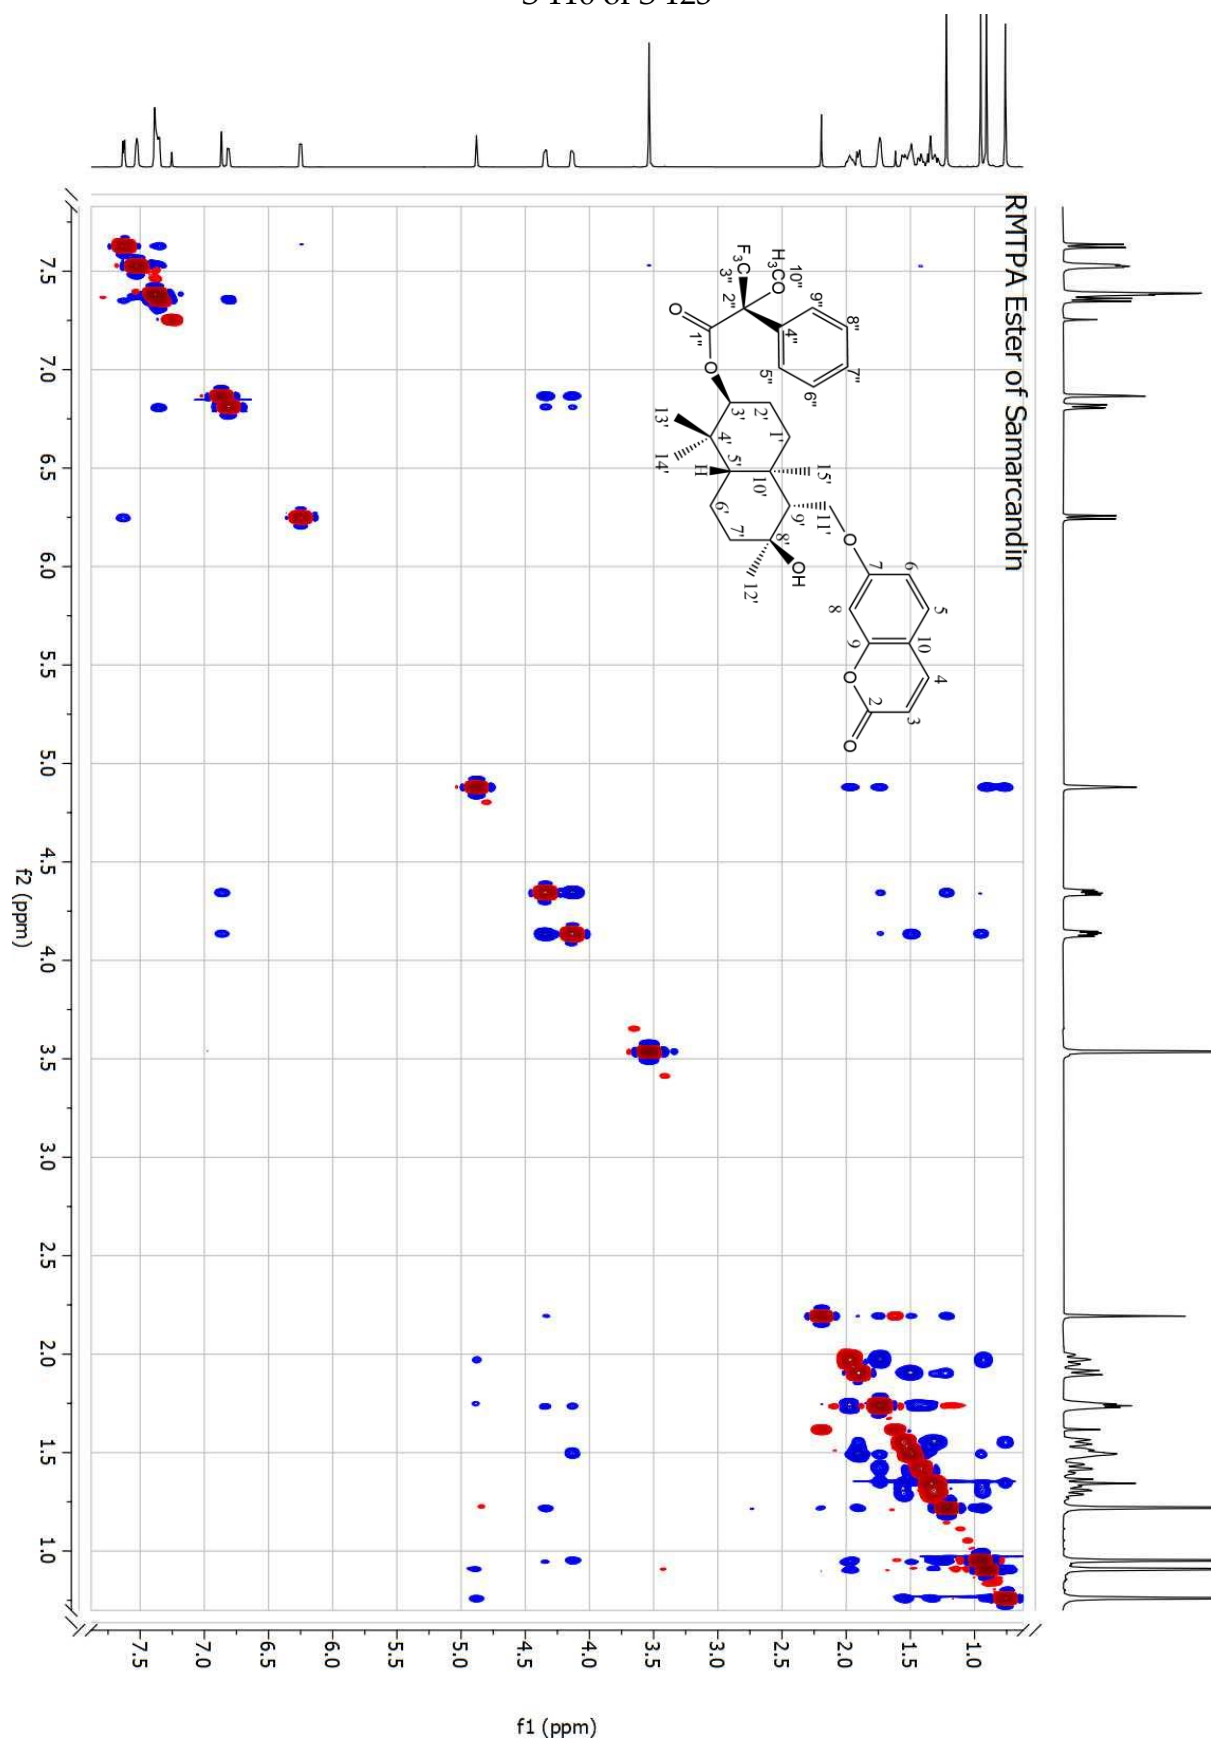**Figure S105.** NOESY spectrum of (R)-MTPA ester of samarcandin (24)



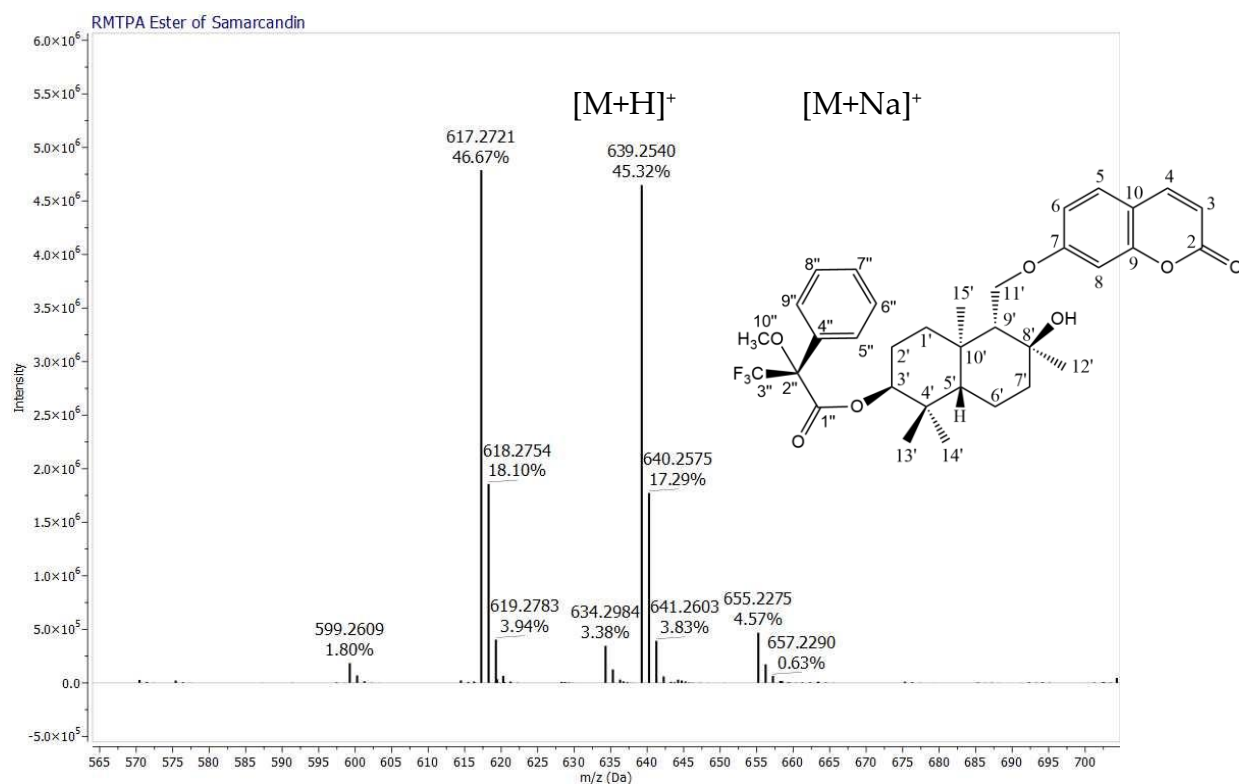

**Figure S106.** (+)-HRESIMS spectrum of (*R*)-MTPA ester of samarcandin (**24**)

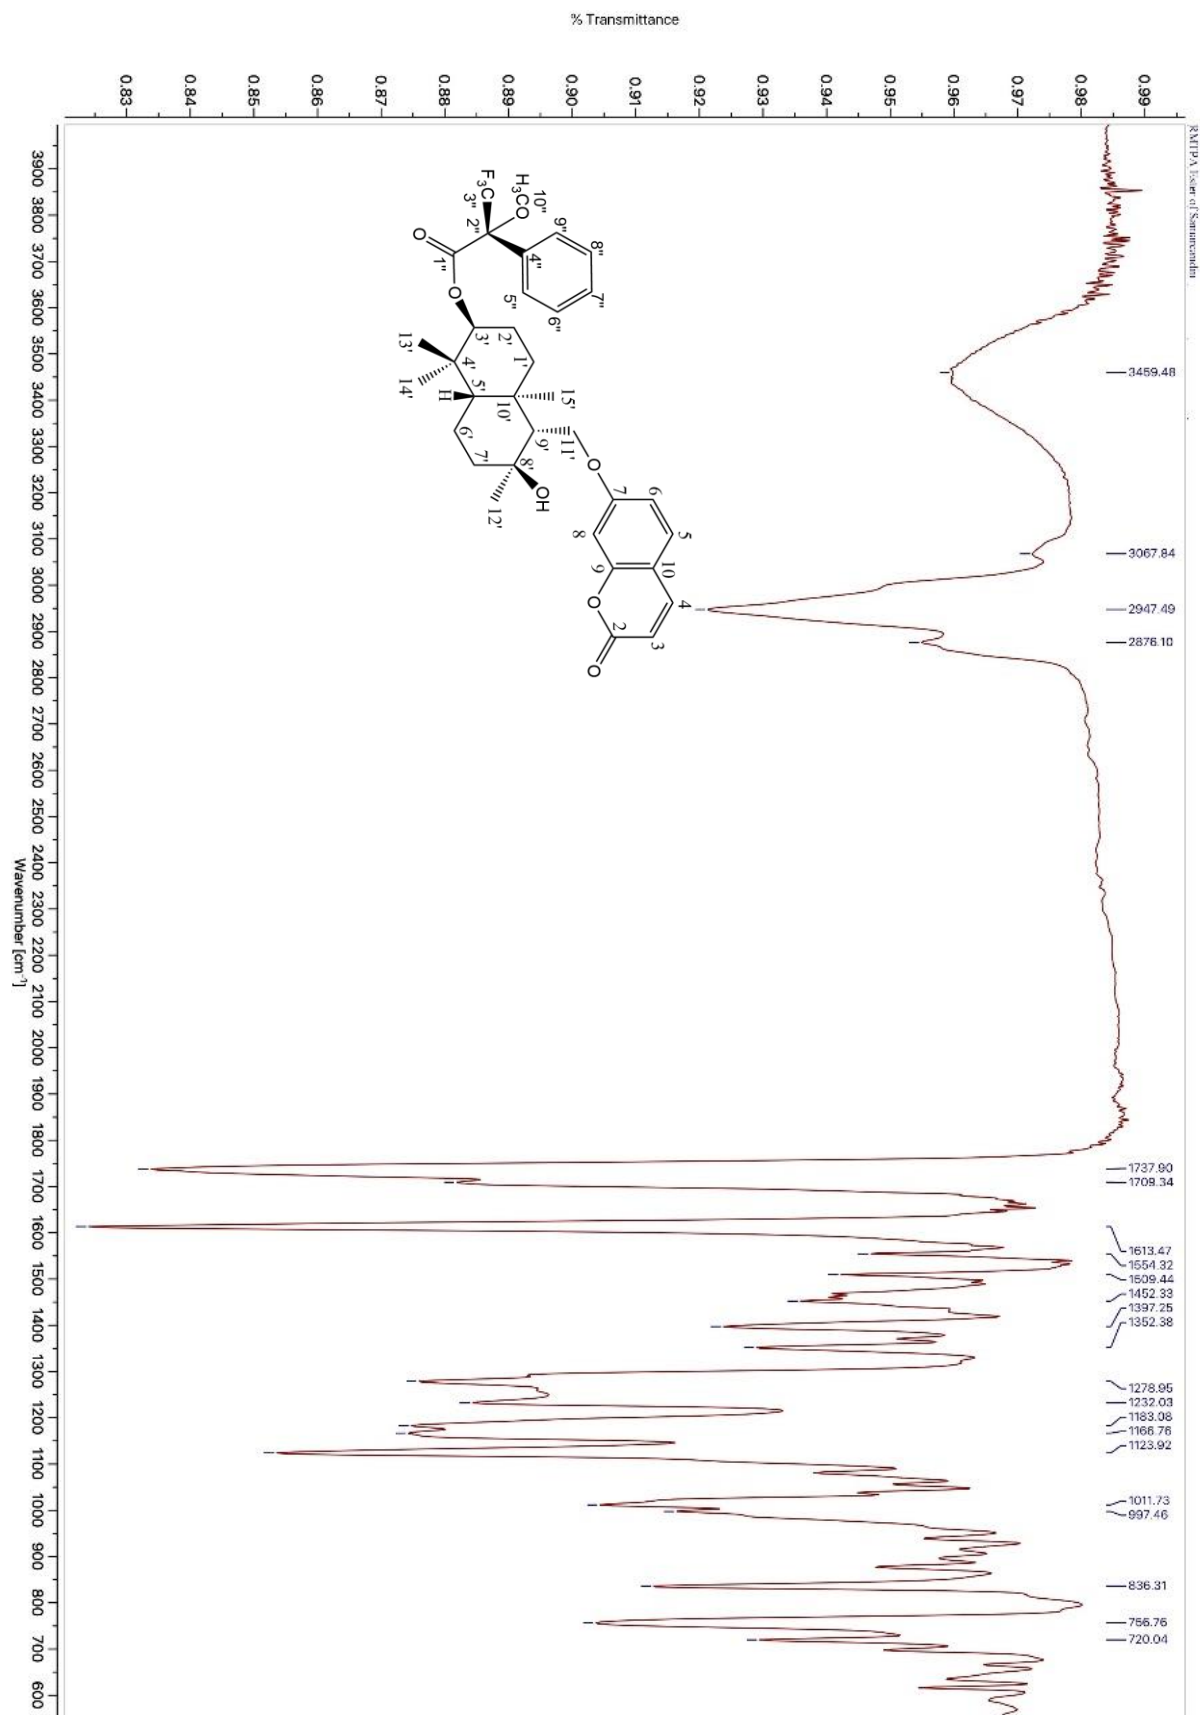

**Figure S107.** IR spectrum of (*R*)-MTPA ester of samarcandin (**24**)

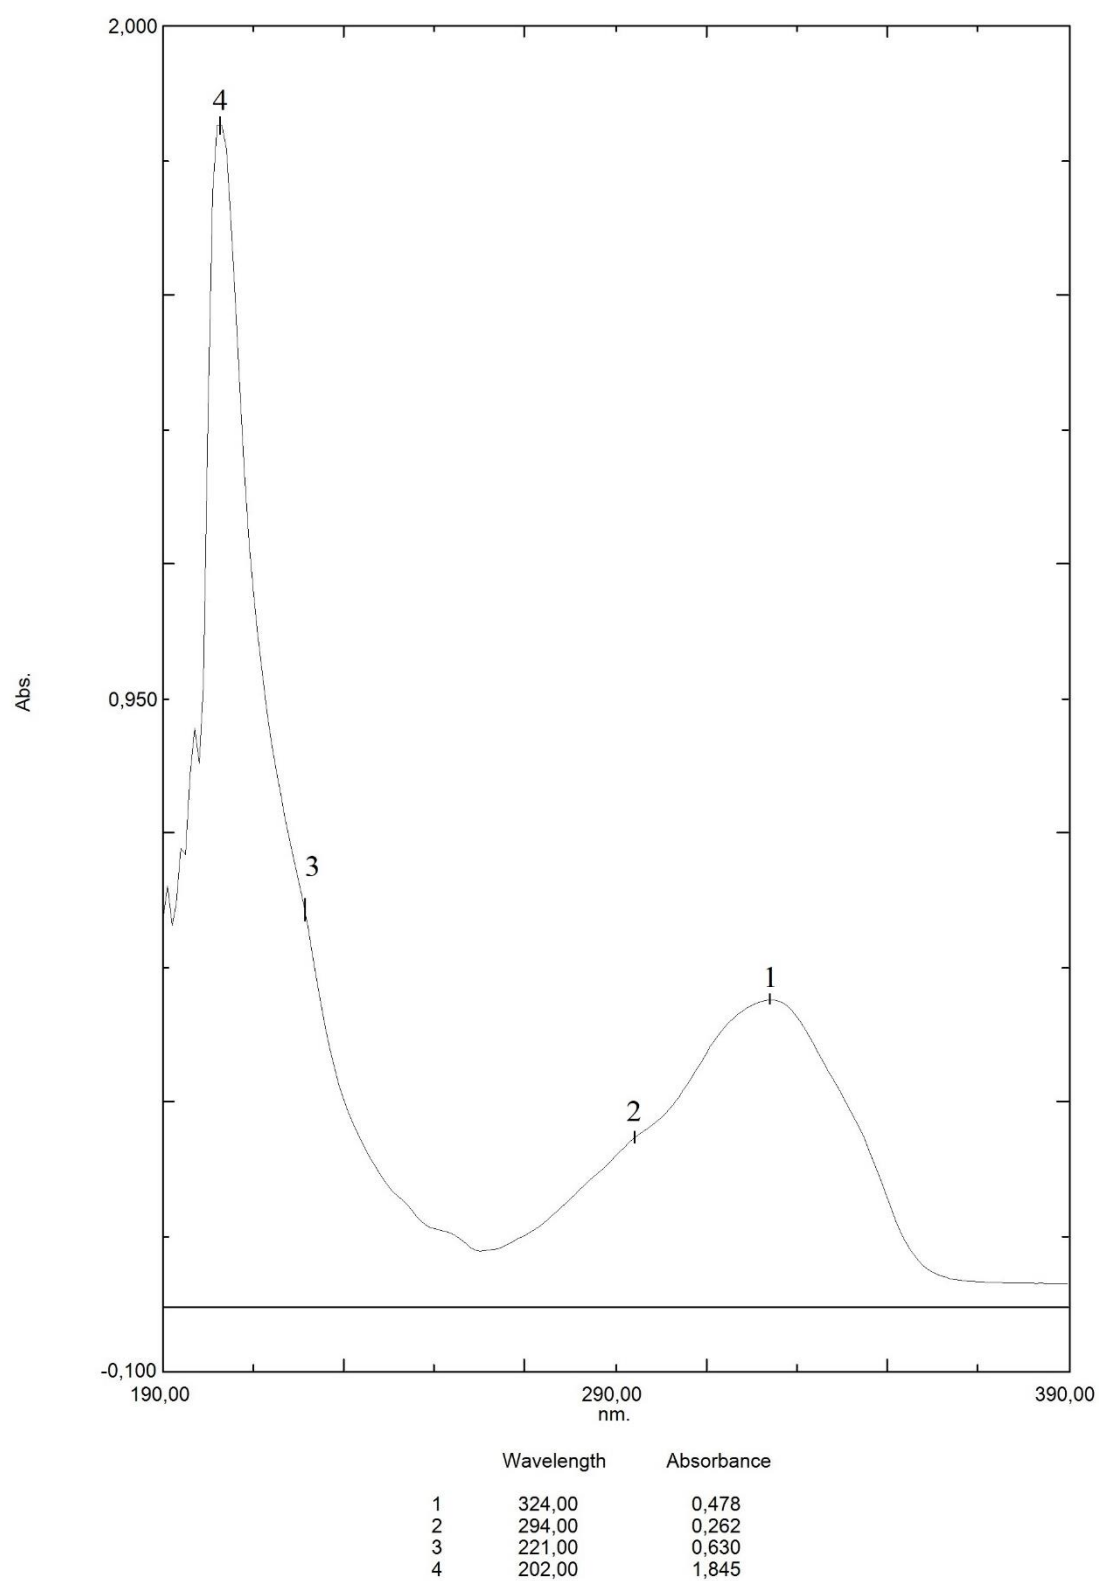

**Figure S108.** UV spectrum of (R)-MTPA ester of samarcandin (24)

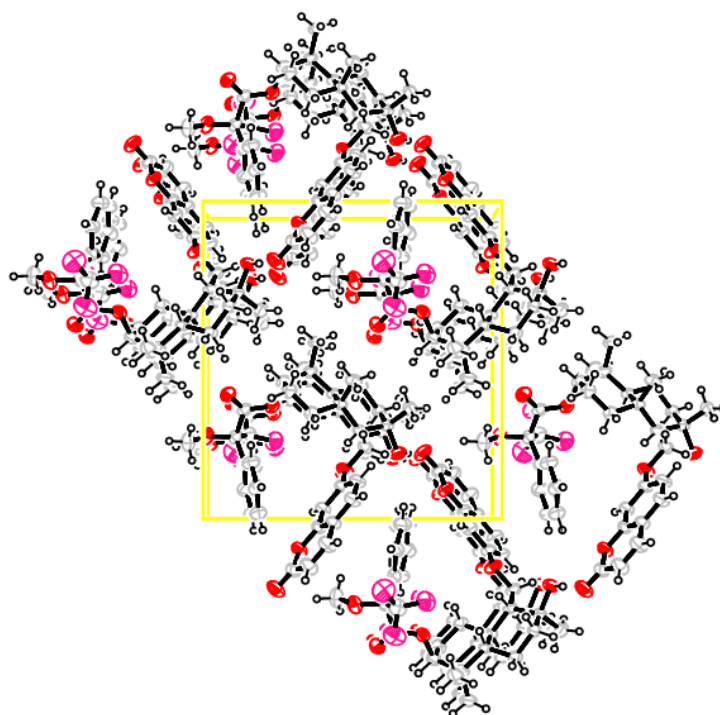

A

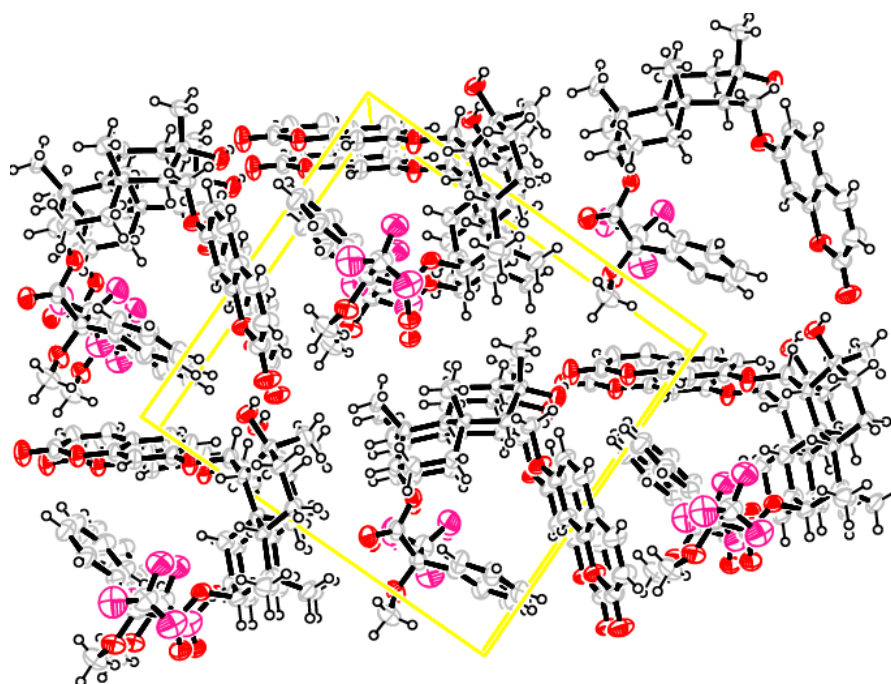

B

**Figure S109.** Packings of the (*R*)-MTPA ester of samarcandin (**24**) in unit cell

**Table S2.** Crystal data and details of the structure determination of (*R*)-MTPA ester of samarcandin (**24**)

|                                                                |                                                               |
|----------------------------------------------------------------|---------------------------------------------------------------|
| Crystal formula                                                | C <sub>34</sub> H <sub>39</sub> F <sub>3</sub> O <sub>7</sub> |
| Formula weight                                                 | 616.15                                                        |
| Crystal dimensions,<br>[mm <sup>3</sup> ]                      | 0.5x0.2x0.2                                                   |
| Temp, [ K]                                                     | 293(2)                                                        |
| Wavelength, [Å]                                                | 0.71073                                                       |
| Crystal system                                                 | Monoclinic                                                    |
| Space group; Z                                                 | P 2 <sub>1</sub> ; 2                                          |
| a, [Å]                                                         | 7.31110(10)                                                   |
| b, [Å]                                                         | 14.0819(4)                                                    |
| c, [Å]                                                         | 14.9790(10)                                                   |
| β, [°]                                                         | 97.977(6)                                                     |
| Volume [Å <sup>3</sup> ]                                       | 1527.23(11)                                                   |
| Dcalc [g.cm <sup>-3</sup> ]                                    | 1.341                                                         |
| F(000)                                                         | 652.0                                                         |
| Abs. coefficient (μ, mm <sup>-1</sup> )                        | 0.104                                                         |
| Range of θ, [°]                                                | 3.10 to 27.47                                                 |
| Reflections collected                                          | 36935                                                         |
| Reflections used in<br>refinement                              | 6992                                                          |
| No. of refined<br>parameters                                   | 413                                                           |
| Absorption correction                                          | Multi-scan                                                    |
| Refinement method                                              | Full matrix                                                   |
| R / R <sub>w</sub> values                                      | 0.0379/ 0.1049                                                |
| GOF                                                            | 1.056                                                         |
| Final shift                                                    | 0.000                                                         |
| (Δρ) <sub>min</sub> , (Δρ) <sub>max</sub> (e Å <sup>-3</sup> ) | 0.252, - 0.203                                                |

S 122 of S 123

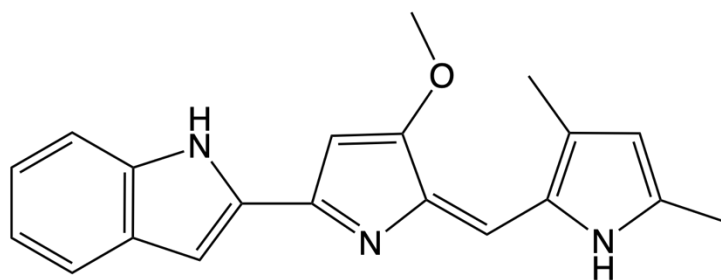

**Obatoclax** (Reference Compound for Bcl-XL &  $\beta$ -Catenin)

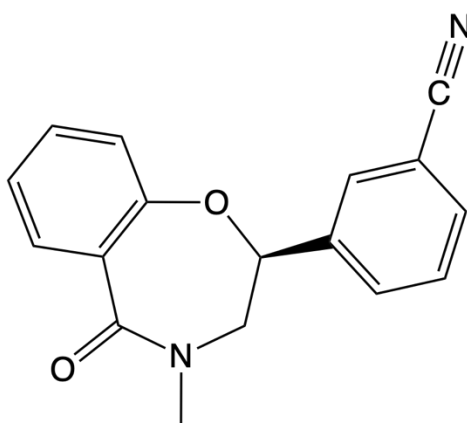

**Compound 6** (Co-crystalized Ligand for  $\beta$ -Catenin)

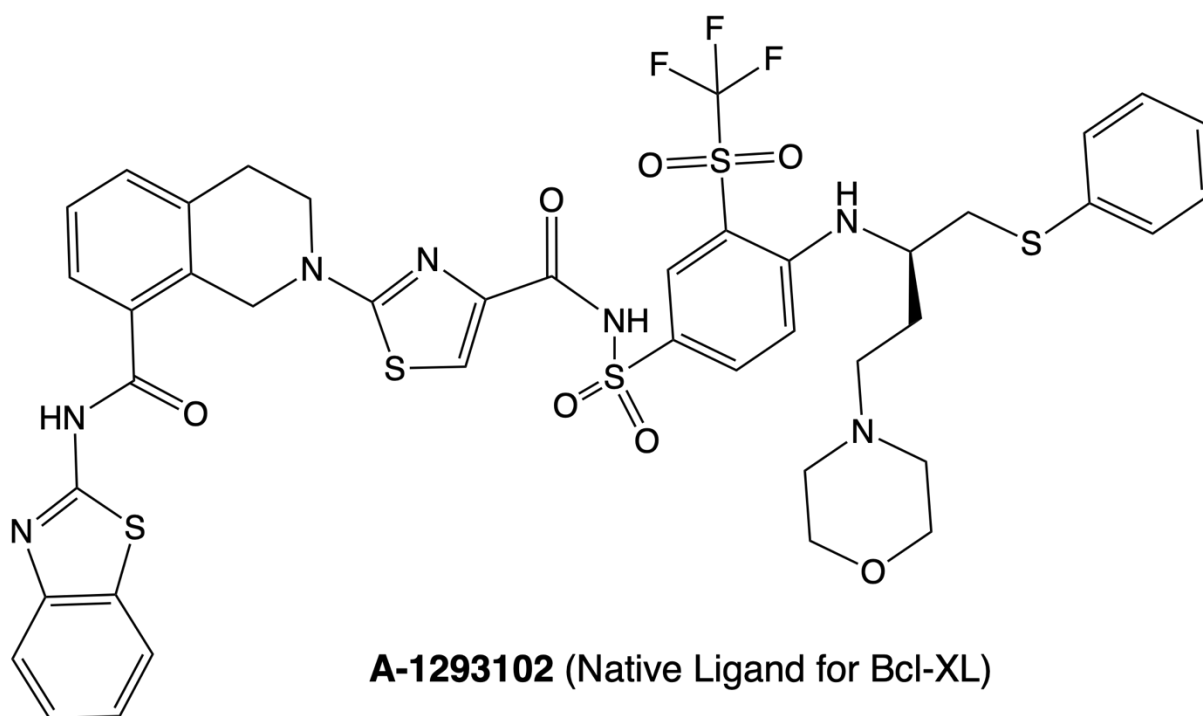

**A-1293102** (Native Ligand for Bcl-XL)

**Figure S110.** Structures of Bcl-XL and  $\beta$ -Catenin ligands

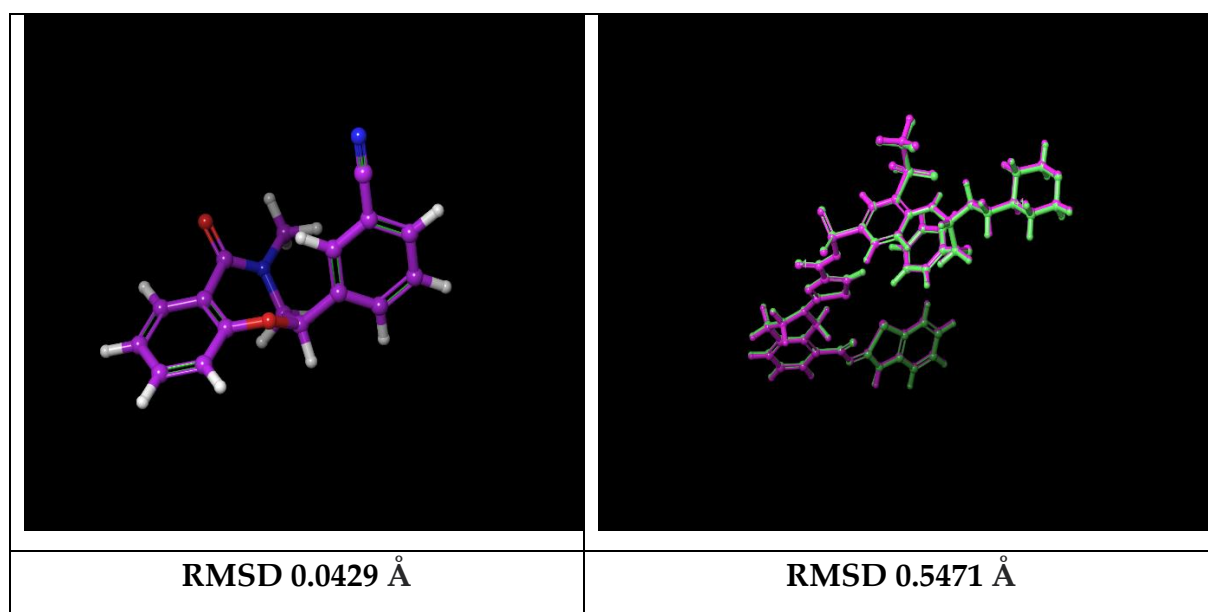

**Figure S111.** Validation of the docking models. Superposition of docked pose and experimental binding conformation (green) of Native Ligands in the binding pocket of 7AFW (left), 7LH7 (right)

## References

1. Abd El-Razek, M.H.; Ohta, S.; Hirata, T. Terpenoid coumarins of the genus *Ferula*. *Heterocycles* **2003**, *60*(3), 689 - 716.
2. Ban'kovskii, A.I.; Ermatov, N.E.; Perel'son, M.E.; Bubeva-Ivanova, L.; Pavlova, N.S. Structure of the coumarins colladin and colladonin. II. *Chem. Nat. Compd.* **1970**, *6*, 170-176.
3. Aydogan, F.; Baykan, S.; Soliman, G.A.; Yusufoglu, H.; Bedir, E. Evaluation of the potential aphrodisiac activity of sesquiterpenoids from roots of *Ferula huber-morathii* Peşmen in male rats. *J. Ethnopharmacol.* **2020**, *257*, 112868.
